# Supplementary material for: The key features of SARS-CoV-2 leader and NSP1 required for viral escape of NSP1-mediated repression
Source: RNA. 2022 May;28(5):766–79. doi: 10.1261/rna.079086.121 (PMC9014875; doi:10.1261/rna.079086.121)
Supplement: Supplemental Material [file supp_079086.121_Supplemental_Table_S1_proteomics.xlsx]

## Sheet: NSP1 bioID
Accession	gene_name	Description	Protein.Function	log2fc_Nsp1-S2/mock	log2fc_Nsp1-S2/Nsp1-S2-KH164AA	log2fc_Nsp1-S2-RK124AA/mock	log2fc_Nsp1-S2-KH164AA/mock	log2fc_RK124AA/KH164AA	log2fc_Nsp1-S2/Nsp1-S2-RK124AA	-log10(pval)_Nsp1-S2/mock	-log10(pval)_Nsp1-S2/Nsp1-S2-KH164AA	-log10(pval)_Nsp1-S2-RK124AA/mock	-log10(pval)_Nsp1-S2-KH164AA/mock	-log10(pval)_RK124AA/KH164AA	-log10(pval)_Nsp1-S2/Nsp1-S2-RK124AA
A1L170	C1orf226	Uncharacterized protein C1orf226 OS=Homo sapiens OX=9606 GN=C1orf226 PE=1 SV=1	NA	1.87886	1.87135	0.447329	0.0075117	0.439817	1.43153	2.20172	2.62334	0.0781275	0.00481845	0.0461368	0.916057
A1X283	SH3PXD2B	SH3 and PX domain-containing protein 2B OS=Homo sapiens OX=9606 GN=SH3PXD2B PE=1 SV=3	NA	-3.19215	-2.13941	-1.82409	-1.05274	-0.77135	-1.36806	2.18365	1.35709	0.81468	0.444286	0.125327	0.88627
A3KN83	SBNO1	Protein strawberry notch homolog 1 OS=Homo sapiens OX=9606 GN=SBNO1 PE=1 SV=1	NA	0.497579	1.20094	-0.29943	-0.703362	0.403932	0.797009	0.352205	1.94797	0.0610935	0.342013	0.102463	0.811629
A4D1E9	GTPBP10	GTP-binding protein 10 OS=Homo sapiens OX=9606 GN=GTPBP10 PE=1 SV=1	NA	1.36679	1.79197	-0.622291	-0.425172	-0.197119	1.98909	1.22388	1.81615	0.224748	0.257512	0.0334519	1.73188
bioID-Nsp1-S1	NA	bioID-Nsp1-S1	NA	0.17915	-0.180209	1.16868	0.35936	0.809322	-0.989532	0.14711	0.128243	0.27238	0.156011	0.0899111	0.569103
bioID-Nsp1-S2	NA	bioID-Nsp1-S2	NA	-0.540091	-4.20927	2.35826	3.66918	-1.31091	-2.89835	0.47168	4.04234	1.58463	3.67608	0.601854	2.81285
E9PRG8	C11orf98	Uncharacterized protein C11orf98 OS=Homo sapiens OX=9606 GN=C11orf98 PE=4 SV=2	NA	-1.46718	-3.35162	1.23621	1.88444	-0.648226	-2.70339	1.46123	3.71217	0.47101	1.39956	0.176458	2.62805
P39023	RPL3	60S ribosomal protein L3 OS=Homo sapiens OX=9606 GN=RPL3 PE=1 SV=2	NA	2.32488	3.24898	-0.548503	-0.924097	0.375594	2.87339	2.2647	4.04234	0.145986	0.509927	0.0713647	3.05161
O00116	AGPS	Alkyldihydroxyacetonephosphate synthase, peroxisomal OS=Homo sapiens OX=9606 GN=AGPS PE=1 SV=1	NA	0.730954	0.74279	0.453161	-0.0118356	0.464997	0.277793	0.879735	0.970578	0.16362	0.00604799	0.107825	0.209755
O00139	KIF2A	Kinesin-like protein KIF2A OS=Homo sapiens OX=9606 GN=KIF2A PE=1 SV=3	NA	0.567007	0.582428	-1.03825	-0.0154208	-1.02283	1.60526	0.31429	0.308388	0.316912	0.00481845	0.195563	1.73188
O00154	ACOT7	Cytosolic acyl coenzyme A thioester hydrolase OS=Homo sapiens OX=9606 GN=ACOT7 PE=1 SV=3	NA	0.414752	1.61378	-2.0391	-1.19903	-0.840066	2.45385	0.123133	1.29255	0.41863	0.265386	0.178136	2.41806
O00159	MYO1C	Unconventional myosin-Ic OS=Homo sapiens OX=9606 GN=MYO1C PE=1 SV=4	NA	2.22148	2.44505	-0.218414	-0.22357	0.00515572	2.4399	2.58204	3.58146	0.0574086	0.10404	0.00447354	3.00476
O00178	GTPBP1	GTP-binding protein 1 OS=Homo sapiens OX=9606 GN=GTPBP1 PE=1 SV=3	NA	2.37462	3.05605	-0.670587	-0.681425	0.0108385	3.04521	2.73742	3.71217	0.27238	0.382532	0.00477198	3.29171
O00186	STXBP3	Syntaxin-binding protein 3 OS=Homo sapiens OX=9606 GN=STXBP3 PE=1 SV=2	NA	-0.0873671	2.15471	-1.75498	-2.24208	0.487104	1.66761	0.04328	0.90399	0.246818	0.487839	0.0243878	0.647343
O00203	AP3B1	AP-3 complex subunit beta-1 OS=Homo sapiens OX=9606 GN=AP3B1 PE=1 SV=3	NA	1.24336	1.34367	2.55561	-0.100319	2.65593	-1.31225	0.748158	0.886907	0.417709	0.0458812	0.340112	0.397709
O00231	PSMD11	26S proteasome non-ATPase regulatory subunit 11 OS=Homo sapiens OX=9606 GN=PSMD11 PE=1 SV=3	NA	-0.917025	-2.2182	0.372919	1.30117	-0.928254	-1.28994	0.764197	2.20057	0.0781275	0.698401	0.170108	0.961386
O00232	PSMD12	26S proteasome non-ATPase regulatory subunit 12 OS=Homo sapiens OX=9606 GN=PSMD12 PE=1 SV=3	NA	0.395225	0.522388	-0.189854	-0.127163	-0.0626903	0.585078	0.292409	0.466457	0.0382719	0.0424993	0.0126737	0.422355
O00264	PGRMC1	Membrane-associated progesterone receptor component 1 OS=Homo sapiens OX=9606 GN=PGRMC1 PE=1 SV=3	NA	0.46513	-0.158105	-0.292674	0.623235	-0.915909	0.757804	0.305916	0.119822	0.0504831	0.298524	0.251933	0.549739
O00410	IPO5	Importin-5 OS=Homo sapiens OX=9606 GN=IPO5 PE=1 SV=4	NA	-0.0691136	-0.153891	-0.0247082	0.0847771	-0.109485	-0.0444054	0.0341852	0.117126	0.00407757	0.025436	0.0228278	0.0257317
O00411	POLRMT	DNA-directed RNA polymerase, mitochondrial OS=Homo sapiens OX=9606 GN=POLRMT PE=1 SV=2	NA	0.456658	1.35071	0.63139	-0.894055	1.52545	-0.174732	0.293566	1.13555	0.148122	0.417408	0.340112	0.0731106
O00425	IGF2BP3	Insulin-like growth factor 2 mRNA-binding protein 3 OS=Homo sapiens OX=9606 GN=IGF2BP3 PE=1 SV=2	NA	-0.0342971	0.920346	-1.52384	-0.954643	-0.569197	1.48954	0.00440462	0.459073	0.167883	0.126541	0.120304	0.88763
O00458	IFRD1	Interferon-related developmental regulator 1 OS=Homo sapiens OX=9606 GN=IFRD1 PE=1 SV=4	NA	1.43488	2.05059	0.15906	-0.615711	0.774772	1.27582	1.17526	2.04553	0.0354405	0.342013	0.251933	1.00591
O00487	PSMD14	26S proteasome non-ATPase regulatory subunit 14 OS=Homo sapiens OX=9606 GN=PSMD14 PE=1 SV=1	NA	2.33099	1.74598	2.64456	0.585011	2.05955	-0.313573	0.463085	0.321999	0.231272	0.191005	0.0899111	0.0336868
O00506	STK25	Serine/threonine-protein kinase 25 OS=Homo sapiens OX=9606 GN=STK25 PE=1 SV=1	NA	0.804406	1.06324	-0.184627	-0.258837	0.0742101	0.989033	0.47727	0.825628	0.0382719	0.101131	0.0183377	0.719389
O00541	PES1	Pescadillo homolog OS=Homo sapiens OX=9606 GN=PES1 PE=1 SV=1	NA	0.932955	1.8303	-0.824024	-0.897343	0.0733192	1.75698	1.2709	3.04314	0.403602	0.755452	0.0216655	2.29677
O00567	NOP56	Nucleolar protein 56 OS=Homo sapiens OX=9606 GN=NOP56 PE=1 SV=4	NA	1.23109	2.36873	-0.829135	-1.13764	0.308507	2.06022	1.63228	3.71217	0.316912	0.852904	0.0675567	2.41806
O00571	DDX3X	ATP-dependent RNA helicase DDX3X OS=Homo sapiens OX=9606 GN=DDX3X PE=1 SV=3	NA	2.8287	1.71494	-0.00727253	1.11376	-1.12103	2.83597	2.91067	2.29398	0.0031872	0.698401	0.348953	2.91531
O14531	DPYSL4	Dihydropyrimidinase-related protein 4 OS=Homo sapiens OX=9606 GN=DPYSL4 PE=1 SV=2	NA	-1.77201	-2.51646	-1.0842	0.744455	-1.82866	-0.687804	1.34963	2.39171	0.305038	0.362347	0.678426	0.38397
O14617	AP3D1	AP-3 complex subunit delta-1 OS=Homo sapiens OX=9606 GN=AP3D1 PE=1 SV=1	NA	0.716427	1.18958	-0.572725	-0.473155	-0.0995693	1.28915	0.622838	1.47534	0.191621	0.261742	0.0228278	1.2565
O14646	CHD1	Chromodomain-helicase-DNA-binding protein 1 OS=Homo sapiens OX=9606 GN=CHD1 PE=1 SV=2	NA	1.9797	2.32321	-0.403796	-0.343503	-0.0602924	2.3835	2.28899	3.04841	0.159974	0.231495	0.0143271	2.72365
O14654	IRS4	Insulin receptor substrate 4 OS=Homo sapiens OX=9606 GN=IRS4 PE=1 SV=1	NA	2.16505	2.13972	-0.690108	0.0253362	-0.715445	2.85516	2.55024	2.84599	0.312649	0.0115748	0.251933	3.13224
O14757	CHEK1	Serine/threonine-protein kinase Chk1 OS=Homo sapiens OX=9606 GN=CHEK1 PE=1 SV=2	NA	1.57356	1.64615	-0.462506	-0.0725932	-0.389912	2.03606	0.907002	0.992283	0.149038	0.0301678	0.0677251	1.24717
O14776	TCERG1	Transcription elongation regulator 1 OS=Homo sapiens OX=9606 GN=TCERG1 PE=1 SV=2	NA	-0.908691	-1.50532	-0.718029	0.596626	-1.31466	-0.190662	0.516239	1.95891	0.133491	0.190793	0.357406	0.0895666
O14802	POLR3A	DNA-directed RNA polymerase III subunit RPC1 OS=Homo sapiens OX=9606 GN=POLR3A PE=1 SV=2	NA	1.23068	1.69299	-0.558661	-0.462312	-0.0963495	1.78934	1.75284	2.9529	0.266351	0.359956	0.0243878	2.42147
O14818	PSMA7	Proteasome subunit alpha type-7 OS=Homo sapiens OX=9606 GN=PSMA7 PE=1 SV=1	NA	0.115649	1.66852	-0.836101	-1.55287	0.716774	0.951749	0.0362094	1.17649	0.114386	0.463805	0.0675567	0.399722
O14828	SCAMP3	Secretory carrier-associated membrane protein 3 OS=Homo sapiens OX=9606 GN=SCAMP3 PE=1 SV=3	NA	2.13923	0.438003	2.40247	1.70122	0.701251	-0.263248	1.09603	0.179675	0.762875	0.845109	0.16311	0.0893279
O14880	MGST3	Microsomal glutathione S-transferase 3 OS=Homo sapiens OX=9606 GN=MGST3 PE=1 SV=1	NA	-0.0360975	1.14259	-1.6698	-1.17869	-0.491111	1.6337	0.0183606	1.066	0.81468	0.591019	0.0721191	1.82846
O14929	HAT1	Histone acetyltransferase type B catalytic subunit OS=Homo sapiens OX=9606 GN=HAT1 PE=1 SV=1	NA	0.367315	-1.44375	-0.541516	1.81106	-2.35258	0.908831	0.0918384	1.56458	0.0421471	0.397424	0.512563	0.450981
O14950	MYL12B	Myosin regulatory light chain 12B OS=Homo sapiens OX=9606 GN=MYL12B PE=1 SV=2	NA	0.210286	1.98696	-1.68785	-1.77667	0.0888183	1.89814	0.0597945	1.67153	0.41863	0.618683	0.0228278	1.56625
O15042	U2SURP	U2 snRNP-associated SURP motif-containing protein OS=Homo sapiens OX=9606 GN=U2SURP PE=1 SV=2	NA	0.177994	-0.468043	0.894576	0.646037	0.248539	-0.716582	0.0862042	0.352934	0.138568	0.231495	0.0228278	0.290842
O15067	PFAS	Phosphoribosylformylglycinamidine synthase OS=Homo sapiens OX=9606 GN=PFAS PE=1 SV=4	NA	0.615257	0.608767	0.168533	0.00648946	0.162044	0.446724	0.774903	0.863516	0.0507578	0.00481845	0.037936	0.44007
O15213	WDR46	WD repeat-containing protein 46 OS=Homo sapiens OX=9606 GN=WDR46 PE=1 SV=3	NA	1.03483	1.27189	-1.12658	-0.237053	-0.889532	2.16142	1.29435	0.940054	0.613657	0.0565728	0.147262	2.6889
O15226	NKRF	NF-kappa-B-repressing factor OS=Homo sapiens OX=9606 GN=NKRF PE=1 SV=2	NA	1.72122	2.43566	-1.16247	-0.714441	-0.44803	2.88369	1.84079	3.04841	0.492119	0.472288	0.102463	2.946
O15228	GNPAT	Dihydroxyacetone phosphate acyltransferase OS=Homo sapiens OX=9606 GN=GNPAT PE=1 SV=1	NA	-0.131138	0.177272	-0.381006	-0.30841	-0.0725957	0.249868	0.0419012	0.0686573	0.0433275	0.0565728	0.008124	0.09457
O15347	HMGB3	High mobility group protein B3 OS=Homo sapiens OX=9606 GN=HMGB3 PE=1 SV=4	NA	-0.981783	-1.03578	1.13785	0.0540001	1.08385	-2.11964	0.348455	0.441991	0.280774	0.0154241	0.309249	1.03499
O15355	PPM1G	Protein phosphatase 1G OS=Homo sapiens OX=9606 GN=PPM1G PE=1 SV=1	NA	1.7279	1.00641	0.489509	0.721494	-0.231985	1.23839	1.84061	0.964899	0.150231	0.417408	0.0366268	1.10896
O15371	EIF3D	Eukaryotic translation initiation factor 3 subunit D OS=Homo sapiens OX=9606 GN=EIF3D PE=1 SV=1	NA	NA	NA	-1.32274	-1.14346	-0.179273	NA	NA	NA	0.305038	0.403416	0.0228278	NA
O15371	EIF3D	Eukaryotic translation initiation factor 3 subunit D OS=Homo sapiens OX=9606 GN=EIF3D PE=1 SV=1	translation initiation factor (eIF)	1.7626	2.90606	NA	NA	NA	3.08534	1.67681	2.73338	NA	NA	NA	2.50644
O15417	TNRC18	Trinucleotide repeat-containing gene 18 protein OS=Homo sapiens OX=9606 GN=TNRC18 PE=1 SV=3	NA	0.791763	0.606325	-0.464383	0.185439	-0.649822	1.25615	0.365555	0.274196	0.073818	0.0301678	0.0675567	0.893226
O15479	MAGEB2	Melanoma-associated antigen B2 OS=Homo sapiens OX=9606 GN=MAGEB2 PE=1 SV=3	NA	0.878052	1.26498	-0.751143	-0.386929	-0.364214	1.62919	1.01023	1.87489	0.280694	0.205557	0.0677251	1.86088
O43143	DHX15	Pre-mRNA-splicing factor ATP-dependent RNA helicase DHX15 OS=Homo sapiens OX=9606 GN=DHX15 PE=1 SV=2	NA	-0.0722129	2.11032	-1.77883	-2.18254	0.403709	1.70662	0.0300289	3.03868	0.47964	0.948188	0.0675567	1.63858
O43159	RRP8	Ribosomal RNA-processing protein 8 OS=Homo sapiens OX=9606 GN=RRP8 PE=1 SV=2	NA	2.29386	2.80831	-0.420006	-0.514448	0.0944421	2.71386	2.36719	3.54506	0.150231	0.316739	0.0243878	3.11208
O43172	PRPF4	U4/U6 small nuclear ribonucleoprotein Prp4 OS=Homo sapiens OX=9606 GN=PRPF4 PE=1 SV=2	NA	-0.0909565	0.410401	-0.321589	-0.501358	0.179769	0.230632	0.0661388	0.340181	0.127728	0.265386	0.027759	0.169567
O43175	PHGDH	D-3-phosphoglycerate dehydrogenase OS=Homo sapiens OX=9606 GN=PHGDH PE=1 SV=4	NA	1.21735	1.14529	-0.0846886	0.0720589	-0.156747	1.30204	1.44089	1.51377	0.0106549	0.0206111	0.0228278	1.11209
O43242	PSMD3	26S proteasome non-ATPase regulatory subunit 3 OS=Homo sapiens OX=9606 GN=PSMD3 PE=1 SV=2	NA	0.561566	2.06511	-0.790654	-1.50355	0.712893	1.35222	0.613054	2.71878	0.350799	1.09687	0.212979	1.52704
O43290	SART1	U4/U6.U5 tri-snRNP-associated protein 1 OS=Homo sapiens OX=9606 GN=SART1 PE=1 SV=1	NA	-1.09514	-1.06933	-0.756232	-0.0258113	-0.73042	-0.33891	1.47666	1.6253	0.316912	0.0133293	0.252522	0.255722
O43390	HNRNPR	Heterogeneous nuclear ribonucleoprotein R OS=Homo sapiens OX=9606 GN=HNRNPR PE=1 SV=1	NA	1.87678	1.62558	0.128478	0.251194	-0.122716	1.7483	1.92689	1.57162	0.0254892	0.0673126	0.0205764	1.73569
O43395	PRPF3	U4/U6 small nuclear ribonucleoprotein Prp3 OS=Homo sapiens OX=9606 GN=PRPF3 PE=1 SV=2	NA	1.06207	0.4689	-0.312323	0.593172	-0.905495	1.3744	0.781705	0.341841	0.0463545	0.190793	0.161848	1.12323
O43615	TIMM44	Mitochondrial import inner membrane translocase subunit TIM44 OS=Homo sapiens OX=9606 GN=TIMM44 PE=1 SV=2	NA	1.00124	0.694249	0.0508318	0.306989	-0.256157	0.950406	1.20999	0.875772	0.00991918	0.172889	0.0599931	1.00591
O43684	BUB3	Mitotic checkpoint protein BUB3 OS=Homo sapiens OX=9606 GN=BUB3 PE=1 SV=1	NA	-2.41212	0.974207	-1.74299	-3.38633	1.64334	-0.669136	0.673624	0.815771	0.142653	0.598131	0.168302	0.197644
O43707	ACTN4	Alpha-actinin-4 OS=Homo sapiens OX=9606 GN=ACTN4 PE=1 SV=2	NA	0.626254	0.339784	0.92602	0.28647	0.63955	-0.299766	0.615839	0.45966	0.211857	0.137818	0.0782462	0.134563
O43709	BUD23	Probable 18S rRNA (guanine-N(7))-methyltransferase OS=Homo sapiens OX=9606 GN=BUD23 PE=1 SV=2	NA	1.68089	2.99387	-1.18136	-1.31298	0.13162	2.86225	1.48954	3.71217	0.37237	0.685518	0.0261385	3.00476
O43776	NARS1	Asparagine--tRNA ligase, cytoplasmic OS=Homo sapiens OX=9606 GN=NARS1 PE=1 SV=1	NA	1.92835	2.08064	-0.417156	-0.152291	-0.264865	2.34551	2.2647	2.97429	0.150231	0.0609007	0.0675567	2.91531
O43795	MYO1B	Unconventional myosin-Ib OS=Homo sapiens OX=9606 GN=MYO1B PE=1 SV=3	NA	1.33217	2.43273	-0.192783	-1.10056	0.907778	1.52495	1.7063	3.63323	0.0348945	0.845109	0.168302	1.21576
O43824	GTPBP6	Putative GTP-binding protein 6 OS=Homo sapiens OX=9606 GN=GTPBP6 PE=2 SV=4	NA	1.71932	1.92698	0.000144945	-0.207651	0.207796	1.71918	0.953924	1.18684	0.000138375	0.107261	0.0612529	1.03311
O43837	IDH3B	Isocitrate dehydrogenase [NAD] subunit beta, mitochondrial OS=Homo sapiens OX=9606 GN=IDH3B PE=1 SV=2	NA	0.347875	1.02087	-0.326857	-0.672995	0.346138	0.674732	0.165045	0.920413	0.0781275	0.325953	0.0782556	0.470688
O60231	DHX16	Pre-mRNA-splicing factor ATP-dependent RNA helicase DHX16 OS=Homo sapiens OX=9606 GN=DHX16 PE=1 SV=2	NA	2.21944	2.91245	-0.511608	-0.693011	0.181403	2.73105	2.70347	3.87883	0.244545	0.63536	0.0448875	3.18174
O60256	PRPSAP2	Phosphoribosyl pyrophosphate synthase-associated protein 2 OS=Homo sapiens OX=9606 GN=PRPSAP2 PE=1 SV=1	NA	0.0471986	-0.0695054	-0.176139	0.116704	-0.292843	0.223338	0.0175865	0.0461972	0.02584	0.0301678	0.037936	0.106995
O60264	SMARCA5	SWI/SNF-related matrix-associated actin-dependent regulator of chromatin subfamily A member 5 OS=Homo sapiens OX=9606 GN=SMARCA5 PE=1 SV=1	NA	0.127327	1.69104	-1.4884	-1.56371	0.07531	1.61573	0.0921721	2.55939	0.643632	1.39483	0.0127368	1.57009
O60306	AQR	RNA helicase aquarius OS=Homo sapiens OX=9606 GN=AQR PE=1 SV=4	NA	1.09065	0.747772	0.141266	0.342877	-0.201612	0.949383	0.613054	0.481342	0.0332432	0.137649	0.0472139	0.62508
O60333	KIF1B	Kinesin-like protein KIF1B OS=Homo sapiens OX=9606 GN=KIF1B PE=1 SV=5	NA	1.29242	1.12052	0.139988	0.171899	-0.0319111	1.15243	1.44065	1.42193	0.0371717	0.0599075	0.00704957	1.37117
O60488	ACSL4	Long-chain-fatty-acid--CoA ligase 4 OS=Homo sapiens OX=9606 GN=ACSL4 PE=1 SV=2	NA	0.965824	0.748275	-0.0181022	0.217549	-0.235651	0.983926	0.763258	0.492972	0.00407757	0.0631207	0.0334519	0.764044
O60506	SYNCRIP	Heterogeneous nuclear ribonucleoprotein Q OS=Homo sapiens OX=9606 GN=SYNCRIP PE=1 SV=2	NA	-0.1345	-0.00768476	0.179082	-0.126815	0.305897	-0.313581	0.04328	0.00172691	0.0382719	0.0310945	0.0369597	0.119812
O60508	CDC40	Pre-mRNA-processing factor 17 OS=Homo sapiens OX=9606 GN=CDC40 PE=1 SV=1	NA	0.103075	0.149178	0.0538733	-0.0461027	0.0999761	0.0492019	0.0422377	0.0726398	0.00933384	0.0156219	0.0228278	0.0220436
O60524	NEMF	Nuclear export mediator factor NEMF OS=Homo sapiens OX=9606 GN=NEMF PE=1 SV=4	NA	1.82347	2.11024	-0.610833	-0.286774	-0.324058	2.4343	2.27376	3.20824	0.27238	0.199094	0.0782556	2.8735
O60563	CCNT1	Cyclin-T1 OS=Homo sapiens OX=9606 GN=CCNT1 PE=1 SV=1	NA	-2.02742	-0.382164	-1.02672	-1.64526	0.618533	-1.0007	1.38853	0.196996	0.159469	0.445086	0.0602307	0.60318
O60610	DIAPH1	Protein diaphanous homolog 1 OS=Homo sapiens OX=9606 GN=DIAPH1 PE=1 SV=2	NA	0.17643	0.376527	0.746344	-0.200097	0.946441	-0.569914	0.11364	0.313416	0.246818	0.0930156	0.252522	0.383631
O60678	PRMT3	Protein arginine N-methyltransferase 3 OS=Homo sapiens OX=9606 GN=PRMT3 PE=1 SV=4	NA	2.29653	2.34157	0.127321	-0.0450371	0.172358	2.16921	2.36719	3.04841	0.0378915	0.0173201	0.0448875	2.46346
O60716	CTNND1	Catenin delta-1 OS=Homo sapiens OX=9606 GN=CTNND1 PE=1 SV=1	NA	1.25406	1.07238	0.169619	0.18168	-0.0120606	1.08444	0.909534	0.781783	0.0371717	0.0455664	0.00463192	0.856894
O60749	SNX2	Sorting nexin-2 OS=Homo sapiens OX=9606 GN=SNX2 PE=1 SV=2	NA	0.501521	0.409688	-0.288568	0.0918334	-0.380402	0.790089	0.534052	0.535017	0.0950999	0.0427242	0.103273	0.854315
O60762	DPM1	Dolichol-phosphate mannosyltransferase subunit 1 OS=Homo sapiens OX=9606 GN=DPM1 PE=1 SV=1	NA	1.21094	1.58323	0.245217	-0.372286	0.617503	0.965726	1.56544	2.82748	0.0693469	0.227168	0.251933	1.11578
O60763	USO1	General vesicular transport factor p115 OS=Homo sapiens OX=9606 GN=USO1 PE=1 SV=2	NA	0.337074	0.838846	0.00766412	-0.501773	0.509437	0.329409	0.184775	0.844163	0.00296815	0.139062	0.0731214	0.239567
O60814	H2BC12	Histone H2B type 1-K OS=Homo sapiens OX=9606 GN=H2BC12 PE=1 SV=3	NA	-1.47588	-2.13932	0.546977	0.663443	-0.116466	-2.02286	1.53418	2.48552	0.204118	0.404951	0.0228278	2.12874
O60832	DKC1	H/ACA ribonucleoprotein complex subunit DKC1 OS=Homo sapiens OX=9606 GN=DKC1 PE=1 SV=3	NA	-0.564263	-0.565746	-0.322537	0.00148269	-0.324019	-0.241726	0.323714	0.371298	0.0574086	0.000741977	0.0448875	0.0953046
O60841	EIF5B	Eukaryotic translation initiation factor 5B OS=Homo sapiens OX=9606 GN=EIF5B PE=1 SV=4	NA	-0.0983378	-0.660752	0.463867	0.562414	-0.0985467	-0.562205	0.078124	0.909644	0.0888302	0.420348	0.0127368	0.297772
O75152	ZC3H11A	Zinc finger CCCH domain-containing protein 11A OS=Homo sapiens OX=9606 GN=ZC3H11A PE=1 SV=3	NA	-1.80144	-2.31388	-0.951706	0.512439	-1.46415	-0.849732	2.08388	3.01692	0.400262	0.253587	0.693869	0.926016
O75153	CLUH	Clustered mitochondria protein homolog OS=Homo sapiens OX=9606 GN=CLUH PE=1 SV=2	NA	-0.930784	0.466179	-1.78633	-1.39696	-0.389365	0.855544	0.781705	0.429287	0.575436	0.685518	0.0602307	0.682883
O75251	NDUFS7	NADH dehydrogenase [ubiquinone] iron-sulfur protein 7, mitochondrial OS=Homo sapiens OX=9606 GN=NDUFS7 PE=1 SV=3	NA	0.887903	1.30307	-0.646612	-0.415164	-0.231448	1.53452	1.08895	2.30211	0.246818	0.261742	0.0461368	1.80764
O75367	H2AFY	Core histone macro-H2A.1 OS=Homo sapiens OX=9606 GN=H2AFY PE=1 SV=4	NA	-1.67131	-0.452356	-0.116014	-1.21895	1.10294	-1.55529	1.61243	0.358143	0.027988	0.710709	0.414717	1.62214
O75396	SEC22B	Vesicle-trafficking protein SEC22b OS=Homo sapiens OX=9606 GN=SEC22B PE=1 SV=4	NA	0.0531612	0.235802	-0.319927	-0.182641	-0.137287	0.373088	0.0297941	0.15385	0.122315	0.0784295	0.0254551	0.255722
O75439	PMPCB	Mitochondrial-processing peptidase subunit beta OS=Homo sapiens OX=9606 GN=PMPCB PE=1 SV=2	NA	0.566654	0.713198	-0.316837	-0.146543	-0.170293	0.883491	0.51493	0.765919	0.124417	0.0631207	0.0371446	0.889599
O75475	PSIP1	PC4 and SFRS1-interacting protein OS=Homo sapiens OX=9606 GN=PSIP1 PE=1 SV=1	NA	-0.741421	-1.40354	-0.419848	0.662118	-1.08197	-0.321572	0.338542	0.955226	0.0574086	0.227168	0.171003	0.112847
O75521	ECI2	Enoyl-CoA delta isomerase 2, mitochondrial OS=Homo sapiens OX=9606 GN=ECI2 PE=1 SV=4	NA	1.07656	0.921133	0.049307	0.155423	-0.106116	1.02725	0.909534	0.799699	0.00991918	0.0624068	0.0228278	0.88763
O75533	SF3B1	Splicing factor 3B subunit 1 OS=Homo sapiens OX=9606 GN=SF3B1 PE=1 SV=3	NA	0.865701	0.5308	0.815912	0.334901	0.481011	0.0497892	0.849275	0.601259	0.298483	0.137649	0.107825	0.03047
O75592	MYCBP2	E3 ubiquitin-protein ligase MYCBP2 OS=Homo sapiens OX=9606 GN=MYCBP2 PE=1 SV=4	NA	0.749986	0.5228	0.199134	0.227185	-0.0280516	0.550852	0.682626	0.499578	0.0394687	0.101296	0.00503617	0.403306
O75607	NPM3	Nucleoplasmin-3 OS=Homo sapiens OX=9606 GN=NPM3 PE=1 SV=3	NA	0.208418	0.0286761	-0.367968	0.179742	-0.54771	0.576386	0.0820172	0.00607142	0.0950999	0.0360653	0.0612529	0.269207
O75643	SNRNP200	U5 small nuclear ribonucleoprotein 200 kDa helicase OS=Homo sapiens OX=9606 GN=SNRNP200 PE=1 SV=2	NA	1.27955	1.62295	-0.453255	-0.343404	-0.10985	1.7328	1.53796	2.35596	0.131738	0.153934	0.0228278	1.90336
O75683	SURF6	Surfeit locus protein 6 OS=Homo sapiens OX=9606 GN=SURF6 PE=1 SV=3	NA	-1.21181	-0.625538	-2.47554	-0.586276	-1.88926	1.26372	0.993916	0.488049	1.33357	0.261742	0.872884	1.12502
O75691	UTP20	Small subunit processome component 20 homolog OS=Homo sapiens OX=9606 GN=UTP20 PE=1 SV=3	NA	0.562379	1.47508	-0.661978	-0.912704	0.250726	1.22436	0.358375	1.81085	0.195249	0.46089	0.0519542	1.17629
O75717	WDHD1	WD repeat and HMG-box DNA-binding protein 1 OS=Homo sapiens OX=9606 GN=WDHD1 PE=1 SV=1	NA	-0.941298	-1.69805	-0.812773	0.756752	-1.56952	-0.128525	0.443551	1.10054	0.131177	0.260739	0.251933	0.0364591
O75821	EIF3G	Eukaryotic translation initiation factor 3 subunit G OS=Homo sapiens OX=9606 GN=EIF3G PE=1 SV=2	translation initiation factor (eIF)	1.79937	0.95464	NA	NA	NA	NA	2.02134	1.38077	NA	NA	NA	NA
O75821	EIF3G	Eukaryotic translation initiation factor 3 subunit G OS=Homo sapiens OX=9606 GN=EIF3G PE=1 SV=2	NA	NA	NA	1.10713	0.844729	0.262404	0.692236	NA	NA	0.400262	0.518636	0.046103	0.599865
O75822	EIF3J	Eukaryotic translation initiation factor 3 subunit J OS=Homo sapiens OX=9606 GN=EIF3J PE=1 SV=2	NA	0.187721	0.654458	-0.288135	-0.466737	0.178603	0.475856	0.154896	0.97199	0.122315	0.404951	0.0461368	0.464999
O76021	RSL1D1	Ribosomal L1 domain-containing protein 1 OS=Homo sapiens OX=9606 GN=RSL1D1 PE=1 SV=3	NA	0.671138	1.6652	-0.606495	-0.994059	0.387563	1.27763	0.607567	2.46056	0.246818	0.698401	0.120304	1.48159
O76075	DFFB	DNA fragmentation factor subunit beta OS=Homo sapiens OX=9606 GN=DFFB PE=1 SV=1	NA	1.82809	0.606915	0.0849141	1.22118	-1.13626	1.74318	1.05148	0.272548	0.0109997	0.444286	0.323164	1.24091
O76094	SRP72	Signal recognition particle subunit SRP72 OS=Homo sapiens OX=9606 GN=SRP72 PE=1 SV=3	NA	2.27487	2.5795	-0.287274	-0.304624	0.0173502	2.56215	2.78525	3.71217	0.0950999	0.221173	0.00503617	3.00026
O94761	RECQL4	ATP-dependent DNA helicase Q4 OS=Homo sapiens OX=9606 GN=RECQL4 PE=1 SV=2	NA	2.33682	2.29924	0.221671	0.0375846	0.184086	2.11515	0.639015	0.796666	0.00770647	0.00481845	0.008124	0.549739
O94776	MTA2	Metastasis-associated protein MTA2 OS=Homo sapiens OX=9606 GN=MTA2 PE=1 SV=1	NA	1.64506	2.56069	-0.276202	-0.915624	0.639422	1.92126	2.16975	3.71217	0.0574086	0.789629	0.125327	1.86088
O94832	MYO1D	Unconventional myosin-Id OS=Homo sapiens OX=9606 GN=MYO1D PE=1 SV=2	NA	0.796952	2.48483	-1.38098	-1.68788	0.306903	2.17793	0.725792	3.04314	0.752996	1.39956	0.0721191	2.37438
O94842	TOX4	TOX high mobility group box family member 4 OS=Homo sapiens OX=9606 GN=TOX4 PE=1 SV=1	NA	-1.20322	-0.652005	-0.573027	-0.551212	-0.0218146	-0.63019	0.61911	0.290065	0.0588973	0.0934337	0.00463192	0.255634
O94906	PRPF6	Pre-mRNA-processing factor 6 OS=Homo sapiens OX=9606 GN=PRPF6 PE=1 SV=1	NA	1.68919	2.31189	-0.471063	-0.622703	0.15164	2.16025	1.60784	2.61654	0.152528	0.444286	0.0282068	2.10234
O95251	KAT7	Histone acetyltransferase KAT7 OS=Homo sapiens OX=9606 GN=KAT7 PE=1 SV=1	NA	1.70049	1.80758	0.105002	-0.107089	0.212091	1.59549	2.08636	2.62769	0.0212566	0.0496339	0.0366268	1.57009
O95347	SMC2	Structural maintenance of chromosomes protein 2 OS=Homo sapiens OX=9606 GN=SMC2 PE=1 SV=2	NA	1.27628	1.02985	0.841496	0.246424	0.595072	0.434782	1.45874	1.17551	0.223391	0.142034	0.0721191	0.204343
O95391	SLU7	Pre-mRNA-splicing factor SLU7 OS=Homo sapiens OX=9606 GN=SLU7 PE=1 SV=2	NA	-0.781693	-0.403071	-1.00704	-0.378623	-0.628413	0.225342	0.310436	0.128934	0.209613	0.11577	0.0637958	0.0583828
O95433	AHSA1	Activator of 90 kDa heat shock protein ATPase homolog 1 OS=Homo sapiens OX=9606 GN=AHSA1 PE=1 SV=1	NA	1.09179	0.584985	0.315376	0.50681	-0.191434	0.776419	1.09881	0.444287	0.0598323	0.156011	0.0243878	0.666469
O95470	SGPL1	Sphingosine-1-phosphate lyase 1 OS=Homo sapiens OX=9606 GN=SGPL1 PE=1 SV=3	NA	1.43015	1.82256	0.18218	-0.392405	0.574585	1.24797	0.983231	1.66698	0.0382719	0.154276	0.229325	0.99649
O95478	NSA2	Ribosome biogenesis protein NSA2 homolog OS=Homo sapiens OX=9606 GN=NSA2 PE=1 SV=1	NA	0.182239	-0.0985719	0.520807	0.280811	0.239996	-0.338568	0.0892559	0.0644304	0.149038	0.10122	0.0612529	0.238157
O95573	ACSL3	Long-chain-fatty-acid--CoA ligase 3 OS=Homo sapiens OX=9606 GN=ACSL3 PE=1 SV=3	NA	1.33247	1.1694	0.0541161	0.163075	-0.108959	1.27836	0.521538	0.784228	0.00407757	0.0206111	0.0141056	0.820686
O95602	POLR1A	DNA-directed RNA polymerase I subunit RPA1 OS=Homo sapiens OX=9606 GN=POLR1A PE=1 SV=2	NA	1.87437	0.386336	1.36089	1.48804	-0.127148	0.513484	1.50126	0.140084	0.298483	0.417408	0.0127368	0.215793
O95625	ZBTB11	Zinc finger and BTB domain-containing protein 11 OS=Homo sapiens OX=9606 GN=ZBTB11 PE=1 SV=2	NA	-0.750633	-0.147971	-1.45207	-0.602661	-0.849411	0.70144	0.743377	0.108466	0.497082	0.409869	0.178136	0.465675
O95696	BRD1	Bromodomain-containing protein 1 OS=Homo sapiens OX=9606 GN=BRD1 PE=1 SV=1	NA	1.94042	1.94839	-0.178831	-0.00797513	-0.170856	2.11925	1.75284	1.95856	0.0486485	0.00484877	0.037936	1.98558
O95707	POP4	Ribonuclease P protein subunit p29 OS=Homo sapiens OX=9606 GN=POP4 PE=1 SV=2	NA	0.487053	1.44613	-0.170602	-0.959073	0.788471	0.657655	0.370593	1.63196	0.0332432	0.628193	0.126505	0.382299
O95757	HSPA4L	Heat shock 70 kDa protein 4L OS=Homo sapiens OX=9606 GN=HSPA4L PE=1 SV=3	NA	1.28257	0.983562	0.539438	0.29901	0.240428	0.743134	1.5874	0.928286	0.235369	0.107877	0.037936	0.773602
O95782	AP2A1	AP-2 complex subunit alpha-1 OS=Homo sapiens OX=9606 GN=AP2A1 PE=1 SV=3	NA	0.80502	0.466181	0.0167811	0.338839	-0.322058	0.788239	0.703271	0.268329	0.00407757	0.104037	0.037936	0.569103
O95819	MAP4K4	Mitogen-activated protein kinase kinase kinase kinase 4 OS=Homo sapiens OX=9606 GN=MAP4K4 PE=1 SV=2	NA	2.03764	1.32229	0.294616	0.71535	-0.420734	1.74302	2.2647	1.8579	0.0843618	0.444286	0.095039	2.04674
O95831	AIFM1	Apoptosis-inducing factor 1, mitochondrial OS=Homo sapiens OX=9606 GN=AIFM1 PE=1 SV=1	NA	1.01042	0.832843	0.0179441	0.177579	-0.159635	0.992478	0.484377	0.370489	0.00407757	0.0327374	0.0227262	0.567678
O96013	PAK4	Serine/threonine-protein kinase PAK 4 OS=Homo sapiens OX=9606 GN=PAK4 PE=1 SV=1	NA	0.531065	0.642839	-0.362016	-0.111774	-0.250242	0.893081	0.288386	0.360865	0.116079	0.0340794	0.0381978	0.591689
O96028	NSD2	Histone-lysine N-methyltransferase NSD2 OS=Homo sapiens OX=9606 GN=NSD2 PE=1 SV=1	NA	1.48987	1.66434	-0.0819569	-0.174467	0.0925104	1.57183	1.73054	2.15263	0.017791	0.0974324	0.0228278	1.57831
P00338	LDHA	L-lactate dehydrogenase A chain OS=Homo sapiens OX=9606 GN=LDHA PE=1 SV=2	NA	-0.00554119	0.188523	0.844965	-0.194065	1.03903	-0.850506	0.00168776	0.0966376	0.230555	0.0424993	0.19389	0.689861
P00367	GLUD1	Glutamate dehydrogenase 1, mitochondrial OS=Homo sapiens OX=9606 GN=GLUD1 PE=1 SV=2	NA	1.6272	0.907231	0.337976	0.719965	-0.381989	1.28922	2.18681	1.38595	0.125591	0.663464	0.0921889	1.46869
P00492	HPRT1	Hypoxanthine-guanine phosphoribosyltransferase OS=Homo sapiens OX=9606 GN=HPRT1 PE=1 SV=2	NA	-0.950021	-0.352222	-0.663851	-0.597799	-0.0660513	-0.28617	0.962091	0.335085	0.261989	0.41413	0.0165084	0.195225
P00558	PGK1	Phosphoglycerate kinase 1 OS=Homo sapiens OX=9606 GN=PGK1 PE=1 SV=3	NA	1.03213	1.0059	-0.0440615	0.0262277	-0.0702893	1.07619	0.988871	0.844147	0.00517611	0.00747037	0.0106635	0.941048
P00761 SWISS-PROT:P00761	NA	Trypsin - Sus scrofa (Pig).	NA	-0.0616003	0.202993	-0.34843	-0.264593	-0.0838368	0.28683	0.0427372	0.195921	0.124417	0.153934	0.0209788	0.208332
P00918	CA2	Carbonic anhydrase 2 OS=Homo sapiens OX=9606 GN=CA2 PE=1 SV=2	NA	0.869828	0.200021	0.0334196	0.669807	-0.636388	0.836408	0.524946	0.0964418	0.00407757	0.199094	0.0677251	0.46969
P00966	ASS1	Argininosuccinate synthase OS=Homo sapiens OX=9606 GN=ASS1 PE=1 SV=2	NA	0.430006	-0.149373	0.438588	0.579379	-0.14079	-0.00858277	0.228472	0.0523514	0.0573886	0.210679	0.0127368	0.00245889
P02452	COL1A1	Collagen alpha-1(I) chain OS=Homo sapiens OX=9606 GN=COL1A1 PE=1 SV=5	NA	0.573962	0.920277	-0.536503	-0.346315	-0.190188	1.11047	0.150245	0.290217	0.211857	0.25565	0.037936	0.376504
P02533	KRT14	Keratin, type I cytoskeletal 14 OS=Homo sapiens OX=9606 GN=KRT14 PE=1 SV=4	NA	0.474676	-0.0857106	0.987873	0.560387	0.427486	-0.513197	0.251053	0.0244253	0.350799	0.127826	0.0396194	0.290842
P02538	NA	SWISS-PROT:P02538 Tax_Id=9606 Gene_Symbol=KRT6A Keratin, type II cytoskeletal 6A	NA	0.739057	-0.627718	0.733735	1.36677	-0.633039	0.00532191	0.516239	0.283169	0.312649	0.52346	0.0713647	0.00245889
P02545	LMNA	Prelamin-A/C OS=Homo sapiens OX=9606 GN=LMNA PE=1 SV=1	NA	-1.39846	-0.641393	-1.06493	-0.757068	-0.307859	-0.333534	0.550295	0.316217	0.150231	0.118289	0.0299878	0.195225
P02768-1	NA	SWISS-PROT:P02768-1 Tax_Id=9606 Gene_Symbol=ALB Isoform 1 of Serum albumin precursor	NA	-0.716149	-1.3841	-0.0512576	0.667948	-0.719206	-0.664891	0.467523	1.41979	0.00724252	0.277456	0.251933	0.568679
P02786	TFRC	Transferrin receptor protein 1 OS=Homo sapiens OX=9606 GN=TFRC PE=1 SV=2	NA	0.600997	1.82992	-0.28966	-1.22892	0.939261	0.890658	0.428256	1.36265	0.0510067	0.49368	0.125327	0.568466
P04075	ALDOA	Fructose-bisphosphate aldolase A OS=Homo sapiens OX=9606 GN=ALDOA PE=1 SV=2	NA	0.176854	-0.705159	-0.0477634	0.882014	-0.929777	0.224618	0.0892559	0.766974	0.00517611	0.450558	0.251933	0.112847
P04083	ANXA1	Annexin A1 OS=Homo sapiens OX=9606 GN=ANXA1 PE=1 SV=2	NA	0.205452	-0.280997	1.01157	0.486449	0.525125	-0.806122	0.102641	0.160884	0.151577	0.277103	0.0396194	0.284355
P04181	OAT	Ornithine aminotransferase, mitochondrial OS=Homo sapiens OX=9606 GN=OAT PE=1 SV=1	NA	1.04242	0.126959	-0.0521221	0.915465	-0.967587	1.09455	0.600984	0.0461972	0.00991918	0.614673	0.312137	0.646297
P04259	KRT6B	Keratin, type II cytoskeletal 6B OS=Homo sapiens OX=9606 GN=KRT6B PE=1 SV=5	NA	1.47796	1.07321	-0.0157209	0.404756	-0.420477	1.49368	1.36728	0.736345	0.00407757	0.137649	0.0675567	1.41264
P04264	KRT1	Keratin, type II cytoskeletal 1 OS=Homo sapiens OX=9606 GN=KRT1 PE=1 SV=6	NA	-0.358919	-0.411986	-0.125478	0.0530668	-0.178545	-0.23344	0.222701	0.215443	0.0150688	0.0133293	0.0227262	0.0984331
P04350	TUBB4A	Tubulin beta-4A chain OS=Homo sapiens OX=9606 GN=TUBB4A PE=1 SV=2	NA	0.978996	0.703511	-0.0629725	0.275484	-0.338457	1.04197	0.909534	0.711835	0.00770647	0.154276	0.0448875	0.683803
P04406	GAPDH	Glyceraldehyde-3-phosphate dehydrogenase OS=Homo sapiens OX=9606 GN=GAPDH PE=1 SV=3	NA	1.1062	0.457944	0.357616	0.648253	-0.290637	0.748581	1.24313	0.552232	0.0859351	0.428895	0.0461368	0.592487
P04637	TP53	Cellular tumor antigen p53 OS=Homo sapiens OX=9606 GN=TP53 PE=1 SV=4	NA	1.56841	0.538358	-0.426738	1.03005	-1.45679	1.99515	1.46685	0.465191	0.149038	0.698401	1.02505	2.13488
P04818	TYMS	Thymidylate synthase OS=Homo sapiens OX=9606 GN=TYMS PE=1 SV=3	NA	-0.825155	1.45774	-2.0008	-2.2829	0.282094	1.17565	0.419425	0.816331	0.316912	0.663464	0.0228278	0.484393
P04843	RPN1	Dolichyl-diphosphooligosaccharide--protein glycosyltransferase subunit 1 OS=Homo sapiens OX=9606 GN=RPN1 PE=1 SV=1	NA	0.948816	0.31739	0.753793	0.631426	0.122367	0.195023	0.607567	0.168168	0.230555	0.41413	0.0228278	0.0783252
P05023	ATP1A1	Sodium/potassium-transporting ATPase subunit alpha-1 OS=Homo sapiens OX=9606 GN=ATP1A1 PE=1 SV=1	NA	0.355715	1.09212	-0.211903	-0.736406	0.524503	0.567618	0.148787	0.867158	0.0382719	0.298524	0.128484	0.350056
P05089	ARG1	Arginase-1 OS=Homo sapiens OX=9606 GN=ARG1 PE=1 SV=2	NA	1.38834	1.33513	-1.50221	0.0532119	-1.55542	2.89055	0.765582	0.75772	0.386929	0.00987713	0.312137	2.27332
P05090	APOD	Apolipoprotein D OS=Homo sapiens OX=9606 GN=APOD PE=1 SV=1	NA	1.09185	0.834262	-0.0387297	0.257589	-0.296318	1.13058	0.4457	0.34904	0.00517611	0.107261	0.0633129	0.51098
P05141	SLC25A5	ADP/ATP translocase 2 OS=Homo sapiens OX=9606 GN=SLC25A5 PE=1 SV=7	NA	0.818076	1.65424	-0.499939	-0.836165	0.336226	1.31801	1.01257	2.47051	0.191557	0.598131	0.0675567	1.54267
P05198	EIF2S1	Eukaryotic translation initiation factor 2 subunit 1 OS=Homo sapiens OX=9606 GN=EIF2S1 PE=1 SV=3	translation initiation factor (eIF)	NA	2.57023	NA	NA	NA	2.59154	NA	2.39972	NA	NA	NA	2.75377
P05198	EIF2S1	Eukaryotic translation initiation factor 2 subunit 1 OS=Homo sapiens OX=9606 GN=EIF2S1 PE=1 SV=3	NA	1.54075	NA	-1.05079	-1.02948	-0.0213104	NA	1.26107	NA	0.341926	0.397409	0.0049824	NA
P05386	RPLP1	60S acidic ribosomal protein P1 OS=Homo sapiens OX=9606 GN=RPLP1 PE=1 SV=1	NA	1.6634	1.40896	-0.368813	0.254444	-0.623257	2.03221	1.20449	1.85277	0.0574086	0.0624068	0.134158	2.02349
P05387	RPLP2	60S acidic ribosomal protein P2 OS=Homo sapiens OX=9606 GN=RPLP2 PE=1 SV=1	NA	0.232956	0.383084	-0.6716	-0.150128	-0.521472	0.904556	0.0791982	0.214667	0.125591	0.0215925	0.0782462	0.889865
P05388	RPLP0	60S acidic ribosomal protein P0 OS=Homo sapiens OX=9606 GN=RPLP0 PE=1 SV=1	NA	1.05365	1.20875	-0.373311	-0.155102	-0.218209	1.42696	1.36683	1.58734	0.073818	0.0632769	0.0261385	1.05509
P05455	SSB	Lupus La protein OS=Homo sapiens OX=9606 GN=SSB PE=1 SV=2	NA	-0.509537	-0.630799	-0.158738	0.121262	-0.28	-0.350799	0.572335	0.716381	0.0382719	0.0485331	0.0448875	0.24502
P05783	KRT18	Keratin, type I cytoskeletal 18 OS=Homo sapiens OX=9606 GN=KRT18 PE=1 SV=2	NA	0.456692	-0.171295	1.41656	0.627988	0.788573	-0.959868	0.342985	0.103533	0.246818	0.406433	0.0675567	0.374331
P05787	NA	SWISS-PROT:P05787 Tax_Id=9606 Gene_Symbol=KRT8 Keratin, type II cytoskeletal 8	NA	0.493915	-0.218259	0.909532	0.712174	0.197358	-0.415616	0.355478	0.142915	0.244545	0.363985	0.0243878	0.208332
P06493	CDK1	Cyclin-dependent kinase 1 OS=Homo sapiens OX=9606 GN=CDK1 PE=1 SV=3	NA	1.61428	1.89446	0.0834114	-0.280177	0.363588	1.53087	1.60784	2.53962	0.0150688	0.126541	0.0788192	1.62664
P06576	ATP5F1B	ATP synthase subunit beta, mitochondrial OS=Homo sapiens OX=9606 GN=ATP5F1B PE=1 SV=3	NA	2.32271	2.18219	0.672318	0.140523	0.531795	1.65039	1.3737	1.32821	0.246818	0.0553001	0.120304	0.92653
P06733	ENO1	Alpha-enolase OS=Homo sapiens OX=9606 GN=ENO1 PE=1 SV=2	NA	0.565246	-0.083981	0.199505	0.649227	-0.449722	0.365741	0.516239	0.0726398	0.0416387	0.428625	0.120304	0.274356
P06737	PYGL	Glycogen phosphorylase, liver form OS=Homo sapiens OX=9606 GN=PYGL PE=1 SV=4	NA	0.403377	0.186007	-0.0680589	0.217369	-0.285428	0.471436	0.281967	0.0966376	0.0150688	0.0720872	0.0461368	0.338093
P06744	GPI	Glucose-6-phosphate isomerase OS=Homo sapiens OX=9606 GN=GPI PE=1 SV=4	NA	0.303138	-0.400143	0.519027	0.703281	-0.184254	-0.215889	0.165045	0.370143	0.134042	0.316739	0.0334519	0.133599
P06748	NPM1	Nucleophosmin OS=Homo sapiens OX=9606 GN=NPM1 PE=1 SV=2	NA	0.327265	-0.207895	0.437191	0.53516	-0.0979694	-0.109925	0.177622	0.136525	0.124417	0.247758	0.0228278	0.0566156
P07195	LDHB	L-lactate dehydrogenase B chain OS=Homo sapiens OX=9606 GN=LDHB PE=1 SV=2	NA	1.34734	1.18946	0.282952	0.157878	0.125074	1.06439	1.60392	1.39795	0.0805534	0.0553001	0.0228278	1.12575
P07305	H1-0	Histone H1.0 OS=Homo sapiens OX=9606 GN=H1-0 PE=1 SV=3	NA	-1.88969	-1.503	-1.55294	-0.386696	-1.16624	-0.336755	1.4672	1.56536	0.47964	0.113542	0.357406	0.209595
P07355	ANXA2	Annexin A2 OS=Homo sapiens OX=9606 GN=ANXA2 PE=1 SV=2	NA	0.0464759	-2.69957	1.81148	2.74605	-0.934571	-1.765	0.0246741	0.96584	0.497082	0.495138	0.0519029	1.41015
P07437	TUBB	Tubulin beta chain OS=Homo sapiens OX=9606 GN=TUBB PE=1 SV=2	NA	1.56682	1.2746	-0.065354	0.292224	-0.357578	1.63218	1.84595	1.7098	0.00991918	0.126541	0.0612529	1.62664
P07741	APRT	Adenine phosphoribosyltransferase OS=Homo sapiens OX=9606 GN=APRT PE=1 SV=2	NA	2.90939	2.17743	0.203551	0.731967	-0.528416	2.70584	2.92805	2.90921	0.0400801	0.444286	0.103078	2.8362
P07814	EPRS	Bifunctional glutamate/proline--tRNA ligase OS=Homo sapiens OX=9606 GN=EPRS PE=1 SV=5	NA	1.31997	3.0081	-1.18881	-1.68813	0.499318	2.50878	1.35204	3.42388	0.277897	0.948188	0.0602307	1.84358
P07900	HSP90AA1	Heat shock protein HSP 90-alpha OS=Homo sapiens OX=9606 GN=HSP90AA1 PE=1 SV=5	NA	0.877237	0.34815	-0.178786	0.529088	-0.707874	1.05602	0.899758	0.274196	0.0348945	0.199094	0.108251	0.946585
P07910	HNRNPC	Heterogeneous nuclear ribonucleoproteins C1/C2 OS=Homo sapiens OX=9606 GN=HNRNPC PE=1 SV=4	NA	0.146687	-0.163655	-0.319391	0.310342	-0.629733	0.466078	0.0862042	0.114539	0.0882983	0.174121	0.165903	0.307161
P08123	COL1A2	Collagen alpha-2(I) chain OS=Homo sapiens OX=9606 GN=COL1A2 PE=1 SV=7	NA	1.5632	1.59778	-0.145753	-0.0345794	-0.111174	1.70896	0.743587	0.805737	0.0382719	0.0154241	0.0228278	0.879947
P08133	ANXA6	Annexin A6 OS=Homo sapiens OX=9606 GN=ANXA6 PE=1 SV=3	NA	-0.282432	0.584566	1.09733	-0.866998	1.96433	-1.37976	0.147548	0.380845	0.0888302	0.357002	0.120304	0.334088
P08195	SLC3A2	4F2 cell-surface antigen heavy chain OS=Homo sapiens OX=9606 GN=SLC3A2 PE=1 SV=3	NA	1.35258	0.920905	1.19129	0.431675	0.759618	0.161287	1.65722	0.951677	0.510036	0.201243	0.170323	0.0957703
P08237	PFKM	ATP-dependent 6-phosphofructokinase, muscle type OS=Homo sapiens OX=9606 GN=PFKM PE=1 SV=2	NA	-0.482562	-0.412847	-0.463198	-0.0697144	-0.393484	-0.0193634	0.365555	0.285884	0.138568	0.0173201	0.0675567	0.0100172
P08238	HSP90AB1	Heat shock protein HSP 90-beta OS=Homo sapiens OX=9606 GN=HSP90AB1 PE=1 SV=4	NA	1.16614	0.543043	0.263258	0.623096	-0.359839	0.902882	1.41382	0.579444	0.0472321	0.36554	0.0488167	0.689774
P08243	ASNS	Asparagine synthetase [glutamine-hydrolyzing] OS=Homo sapiens OX=9606 GN=ASNS PE=1 SV=4	NA	1.00456	2.24778	-1.23768	-1.24322	0.00553729	2.24224	0.743377	3.05255	0.400262	0.598131	0.00447354	2.62885
P08559	PDHA1	Pyruvate dehydrogenase E1 component subunit alpha, somatic form, mitochondrial OS=Homo sapiens OX=9606 GN=PDHA1 PE=1 SV=3	NA	0.549077	0.324892	-0.0843403	0.224185	-0.308525	0.633418	0.337696	0.163853	0.0158943	0.0773075	0.0461368	0.388251
P08579	SNRPB2	U2 small nuclear ribonucleoprotein B'' OS=Homo sapiens OX=9606 GN=SNRPB2 PE=1 SV=1	NA	-0.870788	-1.19574	0.173001	0.324955	-0.151954	-1.04379	0.540979	0.970896	0.0348889	0.104037	0.0243878	0.748846
P08590	MYL3	Myosin light chain 3 OS=Homo sapiens OX=9606 GN=MYL3 PE=1 SV=3	NA	1.19555	0.963206	0.346658	0.232342	0.114316	0.84889	1.16548	0.75332	0.0382719	0.0631207	0.0106635	0.323393
P08621	SNRNP70	U1 small nuclear ribonucleoprotein 70 kDa OS=Homo sapiens OX=9606 GN=SNRNP70 PE=1 SV=2	NA	-1.58168	-2.71165	1.25845	1.12997	0.128487	-2.84013	1.63908	3.05082	0.428393	0.666346	0.0228278	2.68595
P08670	VIM	Vimentin OS=Homo sapiens OX=9606 GN=VIM PE=1 SV=4	NA	-0.626336	-0.796662	0.82618	0.170326	0.655854	-1.45252	0.527514	1.13587	0.189955	0.0631207	0.0899111	1.03311
P08708	RPS17	40S ribosomal protein S17 OS=Homo sapiens OX=9606 GN=RPS17 PE=1 SV=2	NA	0.934055	-0.233126	1.06603	1.16718	-0.101156	-0.131971	0.611123	0.0953153	0.316912	0.425436	0.0127368	0.0559135
P08758	ANXA5	Annexin A5 OS=Homo sapiens OX=9606 GN=ANXA5 PE=1 SV=2	NA	1.32174	1.66072	0.247904	-0.338976	0.58688	1.07384	1.48661	2.65348	0.0433275	0.139062	0.108251	0.992903
P08779	NA	SWISS-PROT:P08779 Tax_Id=9606 Gene_Symbol=KRT16 Keratin, type I cytoskeletal 16	NA	0.209152	-0.847699	0.50398	1.05685	-0.55287	-0.294828	0.102641	0.352934	0.149038	0.277456	0.0519615	0.159177
P08865	RPSA	40S ribosomal protein SA OS=Homo sapiens OX=9606 GN=RPSA PE=1 SV=4	NA	0.977424	0.155984	0.00796319	0.821441	-0.813477	0.969461	1.14542	0.128243	0.00363635	0.581299	0.303252	1.03255
P09001	MRPL3	39S ribosomal protein L3, mitochondrial OS=Homo sapiens OX=9606 GN=MRPL3 PE=1 SV=1	NA	2.86075	1.54279	2.05813	1.31795	0.740177	0.802615	2.92805	1.30927	0.538364	0.628193	0.0675567	0.400768
P09132	SRP19	Signal recognition particle 19 kDa protein OS=Homo sapiens OX=9606 GN=SRP19 PE=1 SV=3	NA	-0.0965826	-0.129748	0.289612	0.0331652	0.256447	-0.386194	0.0367473	0.0545161	0.0816559	0.0120649	0.0461368	0.194868
P09211	GSTP1	Glutathione S-transferase P OS=Homo sapiens OX=9606 GN=GSTP1 PE=1 SV=2	NA	0.854385	0.219326	-0.412579	0.635059	-1.04764	1.26696	0.738976	0.06844	0.0944472	0.137649	0.0997566	0.899519
P09429	HMGB1	High mobility group protein B1 OS=Homo sapiens OX=9606 GN=HMGB1 PE=1 SV=3	NA	-2.00059	-2.45069	0.854	0.4501	0.4039	-2.85459	2.06452	3.0633	0.376787	0.261742	0.124596	3.11208
P09651	HNRNPA1	Heterogeneous nuclear ribonucleoprotein A1 OS=Homo sapiens OX=9606 GN=HNRNPA1 PE=1 SV=5	NA	-1.21218	-2.15017	-0.299726	0.937992	-1.23772	-0.912457	1.29342	3.0633	0.0872027	0.636905	0.717047	0.974813
P09661	SNRPA1	U2 small nuclear ribonucleoprotein A' OS=Homo sapiens OX=9606 GN=SNRPA1 PE=1 SV=2	NA	-1.45316	-1.7076	-0.117053	0.254435	-0.371488	-1.33611	1.35294	0.654223	0.00991918	0.034042	0.0228278	0.615294
P09874	PARP1	Poly [ADP-ribose] polymerase 1 OS=Homo sapiens OX=9606 GN=PARP1 PE=1 SV=4	NA	0.488724	1.30244	-0.303532	-0.813715	0.510184	0.792256	0.429228	1.71369	0.0872027	0.49368	0.120304	0.763683
P09884	POLA1	DNA polymerase alpha catalytic subunit OS=Homo sapiens OX=9606 GN=POLA1 PE=1 SV=2	NA	0.737017	0.495896	0.347647	0.241121	0.106526	0.389371	0.607567	0.366686	0.0510067	0.0642484	0.0127368	0.187855
P09960	LTA4H	Leukotriene A-4 hydrolase OS=Homo sapiens OX=9606 GN=LTA4H PE=1 SV=2	NA	1.22964	0.904359	0.134653	0.325283	-0.190631	1.09499	0.741487	0.650561	0.0215198	0.101131	0.0282068	0.760028
P09972	ALDOC	Fructose-bisphosphate aldolase C OS=Homo sapiens OX=9606 GN=ALDOC PE=1 SV=2	NA	-0.000246852	0.0322455	-0.243497	-0.0324924	-0.211005	0.24325	0.000173458	0.0158544	0.0777073	0.0154241	0.0461368	0.134294
P0DMV9	HSPA1B	Heat shock 70 kDa protein 1B OS=Homo sapiens OX=9606 GN=HSPA1B PE=1 SV=1	NA	0.0376237	-0.536895	0.173955	0.574519	-0.400564	-0.136331	0.0257538	0.671903	0.0382719	0.410622	0.0713647	0.084694
P0DN79	CBSL	Cystathionine beta-synthase-like protein OS=Homo sapiens OX=9606 GN=CBSL PE=1 SV=1	NA	0.880023	1.28096	-0.531257	-0.400937	-0.13032	1.41128	0.392076	1.02224	0.0950999	0.101296	0.0261385	1.10047
P10412	H1-4	Histone H1.4 OS=Homo sapiens OX=9606 GN=H1-4 PE=1 SV=2	NA	-1.70157	-1.28443	-0.0431049	-0.417141	0.374036	-1.65847	0.722276	0.552376	0.00407757	0.152161	0.046103	0.70528
P10636	MAPT	Microtubule-associated protein tau OS=Homo sapiens OX=9606 GN=MAPT PE=1 SV=5	NA	0.476808	1.06992	-0.548546	-0.593114	0.0445674	1.02535	0.22595	0.914793	0.129353	0.210641	0.00903387	0.782379
P10768	ESD	S-formylglutathione hydrolase OS=Homo sapiens OX=9606 GN=ESD PE=1 SV=2	NA	1.10952	0.925008	0.149509	0.184513	-0.0350031	0.960011	0.885663	0.861072	0.027988	0.0496339	0.00503617	0.791873
P10809	HSPD1	60 kDa heat shock protein, mitochondrial OS=Homo sapiens OX=9606 GN=HSPD1 PE=1 SV=2	NA	0.965553	0.20457	0.576058	0.760982	-0.184924	0.389495	0.854018	0.178373	0.151549	0.409869	0.0312719	0.269207
P10909	CLU	Clusterin OS=Homo sapiens OX=9606 GN=CLU PE=1 SV=1	NA	1.52515	1.57294	0.318033	-0.0477861	0.365819	1.20712	0.854018	0.994692	0.0947977	0.0167422	0.103273	0.698989
P10916	MYL2	Myosin regulatory light chain 2, ventricular/cardiac muscle isoform OS=Homo sapiens OX=9606 GN=MYL2 PE=1 SV=3	NA	0.106942	-0.518091	1.12249	0.625032	0.497453	-1.01554	0.0469103	0.407625	0.220286	0.279254	0.0461368	0.489852
P11021	HSPA5	Endoplasmic reticulum chaperone BiP OS=Homo sapiens OX=9606 GN=HSPA5 PE=1 SV=2	NA	0.816939	0.0998224	0.759527	0.717117	0.0424103	0.0574122	0.495178	0.0551973	0.151549	0.341442	0.00503617	0.0225835
P11142	HSPA8	Heat shock cognate 71 kDa protein OS=Homo sapiens OX=9606 GN=HSPA8 PE=1 SV=1	NA	0.323153	-0.512651	0.421589	0.835804	-0.414215	-0.0984356	0.225582	0.356099	0.126528	0.339018	0.0675567	0.0572417
P11171	EPB41	Protein 4.1 OS=Homo sapiens OX=9606 GN=EPB41 PE=1 SV=4	NA	-1.20281	-0.738856	-0.835776	-0.463955	-0.371821	-0.367036	0.703271	0.753088	0.197427	0.132662	0.0934944	0.237633
P11172	UMPS	Uridine 5'-monophosphate synthase OS=Homo sapiens OX=9606 GN=UMPS PE=1 SV=1	NA	0.465411	-0.277078	0.0197106	0.742489	-0.722779	0.4457	0.457445	0.154287	0.00407757	0.291077	0.126505	0.42353
P11387	TOP1	DNA topoisomerase 1 OS=Homo sapiens OX=9606 GN=TOP1 PE=1 SV=2	NA	0.0552687	0.374054	-0.575055	-0.318785	-0.25627	0.630324	0.0379717	0.352934	0.191621	0.175164	0.037936	0.482076
P11388	TOP2A	DNA topoisomerase 2-alpha OS=Homo sapiens OX=9606 GN=TOP2A PE=1 SV=3	NA	0.161881	1.02814	-0.953529	-0.866263	-0.087266	1.11541	0.117689	1.37594	0.463357	0.53687	0.0228278	1.41264
P11413	G6PD	Glucose-6-phosphate 1-dehydrogenase OS=Homo sapiens OX=9606 GN=G6PD PE=1 SV=4	NA	1.0361	1.59307	2.54508	-0.556972	3.10205	-1.50899	0.55391	0.834698	0.41863	0.156011	0.357406	0.50218
P11498	PC	Pyruvate carboxylase, mitochondrial OS=Homo sapiens OX=9606 GN=PC PE=1 SV=2	NA	0.825515	0.558788	1.03927	0.266726	0.772542	-0.213754	0.670629	0.430328	0.315161	0.133122	0.134158	0.09457
P11586	MTHFD1	C-1-tetrahydrofolate synthase, cytoplasmic OS=Homo sapiens OX=9606 GN=MTHFD1 PE=1 SV=3	NA	0.0236107	0.287476	-0.66983	-0.263865	-0.405964	0.69344	0.0118241	0.225079	0.314893	0.137649	0.120304	0.63663
P11940	PABPC1	Polyadenylate-binding protein 1 OS=Homo sapiens OX=9606 GN=PABPC1 PE=1 SV=2	NA	-1.96727	-1.16228	-2.20333	-0.80499	-1.39834	0.236058	1.61243	0.861072	0.67779	0.265386	0.262545	0.106091
P12004	PCNA	Proliferating cell nuclear antigen OS=Homo sapiens OX=9606 GN=PCNA PE=1 SV=1	NA	1.51872	1.31986	0.712615	0.198866	0.513748	0.806108	1.79887	1.44032	0.163679	0.0609893	0.0675567	0.53611
P12081	HARS	Histidine--tRNA ligase, cytoplasmic OS=Homo sapiens OX=9606 GN=HARS PE=1 SV=2	NA	0.784681	0.420816	-0.610199	0.363865	-0.974064	1.39488	0.720555	0.196996	0.280774	0.101131	0.168302	1.41036
P12236	SLC25A6	ADP/ATP translocase 3 OS=Homo sapiens OX=9606 GN=SLC25A6 PE=1 SV=4	NA	0.989882	1.92384	-0.023779	-0.933957	0.910178	1.01366	1.28447	3.22706	0.00407757	0.789629	0.357406	1.078
P12268	IMPDH2	Inosine-5'-monophosphate dehydrogenase 2 OS=Homo sapiens OX=9606 GN=IMPDH2 PE=1 SV=2	NA	-0.0336644	-1.47461	0.417444	1.44095	-1.02351	-0.451108	0.014905	1.78828	0.0833317	0.790026	0.251933	0.255722
P12277	CKB	Creatine kinase B-type OS=Homo sapiens OX=9606 GN=CKB PE=1 SV=1	NA	1.32926	0.212655	0.974911	1.1166	-0.141689	0.354344	1.66541	0.211365	0.415738	0.892366	0.0265969	0.255634
P12883	MYH7	Myosin-7 OS=Homo sapiens OX=9606 GN=MYH7 PE=1 SV=5	NA	-0.0739773	0.0116444	-0.0064104	-0.0856216	0.0792112	-0.0675669	0.0343003	0.00450198	0.00304612	0.0416537	0.0141056	0.029621
P12956	XRCC6	X-ray repair cross-complementing protein 6 OS=Homo sapiens OX=9606 GN=XRCC6 PE=1 SV=2	NA	-0.113777	1.51028	-0.787051	-1.62406	0.837005	0.673273	0.0769359	2.20057	0.312649	1.39956	0.297559	0.579264
P13010	XRCC5	X-ray repair cross-complementing protein 5 OS=Homo sapiens OX=9606 GN=XRCC5 PE=1 SV=3	NA	1.30788	1.287	-0.244141	0.0208785	-0.265019	1.55202	1.60513	1.36554	0.0382719	0.00811579	0.0261385	1.01508
P13073	COX4I1	Cytochrome c oxidase subunit 4 isoform 1, mitochondrial OS=Homo sapiens OX=9606 GN=COX4I1 PE=1 SV=1	NA	0.728008	1.43262	-0.127211	-0.704609	0.577398	0.855219	0.512176	1.51508	0.0332432	0.425436	0.195563	0.697144
P13489	RNH1	Ribonuclease inhibitor OS=Homo sapiens OX=9606 GN=RNH1 PE=1 SV=2	NA	0.556596	1.2149	-0.872271	-0.6583	-0.213971	1.42887	0.32474	1.21434	0.259698	0.316739	0.0375083	1.19026
P13533	MYH6	Myosin-6 OS=Homo sapiens OX=9606 GN=MYH6 PE=1 SV=5	NA	-0.518308	0.105112	0.221357	-0.62342	0.844778	-0.739665	0.445519	0.094929	0.0348889	0.410622	0.120304	0.391853
P13639	EEF2	Elongation factor 2 OS=Homo sapiens OX=9606 GN=EEF2 PE=1 SV=4	NA	0.151723	-0.015116	-0.203053	0.166839	-0.369892	0.354776	0.0590563	0.00781174	0.0348889	0.0416537	0.0677251	0.211112
P13645	NA	SWISS-PROT:P13645 Tax_Id=9606 Gene_Symbol=KRT10 Keratin, type I cytoskeletal 10	NA	-0.690003	-0.404897	0.253589	-0.285106	0.538695	-0.943592	0.567183	0.250693	0.0382719	0.0784295	0.0675567	0.668837
P13646-1	NA	SWISS-PROT:P13646-1 Tax_Id=9606 Gene_Symbol=KRT13 Isoform 1 of Keratin, type I cytoskeletal 13	NA	-0.104558	0.346951	0.624339	-0.451509	1.07585	-0.728897	0.0590563	0.365999	0.0574086	0.210679	0.0713647	0.210316
P13647	NA	SWISS-PROT:P13647 Tax_Id=9606 Gene_Symbol=KRT5 Keratin, type II cytoskeletal 5	NA	0.628981	-0.128501	0.467536	0.757481	-0.289946	0.161445	0.490754	0.0609564	0.135786	0.310551	0.037936	0.0866766
P13667	PDIA4	Protein disulfide-isomerase A4 OS=Homo sapiens OX=9606 GN=PDIA4 PE=1 SV=2	NA	0.502353	1.018	-0.338187	-0.515646	0.177459	0.840541	0.607567	1.79088	0.0931617	0.428895	0.0265969	0.758057
P13804	ETFA	Electron transfer flavoprotein subunit alpha, mitochondrial OS=Homo sapiens OX=9606 GN=ETFA PE=1 SV=1	NA	-0.0796638	-1.28951	0.944839	1.20984	-0.265003	-1.0245	0.0412229	1.41389	0.211857	0.646075	0.0265969	0.621928
P14618	PKM	Pyruvate kinase PKM OS=Homo sapiens OX=9606 GN=PKM PE=1 SV=4	NA	2.66283	2.20753	0.27489	0.455301	-0.180411	2.38794	2.92805	3.23703	0.0574086	0.278375	0.0265969	2.44626
P14625	HSP90B1	Endoplasmin OS=Homo sapiens OX=9606 GN=HSP90B1 PE=1 SV=1	NA	1.76272	1.18561	0.139557	0.577109	-0.437552	1.62317	1.11283	0.726122	0.02584	0.23042	0.0675567	1.03255
P14635	CCNB1	G2/mitotic-specific cyclin-B1 OS=Homo sapiens OX=9606 GN=CCNB1 PE=1 SV=1	NA	-0.934393	0.506797	-1.67234	-1.44119	-0.231152	0.737949	1.00344	0.558473	0.81468	1.07649	0.0461368	0.697149
P14866	HNRNPL	Heterogeneous nuclear ribonucleoprotein L OS=Homo sapiens OX=9606 GN=HNRNPL PE=1 SV=2	NA	1.09075	0.44167	-0.189227	0.649084	-0.838311	1.27998	0.988628	0.410518	0.0382719	0.401583	0.297559	1.17629
P14868	DARS	Aspartate--tRNA ligase, cytoplasmic OS=Homo sapiens OX=9606 GN=DARS PE=1 SV=2	NA	1.56439	1.42716	-0.311252	0.137236	-0.448488	1.87564	1.59376	2.32918	0.0768764	0.0455477	0.120304	2.22027
P14923	JUP	Junction plakoglobin OS=Homo sapiens OX=9606 GN=JUP PE=1 SV=3	NA	0.504405	0.839387	-0.348864	-0.334982	-0.0138817	0.853269	0.327546	0.727625	0.133491	0.223248	0.0049824	0.666477
P15311	EZR	Ezrin OS=Homo sapiens OX=9606 GN=EZR PE=1 SV=4	NA	-0.952683	-0.415154	-0.865968	-0.537529	-0.328439	-0.0867145	0.98325	0.361305	0.160991	0.463544	0.0282068	0.029621
P15374	UCHL3	Ubiquitin carboxyl-terminal hydrolase isozyme L3 OS=Homo sapiens OX=9606 GN=UCHL3 PE=1 SV=1	NA	0.0688892	-0.454334	-0.46502	0.523223	-0.988243	0.533909	0.0485452	0.3723	0.139223	0.247758	0.238681	0.417087
P15531	NME1	Nucleoside diphosphate kinase A OS=Homo sapiens OX=9606 GN=NME1 PE=1 SV=1	NA	-0.676025	-0.008927	-0.6204	-0.667098	0.0466981	-0.0556251	0.607567	0.00450198	0.246818	0.472288	0.0105891	0.029621
P15880	RPS2	40S ribosomal protein S2 OS=Homo sapiens OX=9606 GN=RPS2 PE=1 SV=2	NA	NA	NA	-1.00119	-1.9153	0.914107	NA	NA	NA	0.222029	0.852904	0.161848	NA
P15880	RPS2	40S ribosomal protein S2 OS=Homo sapiens OX=9606 GN=RPS2 PE=1 SV=2	ribosome mRNA entry tunnel	1.67976	3.59506	NA	NA	NA	2.68095	1.41348	3.92577	NA	NA	NA	2.2836
P15924	DSP	Desmoplakin OS=Homo sapiens OX=9606 GN=DSP PE=1 SV=3	NA	0.590783	-0.0268583	0.277305	0.617641	-0.340337	0.313478	0.432998	0.0103608	0.0507578	0.277456	0.0396194	0.152693
P16104	H2AFX	Histone H2AX OS=Homo sapiens OX=9606 GN=H2AFX PE=1 SV=2	NA	-0.333628	0.642308	0.947333	-0.975936	1.92327	-1.28096	0.0557006	0.137304	0.0901865	0.107877	0.178136	0.426227
P16403	H1-2	Histone H1.2 OS=Homo sapiens OX=9606 GN=H1-2 PE=1 SV=2	NA	-1.41177	-0.672175	-0.290824	-0.739594	0.448771	-1.12095	1.32372	0.647243	0.0727427	0.463455	0.095039	0.963326
P16615	ATP2A2	Sarcoplasmic/endoplasmic reticulum calcium ATPase 2 OS=Homo sapiens OX=9606 GN=ATP2A2 PE=1 SV=1	NA	0.646693	-0.354534	-0.087961	1.00123	-1.08919	0.734654	0.585248	0.394153	0.017791	0.648237	0.601854	0.781763
P16949	STMN1	Stathmin OS=Homo sapiens OX=9606 GN=STMN1 PE=1 SV=3	NA	-0.00353179	-0.692168	1.06643	0.688636	0.377794	-1.06996	0.00168776	0.884517	0.151549	0.574281	0.0265969	0.421344
P17480	UBTF	Nucleolar transcription factor 1 OS=Homo sapiens OX=9606 GN=UBTF PE=1 SV=1	NA	2.44582	2.24446	0.348316	0.201365	0.146952	2.09751	2.16975	2.03084	0.108099	0.0729117	0.0243878	1.85089
P17812	CTPS1	CTP synthase 1 OS=Homo sapiens OX=9606 GN=CTPS1 PE=1 SV=2	NA	1.45054	0.983866	-0.0790464	0.466679	-0.545725	1.52959	1.02097	0.673099	0.017791	0.253587	0.170323	1.17999
P17844	DDX5	Probable ATP-dependent RNA helicase DDX5 OS=Homo sapiens OX=9606 GN=DDX5 PE=1 SV=1	NA	2.18906	1.44999	-0.46155	0.739066	-1.20062	2.65061	2.372	1.87522	0.124417	0.663464	0.340112	2.32519
P17987	TCP1	T-complex protein 1 subunit alpha OS=Homo sapiens OX=9606 GN=TCP1 PE=1 SV=1	NA	2.17121	2.02111	0.0363294	0.150095	-0.113765	2.13488	2.06452	2.7107	0.00407757	0.0441516	0.0228278	2.13191
P18077	RPL35A	60S ribosomal protein L35a OS=Homo sapiens OX=9606 GN=RPL35A PE=1 SV=2	NA	0.82967	1.01005	0.134899	-0.180383	0.315283	0.69477	0.85951	1.17828	0.0348889	0.0934742	0.0602307	0.528904
P18124	RPL7	60S ribosomal protein L7 OS=Homo sapiens OX=9606 GN=RPL7 PE=1 SV=1	NA	-0.975132	-0.949656	0.0701918	-0.0254764	0.0956682	-1.04532	1.00368	1.17091	0.0131245	0.0116094	0.0228278	1.02095
P18206	VCL	Vinculin OS=Homo sapiens OX=9606 GN=VCL PE=1 SV=4	NA	-0.286147	0.471872	-0.385928	-0.758019	0.372091	0.0997811	0.187116	0.368991	0.134042	0.494966	0.0677251	0.0529396
P18583	SON	Protein SON OS=Homo sapiens OX=9606 GN=SON PE=1 SV=4	NA	1.95021	1.59991	0.0742127	0.350295	-0.276083	1.876	1.89704	1.69571	0.017791	0.223248	0.0675567	1.86088
P18615	NELFE	Negative elongation factor E OS=Homo sapiens OX=9606 GN=NELFE PE=1 SV=3	NA	-1.37121	-1.89578	-1.5083	0.524566	-2.03287	0.137093	0.583414	2.94754	0.259769	0.0925009	1.24255	0.0956537
P18621	RPL17	60S ribosomal protein L17 OS=Homo sapiens OX=9606 GN=RPL17 PE=1 SV=3	NA	2.36314	2.75881	-0.114418	-0.395668	0.28125	2.47756	2.16975	3.00068	0.0240824	0.147267	0.0519615	2.6281
P18669	PGAM1	Phosphoglycerate mutase 1 OS=Homo sapiens OX=9606 GN=PGAM1 PE=1 SV=2	NA	0.450412	-0.259993	0.471927	0.710405	-0.238478	-0.0215151	0.379154	0.227769	0.191725	0.471841	0.0645645	0.0128009
P18754	RCC1	Regulator of chromosome condensation OS=Homo sapiens OX=9606 GN=RCC1 PE=1 SV=1	NA	1.97522	2.47544	0.283968	-0.500221	0.78419	1.69125	2.36719	3.2799	0.0582308	0.316739	0.168302	1.61258
P19174	PLCG1	1-phosphatidylinositol 4,5-bisphosphate phosphodiesterase gamma-1 OS=Homo sapiens OX=9606 GN=PLCG1 PE=1 SV=1	NA	-0.0516341	-0.472506	-0.28951	0.420872	-0.710382	0.237876	0.0189491	0.350747	0.0382719	0.137818	0.102463	0.10208
P19338	NCL	Nucleolin OS=Homo sapiens OX=9606 GN=NCL PE=1 SV=3	NA	0.00324563	0.0747788	-0.327355	-0.0715332	-0.255822	0.330601	0.00168776	0.0354721	0.0632474	0.0181487	0.0265969	0.162467
P19367	HK1	Hexokinase-1 OS=Homo sapiens OX=9606 GN=HK1 PE=1 SV=3	NA	-1.14454	0.736925	-1.32727	-1.88147	0.554196	0.182729	0.407206	0.436868	0.235538	0.472288	0.107825	0.082683
P19447	ERCC3	General transcription and DNA repair factor IIH helicase subunit XPB OS=Homo sapiens OX=9606 GN=ERCC3 PE=1 SV=1	NA	1.50366	1.42649	-0.0157217	0.0771661	-0.0928878	1.51938	1.04101	0.87113	0.00407757	0.0172059	0.0127368	1.05806
P19525	PKR	Interferon-induced, double-stranded RNA-activated protein kinase OS=Homo sapiens OX=9606 GN=EIF2AK2 PE=1 SV=2	defense response to virus	2.09684	2.2093	NA	NA	NA	1.87741	1.85939	2.17786	NA	NA	NA	1.63509
P19525	PKR	Interferon-induced, double-stranded RNA-activated protein kinase OS=Homo sapiens OX=9606 GN=EIF2AK2 PE=1 SV=2	NA	NA	NA	0.219422	-0.112469	0.331892	NA	NA	NA	0.073818	0.0631207	0.0838771	NA
P19623	SRM	Spermidine synthase OS=Homo sapiens OX=9606 GN=SRM PE=1 SV=1	NA	2.43005	2.28702	0.467991	0.143032	0.324959	1.96206	2.16975	1.74091	0.105222	0.0374252	0.0334519	1.36325
P19784	CSNK2A2	Casein kinase II subunit alpha' OS=Homo sapiens OX=9606 GN=CSNK2A2 PE=1 SV=1	NA	1.29767	1.41179	-0.727326	-0.11412	-0.613206	2.02499	0.575699	0.672913	0.129015	0.0154241	0.0649658	1.81164
P20042	EIF2S2	Eukaryotic translation initiation factor 2 subunit 2 OS=Homo sapiens OX=9606 GN=EIF2S2 PE=1 SV=2	NA	-1.2172	-1.25928	-0.0701679	0.0420806	-0.112248	-1.14703	1.24055	1.55586	0.0106798	0.0154241	0.0228278	1.16781
P20290	BTF3	Transcription factor BTF3 OS=Homo sapiens OX=9606 GN=BTF3 PE=1 SV=1	NA	-1.28259	-1.21987	-2.96671	-0.0627204	-2.90399	1.68412	1.28339	1.71369	0.613657	0.0173201	0.506818	0.792469
P20618	PSMB1	Proteasome subunit beta type-1 OS=Homo sapiens OX=9606 GN=PSMB1 PE=1 SV=2	NA	-0.300863	-0.0932937	-1.10105	-0.207569	-0.893478	0.800185	0.126879	0.0358644	0.298483	0.0360653	0.147262	0.756044
P21281	ATP6V1B2	V-type proton ATPase subunit B, brain isoform OS=Homo sapiens OX=9606 GN=ATP6V1B2 PE=1 SV=3	NA	0.586689	-0.856512	0.765094	1.4432	-0.678107	-0.178405	0.596074	0.81202	0.298483	0.839103	0.125327	0.107149
P21333	FLNA	Filamin-A OS=Homo sapiens OX=9606 GN=FLNA PE=1 SV=4	NA	-0.171273	-0.369069	0.538143	0.197797	0.340346	-0.709416	0.109864	0.307302	0.184312	0.101296	0.0675567	0.538055
P21741	MDK	Midkine OS=Homo sapiens OX=9606 GN=MDK PE=1 SV=1	NA	-1.3381	-1.42456	-0.842529	0.0864593	-0.928988	-0.495572	1.28447	1.37765	0.259698	0.0246831	0.195563	0.292371
P21796	VDAC1	Voltage-dependent anion-selective channel protein 1 OS=Homo sapiens OX=9606 GN=VDAC1 PE=1 SV=2	NA	1.46758	1.43558	-0.155331	0.0320045	-0.187336	1.62291	1.08883	1.10054	0.0382719	0.0154241	0.037936	1.21059
P22087	FBL	rRNA 2'-O-methyltransferase fibrillarin OS=Homo sapiens OX=9606 GN=FBL PE=1 SV=2	NA	2.10952	3.65482	0.984833	-1.54531	2.53014	1.12468	1.86982	4.04234	0.149038	0.739623	0.506818	0.562557
P22102	GART	Trifunctional purine biosynthetic protein adenosine-3 OS=Homo sapiens OX=9606 GN=GART PE=1 SV=1	NA	1.48406	1.52458	0.489233	-0.0405209	0.529754	0.994827	0.788514	0.904535	0.0559741	0.00977478	0.0435678	0.372208
P22234	PAICS	Multifunctional protein ADE2 OS=Homo sapiens OX=9606 GN=PAICS PE=1 SV=3	NA	0.401796	0.720984	-0.390291	-0.319188	-0.0711024	0.792086	0.240859	0.410489	0.0781275	0.0899016	0.00883145	0.45256
P22314	UBA1	Ubiquitin-like modifier-activating enzyme 1 OS=Homo sapiens OX=9606 GN=UBA1 PE=1 SV=3	NA	1.24254	0.54842	0.226237	0.694117	-0.467879	1.0163	1.60513	0.698946	0.0382719	0.52854	0.0675567	0.70528
P22392	NME2	Nucleoside diphosphate kinase B OS=Homo sapiens OX=9606 GN=NME2 PE=1 SV=1	NA	0.786393	0.201626	-0.552076	0.584767	-1.13684	1.33847	0.4096	0.0735032	0.0950999	0.115673	0.161848	1.11428
P22626	HNRNPA2B1	Heterogeneous nuclear ribonucleoproteins A2/B1 OS=Homo sapiens OX=9606 GN=HNRNPA2B1 PE=1 SV=2	NA	-0.254515	-1.14234	-0.198332	0.887827	-1.08616	-0.0561832	0.137949	1.39312	0.0348889	0.470415	0.251933	0.0240788
P22695	UQCRC2	Cytochrome b-c1 complex subunit 2, mitochondrial OS=Homo sapiens OX=9606 GN=UQCRC2 PE=1 SV=3	NA	-1.74008	1.30647	-3.13354	-3.04655	-0.0869865	1.39345	0.548793	1.18352	0.497082	0.663464	0.0228278	1.2291
P23246	SFPQ	Splicing factor, proline- and glutamine-rich OS=Homo sapiens OX=9606 GN=SFPQ PE=1 SV=2	NA	0.511609	-0.674586	0.358682	1.1862	-0.827513	0.152927	0.207326	0.276192	0.0448038	0.257485	0.0721191	0.0661985
P23284	PPIB	Peptidyl-prolyl cis-trans isomerase B OS=Homo sapiens OX=9606 GN=PPIB PE=1 SV=2	NA	1.58767	1.3322	0.952359	0.255469	0.69689	0.635312	1.18276	1.24344	0.150171	0.0564786	0.0675567	0.279158
P23381	WARS	Tryptophan--tRNA ligase, cytoplasmic OS=Homo sapiens OX=9606 GN=WARS PE=1 SV=2	NA	0.121778	0.136376	-0.411429	-0.0145987	-0.39683	0.533207	0.0661484	0.0771644	0.149038	0.00651034	0.0731214	0.392555
P23396	RPS3	40S ribosomal protein S3 OS=Homo sapiens OX=9606 GN=RPS3 PE=1 SV=2	NA	0.619116	0.852114	0.0310242	-0.232998	0.264022	0.588092	0.795146	1.19702	0.00621506	0.132662	0.066478	0.621928
P23526	AHCY	Adenosylhomocysteinase OS=Homo sapiens OX=9606 GN=AHCY PE=1 SV=4	NA	0.531522	2.01105	-0.300853	-1.47953	1.17868	0.832375	0.368996	2.691	0.0465973	0.790026	0.307021	0.602672
P23528	CFL1	Cofilin-1 OS=Homo sapiens OX=9606 GN=CFL1 PE=1 SV=3	NA	0.768351	0.513131	-0.184634	0.25522	-0.439854	0.952986	0.415798	0.293145	0.0254892	0.0729117	0.0461368	0.46262
P23588	EIF4B	Eukaryotic translation initiation factor 4B OS=Homo sapiens OX=9606 GN=EIF4B PE=1 SV=2	NA	-1.08085	-2.23317	-0.214895	1.15232	-1.36721	-0.865958	0.703271	1.40546	0.0371717	0.29172	0.211992	0.645454
P23921	RRM1	Ribonucleoside-diphosphate reductase large subunit OS=Homo sapiens OX=9606 GN=RRM1 PE=1 SV=1	NA	-0.462052	-0.150495	0.261967	-0.311557	0.573524	-0.724019	0.428256	0.118942	0.0693469	0.199094	0.126505	0.591525
P24752	ACAT1	Acetyl-CoA acetyltransferase, mitochondrial OS=Homo sapiens OX=9606 GN=ACAT1 PE=1 SV=1	NA	1.5418	1.50646	-0.0846449	0.0353352	-0.11998	1.62644	1.38693	1.46045	0.0150688	0.0154241	0.0228278	1.29934
P24928	POLR2A	DNA-directed RNA polymerase II subunit RPB1 OS=Homo sapiens OX=9606 GN=POLR2A PE=1 SV=2	NA	1.34727	0.797899	0.473573	0.549376	-0.0758028	0.873702	0.430936	0.298987	0.0375329	0.0690562	0.00503617	0.249106
P25205	MCM3	DNA replication licensing factor MCM3 OS=Homo sapiens OX=9606 GN=MCM3 PE=1 SV=3	NA	1.00766	0.898266	0.680089	0.109393	0.570696	0.32757	1.32111	1.0297	0.166736	0.0359024	0.0677251	0.176913
P25440	BRD2	Bromodomain-containing protein 2 OS=Homo sapiens OX=9606 GN=BRD2 PE=1 SV=2	NA	0.132337	0.484906	0.0659982	-0.352569	0.418567	0.0663392	0.0791982	0.344459	0.0150688	0.157812	0.0721191	0.0355807
P25705	ATP5F1A	ATP synthase subunit alpha, mitochondrial OS=Homo sapiens OX=9606 GN=ATP5F1A PE=1 SV=1	NA	1.39168	1.664	-0.686039	-0.272319	-0.41372	2.07772	1.44089	2.3519	0.117868	0.101296	0.037936	1.36012
P25786	PSMA1	Proteasome subunit alpha type-1 OS=Homo sapiens OX=9606 GN=PSMA1 PE=1 SV=1	NA	0.852377	1.06943	-0.271255	-0.217051	-0.0542043	1.12363	0.659807	1.00066	0.0854236	0.101296	0.0127368	0.980306
P25787	PSMA2	Proteasome subunit alpha type-2 OS=Homo sapiens OX=9606 GN=PSMA2 PE=1 SV=2	NA	-0.22513	0.207837	-0.217734	-0.432966	0.215233	-0.00739588	0.146812	0.16389	0.0382719	0.199094	0.0261385	0.0025422
P25788	PSMA3	Proteasome subunit alpha type-3 OS=Homo sapiens OX=9606 GN=PSMA3 PE=1 SV=2	NA	-0.0965139	1.26807	-1.13902	-1.36458	0.225562	1.04251	0.0362094	0.952419	0.47101	0.739623	0.0448875	0.765601
P26038	MSN	Moesin OS=Homo sapiens OX=9606 GN=MSN PE=1 SV=3	NA	-0.168494	0.169992	-0.3029	-0.338486	0.0355859	0.134406	0.0791982	0.123813	0.0382719	0.101296	0.00503617	0.0572417
P26358	DNMT1	DNA (cytosine-5)-methyltransferase 1 OS=Homo sapiens OX=9606 GN=DNMT1 PE=1 SV=2	NA	0.328611	1.18419	-0.570438	-0.855575	0.285138	0.899049	0.144122	1.14479	0.138568	0.316739	0.0612529	0.801668
P26368	U2AF2	Splicing factor U2AF 65 kDa subunit OS=Homo sapiens OX=9606 GN=U2AF2 PE=1 SV=4	NA	-0.350329	-1.12459	-0.429357	0.774262	-1.20362	0.0790272	0.244104	0.736243	0.0888302	0.227168	0.168302	0.0363577
P26373	RPL13	60S ribosomal protein L13 OS=Homo sapiens OX=9606 GN=RPL13 PE=1 SV=4	NA	1.03173	0.925989	0.608728	0.105737	0.50299	0.422999	1.06773	0.870172	0.204118	0.0360653	0.0782462	0.257704
P26599	PTBP1	Polypyrimidine tract-binding protein 1 OS=Homo sapiens OX=9606 GN=PTBP1 PE=1 SV=1	NA	0.137911	-0.0855124	0.160562	0.223423	-0.0628613	-0.0226512	0.088759	0.0660153	0.0348889	0.0947044	0.0127368	0.0113808
P26639	TARS1	Threonine--tRNA ligase 1, cytoplasmic OS=Homo sapiens OX=9606 GN=TARS1 PE=1 SV=3	NA	-0.218863	-0.980154	1.20468	0.761291	0.443394	-1.42355	0.0910207	0.920413	0.316912	0.247323	0.0713647	1.4282
P26640	VARS	Valine--tRNA ligase OS=Homo sapiens OX=9606 GN=VARS PE=1 SV=4	NA	0.291089	0.819556	-0.214937	-0.528467	0.31353	0.506026	0.249839	1.20195	0.0382719	0.318035	0.037936	0.297772
P26641	EEF1G	Elongation factor 1-gamma OS=Homo sapiens OX=9606 GN=EEF1G PE=1 SV=3	NA	0.31987	-0.72793	0.0162622	1.0478	-1.03154	0.303608	0.228751	0.743029	0.00407757	0.581299	0.252522	0.179413
P27348	YWHAQ	14-3-3 protein theta OS=Homo sapiens OX=9606 GN=YWHAQ PE=1 SV=1	NA	1.42243	0.972003	-0.467729	0.450428	-0.918157	1.89016	1.08883	1.34422	0.0879912	0.127826	0.262545	2.14989
P27448	MARK3	MAP/microtubule affinity-regulating kinase 3 OS=Homo sapiens OX=9606 GN=MARK3 PE=1 SV=5	NA	1.86948	1.83756	-0.854575	0.0319226	-0.886498	2.72406	0.821182	1.30641	0.131738	0.00604799	0.161848	2.13191
P27635	RPL10	60S ribosomal protein L10 OS=Homo sapiens OX=9606 GN=RPL10 PE=1 SV=4	NA	1.39959	1.70449	0.074005	-0.304896	0.378901	1.32559	1.73488	2.65413	0.0107782	0.153934	0.0675567	1.37117
P27694	RPA1	Replication protein A 70 kDa DNA-binding subunit OS=Homo sapiens OX=9606 GN=RPA1 PE=1 SV=2	NA	-0.974583	-1.90293	-0.0973189	0.928351	-1.02567	-0.877264	0.941592	2.0796	0.0129295	0.548945	0.200168	0.579264
P27695	APEX1	DNA-(apurinic or apyrimidinic site) lyase OS=Homo sapiens OX=9606 GN=APEX1 PE=1 SV=2	NA	0.476491	1.3092	-0.622868	-0.83271	0.209842	1.09936	0.516239	1.9846	0.246818	0.663464	0.037936	1.14884
P27708	CAD	CAD protein OS=Homo sapiens OX=9606 GN=CAD PE=1 SV=3	NA	0.362467	0.983104	-0.486664	-0.620637	0.133973	0.849131	0.32474	1.23005	0.224091	0.390902	0.0265969	0.971868
P27816	MAP4	Microtubule-associated protein 4 OS=Homo sapiens OX=9606 GN=MAP4 PE=1 SV=3	NA	-2.11073	-1.22336	-1.75917	-0.887375	-0.871798	-0.351558	1.86786	1.22884	0.693654	0.466464	0.252522	0.203506
P27824	CANX	Calnexin OS=Homo sapiens OX=9606 GN=CANX PE=1 SV=2	NA	0.255255	0.0503099	-0.477781	0.204945	-0.682726	0.733036	0.120515	0.0226899	0.0944472	0.0564786	0.0997566	0.422355
P28070	PSMB4	Proteasome subunit beta type-4 OS=Homo sapiens OX=9606 GN=PSMB4 PE=1 SV=4	NA	0.790066	0.816123	0.155342	-0.0260562	0.181398	0.634724	0.581421	0.572304	0.0313985	0.00651034	0.0228278	0.583246
P28074	PSMB5	Proteasome subunit beta type-5 OS=Homo sapiens OX=9606 GN=PSMB5 PE=1 SV=3	NA	0.442374	0.627841	0.217596	-0.185467	0.403063	0.224778	0.379154	0.586597	0.0559741	0.0624068	0.0713647	0.155799
P28288	ABCD3	ATP-binding cassette sub-family D member 3 OS=Homo sapiens OX=9606 GN=ABCD3 PE=1 SV=1	NA	1.04009	1.86625	-0.805065	-0.826159	0.0210935	1.84516	1.28339	2.89248	0.315818	0.618683	0.00503617	2.15563
P28331	NDUFS1	NADH-ubiquinone oxidoreductase 75 kDa subunit, mitochondrial OS=Homo sapiens OX=9606 GN=NDUFS1 PE=1 SV=3	NA	1.46464	0.44199	0.862052	1.02265	-0.160598	0.602589	1.08789	0.25613	0.191031	0.612704	0.0228278	0.251925
P28838	LAP3	Cytosol aminopeptidase OS=Homo sapiens OX=9606 GN=LAP3 PE=1 SV=3	NA	0.235595	-0.0289234	-0.209062	0.264519	-0.473581	0.444657	0.117932	0.0143194	0.0448038	0.11662	0.161848	0.285829
P29084	GTF2E2	Transcription initiation factor IIE subunit beta OS=Homo sapiens OX=9606 GN=GTF2E2 PE=1 SV=1	NA	-0.915565	-1.47437	-0.910614	0.558803	-1.46942	-0.00495138	0.720726	1.70446	0.259769	0.210641	0.506818	0.00245889
P29372	MPG	DNA-3-methyladenine glycosylase OS=Homo sapiens OX=9606 GN=MPG PE=1 SV=3	NA	1.42049	1.81049	-0.409407	-0.390002	-0.0194045	1.8299	1.48217	2.6228	0.123527	0.18536	0.00503617	2.10998
P29401	TKT	Transketolase OS=Homo sapiens OX=9606 GN=TKT PE=1 SV=3	NA	0.376457	0.139995	0.0405501	0.236461	-0.195911	0.335907	0.390656	0.134675	0.00527945	0.153455	0.0282068	0.207734
P29692	EEF1D	Elongation factor 1-delta OS=Homo sapiens OX=9606 GN=EEF1D PE=1 SV=5	NA	-0.0219468	0.754011	-0.691006	-0.775958	0.0849516	0.669059	0.0128248	0.988576	0.246818	0.69104	0.0171127	0.526226
P30048	PRDX3	Thioredoxin-dependent peroxide reductase, mitochondrial OS=Homo sapiens OX=9606 GN=PRDX3 PE=1 SV=3	NA	0.157593	-0.59792	0.0978328	0.755514	-0.657681	0.0597607	0.122326	0.451953	0.0303441	0.363193	0.123689	0.0364591
P30050	RPL12	60S ribosomal protein L12 OS=Homo sapiens OX=9606 GN=RPL12 PE=1 SV=1	NA	0.286957	-0.151667	0.874465	0.438624	0.435841	-0.587508	0.18192	0.13934	0.246818	0.196144	0.0677251	0.421344
P30101	PDIA3	Protein disulfide-isomerase A3 OS=Homo sapiens OX=9606 GN=PDIA3 PE=1 SV=4	NA	0.0141531	1.24804	0.189044	-1.23388	1.42293	-0.174891	0.00440462	1.34831	0.0348889	0.594427	0.488803	0.084694
P30153	PPP2R1A	Serine/threonine-protein phosphatase 2A 65 kDa regulatory subunit A alpha isoform OS=Homo sapiens OX=9606 GN=PPP2R1A PE=1 SV=4	NA	1.2468	0.748435	0.142271	0.498362	-0.356092	1.10453	1.61243	0.621603	0.0382719	0.193823	0.0519615	1.24091
P30260	CDC27	Cell division cycle protein 27 homolog OS=Homo sapiens OX=9606 GN=CDC27 PE=1 SV=2	NA	0.831813	1.22185	0.972298	-0.390032	1.36233	-0.140485	0.784814	1.53522	0.0901865	0.207694	0.0782556	0.029621
P30419	NMT1	Glycylpeptide N-tetradecanoyltransferase 1 OS=Homo sapiens OX=9606 GN=NMT1 PE=1 SV=2	NA	1.02201	2.14106	-0.925071	-1.11905	0.193978	1.94708	1.39054	3.05082	0.41863	0.852904	0.0366268	2.32678
P30520	ADSS2	Adenylosuccinate synthetase isozyme 2 OS=Homo sapiens OX=9606 GN=ADSS2 PE=1 SV=3	NA	1.24313	0.990917	0.226193	0.252215	-0.0260213	1.01694	1.42639	0.496197	0.0397232	0.0444578	0.00477198	0.86595
P30837	ALDH1B1	Aldehyde dehydrogenase X, mitochondrial OS=Homo sapiens OX=9606 GN=ALDH1B1 PE=1 SV=3	NA	-1.90929	-0.542312	-1.53604	-1.36698	-0.169061	-0.373252	0.962091	0.282859	0.298483	0.278375	0.0228278	0.333079
P30876	POLR2B	DNA-directed RNA polymerase II subunit RPB2 OS=Homo sapiens OX=9606 GN=POLR2B PE=1 SV=1	NA	0.650934	1.03343	-0.537335	-0.3825	-0.154835	1.18827	0.424849	1.17236	0.128266	0.118289	0.0261385	1.16808
P31040	SDHA	Succinate dehydrogenase [ubiquinone] flavoprotein subunit, mitochondrial OS=Homo sapiens OX=9606 GN=SDHA PE=1 SV=2	NA	0.553486	0.631867	0.112356	-0.0783808	0.190737	0.44113	0.462153	0.567092	0.0350643	0.0319197	0.0381978	0.33336
P31153	MAT2A	S-adenosylmethionine synthase isoform type-2 OS=Homo sapiens OX=9606 GN=MAT2A PE=1 SV=1	NA	0.904484	1.35848	-0.422598	-0.454	0.0314014	1.32708	0.556836	0.805576	0.0712132	0.137649	0.0049824	0.68609
P31939	ATIC	Bifunctional purine biosynthesis protein PURH OS=Homo sapiens OX=9606 GN=ATIC PE=1 SV=3	NA	1.29613	0.968021	-0.545128	0.328109	-0.873237	1.84126	1.68692	1.75613	0.157597	0.199094	0.270844	1.99471
P31943	HNRNPH1	Heterogeneous nuclear ribonucleoprotein H OS=Homo sapiens OX=9606 GN=HNRNPH1 PE=1 SV=4	NA	0.666797	0.152329	-0.162624	0.514468	-0.677091	0.82942	0.188543	0.0482673	0.00801317	0.0729117	0.037936	0.210229
P31944	CASP14	Caspase-14 OS=Homo sapiens OX=9606 GN=CASP14 PE=1 SV=2	NA	-1.12527	0.493445	-2.35136	-1.61871	-0.732646	1.22609	0.411163	0.191612	0.648311	0.513566	0.161848	0.646128
P31946	YWHAB	14-3-3 protein beta/alpha OS=Homo sapiens OX=9606 GN=YWHAB PE=1 SV=3	NA	0.944803	0.762431	-0.600146	0.182372	-0.782518	1.54495	1.33502	0.826546	0.150171	0.0631337	0.120304	1.34235
P32119	PRDX2	Peroxiredoxin-2 OS=Homo sapiens OX=9606 GN=PRDX2 PE=1 SV=5	NA	0.38181	-0.0838332	0.123149	0.465643	-0.342494	0.258661	0.288386	0.0584176	0.0303441	0.278375	0.0675567	0.161598
P32969	RPL9	60S ribosomal protein L9 OS=Homo sapiens OX=9606 GN=RPL9 PE=1 SV=1	NA	1.61566	2.69001	-0.119124	-1.07435	0.955226	1.73478	1.77106	3.31661	0.0303441	0.636905	0.357406	2.10998
P33176	KIF5B	Kinesin-1 heavy chain OS=Homo sapiens OX=9606 GN=KIF5B PE=1 SV=1	NA	-0.354375	-0.457963	-0.619441	0.103588	-0.723029	0.265066	0.189396	0.324701	0.207557	0.0360653	0.251933	0.139411
P33991	MCM4	DNA replication licensing factor MCM4 OS=Homo sapiens OX=9606 GN=MCM4 PE=1 SV=5	NA	0.96252	1.18812	-0.47448	-0.2256	-0.24888	1.437	0.992178	1.55586	0.138568	0.0807468	0.0396194	1.57831
P33992	MCM5	DNA replication licensing factor MCM5 OS=Homo sapiens OX=9606 GN=MCM5 PE=1 SV=5	NA	1.27591	2.48562	-0.901406	-1.20971	0.308304	2.17732	1.57949	3.53318	0.327269	0.845109	0.0645645	2.48588
P33993	MCM7	DNA replication licensing factor MCM7 OS=Homo sapiens OX=9606 GN=MCM7 PE=1 SV=4	NA	1.62494	1.35156	0.106276	0.273383	-0.167107	1.51866	2.12716	2.2346	0.0261725	0.171006	0.0322054	1.71838
P34897	SHMT2	Serine hydroxymethyltransferase, mitochondrial OS=Homo sapiens OX=9606 GN=SHMT2 PE=1 SV=3	NA	0.452119	0.577404	-0.190509	-0.125285	-0.065224	0.642628	0.237019	0.352652	0.0472321	0.0424993	0.0143271	0.417087
P34932	HSPA4	Heat shock 70 kDa protein 4 OS=Homo sapiens OX=9606 GN=HSPA4 PE=1 SV=4	NA	0.910598	0.771819	0.403776	0.138779	0.264997	0.506822	0.907002	1.04347	0.0716759	0.0451785	0.0282068	0.275959
P35221	CTNNA1	Catenin alpha-1 OS=Homo sapiens OX=9606 GN=CTNNA1 PE=1 SV=1	NA	0.804501	1.08016	1.14376	-0.275659	1.41942	-0.339261	0.413617	0.998508	0.246818	0.0530594	0.35224	0.195666
P35232	PHB	Prohibitin OS=Homo sapiens OX=9606 GN=PHB PE=1 SV=1	NA	1.68598	1.34446	-0.0137723	0.341518	-0.35529	1.69975	1.61527	1.42875	0.00407757	0.190793	0.0677251	1.5733
P35251	RFC1	Replication factor C subunit 1 OS=Homo sapiens OX=9606 GN=RFC1 PE=1 SV=4	NA	1.87604	1.29815	0.0861113	0.577896	-0.491785	1.78993	2.06661	1.95322	0.0106549	0.327688	0.0677251	1.53579
P35268	RPL22	60S ribosomal protein L22 OS=Homo sapiens OX=9606 GN=RPL22 PE=1 SV=2	NA	1.54056	2.02336	0.0174831	-0.4828	0.500283	1.52308	1.98492	3.23703	0.00407757	0.316519	0.103273	1.62688
P35527	KRT9	Keratin, type I cytoskeletal 9 OS=Homo sapiens OX=9606 GN=KRT9 PE=1 SV=3	NA	0.450053	-0.875073	0.695227	1.32513	-0.629899	-0.245174	0.20361	0.598463	0.0879912	0.403416	0.0516954	0.082683
P35579	MYH9	Myosin-9 OS=Homo sapiens OX=9606 GN=MYH9 PE=1 SV=4	NA	0.477815	0.182257	-0.0387845	0.295557	-0.334342	0.516599	0.548421	0.181182	0.00621506	0.1823	0.0675567	0.45256
P35580	MYH10	Myosin-10 OS=Homo sapiens OX=9606 GN=MYH10 PE=1 SV=3	NA	0.401296	0.878115	-0.381941	-0.476819	0.094878	0.783237	0.275969	1.08472	0.0950999	0.257485	0.0228278	0.649763
P35606	COPB2	Coatomer subunit beta' OS=Homo sapiens OX=9606 GN=COPB2 PE=1 SV=2	NA	-0.122056	-1.06842	-0.342434	0.946365	-1.2888	0.220378	0.0597945	0.519471	0.0879912	0.247758	0.172668	0.1199
P35613	BSG	Basigin OS=Homo sapiens OX=9606 GN=BSG PE=1 SV=2	NA	1.61936	1.41998	0.018354	0.199377	-0.181023	1.601	1.21366	0.647442	0.00363635	0.0235934	0.0127368	0.916057
P35658	NUP214	Nuclear pore complex protein Nup214 OS=Homo sapiens OX=9606 GN=NUP214 PE=1 SV=2	NA	0.0512513	0.00386018	-1.35365	0.0473912	-1.40104	1.4049	0.0203807	0.000805101	0.47964	0.009582	0.179536	1.00591
P35659	DEK	Protein DEK OS=Homo sapiens OX=9606 GN=DEK PE=1 SV=1	NA	0.833301	1.46821	-0.693242	-0.634906	-0.0583363	1.52654	0.475431	1.25109	0.0872027	0.138989	0.00503617	0.83706
P35998	PSMC2	26S proteasome regulatory subunit 7 OS=Homo sapiens OX=9606 GN=PSMC2 PE=1 SV=3	NA	-0.0113439	-0.572492	-0.176913	0.561149	-0.738061	0.165569	0.00440462	0.452317	0.0348945	0.35359	0.123689	0.071294
P36507	MAP2K2	Dual specificity mitogen-activated protein kinase kinase 2 OS=Homo sapiens OX=9606 GN=MAP2K2 PE=1 SV=1	NA	2.15568	2.1894	0.67936	-0.0337156	0.713076	1.47632	2.2647	2.3258	0.246818	0.0108918	0.147262	1.56605
P36542	ATP5F1C	ATP synthase subunit gamma, mitochondrial OS=Homo sapiens OX=9606 GN=ATP5F1C PE=1 SV=1	NA	2.63024	3.06444	0.168948	-0.434198	0.603146	2.46129	2.46964	3.25	0.0415883	0.233204	0.187231	2.65297
P36578	RPL4	60S ribosomal protein L4 OS=Homo sapiens OX=9606 GN=RPL4 PE=1 SV=5	NA	2.30427	2.92552	-0.418266	-0.621255	0.202988	2.72253	2.28782	3.79419	0.0859351	0.32175	0.0265969	2.50649
P36915	GNL1	Guanine nucleotide-binding protein-like 1 OS=Homo sapiens OX=9606 GN=GNL1 PE=1 SV=2	NA	1.05669	0.856608	-0.294633	0.200086	-0.494719	1.35133	0.79038	0.647033	0.0888302	0.0784295	0.120304	1.11578
P37108	SRP14	Signal recognition particle 14 kDa protein OS=Homo sapiens OX=9606 GN=SRP14 PE=1 SV=2	NA	-0.0677556	-0.125268	0.191433	0.0575129	0.133921	-0.259189	0.0419012	0.0878517	0.0574086	0.0204725	0.0265969	0.190058
P37802	TAGLN2	Transgelin-2 OS=Homo sapiens OX=9606 GN=TAGLN2 PE=1 SV=3	NA	-0.403619	-1.34905	-0.595883	0.945427	-1.54131	0.192264	0.389676	1.85382	0.211857	0.663464	0.65398	0.11661
P37837	TALDO1	Transaldolase OS=Homo sapiens OX=9606 GN=TALDO1 PE=1 SV=2	NA	2.01322	2.29272	0.961583	-0.2795	1.24108	1.05164	1.11113	1.55865	0.235369	0.0912233	0.323066	0.492617
P38117	ETFB	Electron transfer flavoprotein subunit beta OS=Homo sapiens OX=9606 GN=ETFB PE=1 SV=3	NA	0.969261	1.1262	0.081018	-0.156937	0.237955	0.888243	0.924556	1.89196	0.0126066	0.0553001	0.0519615	0.940887
P38159	RBMX	RNA-binding motif protein, X chromosome OS=Homo sapiens OX=9606 GN=RBMX PE=1 SV=3	NA	-1.20971	0.140399	-1.12746	-1.35011	0.222655	-0.0822559	1.30148	0.0966376	0.41863	0.852904	0.0366268	0.0423066
P38432	COIL	Coilin OS=Homo sapiens OX=9606 GN=COIL PE=1 SV=1	NA	0.502921	0.394734	-0.0330153	0.108187	-0.141202	0.535936	0.289862	0.179047	0.00407757	0.0270981	0.0209788	0.269207
P38606	ATP6V1A	V-type proton ATPase catalytic subunit A OS=Homo sapiens OX=9606 GN=ATP6V1A PE=1 SV=2	NA	0.720941	1.00747	-0.174872	-0.286529	0.111657	0.895813	0.59676	0.924556	0.0382719	0.125038	0.0228278	0.704412
P38646	HSPA9	Stress-70 protein, mitochondrial OS=Homo sapiens OX=9606 GN=HSPA9 PE=1 SV=2	NA	0.514234	0.301588	0.18719	0.212646	-0.0254565	0.327044	0.432998	0.294055	0.0382719	0.101296	0.00503617	0.210131
P38919	EIF4A3	Eukaryotic initiation factor 4A-III OS=Homo sapiens OX=9606 GN=EIF4A3 PE=1 SV=4	NA	0.680962	1.36822	-1.24439	-0.687256	-0.55713	1.92535	0.715692	1.84865	0.575436	0.363985	0.126505	2.41006
P38935	IGHMBP2	DNA-binding protein SMUBP-2 OS=Homo sapiens OX=9606 GN=IGHMBP2 PE=1 SV=3	NA	0.916057	2.32106	-1.21991	-1.405	0.185089	2.13597	0.821182	2.79309	0.41863	0.845109	0.0265969	2.06527
P39019	RPS19	40S ribosomal protein S19 OS=Homo sapiens OX=9606 GN=RPS19 PE=1 SV=2	NA	0.444233	-0.618573	0.255108	1.06281	-0.807698	0.189125	0.367169	0.638949	0.0433275	0.755452	0.147262	0.0895666
P39656	DDOST	Dolichyl-diphosphooligosaccharide--protein glycosyltransferase 48 kDa subunit OS=Homo sapiens OX=9606 GN=DDOST PE=1 SV=4	NA	1.62633	2.06255	-1.29896	-0.436218	-0.86274	2.92529	2.11432	3.05082	0.643632	0.287647	0.303252	3.11561
P39748	FEN1	Flap endonuclease 1 OS=Homo sapiens OX=9606 GN=FEN1 PE=1 SV=1	NA	0.0242678	1.74434	-2.38164	-1.72007	-0.66157	2.40591	0.00899879	1.68163	0.752996	0.710709	0.0829232	2.10986
P40227	CCT6A	T-complex protein 1 subunit zeta OS=Homo sapiens OX=9606 GN=CCT6A PE=1 SV=3	NA	1.85713	0.906732	0.776157	0.9504	-0.174243	1.08097	2.29648	1.22335	0.327269	0.772592	0.0334519	1.15762
P40429	RPL13A	60S ribosomal protein L13a OS=Homo sapiens OX=9606 GN=RPL13A PE=1 SV=2	NA	-0.310483	0.801648	-0.571261	-1.11213	0.54087	0.260778	0.131664	0.935201	0.124417	0.433147	0.16311	0.165507
P40925	MDH1	Malate dehydrogenase, cytoplasmic OS=Homo sapiens OX=9606 GN=MDH1 PE=1 SV=4	NA	1.11475	1.86288	-0.584279	-0.748126	0.163847	1.69903	1.45693	2.61514	0.149038	0.483161	0.0228278	1.50814
P40926	MDH2	Malate dehydrogenase, mitochondrial OS=Homo sapiens OX=9606 GN=MDH2 PE=1 SV=3	NA	0.622915	-0.454075	0.834123	1.07699	-0.242867	-0.211208	0.375927	0.46722	0.196763	0.428403	0.037936	0.121177
P40939	HADHA	Trifunctional enzyme subunit alpha, mitochondrial OS=Homo sapiens OX=9606 GN=HADHA PE=1 SV=2	NA	1.46588	1.93224	1.28409	-0.466357	1.75045	0.181793	1.46955	2.27262	0.240236	0.277255	0.259956	0.0543863
P41091	EIF2S3	Eukaryotic translation initiation factor 2 subunit 3 OS=Homo sapiens OX=9606 GN=EIF2S3 PE=1 SV=3	NA	0.0529343	0.250612	-0.850772	-0.197677	-0.653095	0.903707	0.0176755	0.112726	0.246818	0.0360653	0.0996775	0.827705
P41227	NAA10	N-alpha-acetyltransferase 10 OS=Homo sapiens OX=9606 GN=NAA10 PE=1 SV=1	NA	1.26294	0.945535	0.179122	0.317405	-0.138283	1.08382	0.593649	0.443392	0.0382719	0.125038	0.0261385	0.549739
P41240	CSK	Tyrosine-protein kinase CSK OS=Homo sapiens OX=9606 GN=CSK PE=1 SV=1	NA	0.65206	1.15394	0.332336	-0.50188	0.834216	0.319724	0.441282	1.17012	0.0950999	0.265386	0.357406	0.195666
P41252	IARS	Isoleucine--tRNA ligase, cytoplasmic OS=Homo sapiens OX=9606 GN=IARS PE=1 SV=2	NA	1.79944	1.50147	0.748591	0.297974	0.450617	1.05085	2.00434	1.59562	0.180666	0.138989	0.0519615	0.647343
P41743	PRKCI	Protein kinase C iota type OS=Homo sapiens OX=9606 GN=PRKCI PE=1 SV=2	NA	1.85061	1.49436	0.173053	0.356248	-0.183195	1.67756	1.38321	1.1641	0.0472321	0.260739	0.0448875	1.26334
P42167	TMPO	Lamina-associated polypeptide 2, isoforms beta/gamma OS=Homo sapiens OX=9606 GN=TMPO PE=1 SV=2	NA	-0.224713	-0.270883	-0.0312343	0.0461701	-0.0774044	-0.193479	0.143686	0.163607	0.00407757	0.0154241	0.0127368	0.098987
P42574	CASP3	Caspase-3 OS=Homo sapiens OX=9606 GN=CASP3 PE=1 SV=2	NA	0.808019	0.283901	-0.0189512	0.524118	-0.543069	0.82697	0.348285	0.105648	0.00407757	0.291077	0.125327	0.374331
P42677	RPS27	40S ribosomal protein S27 OS=Homo sapiens OX=9606 GN=RPS27 PE=1 SV=3	NA	0.686181	NA	-0.27332	-0.585742	0.312422	0.959501	0.865336	NA	0.0950999	0.362347	0.0675567	1.13074
P42677	RPS27	40S ribosomal protein S27 OS=Homo sapiens OX=9606 GN=RPS27 PE=1 SV=3	ribosome mRNA entry tunnel	NA	1.27192	NA	NA	NA	NA	NA	1.70654	NA	NA	NA	NA
P42695	NCAPD3	Condensin-2 complex subunit D3 OS=Homo sapiens OX=9606 GN=NCAPD3 PE=1 SV=2	NA	-0.0850529	0.401588	1.60442	-0.486641	2.09106	-1.68947	0.0300289	0.181006	0.47101	0.265386	0.551055	0.916057
P42696	RBM34	RNA-binding protein 34 OS=Homo sapiens OX=9606 GN=RBM34 PE=1 SV=2	NA	1.44884	2.13898	-0.401377	-0.690143	0.288766	1.85022	1.52818	2.69527	0.149038	0.569265	0.0692124	1.99471
P42704	LRPPRC	Leucine-rich PPR motif-containing protein, mitochondrial OS=Homo sapiens OX=9606 GN=LRPPRC PE=1 SV=3	NA	0.711141	0.834452	-0.383171	-0.123311	-0.25986	1.09431	0.622838	0.356099	0.0559741	0.0173201	0.0228278	0.668837
P42766	RPL35	60S ribosomal protein L35 OS=Homo sapiens OX=9606 GN=RPL35 PE=1 SV=2	NA	-0.778276	-1.20821	0.255479	0.429936	-0.174456	-1.03376	0.519949	1.27185	0.0496914	0.174201	0.0334519	0.88711
P43243	MATR3	Matrin-3 OS=Homo sapiens OX=9606 GN=MATR3 PE=1 SV=2	NA	0.234104	-0.578142	-0.218946	0.812245	-1.03119	0.45305	0.146812	0.746245	0.0382719	0.472288	0.280165	0.28007
P43246	MSH2	DNA mismatch repair protein Msh2 OS=Homo sapiens OX=9606 GN=MSH2 PE=1 SV=1	NA	1.51975	1.5647	-0.19547	-0.0449456	-0.150525	1.71522	1.24259	1.39312	0.0382719	0.0120649	0.0243878	1.72875
P43250	GRK6	G protein-coupled receptor kinase 6 OS=Homo sapiens OX=9606 GN=GRK6 PE=1 SV=2	NA	0.551213	0.0478628	0.340338	0.50335	-0.163012	0.210875	0.229379	0.0158656	0.0716759	0.191854	0.0261385	0.082683
P43490	NAMPT	Nicotinamide phosphoribosyltransferase OS=Homo sapiens OX=9606 GN=NAMPT PE=1 SV=1	NA	1.74212	-0.791779	0.131075	2.5339	-2.40282	1.61104	2.24266	0.209326	0.0382719	0.49368	0.252522	2.03303
P43897	TSFM	Elongation factor Ts, mitochondrial OS=Homo sapiens OX=9606 GN=TSFM PE=1 SV=2	NA	2.67638	3.29464	-0.459903	-0.618264	0.158361	3.13628	1.88643	3.47462	0.0947977	0.201243	0.034113	3.11561
P45880	VDAC2	Voltage-dependent anion-selective channel protein 2 OS=Homo sapiens OX=9606 GN=VDAC2 PE=1 SV=2	NA	2.42369	3.14446	-0.582366	-0.720778	0.138411	3.00605	2.36719	3.71217	0.191031	0.433147	0.0261385	3.05965
P46060	RANGAP1	Ran GTPase-activating protein 1 OS=Homo sapiens OX=9606 GN=RANGAP1 PE=1 SV=1	NA	0.14746	0.71381	-0.694587	-0.56635	-0.128237	0.842047	0.04328	0.606953	0.110577	0.107877	0.0228278	0.811997
P46063	RECQL	ATP-dependent DNA helicase Q1 OS=Homo sapiens OX=9606 GN=RECQL PE=1 SV=3	NA	0.00662718	0.116241	0.0076185	-0.109614	0.117232	-0.000991316	0.00236871	0.0721066	0.00363635	0.0424993	0.0228278	0.00068726
P46087	NOP2	Probable 28S rRNA (cytosine(4447)-C(5))-methyltransferase OS=Homo sapiens OX=9606 GN=NOP2 PE=1 SV=2	NA	1.95361	3.82747	-1.73609	-1.87386	0.137766	3.6897	2.20172	4.08954	0.534764	1.39483	0.0228278	3.11561
P46776	RPL27A	60S ribosomal protein L27a OS=Homo sapiens OX=9606 GN=RPL27A PE=1 SV=2	NA	-0.0325922	-0.517557	0.864439	0.484965	0.379474	-0.897031	0.0164992	0.488397	0.298814	0.205557	0.0675567	0.879947
P46777	RPL5	60S ribosomal protein L5 OS=Homo sapiens OX=9606 GN=RPL5 PE=1 SV=3	NA	1.47659	2.21659	0.154194	-0.739999	0.894193	1.3224	1.82141	3.29472	0.0382719	0.524293	0.354203	1.50259
P46778	RPL21	60S ribosomal protein L21 OS=Homo sapiens OX=9606 GN=RPL21 PE=1 SV=2	NA	0.5554	0.489684	0.204679	0.065716	0.138963	0.350722	0.318745	0.331084	0.0382719	0.0173201	0.0228278	0.169267
P46779	RPL28	60S ribosomal protein L28 OS=Homo sapiens OX=9606 GN=RPL28 PE=1 SV=3	NA	-0.331157	-0.392934	0.240278	0.0617766	0.178501	-0.571435	0.232268	0.322242	0.0573886	0.0204492	0.027759	0.423272
P46781	RPS9	40S ribosomal protein S9 OS=Homo sapiens OX=9606 GN=RPS9 PE=1 SV=3	NA	1.48274	2.09259	-0.0773411	-0.609856	0.532515	1.56008	1.81485	3.0633	0.0107782	0.41413	0.102463	1.52953
P46782	RPS5	40S ribosomal protein S5 OS=Homo sapiens OX=9606 GN=RPS5 PE=1 SV=4	NA	0.771548	1.52184	-0.200324	-0.750293	0.549969	0.971872	0.656868	2.05128	0.0433275	0.46089	0.178136	0.967923
P46783	RPS10	40S ribosomal protein S10 OS=Homo sapiens OX=9606 GN=RPS10 PE=1 SV=1	NA	0.941874	0.878657	-0.137134	0.0632174	-0.200351	1.07901	0.615839	0.826546	0.0175937	0.0145602	0.0261385	0.93705
P46940	IQGAP1	Ras GTPase-activating-like protein IQGAP1 OS=Homo sapiens OX=9606 GN=IQGAP1 PE=1 SV=1	NA	1.02332	1.8352	-0.879188	-0.811882	-0.0673057	1.90251	1.25951	3.0633	0.376787	0.598131	0.0179747	2.41006
P46977	STT3A	Dolichyl-diphosphooligosaccharide--protein glycosyltransferase subunit STT3A OS=Homo sapiens OX=9606 GN=STT3A PE=1 SV=2	NA	0.776529	0.682676	-0.061789	0.0938534	-0.155642	0.838318	0.389676	0.331084	0.0106798	0.0340794	0.0265969	0.433985
P47756	CAPZB	F-actin-capping protein subunit beta OS=Homo sapiens OX=9606 GN=CAPZB PE=1 SV=4	NA	0.99734	0.575611	-0.151715	0.421729	-0.573443	1.14905	0.512028	0.281924	0.0348889	0.13434	0.123689	0.748846
P47813	EIF1AX	Eukaryotic translation initiation factor 1A, X-chromosomal OS=Homo sapiens OX=9606 GN=EIF1AX PE=1 SV=2	translation initiation factor (eIF)	NA	2.22584	NA	NA	NA	NA	NA	1.86071	NA	NA	NA	NA
P47813	EIF1AX	Eukaryotic translation initiation factor 1A, X-chromosomal OS=Homo sapiens OX=9606 GN=EIF1AX PE=1 SV=2	NA	1.0991	NA	0.536968	-1.12674	1.66371	0.562131	0.742811	NA	0.0951109	0.472288	0.356416	0.263425
P47897	QARS	Glutamine--tRNA ligase OS=Homo sapiens OX=9606 GN=QARS PE=1 SV=1	NA	0.970986	0.611019	0.369553	0.359966	0.00958687	0.601432	0.625271	0.417172	0.111254	0.164293	0.00477198	0.380216
P47914	RPL29	60S ribosomal protein L29 OS=Homo sapiens OX=9606 GN=RPL29 PE=1 SV=2	NA	-2.06825	-1.81329	-0.577656	-0.254964	-0.322692	-1.4906	2.55006	3.09553	0.246818	0.153934	0.0829232	1.91645
P48047	ATP5PO	ATP synthase subunit O, mitochondrial OS=Homo sapiens OX=9606 GN=ATP5PO PE=1 SV=1	NA	0.216261	0.256472	-0.869007	-0.0402106	-0.828797	1.08527	0.123714	0.159029	0.37237	0.0133293	0.259956	1.10488
P48444	ARCN1	Coatomer subunit delta OS=Homo sapiens OX=9606 GN=ARCN1 PE=1 SV=1	NA	1.16137	0.304003	0.421026	0.857371	-0.436345	0.740348	1.35681	0.208017	0.102344	0.40706	0.0633129	0.583246
P48634	PRRC2A	Protein PRRC2A OS=Homo sapiens OX=9606 GN=PRRC2A PE=1 SV=3	NA	-0.227049	-1.29463	-0.149206	1.06758	-1.21679	-0.0778426	0.149675	1.85354	0.0354405	0.628193	0.576455	0.0505284
P48643	CCT5	T-complex protein 1 subunit epsilon OS=Homo sapiens OX=9606 GN=CCT5 PE=1 SV=1	NA	0.365626	-0.50527	0.440832	0.870896	-0.430064	-0.075206	0.268143	0.534109	0.151549	0.615868	0.126505	0.0447085
P48729	CSNK1A1	Casein kinase I isoform alpha OS=Homo sapiens OX=9606 GN=CSNK1A1 PE=1 SV=2	NA	0.420546	0.766499	-0.373364	-0.345953	-0.0274103	0.793909	0.190843	0.542622	0.0833317	0.0984219	0.00503617	0.604771
P48735	IDH2	Isocitrate dehydrogenase [NADP], mitochondrial OS=Homo sapiens OX=9606 GN=IDH2 PE=1 SV=2	NA	1.38265	1.16869	0.273422	0.21396	0.0594621	1.10923	1.57905	1.31759	0.0805133	0.101296	0.0127368	1.04357
P49005	POLD2	DNA polymerase delta subunit 2 OS=Homo sapiens OX=9606 GN=POLD2 PE=1 SV=1	NA	0.753969	0.645186	-0.252587	0.108783	-0.36137	1.00656	0.655036	0.533732	0.0693469	0.0427242	0.0675567	0.814442
P49189	ALDH9A1	4-trimethylaminobutyraldehyde dehydrogenase OS=Homo sapiens OX=9606 GN=ALDH9A1 PE=1 SV=3	NA	-0.614494	-2.91375	0.0931486	2.29925	-2.2061	-0.707642	0.603619	0.676175	0.0150688	0.265386	0.103273	0.486685
P49207	RPL34	60S ribosomal protein L34 OS=Homo sapiens OX=9606 GN=RPL34 PE=1 SV=3	NA	-1.36056	-0.902505	-0.629964	-0.458054	-0.17191	-0.730596	1.46685	0.992283	0.223391	0.181249	0.0265969	0.749553
P49327	FASN	Fatty acid synthase OS=Homo sapiens OX=9606 GN=FASN PE=1 SV=3	NA	0.305636	-0.062684	0.469572	0.36832	0.101252	-0.163936	0.27505	0.0269641	0.149038	0.107877	0.0127368	0.101256
P49368	CCT3	T-complex protein 1 subunit gamma OS=Homo sapiens OX=9606 GN=CCT3 PE=1 SV=4	NA	1.7206	1.90441	-0.44117	-0.183812	-0.257358	2.16177	2.04972	2.60041	0.129817	0.0807468	0.0396194	2.21121
P49411	TUFM	Elongation factor Tu, mitochondrial OS=Homo sapiens OX=9606 GN=TUFM PE=1 SV=2	NA	0.263591	2.72487	-0.852716	-2.46128	1.60856	1.11631	0.222701	3.18429	0.111075	1.68877	0.161848	0.412747
P49588	AARS	Alanine--tRNA ligase, cytoplasmic OS=Homo sapiens OX=9606 GN=AARS PE=1 SV=2	NA	0.772009	0.23194	0.354228	0.540069	-0.185841	0.417781	0.331841	0.124857	0.0507234	0.142034	0.0366268	0.2173
P49589	CARS	Cysteine--tRNA ligase, cytoplasmic OS=Homo sapiens OX=9606 GN=CARS PE=1 SV=3	NA	-0.54643	0.0121212	-1.06273	-0.558552	-0.504176	0.516297	0.400367	0.00450198	0.327269	0.302299	0.0677251	0.278845
P49591	SARS	Serine--tRNA ligase, cytoplasmic OS=Homo sapiens OX=9606 GN=SARS PE=1 SV=3	NA	0.263366	-0.364464	0.195299	0.627831	-0.432532	0.0680675	0.120515	0.256881	0.0382719	0.278375	0.102463	0.0328786
P49593	PPM1F	Protein phosphatase 1F OS=Homo sapiens OX=9606 GN=PPM1F PE=1 SV=3	NA	2.31422	0.20365	-0.317468	2.11057	-2.42804	2.63169	0.593506	0.0272487	0.0826644	0.510659	0.340112	0.765601
P49642	PRIM1	DNA primase small subunit OS=Homo sapiens OX=9606 GN=PRIM1 PE=1 SV=1	NA	0.93582	0.620526	0.0783348	0.315294	-0.236959	0.857485	0.58846	0.290153	0.0106549	0.0608015	0.0261385	0.710161
P49674	CSNK1E	Casein kinase I isoform epsilon OS=Homo sapiens OX=9606 GN=CSNK1E PE=1 SV=1	NA	0.324732	1.59986	-0.857272	-1.27513	0.417854	1.182	0.264662	2.1401	0.298814	0.921634	0.0677251	1.04607
P49736	MCM2	DNA replication licensing factor MCM2 OS=Homo sapiens OX=9606 GN=MCM2 PE=1 SV=4	NA	1.40588	1.27398	0.59446	0.131894	0.462566	0.811416	2.06452	1.83787	0.294408	0.0565728	0.120304	0.949889
P49756	RBM25	RNA-binding protein 25 OS=Homo sapiens OX=9606 GN=RBM25 PE=1 SV=3	NA	0.867589	1.14944	-0.5635	-0.281851	-0.281649	1.43109	0.462153	0.743085	0.230555	0.137818	0.0675567	0.958211
P49790	NUP153	Nuclear pore complex protein Nup153 OS=Homo sapiens OX=9606 GN=NUP153 PE=1 SV=2	NA	-0.614713	-1.69406	0.674281	1.07935	-0.405068	-1.28899	0.302505	2.50206	0.125591	0.342773	0.0675567	1.31934
P49792	RANBP2	E3 SUMO-protein ligase RanBP2 OS=Homo sapiens OX=9606 GN=RANBP2 PE=1 SV=2	NA	0.984547	0.601375	0.016379	0.383172	-0.366793	0.968168	1.1239	0.736345	0.00407757	0.287647	0.120304	1.03255
P49915	GMPS	GMP synthase [glutamine-hydrolyzing] OS=Homo sapiens OX=9606 GN=GMPS PE=1 SV=1	NA	1.64412	1.7566	0.140263	-0.112481	0.252744	1.50386	2.18408	2.79309	0.0400801	0.0624068	0.0677251	1.91559
P49916	LIG3	DNA ligase 3 OS=Homo sapiens OX=9606 GN=LIG3 PE=1 SV=2	NA	1.16927	0.228131	-0.343463	0.94114	-1.2846	1.51273	0.680911	0.0499573	0.0950999	0.153934	0.10618	1.08801
P50213	IDH3A	Isocitrate dehydrogenase [NAD] subunit alpha, mitochondrial OS=Homo sapiens OX=9606 GN=IDH3A PE=1 SV=1	NA	1.68004	0.926817	0.480608	0.753228	-0.272619	1.19944	1.77106	0.964608	0.149038	0.46843	0.0461368	1.10534
P50395	GDI2	Rab GDP dissociation inhibitor beta OS=Homo sapiens OX=9606 GN=GDI2 PE=1 SV=2	NA	0.258724	0.339437	0.544797	-0.0807129	0.62551	-0.286072	0.194384	0.440949	0.151549	0.0319197	0.16311	0.194868
P50402	EMD	Emerin OS=Homo sapiens OX=9606 GN=EMD PE=1 SV=1	NA	0.520234	0.251246	-0.367397	0.268988	-0.636385	0.887631	0.392076	0.190355	0.105222	0.11577	0.178136	0.8004
P50454	SERPINH1	Serpin H1 OS=Homo sapiens OX=9606 GN=SERPINH1 PE=1 SV=2	NA	0.229128	-0.491806	0.343304	0.720934	-0.37763	-0.114176	0.193277	0.312999	0.0844139	0.295121	0.0396194	0.0559231
P50570	DNM2	Dynamin-2 OS=Homo sapiens OX=9606 GN=DNM2 PE=1 SV=2	NA	0.673647	0.20477	0.39153	0.468876	-0.0773461	0.282116	0.646935	0.114539	0.114164	0.199094	0.0127368	0.15899
P50579	METAP2	Methionine aminopeptidase 2 OS=Homo sapiens OX=9606 GN=METAP2 PE=1 SV=1	NA	1.69257	1.31966	0.0491785	0.372901	-0.323722	1.64339	1.35294	1.07651	0.00991918	0.266321	0.0782462	1.30736
P50750	CDK9	Cyclin-dependent kinase 9 OS=Homo sapiens OX=9606 GN=CDK9 PE=1 SV=3	NA	1.55852	1.67513	0.0701456	-0.116618	0.186764	1.48837	1.33176	1.79047	0.0126066	0.0449016	0.0448875	1.36325
P50914	RPL14	60S ribosomal protein L14 OS=Homo sapiens OX=9606 GN=RPL14 PE=1 SV=4	NA	0.93418	2.05498	-0.889301	-1.1208	0.231499	1.82348	0.812641	2.63284	0.246818	0.64865	0.0334519	1.64831
P50990	CCT8	T-complex protein 1 subunit theta OS=Homo sapiens OX=9606 GN=CCT8 PE=1 SV=4	NA	1.44226	0.597413	2.19215	0.844846	1.34731	-0.749895	1.89704	0.723576	1.691	0.598131	0.693869	0.826436
P50991	CCT4	T-complex protein 1 subunit delta OS=Homo sapiens OX=9606 GN=CCT4 PE=1 SV=4	NA	0.770257	0.214775	-0.0933452	0.555481	-0.648827	0.863602	0.8692	0.190911	0.017791	0.347229	0.147262	0.781763
P51114	FXR1	Fragile X mental retardation syndrome-related protein 1 OS=Homo sapiens OX=9606 GN=FXR1 PE=1 SV=3	NA	2.02534	1.83189	0.124016	0.193454	-0.0694378	1.90133	2.46964	1.96284	0.0348889	0.0565728	0.0127368	2.37438
P51116	FXR2	Fragile X mental retardation syndrome-related protein 2 OS=Homo sapiens OX=9606 GN=FXR2 PE=1 SV=2	NA	0.625972	0.686354	-0.0492262	-0.0603823	0.0111561	0.675198	0.586212	0.75772	0.00801317	0.0167422	0.00477198	0.723955
P51148	RAB5C	Ras-related protein Rab-5C OS=Homo sapiens OX=9606 GN=RAB5C PE=1 SV=2	NA	1.01926	1.18369	0.197335	-0.164426	0.36176	0.82193	0.565668	0.920413	0.0382719	0.0455477	0.0934944	0.551137
P51149	RAB7A	Ras-related protein Rab-7a OS=Homo sapiens OX=9606 GN=RAB7A PE=1 SV=1	NA	0.980266	0.741165	-0.146722	0.239101	-0.385823	1.12699	0.810283	0.600425	0.0348889	0.126541	0.0675567	0.801668
P51532	SMARCA4	Transcription activator BRG1 OS=Homo sapiens OX=9606 GN=SMARCA4 PE=1 SV=2	NA	0.924377	1.02929	0.432695	-0.104914	0.53761	0.491681	0.886597	1.20195	0.138568	0.0319197	0.126505	0.463664
P51571	SSR4	Translocon-associated protein subunit delta OS=Homo sapiens OX=9606 GN=SSR4 PE=1 SV=1	NA	2.55913	0.734086	1.26818	1.82505	-0.556866	1.29095	1.10788	0.123813	0.47101	0.261742	0.0265969	0.478517
P51610	HCFC1	Host cell factor 1 OS=Homo sapiens OX=9606 GN=HCFC1 PE=1 SV=2	NA	-1.41565	-1.17376	-0.0239322	-0.24189	0.217958	-1.39172	0.904086	0.703021	0.00407757	0.0360653	0.0228278	0.93705
P51648	ALDH3A2	Aldehyde dehydrogenase family 3 member A2 OS=Homo sapiens OX=9606 GN=ALDH3A2 PE=1 SV=1	NA	1.44922	1.89198	0.209739	-0.442757	0.652496	1.23949	0.907002	1.14808	0.0348889	0.190745	0.0675567	0.541129
P51659	HSD17B4	Peroxisomal multifunctional enzyme type 2 OS=Homo sapiens OX=9606 GN=HSD17B4 PE=1 SV=3	NA	0.185284	0.156345	0.426984	0.0289396	0.398044	-0.2417	0.127015	0.0993166	0.138568	0.00889038	0.0675567	0.195183
P52209	PGD	6-phosphogluconate dehydrogenase, decarboxylating OS=Homo sapiens OX=9606 GN=PGD PE=1 SV=3	NA	-0.0135209	-0.430074	0.170966	0.416553	-0.245587	-0.184487	0.00253584	0.196996	0.0181919	0.132886	0.0261385	0.0559231
P52272	HNRNPM	Heterogeneous nuclear ribonucleoprotein M OS=Homo sapiens OX=9606 GN=HNRNPM PE=1 SV=3	NA	0.395359	-0.534907	0.297911	0.930266	-0.632355	0.0974474	0.298842	0.764036	0.0645153	0.598131	0.172668	0.0559135
P52292	KPNA2	Importin subunit alpha-1 OS=Homo sapiens OX=9606 GN=KPNA2 PE=1 SV=1	NA	0.6481	-1.74022	0.37344	2.38832	-2.01488	0.27466	0.48211	1.5937	0.0474947	0.977375	0.357406	0.109432
P52565	ARHGDIA	Rho GDP-dissociation inhibitor 1 OS=Homo sapiens OX=9606 GN=ARHGDIA PE=1 SV=3	NA	1.06991	0.95702	0.164007	0.11289	0.0511169	0.905903	0.940902	0.8769	0.0382719	0.0449016	0.0127368	0.742589
P52701	MSH6	DNA mismatch repair protein Msh6 OS=Homo sapiens OX=9606 GN=MSH6 PE=1 SV=2	NA	1.93861	1.68602	0.339202	0.252585	0.086617	1.59941	1.95993	1.50792	0.0781275	0.0604103	0.0127368	1.67739
P52907	CAPZA1	F-actin-capping protein subunit alpha-1 OS=Homo sapiens OX=9606 GN=CAPZA1 PE=1 SV=3	NA	-0.471119	-0.417642	-0.347492	-0.0534768	-0.294015	-0.123628	0.390656	0.356039	0.0944472	0.0211671	0.0471755	0.0585768
P53007	SLC25A1	Tricarboxylate transport protein, mitochondrial OS=Homo sapiens OX=9606 GN=SLC25A1 PE=1 SV=2	NA	1.28806	2.24728	-0.583061	-0.959219	0.376157	1.87112	1.74056	3.29732	0.259769	0.843105	0.0997566	2.33963
P53350	PLK1	Serine/threonine-protein kinase PLK1 OS=Homo sapiens OX=9606 GN=PLK1 PE=1 SV=1	NA	1.38065	1.34857	-0.851115	0.0320827	-0.883197	2.23176	1.10418	0.825628	0.400262	0.00811579	0.161848	2.09333
P53396	ACLY	ATP-citrate synthase OS=Homo sapiens OX=9606 GN=ACLY PE=1 SV=3	NA	0.427412	0.399034	-0.040196	0.0283783	-0.0685743	0.467608	0.400692	0.335085	0.00621506	0.0109971	0.0127368	0.344178
P53618	COPB1	Coatomer subunit beta OS=Homo sapiens OX=9606 GN=COPB1 PE=1 SV=3	NA	-0.970907	-0.0847383	-0.394918	-0.886168	0.49125	-0.575989	0.565086	0.0461342	0.0574086	0.357002	0.0677251	0.301764
P53621	COPA	Coatomer subunit alpha OS=Homo sapiens OX=9606 GN=COPA PE=1 SV=2	NA	1.27097	2.04239	-0.276049	-0.771424	0.495375	1.54702	1.79887	3.22706	0.0465973	0.628193	0.0675567	1.27509
P53985	SLC16A1	Monocarboxylate transporter 1 OS=Homo sapiens OX=9606 GN=SLC16A1 PE=1 SV=3	NA	0.754369	1.0801	-0.596522	-0.325727	-0.270795	1.35089	0.407206	0.802905	0.197427	0.142034	0.0675567	0.972303
P54132	BLM	Bloom syndrome protein OS=Homo sapiens OX=9606 GN=BLM PE=1 SV=1	NA	1.23528	0.958089	-0.348705	0.277189	-0.625894	1.58398	0.826756	0.579444	0.125591	0.0974324	0.134158	1.23771
P54136	RARS	Arginine--tRNA ligase, cytoplasmic OS=Homo sapiens OX=9606 GN=RARS PE=1 SV=2	NA	2.13017	2.10221	0.205916	0.0279588	0.177957	1.92425	2.372	2.91347	0.0598323	0.0151929	0.0396194	2.21436
P54577	YARS	Tyrosine--tRNA ligase, cytoplasmic OS=Homo sapiens OX=9606 GN=YARS PE=1 SV=4	NA	1.2386	0.907568	0.27749	0.331028	-0.0535382	0.961106	1.82103	1.20195	0.0781275	0.176536	0.0106635	0.962039
P54578	USP14	Ubiquitin carboxyl-terminal hydrolase 14 OS=Homo sapiens OX=9606 GN=USP14 PE=1 SV=3	NA	-0.810737	0.232616	-0.549433	-1.04335	0.49392	-0.261304	0.541742	0.128934	0.148334	0.663464	0.0838771	0.119812
P54709	ATP1B3	Sodium/potassium-transporting ATPase subunit beta-3 OS=Homo sapiens OX=9606 GN=ATP1B3 PE=1 SV=1	NA	1.16387	1.28209	-0.520887	-0.118216	-0.402671	1.68476	1.18703	1.17649	0.190319	0.0319197	0.0675567	1.9662
P54886	ALDH18A1	Delta-1-pyrroline-5-carboxylate synthase OS=Homo sapiens OX=9606 GN=ALDH18A1 PE=1 SV=2	NA	-0.424635	0.103544	-0.893755	-0.528179	-0.365576	0.46912	0.293566	0.0754516	0.298814	0.201243	0.0677251	0.45256
P55010	EIF5	Eukaryotic translation initiation factor 5 OS=Homo sapiens OX=9606 GN=EIF5 PE=1 SV=2	NA	-0.947402	-1.38831	-1.01879	0.440906	-1.45969	0.0713847	0.917652	1.82144	0.37237	0.237824	0.65398	0.0367271
P55060	CSE1L	Exportin-2 OS=Homo sapiens OX=9606 GN=CSE1L PE=1 SV=3	NA	1.05319	0.993769	-0.00299522	0.0594175	-0.0624127	1.05618	1.09881	1.05373	0.00202044	0.0173201	0.0127368	0.988058
P55072	VCP	Transitional endoplasmic reticulum ATPase OS=Homo sapiens OX=9606 GN=VCP PE=1 SV=4	NA	1.07377	0.177628	0.334366	0.896139	-0.561773	0.739401	0.821449	0.146406	0.0448038	0.416507	0.0713647	0.439803
P55084	HADHB	Trifunctional enzyme subunit beta, mitochondrial OS=Homo sapiens OX=9606 GN=HADHB PE=1 SV=3	NA	2.52116	2.77143	0.653935	-0.250271	0.904206	1.86722	2.42804	3.00068	0.246818	0.137649	0.283904	1.71399
P55196	AFDN	Afadin OS=Homo sapiens OX=9606 GN=AFDN PE=1 SV=3	NA	-0.987329	-1.61791	0.062864	0.630581	-0.567717	-1.05019	0.83855	1.86838	0.00770647	0.267024	0.0899111	0.858369
P55209	NAP1L1	Nucleosome assembly protein 1-like 1 OS=Homo sapiens OX=9606 GN=NAP1L1 PE=1 SV=1	NA	1.78541	2.49436	-0.234145	-0.708945	0.474801	2.01955	1.20999	2.05437	0.0392924	0.428895	0.0829232	1.36552
P55265	ADAR	Double-stranded RNA-specific adenosine deaminase OS=Homo sapiens OX=9606 GN=ADAR PE=1 SV=4	NA	0.0500589	0.585686	-0.338981	-0.535627	0.196647	0.38904	0.0379717	0.921026	0.138568	0.444286	0.0461368	0.374331
P55786	NPEPPS	Puromycin-sensitive aminopeptidase OS=Homo sapiens OX=9606 GN=NPEPPS PE=1 SV=2	NA	0.828162	0.937971	0.404727	-0.109809	0.514536	0.423435	0.646935	0.780179	0.149038	0.044386	0.120304	0.251925
P55884	EIF3B	Eukaryotic translation initiation factor 3 subunit B OS=Homo sapiens OX=9606 GN=EIF3B PE=1 SV=3	NA	-0.222591	-0.272618	0.0580265	0.0500271	0.00799937	-0.280618	0.153107	0.242718	0.00933384	0.0167422	0.00463192	0.178531
P56134	ATP5MF	ATP synthase subunit f, mitochondrial OS=Homo sapiens OX=9606 GN=ATP5MF PE=1 SV=3	NA	0.218005	0.737565	-0.661468	-0.51956	-0.141908	0.879473	0.126817	0.762102	0.235369	0.279254	0.0261385	0.762174
P56182	RRP1	Ribosomal RNA processing protein 1 homolog A OS=Homo sapiens OX=9606 GN=RRP1 PE=1 SV=1	NA	2.73693	3.17952	-0.0238056	-0.442595	0.41879	2.76073	2.92805	4.04234	0.00407757	0.279254	0.132424	3.29171
P56192	MARS	Methionine--tRNA ligase, cytoplasmic OS=Homo sapiens OX=9606 GN=MARS PE=1 SV=2	NA	1.92919	2.01192	-0.380792	-0.0827339	-0.298058	2.30998	2.28864	2.72193	0.150231	0.0346695	0.0677251	2.79493
P60174	TPI1	Triosephosphate isomerase OS=Homo sapiens OX=9606 GN=TPI1 PE=1 SV=3	NA	1.31234	0.000931776	0.67788	1.3114	-0.633524	0.634455	0.837795	0.000536829	0.123527	0.472288	0.10618	0.422355
P60228	EIF3E	Eukaryotic translation initiation factor 3 subunit E OS=Homo sapiens OX=9606 GN=EIF3E PE=1 SV=1	NA	0.583729	0.672433	-0.506805	-0.0887037	-0.418101	1.09053	0.379154	0.749194	0.0947977	0.0176197	0.0645645	0.945102
P60468	SEC61B	Protein transport protein Sec61 subunit beta OS=Homo sapiens OX=9606 GN=SEC61B PE=1 SV=2	NA	-0.72187	-1.03022	-1.05643	0.308354	-1.36479	0.334563	0.240859	0.805737	0.140167	0.0452038	0.251933	0.135849
P60842	EIF4A1	Eukaryotic initiation factor 4A-I OS=Homo sapiens OX=9606 GN=EIF4A1 PE=1 SV=1	NA	1.3301	1.23656	-0.037381	0.093538	-0.130919	1.36748	0.622838	1.48005	0.00407757	0.0154241	0.0228278	1.2862
P60866	RPS20	40S ribosomal protein S20 OS=Homo sapiens OX=9606 GN=RPS20 PE=1 SV=1	NA	0.943125	1.69283	0.0534039	-0.7497	0.803104	0.889722	1.11113	1.13108	0.00621506	0.207694	0.0782462	0.704412
P60891	PRPS1	Ribose-phosphate pyrophosphokinase 1 OS=Homo sapiens OX=9606 GN=PRPS1 PE=1 SV=2	NA	0.32071	0.443951	0.0252693	-0.123241	0.14851	0.295441	0.233519	0.422179	0.00407757	0.0573363	0.0243878	0.162467
P60900	PSMA6	Proteasome subunit alpha type-6 OS=Homo sapiens OX=9606 GN=PSMA6 PE=1 SV=1	NA	0.807822	1.27354	0.0554171	-0.465717	0.521134	0.752405	0.659263	1.39713	0.0106549	0.292121	0.195563	0.645054
P60953	CDC42	Cell division control protein 42 homolog OS=Homo sapiens OX=9606 GN=CDC42 PE=1 SV=2	NA	0.0584167	-0.337382	0.134669	0.395799	-0.26113	-0.0762526	0.0341852	0.363044	0.0348889	0.233946	0.0541186	0.0435148
P61026	RAB10	Ras-related protein Rab-10 OS=Homo sapiens OX=9606 GN=RAB10 PE=1 SV=1	NA	-0.939704	-1.12836	-0.232468	0.188659	-0.421127	-0.707236	0.934889	1.02134	0.054818	0.0673126	0.0675567	0.509057
P61081	UBE2M	NEDD8-conjugating enzyme Ubc12 OS=Homo sapiens OX=9606 GN=UBE2M PE=1 SV=1	NA	1.08807	1.37969	-0.163008	-0.291618	0.12861	1.25108	0.47305	1.06847	0.017791	0.0573363	0.0228278	0.801668
P61163	ACTR1A	Alpha-centractin OS=Homo sapiens OX=9606 GN=ACTR1A PE=1 SV=1	NA	0.844631	1.115	-0.321147	-0.270372	-0.0507751	1.16578	0.567083	0.805737	0.0781275	0.0624068	0.00855823	1.13074
P61221	ABCE1	ATP-binding cassette sub-family E member 1 OS=Homo sapiens OX=9606 GN=ABCE1 PE=1 SV=1	NA	0.143659	1.27557	-1.26913	-1.13191	-0.137215	1.41279	0.120515	0.992283	0.41863	0.447271	0.0149444	1.25414
P61247	RPS3A	40S ribosomal protein S3a OS=Homo sapiens OX=9606 GN=RPS3A PE=1 SV=2	NA	0.506172	0.740618	0.0208781	-0.234446	0.255324	0.485294	0.50387	1.02975	0.00407757	0.138989	0.0677251	0.454408
P61254	RPL26	60S ribosomal protein L26 OS=Homo sapiens OX=9606 GN=RPL26 PE=1 SV=1	NA	0.412114	0.428229	0.14129	-0.0161153	0.157405	0.270824	0.290806	0.306204	0.0375329	0.00747037	0.0261385	0.146778
P61313	RPL15	60S ribosomal protein L15 OS=Homo sapiens OX=9606 GN=RPL15 PE=1 SV=2	NA	-0.619353	-0.360461	-0.26748	-0.258892	-0.00858803	-0.351873	0.625667	0.352934	0.0834804	0.131852	0.00463192	0.270235
P61353	RPL27	60S ribosomal protein L27 OS=Homo sapiens OX=9606 GN=RPL27 PE=1 SV=2	NA	0.224153	0.270562	0.573017	-0.046409	0.619426	-0.348864	0.146812	0.192555	0.150231	0.0154252	0.102463	0.190058
P61513	RPL37A	60S ribosomal protein L37a OS=Homo sapiens OX=9606 GN=RPL37A PE=1 SV=2	NA	-1.11296	-1.52449	0.533265	0.411537	0.121728	-1.64622	0.934889	1.54463	0.192404	0.199094	0.0243878	1.58257
P61626	LYZ	Lysozyme C OS=Homo sapiens OX=9606 GN=LYZ PE=1 SV=1	NA	-0.00399885	-1.24148	0.164218	1.23748	-1.07326	-0.168217	0.00168776	0.558473	0.0382719	0.308937	0.120304	0.0945282
P61764	STXBP1	Syntaxin-binding protein 1 OS=Homo sapiens OX=9606 GN=STXBP1 PE=1 SV=1	NA	-0.148238	-0.00886502	-0.924619	-0.139373	-0.785246	0.776381	0.0918384	0.00497228	0.316912	0.0564786	0.251933	0.679152
P61927	RPL37	60S ribosomal protein L37 OS=Homo sapiens OX=9606 GN=RPL37 PE=1 SV=2	NA	-3.00497	-2.97537	-0.394836	-0.029594	-0.365242	-2.61013	2.42804	2.82767	0.113629	0.0120649	0.0675567	2.22668
P61956	SUMO2	Small ubiquitin-related modifier 2 OS=Homo sapiens OX=9606 GN=SUMO2 PE=1 SV=3	NA	-1.44895	-0.741005	-0.475619	-0.707947	0.232328	-0.973333	1.01023	0.391952	0.222944	0.409869	0.0381978	0.618925
P61978	HNRNPK	Heterogeneous nuclear ribonucleoprotein K OS=Homo sapiens OX=9606 GN=HNRNPK PE=1 SV=1	NA	0.591688	0.147421	-0.491737	0.444267	-0.936004	1.08343	0.570377	0.139714	0.149038	0.261742	0.348953	1.11428
P62081	RPS7	40S ribosomal protein S7 OS=Homo sapiens OX=9606 GN=RPS7 PE=1 SV=1	NA	2.05932	1.12954	0.743493	0.929779	-0.186285	1.31582	2.19507	1.55586	0.224091	0.598131	0.0265969	1.18112
P62191	PSMC1	26S proteasome regulatory subunit 4 OS=Homo sapiens OX=9606 GN=PSMC1 PE=1 SV=1	NA	0.138573	-0.541345	0.242294	0.679918	-0.437624	-0.103721	0.0557013	0.275593	0.0382719	0.210641	0.0515779	0.0435148
P62195	PSMC5	26S proteasome regulatory subunit 8 OS=Homo sapiens OX=9606 GN=PSMC5 PE=1 SV=1	NA	0.0635954	-1.51509	0.575504	1.57869	-1.00318	-0.511908	0.0419012	2.44365	0.223391	1.35509	0.357406	0.441679
P62241	RPS8	40S ribosomal protein S8 OS=Homo sapiens OX=9606 GN=RPS8 PE=1 SV=2	NA	-1.4453	-1.3867	-0.0329047	-0.0585996	0.0256949	-1.4124	1.79887	1.88616	0.00621506	0.0206111	0.00503617	1.69611
P62244	RPS15A	40S ribosomal protein S15a OS=Homo sapiens OX=9606 GN=RPS15A PE=1 SV=2	NA	0.898339	1.3918	0.373859	-0.493459	0.867317	0.52448	0.950955	1.81816	0.109793	0.264868	0.262545	0.420315
P62249	RPS16	40S ribosomal protein S16 OS=Homo sapiens OX=9606 GN=RPS16 PE=1 SV=2	NA	1.0961	NA	-0.895982	-1.08912	0.193134	NA	1.18276	NA	0.298483	0.618683	0.0282068	NA
P62249	RPS16	40S ribosomal protein S16 OS=Homo sapiens OX=9606 GN=RPS16 PE=1 SV=2	ribosome mRNA entry tunnel	NA	2.18521	NA	NA	NA	1.99208	NA	3.03449	NA	NA	NA	2.22748
P62258	YWHAE	14-3-3 protein epsilon OS=Homo sapiens OX=9606 GN=YWHAE PE=1 SV=1	NA	1.94941	1.70033	-0.455519	0.249084	-0.704603	2.40493	1.74056	2.21434	0.0784546	0.0631207	0.103273	2.16683
P62263	RPS14	40S ribosomal protein S14 OS=Homo sapiens OX=9606 GN=RPS14 PE=1 SV=3	NA	NA	NA	-0.477362	-0.524824	0.0474623	NA	NA	NA	0.197427	0.363985	0.0127368	NA
P62263	RPS14	40S ribosomal protein S14 OS=Homo sapiens OX=9606 GN=RPS14 PE=1 SV=3	ribosome mRNA entry tunnel	1.74766	2.27249	NA	NA	NA	2.22503	2.18365	3.23703	NA	NA	NA	2.72162
P62266	RPS23	40S ribosomal protein S23 OS=Homo sapiens OX=9606 GN=RPS23 PE=1 SV=3	NA	0.03361	-0.0360496	0.468519	0.0696596	0.398859	-0.434909	0.0164992	0.0228476	0.149038	0.0204492	0.0921889	0.366735
P62269	RPS18	40S ribosomal protein S18 OS=Homo sapiens OX=9606 GN=RPS18 PE=1 SV=3	NA	1.45075	-0.920885	-0.240411	2.37163	-2.61204	1.69116	1.57905	0.255487	0.068037	0.463608	0.297559	1.76727
P62273	RPS29	40S ribosomal protein S29 OS=Homo sapiens OX=9606 GN=RPS29 PE=1 SV=2	NA	-1.12908	-2.10628	0.113073	0.977198	-0.864125	-1.24216	1.09818	2.21248	0.0212566	0.663464	0.182556	0.960482
P62277	RPS13	40S ribosomal protein S13 OS=Homo sapiens OX=9606 GN=RPS13 PE=1 SV=2	NA	0.933787	1.07057	0.134959	-0.136782	0.271741	0.798827	1.01956	1.46273	0.0332432	0.0530594	0.0461368	0.712178
P62280	RPS11	40S ribosomal protein S11 OS=Homo sapiens OX=9606 GN=RPS11 PE=1 SV=3	NA	1.97406	2.21771	0.712818	-0.243649	0.956467	1.26124	2.16975	1.94797	0.241998	0.059276	0.161848	1.2565
P62304	SNRPE	Small nuclear ribonucleoprotein E OS=Homo sapiens OX=9606 GN=SNRPE PE=1 SV=1	NA	-0.745691	-0.977628	-0.721619	0.231937	-0.953556	-0.0240723	0.573494	1.10264	0.246818	0.0925009	0.357406	0.0120261
P62314	SNRPD1	Small nuclear ribonucleoprotein Sm D1 OS=Homo sapiens OX=9606 GN=SNRPD1 PE=1 SV=1	NA	0.809623	2.83159	0.523322	-2.02197	2.54529	0.286301	0.217274	1.33558	0.0416387	0.360344	0.348953	0.0874951
P62316	SNRPD2	Small nuclear ribonucleoprotein Sm D2 OS=Homo sapiens OX=9606 GN=SNRPD2 PE=1 SV=1	NA	0.0792077	-0.951634	0.402257	1.03084	-0.628585	-0.323049	0.0270689	0.787838	0.0463545	0.320649	0.0675567	0.13247
P62318	SNRPD3	Small nuclear ribonucleoprotein Sm D3 OS=Homo sapiens OX=9606 GN=SNRPD3 PE=1 SV=1	NA	1.47919	3.19817	-1.36691	-1.71899	0.352073	2.8461	1.57949	2.66861	0.316912	0.789629	0.0279796	1.95801
P62424	RPL7A	60S ribosomal protein L7a OS=Homo sapiens OX=9606 GN=RPL7A PE=1 SV=2	NA	1.12627	2.04024	-0.163502	-0.913968	0.750465	1.28977	1.48661	2.80656	0.0375329	0.739623	0.165903	1.16509
P62491	RAB11A	Ras-related protein Rab-11A OS=Homo sapiens OX=9606 GN=RAB11A PE=1 SV=3	NA	1.34731	1.34313	-0.605506	0.00417588	-0.609682	1.95281	1.11113	0.940861	0.155841	0.000850495	0.0721191	2.2402
P62495	ETF1	Eukaryotic peptide chain release factor subunit 1 OS=Homo sapiens OX=9606 GN=ETF1 PE=1 SV=3	NA	-0.000629758	-0.773308	-0.123519	0.772679	-0.896198	0.12289	0.000173458	0.531754	0.0240824	0.36554	0.161848	0.0535359
P62701	RPS4X	40S ribosomal protein S4, X isoform OS=Homo sapiens OX=9606 GN=RPS4X PE=1 SV=2	NA	0.80156	1.02619	-0.208967	-0.224635	0.0156683	1.01053	0.79733	1.36063	0.0474947	0.101296	0.0049824	1.04136
P62736	ACTA2	Actin, aortic smooth muscle OS=Homo sapiens OX=9606 GN=ACTA2 PE=1 SV=1	NA	0.383195	0.956401	-0.0463512	-0.573206	0.526854	0.429546	0.278682	0.924975	0.00933384	0.417408	0.126505	0.278845
P62750	RPL23A	60S ribosomal protein L23a OS=Homo sapiens OX=9606 GN=RPL23A PE=1 SV=1	NA	-1.05359	-1.15309	0.974512	0.0994967	0.875015	-2.02811	1.14542	1.35826	0.49315	0.0491865	0.357406	2.15563
P62753	RPS6	40S ribosomal protein S6 OS=Homo sapiens OX=9606 GN=RPS6 PE=1 SV=1	NA	1.59249	1.4759	0.413807	0.116594	0.297213	1.17868	1.52818	1.50312	0.148122	0.0530594	0.0675567	0.988058
P62805	H4C1	Histone H4 OS=Homo sapiens OX=9606 GN=H4C1 PE=1 SV=2	NA	1.46847	1.82285	0.358871	-0.354375	0.713246	1.1096	0.757109	1.70654	0.0416387	0.0807468	0.124596	0.682465
P62820	RAB1A	Ras-related protein Rab-1A OS=Homo sapiens OX=9606 GN=RAB1A PE=1 SV=3	NA	-0.206369	-0.396345	-0.226308	0.189976	-0.416284	0.0199395	0.122326	0.274196	0.0382719	0.0668862	0.0519615	0.0079522
P62826	RAN	GTP-binding nuclear protein Ran OS=Homo sapiens OX=9606 GN=RAN PE=1 SV=3	NA	0.941433	1.31247	0.195584	-0.371036	0.56662	0.745849	1.2701	2.05227	0.0559741	0.210641	0.178136	0.87402
P62829	RPL23	60S ribosomal protein L23 OS=Homo sapiens OX=9606 GN=RPL23 PE=1 SV=1	NA	1.12973	0.771193	0.518461	0.358538	0.159922	0.611271	1.10465	0.716542	0.211857	0.20788	0.0282068	0.458792
P62841	RPS15	40S ribosomal protein S15 OS=Homo sapiens OX=9606 GN=RPS15 PE=1 SV=2	NA	2.23354	1.03845	2.01605	1.19509	0.820961	0.217494	1.42965	1.14808	0.478672	0.363985	0.193549	0.119812
P62847	RPS24	40S ribosomal protein S24 OS=Homo sapiens OX=9606 GN=RPS24 PE=1 SV=1	NA	-0.447102	-1.78596	0.584332	1.33886	-0.754524	-1.03143	0.390656	0.859295	0.268473	0.330013	0.0675567	1.02478
P62851	RPS25	40S ribosomal protein S25 OS=Homo sapiens OX=9606 GN=RPS25 PE=1 SV=1	NA	-0.289187	-1.05277	0.51644	0.76358	-0.247141	-0.805627	0.177622	1.11545	0.159974	0.41596	0.0448875	0.708675
P62854	RPS26	40S ribosomal protein S26 OS=Homo sapiens OX=9606 GN=RPS26 PE=1 SV=3	NA	0.234233	0.0273067	0.434852	0.206926	0.227926	-0.200619	0.138386	0.0137617	0.123527	0.0866027	0.0366268	0.10208
P62861	FAU	40S ribosomal protein S30 OS=Homo sapiens OX=9606 GN=FAU PE=1 SV=1	NA	-3.96942	-3.87317	-0.331107	-0.0962564	-0.23485	-3.63832	2.92805	3.67825	0.0784546	0.0327374	0.0371446	3.11208
P62888	RPL30	60S ribosomal protein L30 OS=Homo sapiens OX=9606 GN=RPL30 PE=1 SV=2	NA	0.139224	0.0915839	-0.205262	0.0476403	-0.252902	0.344486	0.0891615	0.0491912	0.0559428	0.0154241	0.0381978	0.269417
P62891	RPL39	60S ribosomal protein L39 OS=Homo sapiens OX=9606 GN=RPL39 PE=1 SV=2	NA	-1.04407	-1.07081	-0.610384	0.0267437	-0.637127	-0.433683	0.490754	0.710453	0.117219	0.00651034	0.105723	0.194868
P62899	RPL31	60S ribosomal protein L31 OS=Homo sapiens OX=9606 GN=RPL31 PE=1 SV=1	NA	-0.302459	-0.940028	0.149366	0.637569	-0.488203	-0.451825	0.173354	0.871873	0.0382719	0.36589	0.134158	0.3134
P62906	RPL10A	60S ribosomal protein L10a OS=Homo sapiens OX=9606 GN=RPL10A PE=1 SV=2	NA	0.530209	1.42794	-0.819992	-0.897735	0.0777427	1.3502	0.419425	1.36063	0.246818	0.344668	0.0127368	1.32756
P62910	RPL32	60S ribosomal protein L32 OS=Homo sapiens OX=9606 GN=RPL32 PE=1 SV=2	NA	-0.981475	-1.45439	0.710262	0.472918	0.237345	-1.69174	0.778656	1.39248	0.250466	0.237824	0.0396194	1.52832
P62913	RPL11	60S ribosomal protein L11 OS=Homo sapiens OX=9606 GN=RPL11 PE=1 SV=2	NA	1.38286	1.46784	0.0527695	-0.0849769	0.137746	1.33009	1.57905	1.98116	0.00991918	0.0346695	0.0265969	1.41015
P62917	RPL8	60S ribosomal protein L8 OS=Homo sapiens OX=9606 GN=RPL8 PE=1 SV=2	NA	1.39242	2.62646	-0.494251	-1.23403	0.739784	1.88667	1.33048	3.00513	0.125591	0.845109	0.161848	1.58781
P62937	PPIA	Peptidyl-prolyl cis-trans isomerase A OS=Homo sapiens OX=9606 GN=PPIA PE=1 SV=2	NA	1.67916	1.05145	1.54326	0.627706	0.915553	0.1359	1.0699	0.679024	0.41863	0.169592	0.161848	0.0559231
P62979	RPS27A	Ubiquitin-40S ribosomal protein S27a OS=Homo sapiens OX=9606 GN=RPS27A PE=1 SV=2	NA	-0.595657	-0.835851	0.600243	0.240194	0.360049	-1.1959	0.575201	1.02159	0.27238	0.120893	0.0921889	1.39108
P62987	UBA52	Ubiquitin-60S ribosomal protein L40 OS=Homo sapiens OX=9606 GN=UBA52 PE=1 SV=2	NA	-2.81937	-3.81903	-2.94029	0.999659	-3.93995	0.120921	1.7661	3.23703	0.666196	0.362847	1.04021	0.0364591
P63000	RAC1	Ras-related C3 botulinum toxin substrate 1 OS=Homo sapiens OX=9606 GN=RAC1 PE=1 SV=1	NA	-0.770928	1.2359	-0.0902071	-2.00683	1.91662	-0.680721	0.31429	0.552232	0.00801317	0.852904	0.303252	0.210229
P63104	YWHAZ	14-3-3 protein zeta/delta OS=Homo sapiens OX=9606 GN=YWHAZ PE=1 SV=1	NA	-0.283319	-0.941319	0.0153603	0.658	-0.64264	-0.298679	0.142284	0.592289	0.00363635	0.16786	0.0675567	0.139411
P63173	RPL38	60S ribosomal protein L38 OS=Homo sapiens OX=9606 GN=RPL38 PE=1 SV=2	NA	-0.0834382	-1.28651	1.05654	1.20307	-0.146533	-1.13998	0.0362094	1.23297	0.41863	0.69104	0.0265969	1.00591
P63241	EIF5A	Eukaryotic translation initiation factor 5A-1 OS=Homo sapiens OX=9606 GN=EIF5A PE=1 SV=2	NA	-1.41038	-2.14786	0.011165	0.737479	-0.726314	-1.42155	1.07362	1.75307	0.00363635	0.290663	0.126505	1.12502
P63244	RACK1	Receptor of activated protein C kinase 1 OS=Homo sapiens OX=9606 GN=RACK1 PE=1 SV=3	NA	1.52335	1.09007	0.770643	0.433278	0.337366	0.752706	1.79887	0.81202	0.278762	0.125038	0.037936	0.698407
P67809	YBX1	Y-box-binding protein 1 OS=Homo sapiens OX=9606 GN=YBX1 PE=1 SV=3	NA	-1.0825	-2.95961	1.02064	1.87711	-0.856462	-2.10315	0.724138	3.67825	0.246818	0.845109	0.251933	2.06109
P67870	CSNK2B	Casein kinase II subunit beta OS=Homo sapiens OX=9606 GN=CSNK2B PE=1 SV=1	NA	0.747563	1.58114	-0.443138	-0.833574	0.390436	1.1907	0.588463	1.50312	0.134042	0.342013	0.0675567	1.24091
P68104	EEF1A1	Elongation factor 1-alpha 1 OS=Homo sapiens OX=9606 GN=EEF1A1 PE=1 SV=1	NA	-0.203665	-2.83025	3.72277	2.62658	1.09619	-3.92644	0.154896	1.89196	2.67924	0.852904	0.126505	3.3922
P68133	ACTA1	Actin, alpha skeletal muscle OS=Homo sapiens OX=9606 GN=ACTA1 PE=1 SV=1	NA	-0.81063	-1.50218	0.425075	0.69155	-0.266475	-1.2357	0.390656	1.25076	0.0781275	0.174855	0.0411206	1.17084
P68363	TUBA1B	Tubulin alpha-1B chain OS=Homo sapiens OX=9606 GN=TUBA1B PE=1 SV=1	NA	1.7273	1.12014	0.181622	0.607155	-0.425533	1.54568	2.1211	1.30333	0.0382719	0.316739	0.0675567	1.48159
P68371	TUBB4B	Tubulin beta-4B chain OS=Homo sapiens OX=9606 GN=TUBB4B PE=1 SV=1	NA	2.0564	1.63933	-0.0212269	0.41707	-0.438297	2.07763	2.45213	2.56222	0.00407757	0.290663	0.0782462	2.15563
P68400	CSNK2A1	Casein kinase II subunit alpha OS=Homo sapiens OX=9606 GN=CSNK2A1 PE=1 SV=1	NA	-0.119618	-0.561799	0.451906	0.44218	0.00972604	-0.571525	0.0703518	0.385115	0.145986	0.153934	0.00463192	0.45367
P68871	HBB	Hemoglobin subunit beta OS=Homo sapiens OX=9606 GN=HBB PE=1 SV=2	NA	-1.04977	0.173993	-0.114808	-1.22376	1.10895	-0.934961	0.53924	0.194207	0.00621506	0.36554	0.103222	0.374331
P69905	HBA1	Hemoglobin subunit alpha OS=Homo sapiens OX=9606 GN=HBA1 PE=1 SV=2	NA	-0.516091	0.404028	0.244919	-0.920119	1.16504	-0.76101	0.203101	0.143605	0.0303441	0.361072	0.108606	0.238157
P78316	NOP14	Nucleolar protein 14 OS=Homo sapiens OX=9606 GN=NOP14 PE=1 SV=3	NA	1.28843	1.7459	-0.888617	-0.457468	-0.431149	2.17705	1.52872	1.96213	0.250286	0.167683	0.0564531	2.10998
P78344	EIF4G2	Eukaryotic translation initiation factor 4 gamma 2 OS=Homo sapiens OX=9606 GN=EIF4G2 PE=1 SV=1	NA	0.626339	0.240077	0.3764	0.386262	-0.00986241	0.24994	0.638408	0.217427	0.141969	0.266321	0.00477198	0.176913
P78345	RPP38	Ribonuclease P protein subunit p38 OS=Homo sapiens OX=9606 GN=RPP38 PE=1 SV=2	NA	1.50108	1.57152	0.146437	-0.0704386	0.216876	1.35465	0.992178	1.16432	0.0348945	0.0221317	0.037936	0.899519
P78347	GTF2I	General transcription factor II-I OS=Homo sapiens OX=9606 GN=GTF2I PE=1 SV=2	NA	1.18254	0.765141	-0.276236	0.417396	-0.693632	1.45877	1.23386	0.718148	0.0433275	0.137818	0.0934944	1.23771
P78371	CCT2	T-complex protein 1 subunit beta OS=Homo sapiens OX=9606 GN=CCT2 PE=1 SV=4	NA	1.11335	0.0344529	0.622698	1.0789	-0.4562	0.490652	1.25951	0.0241018	0.223611	0.845109	0.103222	0.374331
P78527	PRKDC	DNA-dependent protein kinase catalytic subunit OS=Homo sapiens OX=9606 GN=PRKDC PE=1 SV=3	NA	1.47353	1.06475	-1.34972	0.408779	-1.7585	2.82325	0.969838	0.490215	0.316912	0.0604103	0.260273	2.84216
P80723	BASP1	Brain acid soluble protein 1 OS=Homo sapiens OX=9606 GN=BASP1 PE=1 SV=2	NA	-0.254993	-0.0668214	0.143916	-0.188172	0.332088	-0.39891	0.120518	0.0272487	0.0254892	0.0530594	0.0396194	0.195666
P81605	DCD	Dermcidin OS=Homo sapiens OX=9606 GN=DCD PE=1 SV=2	NA	0.108718	-0.780314	0.516515	0.889032	-0.372517	-0.407797	0.0590563	1.00659	0.129817	0.472288	0.066478	0.269207
P82650	MRPS22	28S ribosomal protein S22, mitochondrial OS=Homo sapiens OX=9606 GN=MRPS22 PE=1 SV=1	NA	0.463237	0.875287	-0.746324	-0.41205	-0.334274	1.20956	0.390656	0.688277	0.306979	0.153934	0.0461368	1.1539
P82675	MRPS5	28S ribosomal protein S5, mitochondrial OS=Homo sapiens OX=9606 GN=MRPS5 PE=1 SV=2	NA	1.00196	1.32449	-0.265806	-0.322526	0.0567203	1.26777	1.29179	2.12532	0.0472321	0.227168	0.00903387	1.01524
P82912	MRPS11	28S ribosomal protein S11, mitochondrial OS=Homo sapiens OX=9606 GN=MRPS11 PE=1 SV=2	NA	0.32511	0.494457	0.200192	-0.169347	0.369539	0.124918	0.135992	0.280059	0.0382719	0.0458715	0.0731214	0.0559231
P82914	MRPS15	28S ribosomal protein S15, mitochondrial OS=Homo sapiens OX=9606 GN=MRPS15 PE=1 SV=1	NA	0.808835	0.891503	-0.313395	-0.0826678	-0.230727	1.12223	0.950927	1.19129	0.0952603	0.0319197	0.0448875	1.30736
P82930	MRPS34	28S ribosomal protein S34, mitochondrial OS=Homo sapiens OX=9606 GN=MRPS34 PE=1 SV=2	NA	3.95428	3.71312	0.158533	0.241155	-0.0826211	3.79574	2.92805	3.5315	0.0382719	0.0925009	0.0165084	3.29171
P82933	MRPS9	28S ribosomal protein S9, mitochondrial OS=Homo sapiens OX=9606 GN=MRPS9 PE=1 SV=2	NA	1.80591	2.60699	-0.926956	-0.801081	-0.125875	2.73286	2.34904	3.71217	0.41863	0.69104	0.0261385	3.05965
P83731	RPL24	60S ribosomal protein L24 OS=Homo sapiens OX=9606 GN=RPL24 PE=1 SV=1	NA	-0.347429	-0.583071	0.179412	0.235642	-0.0562301	-0.526841	0.289862	0.622743	0.0439429	0.126541	0.0127368	0.426227
P83881	RPL36A	60S ribosomal protein L36a OS=Homo sapiens OX=9606 GN=RPL36A PE=1 SV=2	NA	-2.08235	-2.13151	-0.310176	0.0491648	-0.359341	-1.77217	2.08636	2.13527	0.0952603	0.0167422	0.0675567	1.63858
P84098	RPL19	60S ribosomal protein L19 OS=Homo sapiens OX=9606 GN=RPL19 PE=1 SV=1	NA	-1.03662	-1.4227	0.0340353	0.386082	-0.352047	-1.07066	0.885663	1.57454	0.00504377	0.237061	0.0721191	0.891019
Q00325	SLC25A3	Phosphate carrier protein, mitochondrial OS=Homo sapiens OX=9606 GN=SLC25A3 PE=1 SV=2	NA	0.283394	0.72038	-0.448755	-0.436986	-0.0117689	0.732148	0.277298	0.869457	0.191031	0.248791	0.00477198	0.801668
Q00610	CLTC	Clathrin heavy chain 1 OS=Homo sapiens OX=9606 GN=CLTC PE=1 SV=5	NA	0.221203	-0.0376477	0.766135	0.258851	0.507284	-0.544932	0.178771	0.0268689	0.259698	0.119783	0.0921889	0.431949
Q00839	HNRNPU	Heterogeneous nuclear ribonucleoprotein U OS=Homo sapiens OX=9606 GN=HNRNPU PE=1 SV=6	NA	0.403164	2.16498	-1.75279	-1.76182	0.00902376	2.15596	0.228472	2.10996	0.666196	0.816284	0.00463192	2.13191
Q01469	FABP5	Fatty acid-binding protein 5 OS=Homo sapiens OX=9606 GN=FABP5 PE=1 SV=3	NA	0.152963	-0.030018	-0.600962	0.182981	-0.783943	0.753925	0.108628	0.0181688	0.230555	0.0729117	0.251152	0.704412
Q01518	CAP1	Adenylyl cyclase-associated protein 1 OS=Homo sapiens OX=9606 GN=CAP1 PE=1 SV=5	NA	0.505416	-1.16278	1.30429	1.66819	-0.363904	-0.798874	0.208522	0.429967	0.395395	0.466367	0.0265969	0.36147
Q01546	NA	SWISS-PROT:Q01546 Tax_Id=9606 Gene_Symbol=KRT76 Keratin, type II cytoskeletal 2 oral	NA	0.652454	-0.410072	0.407256	1.06253	-0.65527	0.245197	0.437995	0.115707	0.117841	0.21473	0.0461368	0.116581
Q01650	SLC7A5	Large neutral amino acids transporter small subunit 1 OS=Homo sapiens OX=9606 GN=SLC7A5 PE=1 SV=2	NA	0.687585	0.809469	0.136807	-0.121885	0.258691	0.550778	0.387913	0.552232	0.0348889	0.0360653	0.052356	0.33336
Q01780	EXOSC10	Exosome component 10 OS=Homo sapiens OX=9606 GN=EXOSC10 PE=1 SV=2	NA	1.54315	2.66294	-0.783076	-1.11978	0.336709	2.32623	1.80028	3.71217	0.315161	0.772592	0.0838771	2.91531
Q01813	PFKP	ATP-dependent 6-phosphofructokinase, platelet type OS=Homo sapiens OX=9606 GN=PFKP PE=1 SV=2	NA	0.313708	-0.160338	0.0610164	0.474045	-0.413029	0.252691	0.116361	0.0726398	0.00621506	0.107877	0.0675567	0.139411
Q01831	XPC	DNA repair protein complementing XP-C cells OS=Homo sapiens OX=9606 GN=XPC PE=1 SV=4	NA	-2.06178	0.316342	-1.684	-2.37812	0.694115	-0.377774	1.05004	0.163853	0.327269	0.832296	0.123689	0.161598
Q02040	AKAP17A	A-kinase anchor protein 17A OS=Homo sapiens OX=9606 GN=AKAP17A PE=1 SV=2	NA	0.851886	1.37338	-0.806235	-0.521492	-0.284743	1.65812	0.489636	0.796765	0.131738	0.095336	0.0228278	1.11209
Q02241	KIF23	Kinesin-like protein KIF23 OS=Homo sapiens OX=9606 GN=KIF23 PE=1 SV=3	NA	-0.106701	0.10563	-0.291959	-0.212331	-0.079628	0.185258	0.0419012	0.048739	0.0598323	0.0587708	0.0146062	0.0945282
Q02413	DSG1	Desmoglein-1 OS=Homo sapiens OX=9606 GN=DSG1 PE=1 SV=2	NA	0.229922	-0.711295	0.387178	0.941217	-0.554039	-0.157256	0.136923	0.555525	0.0950999	0.472288	0.0787282	0.0787214
Q02543	RPL18A	60S ribosomal protein L18a OS=Homo sapiens OX=9606 GN=RPL18A PE=1 SV=2	NA	-0.458207	-0.293899	-0.0543526	-0.164308	0.109955	-0.403854	0.428256	0.324701	0.00991918	0.0807468	0.0261385	0.345421
Q02790	FKBP4	Peptidyl-prolyl cis-trans isomerase FKBP4 OS=Homo sapiens OX=9606 GN=FKBP4 PE=1 SV=3	NA	1.20811	0.530201	0.224617	0.677905	-0.453288	0.983489	1.20999	0.415996	0.0559428	0.349568	0.0829232	0.916057
Q02878	RPL6	60S ribosomal protein L6 OS=Homo sapiens OX=9606 GN=RPL6 PE=1 SV=3	NA	-0.68626	-1.0045	0.589187	0.31824	0.270948	-1.27545	0.822474	1.3332	0.261947	0.182477	0.0602307	1.50259
Q02880	TOP2B	DNA topoisomerase 2-beta OS=Homo sapiens OX=9606 GN=TOP2B PE=1 SV=3	NA	0.346723	0.515248	-0.05701	-0.168525	0.111515	0.403733	0.293566	0.68421	0.00991918	0.0668862	0.0243878	0.355436
Q02978	SLC25A11	Mitochondrial 2-oxoglutarate/malate carrier protein OS=Homo sapiens OX=9606 GN=SLC25A11 PE=1 SV=3	NA	0.662916	2.45311	0.443304	-1.79019	2.2335	0.219612	0.348455	3.46252	0.0382719	0.69104	0.324544	0.0605267
Q03468	ERCC6	DNA excision repair protein ERCC-6 OS=Homo sapiens OX=9606 GN=ERCC6 PE=1 SV=1	NA	1.58489	0.785394	0.176533	0.799499	-0.622966	1.40836	1.30781	0.545593	0.0465973	0.464908	0.182556	1.20639
Q03701	CEBPZ	CCAAT/enhancer-binding protein zeta OS=Homo sapiens OX=9606 GN=CEBPZ PE=1 SV=3	NA	1.00072	1.35744	0.486767	-0.356722	0.843489	0.513954	1.28359	2.03602	0.148334	0.223248	0.251933	0.381887
Q04637	EIF4G1	Eukaryotic translation initiation factor 4 gamma 1 OS=Homo sapiens OX=9606 GN=EIF4G1 PE=1 SV=4	NA	-1.36215	-1.81255	-1.02714	0.450396	-1.47754	-0.335012	1.67436	2.62697	0.297265	0.314479	0.357406	0.166693
Q04695	NA	SWISS-PROT:Q04695 Tax_Id=9606 Gene_Symbol=KRT17 Keratin, type I cytoskeletal 17	NA	0.789912	-1.31303	0.517442	2.10295	-1.5855	0.27247	0.756954	0.620379	0.207557	0.647067	0.251152	0.162896
Q04837	SSBP1	Single-stranded DNA-binding protein, mitochondrial OS=Homo sapiens OX=9606 GN=SSBP1 PE=1 SV=1	NA	0.663773	2.95608	-2.95878	-2.29231	-0.666476	3.62256	0.23431	1.61505	2.22608	1.39483	0.161848	2.15563
Q04917	YWHAH	14-3-3 protein eta OS=Homo sapiens OX=9606 GN=YWHAH PE=1 SV=4	NA	0.876214	0.353368	0.733034	0.522847	0.210188	0.14318	0.797045	0.31286	0.138568	0.35359	0.0228278	0.050892
Q05639	EEF1A2	Elongation factor 1-alpha 2 OS=Homo sapiens OX=9606 GN=EEF1A2 PE=1 SV=1	NA	-0.107525	-0.319239	-0.16893	0.211713	-0.380644	0.061405	0.0478174	0.262873	0.0348889	0.0599075	0.0677251	0.0346524
Q06124	PTPN11	Tyrosine-protein phosphatase non-receptor type 11 OS=Homo sapiens OX=9606 GN=PTPN11 PE=1 SV=2	NA	0.283074	0.376672	-0.0833821	-0.0935984	0.0102163	0.366456	0.119791	0.16937	0.0137071	0.0360653	0.00463192	0.147214
Q06210	GFPT1	Glutamine--fructose-6-phosphate aminotransferase [isomerizing] 1 OS=Homo sapiens OX=9606 GN=GFPT1 PE=1 SV=3	NA	0.631454	0.714362	-0.383325	-0.0829075	-0.300418	1.01478	0.358129	0.445355	0.138568	0.0340794	0.0675567	0.683803
Q06830	PRDX1	Peroxiredoxin-1 OS=Homo sapiens OX=9606 GN=PRDX1 PE=1 SV=1	NA	0.93068	0.921857	-0.00995615	0.00882368	-0.0187798	0.940636	1.23773	1.30333	0.00363635	0.00529114	0.0049824	0.88763
Q07020	RPL18	60S ribosomal protein L18 OS=Homo sapiens OX=9606 GN=RPL18 PE=1 SV=2	NA	-1.27197	-1.25933	-0.204167	-0.0126441	-0.191523	-1.06781	1.46955	1.77699	0.0559428	0.00604799	0.0411206	1.26996
Q07065	CKAP4	Cytoskeleton-associated protein 4 OS=Homo sapiens OX=9606 GN=CKAP4 PE=1 SV=2	NA	-0.2381	-0.154034	0.396764	-0.0840661	0.48083	-0.634864	0.170014	0.120091	0.138568	0.0416537	0.120468	0.515517
Q07666	KHDRBS1	KH domain-containing, RNA-binding, signal transduction-associated protein 1 OS=Homo sapiens OX=9606 GN=KHDRBS1 PE=1 SV=1	NA	1.9929	2.52462	-0.202054	-0.531716	0.329662	2.19495	1.2987	3.07925	0.0218204	0.120893	0.0376857	1.85089
Q08188	TGM3	Protein-glutamine gamma-glutamyltransferase E OS=Homo sapiens OX=9606 GN=TGM3 PE=1 SV=4	NA	0.632758	0.28649	0.393865	0.346268	0.0475968	0.238893	0.473324	0.0993166	0.0574142	0.0624068	0.00503617	0.09457
Q08211	DHX9	ATP-dependent RNA helicase A OS=Homo sapiens OX=9606 GN=DHX9 PE=1 SV=4	NA	1.54784	2.46953	-1.05913	-0.921693	-0.137437	2.60697	2.068	3.71217	0.415738	0.695148	0.0243878	2.84216
Q08945	SSRP1	FACT complex subunit SSRP1 OS=Homo sapiens OX=9606 GN=SSRP1 PE=1 SV=1	NA	1.58971	1.43039	0.09657	0.15932	-0.0627495	1.49314	1.88643	1.17649	0.0181919	0.0399102	0.00903387	1.49548
Q08J23	NSUN2	RNA cytosine C(5)-methyltransferase NSUN2 OS=Homo sapiens OX=9606 GN=NSUN2 PE=1 SV=2	NA	2.70525	2.55453	-0.564732	0.150718	-0.71545	3.26998	2.87876	3.28273	0.230555	0.0527612	0.251933	3.3922
Q09666	AHNAK	Neuroblast differentiation-associated protein AHNAK OS=Homo sapiens OX=9606 GN=AHNAK PE=1 SV=2	NA	-0.886721	-1.92333	1.16004	1.03661	0.123425	-2.04676	0.296691	1.19822	0.149038	0.210641	0.0127368	1.04357
Q10471	GALNT2	Polypeptide N-acetylgalactosaminyltransferase 2 OS=Homo sapiens OX=9606 GN=GALNT2 PE=1 SV=1	NA	0.5754	1.11435	-1.40075	-0.538946	-0.861803	1.97615	0.243113	1.06618	0.326481	0.153934	0.28272	1.65531
Q12788	TBL3	Transducin beta-like protein 3 OS=Homo sapiens OX=9606 GN=TBL3 PE=1 SV=2	NA	0.412313	0.859102	0.441937	-0.446789	0.888726	-0.0296242	0.238296	0.864866	0.119544	0.20788	0.314155	0.0135385
Q12789	GTF3C1	General transcription factor 3C polypeptide 1 OS=Homo sapiens OX=9606 GN=GTF3C1 PE=1 SV=4	NA	-1.77119	1.16217	-2.74628	-2.93337	0.187085	0.97509	0.430315	0.954466	0.312649	0.450558	0.0265969	0.876383
Q12792	TWF1	Twinfilin-1 OS=Homo sapiens OX=9606 GN=TWF1 PE=1 SV=3	NA	2.44393	2.28464	-0.0137355	0.159285	-0.173021	2.45766	1.54863	1.70446	0.00363635	0.0329142	0.0228278	1.64831
Q12830	BPTF	Nucleosome-remodeling factor subunit BPTF OS=Homo sapiens OX=9606 GN=BPTF PE=1 SV=3	NA	0.936408	1.43902	-0.60644	-0.502615	-0.103825	1.54285	0.666289	1.28834	0.246818	0.25565	0.0228278	1.3992
Q12874	SF3A3	Splicing factor 3A subunit 3 OS=Homo sapiens OX=9606 GN=SF3A3 PE=1 SV=1	NA	0.132316	0.286891	0.701751	-0.154575	0.856327	-0.569435	0.0683692	0.209326	0.191557	0.0655353	0.178136	0.311581
Q12894	IFRD2	Interferon-related developmental regulator 2 OS=Homo sapiens OX=9606 GN=IFRD2 PE=1 SV=3	NA	1.89339	1.5991	0.410859	0.294285	0.116574	1.48253	1.82141	2.10622	0.0950999	0.117687	0.0228278	1.41036
Q12904	AIMP1	Aminoacyl tRNA synthase complex-interacting multifunctional protein 1 OS=Homo sapiens OX=9606 GN=AIMP1 PE=1 SV=2	NA	0.704401	1.15611	-0.129275	-0.451711	0.322436	0.833676	0.351232	0.804562	0.0240824	0.227168	0.0628936	0.441195
Q12905	ILF2	Interleukin enhancer-binding factor 2 OS=Homo sapiens OX=9606 GN=ILF2 PE=1 SV=2	NA	1.24912	1.10907	0.0246535	0.140043	-0.115389	1.22446	1.48367	0.822918	0.00407757	0.034042	0.0141056	1.04357
Q12906	ILF3	Interleukin enhancer-binding factor 3 OS=Homo sapiens OX=9606 GN=ILF3 PE=1 SV=3	defense response to virus	1.68909	1.61689	NA	NA	NA	2.08964	1.82141	1.8731	NA	NA	NA	1.76437
Q12906	ILF3	Interleukin enhancer-binding factor 3 OS=Homo sapiens OX=9606 GN=ILF3 PE=1 SV=3	NA	NA	NA	-0.400551	0.0722012	-0.472753	NA	NA	NA	0.073818	0.0173201	0.0612529	NA
Q12931	TRAP1	Heat shock protein 75 kDa, mitochondrial OS=Homo sapiens OX=9606 GN=TRAP1 PE=1 SV=3	NA	0.561093	0.64259	-1.07728	-0.0814967	-0.99578	1.63837	0.390656	0.445355	0.300993	0.0156219	0.170323	1.65918
Q12965	MYO1E	Unconventional myosin-Ie OS=Homo sapiens OX=9606 GN=MYO1E PE=1 SV=2	NA	1.16852	1.54632	-0.327722	-0.377802	0.0500798	1.49624	0.658333	1.16552	0.0833317	0.142034	0.0127368	1.0911
Q13045	FLII	Protein flightless-1 homolog OS=Homo sapiens OX=9606 GN=FLII PE=1 SV=2	NA	1.89145	1.99168	-0.378932	-0.10023	-0.278701	2.27038	1.87836	2.33984	0.149038	0.0485331	0.0721191	2.37438
Q13098	GPS1	COP9 signalosome complex subunit 1 OS=Homo sapiens OX=9606 GN=GPS1 PE=1 SV=4	NA	0.183561	0.532246	0.632946	-0.348685	0.98163	-0.449384	0.139522	0.521054	0.197427	0.154577	0.251933	0.299627
Q13123	IK	Protein Red OS=Homo sapiens OX=9606 GN=IK PE=1 SV=3	NA	-2.64271	-2.61481	-1.88439	-0.0279046	-1.85649	-0.758316	2.87876	3.36169	0.81468	0.0137904	0.775756	0.591525
Q13148	TARDBP	TAR DNA-binding protein 43 OS=Homo sapiens OX=9606 GN=TARDBP PE=1 SV=1	NA	2.2314	1.65013	0.768965	0.581273	0.187692	1.46244	1.45633	1.03585	0.277966	0.325953	0.0276409	0.870054
Q13151	HNRNPA0	Heterogeneous nuclear ribonucleoprotein A0 OS=Homo sapiens OX=9606 GN=HNRNPA0 PE=1 SV=1	NA	1.49453	1.31452	-0.657754	0.180001	-0.837755	2.15228	1.35681	1.29288	0.246818	0.103991	0.270844	1.8357
Q13155	AIMP2	Aminoacyl tRNA synthase complex-interacting multifunctional protein 2 OS=Homo sapiens OX=9606 GN=AIMP2 PE=1 SV=2	NA	3.84925	2.71117	0.688993	1.13808	-0.449091	3.16026	2.92805	2.65612	0.230555	0.52854	0.0675567	3.05965
Q13185	CBX3	Chromobox protein homolog 3 OS=Homo sapiens OX=9606 GN=CBX3 PE=1 SV=4	NA	0.780732	0.436974	0.581161	0.343758	0.237403	0.199571	0.5672	0.275593	0.246818	0.153934	0.0461368	0.106547
Q13200	PSMD2	26S proteasome non-ATPase regulatory subunit 2 OS=Homo sapiens OX=9606 GN=PSMD2 PE=1 SV=3	NA	0.872089	0.494077	0.775268	0.378012	0.397256	0.0968207	0.930682	0.39123	0.315818	0.137649	0.0675567	0.0605113
Q13206	DDX10	Probable ATP-dependent RNA helicase DDX10 OS=Homo sapiens OX=9606 GN=DDX10 PE=1 SV=2	NA	1.89416	2.95129	-0.715227	-1.05714	0.341912	2.60938	2.46964	4.04234	0.344948	0.852904	0.102463	3.25099
Q13263	TRIM28	Transcription intermediary factor 1-beta OS=Homo sapiens OX=9606 GN=TRIM28 PE=1 SV=5	NA	0.60593	-0.4015	-0.560691	1.00743	-1.56812	1.16662	0.348455	0.30679	0.0879912	0.339018	0.329293	0.813354
Q13283	G3BP1	Ras GTPase-activating protein-binding protein 1 OS=Homo sapiens OX=9606 GN=G3BP1 PE=1 SV=1	NA	0.251655	-0.586383	-0.0503783	0.838038	-0.888416	0.302033	0.142209	0.659221	0.00621506	0.422975	0.251933	0.181426
Q13330	MTA1	Metastasis-associated protein MTA1 OS=Homo sapiens OX=9606 GN=MTA1 PE=1 SV=2	NA	0.980522	0.871051	0.331128	0.109471	0.221657	0.649394	0.492356	0.79926	0.0397232	0.0176197	0.0282068	0.433985
Q13347	EIF3I	Eukaryotic translation initiation factor 3 subunit I OS=Homo sapiens OX=9606 GN=EIF3I PE=1 SV=1	NA	NA	NA	0.88214	0.442831	0.439309	0.821503	NA	NA	0.27238	0.310551	0.0675567	0.592487
Q13347	EIF3I	Eukaryotic translation initiation factor 3 subunit I OS=Homo sapiens OX=9606 GN=EIF3I PE=1 SV=1	translation initiation factor (eIF)	1.70364	1.26081	NA	NA	NA	NA	2.15711	1.78677	NA	NA	NA	NA
Q13356	PPIL2	RING-type E3 ubiquitin-protein ligase PPIL2 OS=Homo sapiens OX=9606 GN=PPIL2 PE=1 SV=1	NA	0.407141	1.35544	-0.390191	-0.948301	0.55811	0.797332	0.137566	0.988752	0.0415883	0.326087	0.0675567	0.324062
Q13409	DYNC1I2	Cytoplasmic dynein 1 intermediate chain 2 OS=Homo sapiens OX=9606 GN=DYNC1I2 PE=1 SV=3	NA	0.435558	0.599234	0.424748	-0.163676	0.588424	0.0108098	0.300411	0.513833	0.131738	0.0874031	0.129585	0.00411837
Q13428	TCOF1	Treacle protein OS=Homo sapiens OX=9606 GN=TCOF1 PE=1 SV=3	NA	-0.40766	-0.727375	-0.683798	0.319714	-1.00351	0.276138	0.268622	0.552232	0.167883	0.137649	0.178136	0.118698
Q13435	SF3B2	Splicing factor 3B subunit 2 OS=Homo sapiens OX=9606 GN=SF3B2 PE=1 SV=2	NA	-0.668569	-1.41196	-1.48422	0.743387	-2.2276	0.815649	0.31777	0.797105	0.41545	0.142034	0.510007	0.698989
Q13442	PDAP1	28 kDa heat- and acid-stable phosphoprotein OS=Homo sapiens OX=9606 GN=PDAP1 PE=1 SV=1	NA	-1.00102	-0.421365	-0.0398006	-0.579653	0.539852	-0.961218	0.441282	0.187566	0.00407757	0.107877	0.0381978	0.395568
Q13523	PRPF4B	Serine/threonine-protein kinase PRP4 homolog OS=Homo sapiens OX=9606 GN=PRPF4B PE=1 SV=3	NA	-0.960813	-0.40755	-0.902895	-0.553263	-0.349631	-0.0579187	0.720726	0.308775	0.182637	0.200726	0.0369597	0.0225835
Q13547	HDAC1	Histone deacetylase 1 OS=Homo sapiens OX=9606 GN=HDAC1 PE=1 SV=1	NA	0.912196	1.00318	-0.0798007	-0.0909853	0.0111846	0.991997	0.795146	1.0311	0.017791	0.0374252	0.00477198	0.889175
Q13573	SNW1	SNW domain-containing protein 1 OS=Homo sapiens OX=9606 GN=SNW1 PE=1 SV=1	NA	-2.09578	-2.53955	-0.693386	0.443775	-1.13716	-1.40239	2.42804	3.67825	0.229241	0.267213	0.357406	1.41036
Q13576	IQGAP2	Ras GTPase-activating-like protein IQGAP2 OS=Homo sapiens OX=9606 GN=IQGAP2 PE=1 SV=4	NA	1.57677	0.885092	-0.0664002	0.69168	-0.75808	1.64317	0.9623	0.579444	0.00621506	0.190793	0.102463	1.13846
Q13601	KRR1	KRR1 small subunit processome component homolog OS=Homo sapiens OX=9606 GN=KRR1 PE=1 SV=4	NA	1.18121	1.13264	0.441327	0.0485692	0.392758	0.739879	1.29435	1.29432	0.149038	0.0154241	0.0721191	0.719389
Q13620	CUL4B	Cullin-4B OS=Homo sapiens OX=9606 GN=CUL4B PE=1 SV=4	NA	-0.951519	-1.65215	0.308026	0.700635	-0.392609	-1.25954	0.501302	1.30333	0.0382719	0.172889	0.0389713	0.843006
Q13724	MOGS	Mannosyl-oligosaccharide glucosidase OS=Homo sapiens OX=9606 GN=MOGS PE=1 SV=5	NA	1.34493	1.93881	-0.442481	-0.593882	0.151401	1.78741	0.97044	1.7098	0.149038	0.32175	0.0307315	1.53224
Q13823	GNL2	Nucleolar GTP-binding protein 2 OS=Homo sapiens OX=9606 GN=GNL2 PE=1 SV=1	NA	1.0066	0.771189	-0.37874	0.235409	-0.61415	1.38534	1.46955	0.787838	0.150231	0.0934337	0.126505	1.75169
Q13838	DDX39B	Spliceosome RNA helicase DDX39B OS=Homo sapiens OX=9606 GN=DDX39B PE=1 SV=1	NA	1.74999	1.88714	-0.0445291	-0.137158	0.0926289	1.79452	2.1255	2.55939	0.00517611	0.0455477	0.0141056	1.69611
Q13895	BYSL	Bystin OS=Homo sapiens OX=9606 GN=BYSL PE=1 SV=3	NA	0.827009	0.975591	-0.469796	-0.148581	-0.321215	1.29681	0.405525	0.713194	0.0944472	0.0374252	0.0612529	0.869587
Q14004	CDK13	Cyclin-dependent kinase 13 OS=Homo sapiens OX=9606 GN=CDK13 PE=1 SV=2	NA	1.6733	1.9576	-0.564591	-0.2843	-0.280291	2.23789	1.24635	1.55865	0.259769	0.172889	0.0675567	1.76126
Q14008	CKAP5	Cytoskeleton-associated protein 5 OS=Homo sapiens OX=9606 GN=CKAP5 PE=1 SV=3	NA	0.595008	1.2842	-0.514364	-0.689192	0.174827	1.10937	0.428256	1.50729	0.151549	0.417408	0.0338963	0.999431
Q14103	HNRNPD	Heterogeneous nuclear ribonucleoprotein D0 OS=Homo sapiens OX=9606 GN=HNRNPD PE=1 SV=1	NA	-0.013708	-1.17901	-1.66152	1.1653	-2.82683	1.64782	0.00440462	1.52782	0.298483	0.572257	0.559626	0.83706
Q14126	DSG2	Desmoglein-2 OS=Homo sapiens OX=9606 GN=DSG2 PE=1 SV=2	NA	-0.457524	0.199999	-1.02099	-0.657523	-0.363471	0.56347	0.143232	0.120654	0.163679	0.137183	0.0675567	0.362368
Q14137	BOP1	Ribosome biogenesis protein BOP1 OS=Homo sapiens OX=9606 GN=BOP1 PE=1 SV=2	NA	1.94475	2.28779	0.0209082	-0.343038	0.363946	1.92384	2.04164	2.94754	0.00407757	0.160604	0.0788192	2.16434
Q14152	EIF3A	Eukaryotic translation initiation factor 3 subunit A OS=Homo sapiens OX=9606 GN=EIF3A PE=1 SV=1	NA	NA	NA	0.98249	0.313895	0.668595	1.11253	NA	NA	0.204118	0.191854	0.0677251	0.634307
Q14152	EIF3A	Eukaryotic translation initiation factor 3 subunit A OS=Homo sapiens OX=9606 GN=EIF3A PE=1 SV=1	translation initiation factor (eIF)	2.09502	1.78113	NA	NA	NA	NA	2.55024	3.09956	NA	NA	NA	NA
Q14157	UBAP2L	Ubiquitin-associated protein 2-like OS=Homo sapiens OX=9606 GN=UBAP2L PE=1 SV=2	NA	-2.43492	-2.65309	-0.759992	0.218171	-0.978163	-1.67492	2.29648	3.00068	0.314893	0.091693	0.414717	1.78506
Q14166	TTLL12	Tubulin--tyrosine ligase-like protein 12 OS=Homo sapiens OX=9606 GN=TTLL12 PE=1 SV=2	NA	1.69231	0.736501	-0.281971	0.955814	-1.23779	1.97429	1.75694	1.04589	0.0574086	0.487839	0.510007	2.37438
Q14204	DYNC1H1	Cytoplasmic dynein 1 heavy chain 1 OS=Homo sapiens OX=9606 GN=DYNC1H1 PE=1 SV=5	NA	0.4695	-0.0709705	0.144806	0.540471	-0.395665	0.324695	0.222667	0.0263365	0.0348945	0.308937	0.0677251	0.138722
Q14241	ELOA	Elongin-A OS=Homo sapiens OX=9606 GN=ELOA PE=1 SV=2	NA	1.19541	1.35221	-0.403454	-0.1568	-0.246654	1.59886	0.665868	0.904535	0.131738	0.0564639	0.0675567	1.11357
Q14331	FRG1	Protein FRG1 OS=Homo sapiens OX=9606 GN=FRG1 PE=1 SV=1	NA	-0.32612	0.278804	0.51039	-0.604923	1.11531	-0.83651	0.227595	0.324701	0.131738	0.295034	0.357406	0.78513
Q14498	RBM39	RNA-binding protein 39 OS=Homo sapiens OX=9606 GN=RBM39 PE=1 SV=2	NA	1.22423	0.122236	0.885187	1.10199	-0.216806	0.339042	1.51515	0.0726398	0.395395	0.581299	0.0334519	0.274747
Q14527	HLTF	Helicase-like transcription factor OS=Homo sapiens OX=9606 GN=HLTF PE=1 SV=2	NA	0.933854	1.75108	-0.0159809	-0.817228	0.801248	0.949835	0.993916	1.9744	0.00407757	0.465465	0.161848	0.762174
Q14558	PRPSAP1	Phosphoribosyl pyrophosphate synthase-associated protein 1 OS=Homo sapiens OX=9606 GN=PRPSAP1 PE=1 SV=2	NA	1.65604	0.649114	0.27682	1.00693	-0.730106	1.37922	2.1211	0.975274	0.0559428	0.79559	0.161848	1.26334
Q14562	DHX8	ATP-dependent RNA helicase DHX8 OS=Homo sapiens OX=9606 GN=DHX8 PE=1 SV=1	NA	1.6507	1.71582	0.376136	-0.0651139	0.44125	1.27457	2.15711	1.85849	0.0496914	0.0167422	0.037936	0.742589
Q14566	MCM6	DNA replication licensing factor MCM6 OS=Homo sapiens OX=9606 GN=MCM6 PE=1 SV=1	NA	2.96238	1.26211	-0.210331	1.70027	-1.9106	3.17271	2.12716	0.531754	0.0382719	0.442859	0.303252	2.61785
Q14669	TRIP12	E3 ubiquitin-protein ligase TRIP12 OS=Homo sapiens OX=9606 GN=TRIP12 PE=1 SV=1	NA	-0.0243762	0.538354	-0.693604	-0.56273	-0.130874	0.669228	0.0128248	0.659221	0.280774	0.374239	0.0265969	0.640128
Q14671	PUM1	Pumilio homolog 1 OS=Homo sapiens OX=9606 GN=PUM1 PE=1 SV=3	NA	-0.436378	0.000673643	-0.262396	-0.437052	0.174656	-0.173982	0.252049	0.000463681	0.0514483	0.142034	0.0265969	0.0984331
Q14676	MDC1	Mediator of DNA damage checkpoint protein 1 OS=Homo sapiens OX=9606 GN=MDC1 PE=1 SV=3	NA	-0.471645	-0.108425	-0.3331	-0.36322	0.0301197	-0.138545	0.20361	0.0378673	0.0716759	0.145077	0.00503617	0.0472476
Q14677	CLINT1	Clathrin interactor 1 OS=Homo sapiens OX=9606 GN=CLINT1 PE=1 SV=1	NA	-2.08506	-2.71236	-0.392769	0.627301	-1.02007	-1.69229	1.29923	3.01692	0.0574086	0.166784	0.357406	1.62664
Q14683	SMC1A	Structural maintenance of chromosomes protein 1A OS=Homo sapiens OX=9606 GN=SMC1A PE=1 SV=2	NA	2.17814	1.73377	0.420032	0.44437	-0.0243385	1.75811	2.46964	2.56021	0.128266	0.344668	0.00503617	1.73188
Q14684	RRP1B	Ribosomal RNA processing protein 1 homolog B OS=Homo sapiens OX=9606 GN=RRP1B PE=1 SV=3	NA	2.37403	2.96061	-0.549816	-0.586579	0.036763	2.92384	2.60939	3.86095	0.215654	0.3804	0.00903387	3.29171
Q14690	PDCD11	Protein RRP5 homolog OS=Homo sapiens OX=9606 GN=PDCD11 PE=1 SV=3	NA	1.30063	3.42741	-0.495058	-2.12678	1.63172	1.79569	1.41223	4.04234	0.0382719	1.39956	0.126505	0.668837
Q14692	BMS1	Ribosome biogenesis protein BMS1 homolog OS=Homo sapiens OX=9606 GN=BMS1 PE=1 SV=1	NA	0.40213	1.00057	-0.451592	-0.598445	0.146853	0.853722	0.428256	1.00149	0.191621	0.292121	0.0243878	0.931437
Q14694	USP10	Ubiquitin carboxyl-terminal hydrolase 10 OS=Homo sapiens OX=9606 GN=USP10 PE=1 SV=2	NA	-0.272038	-1.18621	0.628828	0.914176	-0.285348	-0.900866	0.107524	1.36063	0.125591	0.269174	0.0519615	0.920904
Q14697	GANAB	Neutral alpha-glucosidase AB OS=Homo sapiens OX=9606 GN=GANAB PE=1 SV=3	NA	0.999203	0.705834	0.172889	0.29337	-0.12048	0.826314	1.22013	0.817372	0.0504831	0.191005	0.0261385	0.827705
Q14739	LBR	Delta(14)-sterol reductase LBR OS=Homo sapiens OX=9606 GN=LBR PE=1 SV=2	NA	1.17594	2.333	-1.20715	-1.15706	-0.0500883	2.38309	1.46685	2.82277	0.47964	0.644645	0.00903387	2.70085
Q14807	KIF22	Kinesin-like protein KIF22 OS=Homo sapiens OX=9606 GN=KIF22 PE=1 SV=5	NA	-0.531909	-0.346828	-0.337717	-0.18508	-0.152637	-0.194191	0.338542	0.220068	0.0950999	0.0629292	0.0265969	0.10208
Q14839	CHD4	Chromodomain-helicase-DNA-binding protein 4 OS=Homo sapiens OX=9606 GN=CHD4 PE=1 SV=2	NA	0.356759	0.678017	0.637336	-0.321258	0.958594	-0.280577	0.352205	0.909644	0.192438	0.180435	0.251933	0.165612
Q14966	ZNF638	Zinc finger protein 638 OS=Homo sapiens OX=9606 GN=ZNF638 PE=1 SV=2	NA	0.189231	0.739455	-0.429909	-0.550224	0.120316	0.61914	0.127004	0.975274	0.146714	0.325694	0.0261385	0.604771
Q14974	KPNB1	Importin subunit beta-1 OS=Homo sapiens OX=9606 GN=KPNB1 PE=1 SV=2	NA	1.07697	1.19142	-0.0888912	-0.114448	0.0255565	1.16586	1.35445	1.5823	0.0137071	0.0424993	0.00503617	1.04713
Q14978	NOLC1	Nucleolar and coiled-body phosphoprotein 1 OS=Homo sapiens OX=9606 GN=NOLC1 PE=1 SV=2	NA	3.83453	3.835	-0.16574	-0.000476267	-0.165264	4.00027	2.92805	3.62887	0.0382719	0.000344455	0.0265969	3.29171
Q14980	NUMA1	Nuclear mitotic apparatus protein 1 OS=Homo sapiens OX=9606 GN=NUMA1 PE=1 SV=2	NA	1.21119	1.31895	-0.81782	-0.107755	-0.710065	2.02901	1.70515	2.31947	0.321706	0.0553001	0.251933	2.36426
Q15006	EMC2	ER membrane protein complex subunit 2 OS=Homo sapiens OX=9606 GN=EMC2 PE=1 SV=1	NA	0.384189	1.50817	-0.866703	-1.12398	0.257276	1.25089	0.28639	1.44951	0.37237	0.558844	0.037936	1.35086
Q15018	ABRAXAS2	BRISC complex subunit Abraxas 2 OS=Homo sapiens OX=9606 GN=ABRAXAS2 PE=1 SV=2	NA	-0.421235	0.379523	-0.407273	-0.800758	0.393485	-0.0139618	0.222484	0.209326	0.0859351	0.227168	0.0519615	0.0079522
Q15020	SART3	Squamous cell carcinoma antigen recognized by T-cells 3 OS=Homo sapiens OX=9606 GN=SART3 PE=1 SV=1	NA	-0.552973	-0.930556	-0.753559	0.377583	-1.13114	0.200586	0.389676	1.17236	0.223391	0.137649	0.357406	0.119812
Q15022	SUZ12	Polycomb protein SUZ12 OS=Homo sapiens OX=9606 GN=SUZ12 PE=1 SV=3	NA	1.12984	1.94659	-0.465144	-0.816757	0.351613	1.59498	0.705459	1.91312	0.125591	0.36554	0.102463	1.43883
Q15029	EFTUD2	116 kDa U5 small nuclear ribonucleoprotein component OS=Homo sapiens OX=9606 GN=EFTUD2 PE=1 SV=1	NA	1.15544	1.48823	0.14469	-0.332792	0.477482	1.01075	0.940731	1.21434	0.0382719	0.132662	0.0856873	0.798884
Q15046	KARS1	Lysine--tRNA ligase OS=Homo sapiens OX=9606 GN=KARS1 PE=1 SV=3	NA	1.09958	1.44841	-0.374363	-0.348833	-0.02553	1.47394	1.5046	2.3861	0.118659	0.261742	0.00503617	1.554
Q15050	RRS1	Ribosome biogenesis regulatory protein homolog OS=Homo sapiens OX=9606 GN=RRS1 PE=1 SV=2	NA	-0.376404	0.027798	-1.08914	-0.404202	-0.684943	0.712741	0.170758	0.0101763	0.37237	0.199094	0.168302	0.395568
Q15054	POLD3	DNA polymerase delta subunit 3 OS=Homo sapiens OX=9606 GN=POLD3 PE=1 SV=2	NA	0.640651	1.31	-0.435652	-0.669345	0.233693	1.0763	0.297137	0.928129	0.0950999	0.253587	0.037936	0.717858
Q15061	WDR43	WD repeat-containing protein 43 OS=Homo sapiens OX=9606 GN=WDR43 PE=1 SV=3	NA	-0.203657	-0.134214	0.0117646	-0.0694432	0.0812078	-0.215421	0.146274	0.0964418	0.00407757	0.0301678	0.0216655	0.142431
Q15084	PDIA6	Protein disulfide-isomerase A6 OS=Homo sapiens OX=9606 GN=PDIA6 PE=1 SV=1	NA	0.652022	0.946737	-0.0980664	-0.294715	0.196649	0.750088	0.756954	1.25109	0.0181919	0.137818	0.0282068	0.679152
Q15149	PLEC	Plectin OS=Homo sapiens OX=9606 GN=PLEC PE=1 SV=3	NA	-0.114346	0.39419	-0.436971	-0.508536	0.0715651	0.322625	0.0791982	0.464394	0.168505	0.342013	0.0227262	0.270235
Q15185	PTGES3	Prostaglandin E synthase 3 OS=Homo sapiens OX=9606 GN=PTGES3 PE=1 SV=1	NA	3.55461	3.02333	0.0530679	0.531284	-0.478216	3.50154	2.372	2.1401	0.00933384	0.257485	0.0713647	2.50646
Q15233	NONO	Non-POU domain-containing octamer-binding protein OS=Homo sapiens OX=9606 GN=NONO PE=1 SV=4	NA	1.56057	0.766512	-0.259276	0.794061	-1.05334	1.81985	1.47051	0.552619	0.0382719	0.278375	0.168302	1.54514
Q15269	PWP2	Periodic tryptophan protein 2 homolog OS=Homo sapiens OX=9606 GN=PWP2 PE=2 SV=2	NA	1.03804	1.15211	-0.397107	-0.114072	-0.283035	1.43514	1.10788	1.55586	0.111075	0.050315	0.0496399	1.34412
Q15287	RNPS1	RNA-binding protein with serine-rich domain 1 OS=Homo sapiens OX=9606 GN=RNPS1 PE=1 SV=1	NA	2.89707	2.87315	-1.25117	0.0239229	-1.2751	4.14824	2.53043	2.93453	0.455216	0.00651034	0.357406	4.01529
Q15345	LRRC41	Leucine-rich repeat-containing protein 41 OS=Homo sapiens OX=9606 GN=LRRC41 PE=1 SV=3	NA	0.628221	1.0196	-0.28138	-0.391382	0.110001	0.909601	0.413617	0.825628	0.0879912	0.220416	0.0228278	0.677553
Q15361	TTF1	Transcription termination factor 1 OS=Homo sapiens OX=9606 GN=TTF1 PE=1 SV=3	NA	1.92096	1.7397	0.0791347	0.181257	-0.102122	1.84182	1.68739	1.79176	0.0150688	0.08917	0.0228278	1.62214
Q15365	PCBP1	Poly(rC)-binding protein 1 OS=Homo sapiens OX=9606 GN=PCBP1 PE=1 SV=2	NA	1.70061	0.857591	-0.157571	0.84302	-1.00059	1.85818	1.82474	1.19212	0.020669	0.428895	0.16311	1.43883
Q15366	PCBP2	Poly(rC)-binding protein 2 OS=Homo sapiens OX=9606 GN=PCBP2 PE=1 SV=1	NA	1.37252	1.85772	-0.811384	-0.485202	-0.326181	2.18391	1.81485	1.49035	0.27238	0.142034	0.0334519	2.10998
Q15369	ELOC	Elongin-C OS=Homo sapiens OX=9606 GN=ELOC PE=1 SV=1	NA	0.687521	0.408576	0.60897	0.278945	0.330026	0.0785502	0.554019	0.289874	0.246818	0.132662	0.0675567	0.0388568
Q15382	RHEB	GTP-binding protein Rheb OS=Homo sapiens OX=9606 GN=RHEB PE=1 SV=1	NA	-0.476665	-0.43882	-0.375417	-0.0378449	-0.337572	-0.101249	0.348285	0.336199	0.123527	0.0154241	0.0675567	0.0527401
Q15388	TOMM20	Mitochondrial import receptor subunit TOM20 homolog OS=Homo sapiens OX=9606 GN=TOMM20 PE=1 SV=1	NA	2.74572	3.56243	0.790156	-0.816716	1.60687	1.95556	1.4124	2.71878	0.0950999	0.142034	0.262545	1.36943
Q15392	DHCR24	Delta(24)-sterol reductase OS=Homo sapiens OX=9606 GN=DHCR24 PE=1 SV=2	NA	-0.0795842	0.269276	-0.494714	-0.34886	-0.145854	0.41513	0.0469103	0.206251	0.131738	0.174201	0.0228278	0.24135
Q15397	PUM3	Pumilio homolog 3 OS=Homo sapiens OX=9606 GN=PUM3 PE=1 SV=3	NA	0.50869	0.888974	-0.481325	-0.380284	-0.101041	0.990015	0.222701	0.572304	0.0781275	0.0631207	0.0127368	0.899403
Q15459	SF3A1	Splicing factor 3A subunit 1 OS=Homo sapiens OX=9606 GN=SF3A1 PE=1 SV=1	NA	0.00237062	-0.147111	0.14467	0.149481	-0.00481128	-0.1423	0.00168776	0.122948	0.0392924	0.0686435	0.00447354	0.0997506
Q15527	SURF2	Surfeit locus protein 2 OS=Homo sapiens OX=9606 GN=SURF2 PE=1 SV=3	NA	-0.0255922	0.431987	-0.729226	-0.457579	-0.271646	0.703633	0.00899879	0.225079	0.259137	0.260739	0.0381978	0.383311
Q15554	TERF2	Telomeric repeat-binding factor 2 OS=Homo sapiens OX=9606 GN=TERF2 PE=1 SV=3	NA	0.751008	1.1496	-0.16446	-0.398594	0.234134	0.915468	0.430315	1.46123	0.0303441	0.11815	0.0612529	0.924743
Q15555	MAPRE2	Microtubule-associated protein RP/EB family member 2 OS=Homo sapiens OX=9606 GN=MAPRE2 PE=1 SV=1	NA	0.631995	0.67473	0.429952	-0.0427344	0.472686	0.202043	0.407206	0.46277	0.118659	0.0166916	0.0721191	0.0854552
Q15637	SF1	Splicing factor 1 OS=Homo sapiens OX=9606 GN=SF1 PE=1 SV=4	NA	-1.06349	-2.80032	-0.0628085	1.73683	-1.79964	-1.00068	1.27719	3.86095	0.0106549	1.35509	1.02712	1.11753
Q15648	MED1	Mediator of RNA polymerase II transcription subunit 1 OS=Homo sapiens OX=9606 GN=MED1 PE=1 SV=4	NA	-0.705247	-1.37744	-0.756646	0.67219	-1.42884	0.0513984	0.414869	1.15252	0.246818	0.35359	0.629787	0.0225835
Q15691	MAPRE1	Microtubule-associated protein RP/EB family member 1 OS=Homo sapiens OX=9606 GN=MAPRE1 PE=1 SV=3	NA	-1.91361	-1.27919	-2.15166	-0.634417	-1.51725	0.238054	0.596074	0.348611	0.278762	0.0509712	0.0997566	0.138916
Q15717	ELAVL1	ELAV-like protein 1 OS=Homo sapiens OX=9606 GN=ELAVL1 PE=1 SV=2	NA	2.04583	0.128586	0.851679	1.91724	-1.06556	1.19415	1.65722	0.0973408	0.130495	0.832296	0.124596	0.646128
Q15758	SLC1A5	Neutral amino acid transporter B(0) OS=Homo sapiens OX=9606 GN=SLC1A5 PE=1 SV=2	NA	1.24942	0.282692	-0.342234	0.966725	-1.30896	1.59165	0.797045	0.211365	0.0382719	0.318035	0.251933	1.11428
Q16181	SEPTIN7	Septin-7 OS=Homo sapiens OX=9606 GN=SEPTIN7 PE=1 SV=2	NA	0.234616	0.0795304	0.0742253	0.155085	-0.0808598	0.16039	0.154896	0.0518145	0.0178601	0.0904489	0.0228278	0.0957703
Q16513	PKN2	Serine/threonine-protein kinase N2 OS=Homo sapiens OX=9606 GN=PKN2 PE=1 SV=1	NA	0.229359	0.145791	-0.706429	0.0835682	-0.789997	0.935788	0.113047	0.0482673	0.203703	0.0154241	0.0782462	0.739018
Q16576	RBBP7	Histone-binding protein RBBP7 OS=Homo sapiens OX=9606 GN=RBBP7 PE=1 SV=1	NA	0.566614	0.522133	-0.152868	0.044481	-0.197349	0.719482	0.465863	0.475568	0.0382719	0.018976	0.0381978	0.567678
Q16637	SMN1	Survival motor neuron protein OS=Homo sapiens OX=9606 GN=SMN1 PE=1 SV=1	NA	0.860632	0.709425	-0.378931	0.151206	-0.530137	1.23956	0.375662	0.26713	0.0950999	0.0310945	0.0675567	0.704412
Q16658	FSCN1	Fascin OS=Homo sapiens OX=9606 GN=FSCN1 PE=1 SV=3	NA	1.05022	1.2141	-0.436474	-0.163882	-0.272592	1.48669	1.10515	2.29851	0.134042	0.0604103	0.0677251	1.96954
Q16763	UBE2S	Ubiquitin-conjugating enzyme E2 S OS=Homo sapiens OX=9606 GN=UBE2S PE=1 SV=2	NA	0.653698	2.21286	-1.21781	-1.55916	0.341348	1.87151	0.287133	2.0796	0.226192	0.472288	0.0366268	1.31934
Q16795	NDUFA9	NADH dehydrogenase [ubiquinone] 1 alpha subcomplex subunit 9, mitochondrial OS=Homo sapiens OX=9606 GN=NDUFA9 PE=1 SV=2	NA	0.893795	1.85872	-0.611924	-0.96493	0.353007	1.50572	0.588463	1.6527	0.278762	0.77733	0.10422	1.2204
Q16891	IMMT	MICOS complex subunit MIC60 OS=Homo sapiens OX=9606 GN=IMMT PE=1 SV=1	NA	-0.0368346	0.449677	0.172656	-0.486511	0.659167	-0.209491	0.014905	0.238822	0.0382719	0.153934	0.112219	0.110764
Q1ED39	KNOP1	Lysine-rich nucleolar protein 1 OS=Homo sapiens OX=9606 GN=KNOP1 PE=1 SV=1	NA	-0.657182	-0.517941	-0.00678617	-0.139241	0.132455	-0.650396	0.223203	0.290065	0.00202044	0.0176197	0.0228278	0.402677
Q1KMD3	HNRNPUL2	Heterogeneous nuclear ribonucleoprotein U-like protein 2 OS=Homo sapiens OX=9606 GN=HNRNPUL2 PE=1 SV=1	NA	2.53917	1.92656	0.695997	0.612611	0.0833863	1.84318	2.39233	1.87485	0.16362	0.36554	0.0123892	1.2702
Q2NL82	TSR1	Pre-rRNA-processing protein TSR1 homolog OS=Homo sapiens OX=9606 GN=TSR1 PE=1 SV=1	NA	1.58528	2.47963	-0.682476	-0.89435	0.211874	2.26776	2.05035	3.71217	0.248042	0.722062	0.0396194	2.5917
Q2VIQ3	KIF4B	Chromosome-associated kinesin KIF4B OS=Homo sapiens OX=9606 GN=KIF4B PE=2 SV=2	NA	1.31778	-0.536454	0.24899	1.85423	-1.60524	1.06879	1.00816	0.324701	0.0382719	0.710709	0.356416	0.801668
Q32NC0	C18orf21	UPF0711 protein C18orf21 OS=Homo sapiens OX=9606 GN=C18orf21 PE=1 SV=1	NA	0.257488	0.0225916	-1.14137	0.234897	-1.37626	1.39885	0.0820172	0.00541174	0.41863	0.0903651	0.629787	0.752863
Q3B726	TWISTNB	DNA-directed RNA polymerase I subunit RPA43 OS=Homo sapiens OX=9606 GN=TWISTNB PE=1 SV=1	NA	1.74616	2.07848	-0.330623	-0.332322	0.00169887	2.07678	1.0054	1.37342	0.073818	0.132662	0.00126329	1.29031
Q3KQU3	MAP7D1	MAP7 domain-containing protein 1 OS=Homo sapiens OX=9606 GN=MAP7D1 PE=1 SV=1	NA	1.25784	2.12825	-0.767812	-0.87041	0.102598	2.02565	1.08106	2.30467	0.278762	0.513566	0.0228278	1.9532
Q4G0J3	LARP7	La-related protein 7 OS=Homo sapiens OX=9606 GN=LARP7 PE=1 SV=1	NA	1.18018	0.839623	0.148765	0.34056	-0.191795	1.03142	0.821449	0.870172	0.0261725	0.101131	0.0369597	1.01904
Q4KMP7	TBC1D10B	TBC1 domain family member 10B OS=Homo sapiens OX=9606 GN=TBC1D10B PE=1 SV=3	NA	1.34576	-1.60632	3.0352	2.95208	0.08312	-1.68944	1.18276	1.50194	2.67924	2.54015	0.0213809	1.50163
Q53GQ0	HSD17B12	Very-long-chain 3-oxoacyl-CoA reductase OS=Homo sapiens OX=9606 GN=HSD17B12 PE=1 SV=2	NA	-1.57888	0.569962	-0.804675	-2.14884	1.34416	-0.774203	1.64189	0.626729	0.229781	1.39956	0.357406	0.529931
Q53GS9	USP39	U4/U6.U5 tri-snRNP-associated protein 2 OS=Homo sapiens OX=9606 GN=USP39 PE=1 SV=2	NA	-0.74968	0.290672	-1.05323	-1.04035	-0.0128792	0.303551	0.649381	0.225961	0.33235	0.64865	0.00477198	0.172005
Q5BKZ1	ZNF326	DBIRD complex subunit ZNF326 OS=Homo sapiens OX=9606 GN=ZNF326 PE=1 SV=2	NA	-0.77658	-0.451832	-0.778844	-0.324748	-0.454096	0.00226409	0.552075	0.52832	0.197427	0.112032	0.0829232	0.00118913
Q5C9Z4	NOM1	Nucleolar MIF4G domain-containing protein 1 OS=Homo sapiens OX=9606 GN=NOM1 PE=1 SV=1	NA	1.4435	2.10169	-0.913841	-0.65819	-0.255651	2.35734	1.86982	2.56144	0.41863	0.36554	0.0411206	2.77335
Q5D862	NA	SWISS-PROT:Q5D862 Tax_Id=9606 Gene_Symbol=FLG2 Filaggrin-2	NA	0.0923357	-1.12796	0.264069	1.2203	-0.95623	-0.171734	0.0300289	0.696489	0.0348945	0.340719	0.103273	0.0619777
Q5JRX3	PITRM1	Presequence protease, mitochondrial OS=Homo sapiens OX=9606 GN=PITRM1 PE=1 SV=3	NA	-0.498904	0.446831	-1.10846	-0.945736	-0.162728	0.609559	0.122326	0.31234	0.139243	0.148493	0.0265969	0.45256
Q5JTH9	RRP12	RRP12-like protein OS=Homo sapiens OX=9606 GN=RRP12 PE=1 SV=2	NA	0.526543	2.0072	-0.789621	-1.48066	0.691039	1.31616	0.572335	3.04841	0.350799	1.09855	0.252522	1.63858
Q5JXB2	UBE2NL	Putative ubiquitin-conjugating enzyme E2 N-like OS=Homo sapiens OX=9606 GN=UBE2NL PE=1 SV=1	NA	0.778399	0.311442	-0.785751	0.466957	-1.25271	1.56415	0.437433	0.223138	0.131738	0.11577	0.229325	1.11578
Q5QJE6	DNTTIP2	Deoxynucleotidyltransferase terminal-interacting protein 2 OS=Homo sapiens OX=9606 GN=DNTTIP2 PE=1 SV=2	NA	-0.764328	-0.725895	-0.786588	-0.0384337	-0.748154	0.0222591	0.87644	1.01624	0.298422	0.0167422	0.238681	0.0114321
Q5SSJ5	HP1BP3	Heterochromatin protein 1-binding protein 3 OS=Homo sapiens OX=9606 GN=HP1BP3 PE=1 SV=1	NA	2.23164	4.11741	-2.00297	-1.88577	-0.117198	4.23461	2.46964	4.08954	1.4732	1.39956	0.0265969	4.01529
Q5SW79	CEP170	Centrosomal protein of 170 kDa OS=Homo sapiens OX=9606 GN=CEP170 PE=1 SV=1	NA	-1.78021	-3.23818	-1.03115	1.45797	-2.48913	-0.749055	1.24635	3.04841	0.197427	0.685518	0.678426	0.343156
Q5SY16	NOL9	Polynucleotide 5'-hydroxyl-kinase NOL9 OS=Homo sapiens OX=9606 GN=NOL9 PE=1 SV=1	NA	1.59423	1.86673	-0.642366	-0.2725	-0.369865	2.2366	1.87683	1.29432	0.204435	0.0573363	0.0366268	2.21121
Q5T280	SPOUT1	Putative methyltransferase C9orf114 OS=Homo sapiens OX=9606 GN=SPOUT1 PE=1 SV=3	NA	0.105191	-0.633022	0.570828	0.738214	-0.167386	-0.465637	0.0379717	0.376228	0.149038	0.360344	0.0265969	0.225364
Q5T3I0	GPATCH4	G patch domain-containing protein 4 OS=Homo sapiens OX=9606 GN=GPATCH4 PE=1 SV=2	NA	-1.05295	0.0477184	-2.05905	-1.10067	-0.958382	1.0061	1.45838	0.0354721	1.00229	0.845109	0.283904	0.961262
Q5T653	MRPL2	39S ribosomal protein L2, mitochondrial OS=Homo sapiens OX=9606 GN=MRPL2 PE=1 SV=2	NA	2.25126	2.24379	-0.349413	0.00746963	-0.356882	2.60067	1.30148	1.33928	0.137873	0.00481845	0.0879082	1.63858
Q5T749	KPRP	Keratinocyte proline-rich protein OS=Homo sapiens OX=9606 GN=KPRP PE=1 SV=1	NA	-0.25363	0.0961933	-0.334869	-0.349823	0.0149541	0.0812392	0.120515	0.0518145	0.0750521	0.127826	0.00477198	0.037962
Q5T8P6	RBM26	RNA-binding protein 26 OS=Homo sapiens OX=9606 GN=RBM26 PE=1 SV=3	NA	-2.0963	-2.96086	-0.698096	0.864567	-1.56266	-1.3982	2.46964	4.04234	0.285943	0.685518	1.01731	1.69611
Q5T9A4	ATAD3B	ATPase family AAA domain-containing protein 3B OS=Homo sapiens OX=9606 GN=ATAD3B PE=1 SV=1	NA	1.857	2.0141	0.800636	-0.157101	0.957737	1.05636	2.2647	2.89823	0.246818	0.0784295	0.251933	0.827953
Q5TBB1	RNASEH2B	Ribonuclease H2 subunit B OS=Homo sapiens OX=9606 GN=RNASEH2B PE=1 SV=1	NA	0.614711	0.966875	-0.433324	-0.352164	-0.0811593	1.04803	0.60119	0.647442	0.107793	0.0909751	0.0105891	0.891019
Q5UIP0	RIF1	Telomere-associated protein RIF1 OS=Homo sapiens OX=9606 GN=RIF1 PE=1 SV=2	NA	0.119324	-0.314516	-0.122441	0.43384	-0.556281	0.241765	0.0814223	0.307302	0.0234206	0.260472	0.095039	0.133602
Q5VWG9	TAF3	Transcription initiation factor TFIID subunit 3 OS=Homo sapiens OX=9606 GN=TAF3 PE=1 SV=1	NA	0.104469	-0.110734	0.681672	0.215204	0.466468	-0.577203	0.0578102	0.0835853	0.168505	0.0841258	0.0675567	0.374331
Q5VYK3	ECPAS	Proteasome adapter and scaffold protein ECM29 OS=Homo sapiens OX=9606 GN=ECPAS PE=1 SV=2	NA	-0.275461	-0.0562594	0.134524	-0.219201	0.353725	-0.409985	0.247509	0.0382309	0.0348889	0.102032	0.0647533	0.29423
Q5VYS8	TUT7	Terminal uridylyltransferase 7 OS=Homo sapiens OX=9606 GN=TUT7 PE=1 SV=1	NA	0.0517096	-0.180953	0.455072	0.232663	0.222409	-0.403362	0.0190662	0.0799899	0.148334	0.0691699	0.0316263	0.219262
Q66PJ3	ARL6IP4	ADP-ribosylation factor-like protein 6-interacting protein 4 OS=Homo sapiens OX=9606 GN=ARL6IP4 PE=1 SV=2	NA	0.450515	0.260618	0.147134	0.189897	-0.042763	0.303381	0.358375	0.187866	0.0382719	0.0879919	0.0106635	0.203506
Q68CQ4	DIEXF	Digestive organ expansion factor homolog OS=Homo sapiens OX=9606 GN=DIEXF PE=1 SV=2	NA	1.47694	1.63762	-0.445891	-0.160676	-0.285215	1.92283	1.74834	2.41123	0.153745	0.0624068	0.0675567	2.42147
Q68D10	SPTY2D1	Protein SPT2 homolog OS=Homo sapiens OX=9606 GN=SPTY2D1 PE=1 SV=3	NA	1.65799	1.44616	0.740536	0.211829	0.528707	0.917456	1.12072	0.854215	0.344948	0.0655353	0.0921889	0.53611
Q6DKI1	RPL7L1	60S ribosomal protein L7-like 1 OS=Homo sapiens OX=9606 GN=RPL7L1 PE=1 SV=2	NA	0.145827	0.518205	-0.779265	-0.372378	-0.406888	0.925093	0.0944049	0.310745	0.298483	0.102032	0.0515779	0.961262
Q6FI13	HIST2H2AA3	Histone H2A type 2-A OS=Homo sapiens OX=9606 GN=HIST2H2AA3 PE=1 SV=3	NA	-0.188579	-0.180129	0.232002	-0.00845004	0.240452	-0.420581	0.0813103	0.11614	0.0382719	0.00376658	0.0411206	0.274488
Q6IAN0	DHRS7B	Dehydrogenase/reductase SDR family member 7B OS=Homo sapiens OX=9606 GN=DHRS7B PE=1 SV=2	NA	0.599745	0.948628	-0.503331	-0.348883	-0.154448	1.10308	0.399954	1.25076	0.129817	0.128587	0.0282068	1.09057
Q6L8Q7	PDE12	2',5'-phosphodiesterase 12 OS=Homo sapiens OX=9606 GN=PDE12 PE=1 SV=2	NA	1.54151	NA	0.29946	-0.180114	0.479573	1.24205	1.243	NA	0.0784546	0.0573363	0.0922206	0.99649
Q6L8Q7	PDE12	2',5'-phosphodiesterase 12 OS=Homo sapiens OX=9606 GN=PDE12 PE=1 SV=2	defense response to virus	NA	1.72162	NA	NA	NA	NA	NA	1.49586	NA	NA	NA	NA
Q6NSI4	RADX	RPA-related protein RADX OS=Homo sapiens OX=9606 GN=RADX PE=1 SV=2	NA	-0.0820051	-0.141247	-0.314676	0.0592423	-0.373918	0.232671	0.0419012	0.0677041	0.116079	0.0165352	0.0675567	0.133599
Q6NW34	NEPRO	Nucleolus and neural progenitor protein OS=Homo sapiens OX=9606 GN=NEPRO PE=1 SV=3	NA	1.63434	2.2791	-0.391792	-0.644766	0.252975	2.02613	1.93947	3.27762	0.131738	0.425436	0.0602307	2.42109
Q6NYC1	JMJD6	Bifunctional arginine demethylase and lysyl-hydroxylase JMJD6 OS=Homo sapiens OX=9606 GN=JMJD6 PE=1 SV=1	NA	2.16103	2.10242	0.315366	0.0586087	0.256758	1.84566	2.36719	2.19486	0.0872027	0.0165352	0.0366268	1.86088
Q6P158	DHX57	Putative ATP-dependent RNA helicase DHX57 OS=Homo sapiens OX=9606 GN=DHX57 PE=1 SV=2	NA	1.97576	1.96335	0.464483	0.0124127	0.45207	1.51128	2.2647	2.10758	0.191621	0.00544609	0.0782462	1.62664
Q6P1J9	CDC73	Parafibromin OS=Homo sapiens OX=9606 GN=CDC73 PE=1 SV=1	NA	0.195695	0.389125	-0.257857	-0.19343	-0.0644263	0.453551	0.0791982	0.223138	0.0382719	0.0632769	0.00883145	0.175724
Q6P1M0	SLC27A4	Long-chain fatty acid transport protein 4 OS=Homo sapiens OX=9606 GN=SLC27A4 PE=1 SV=1	NA	0.899076	2.33224	-0.860229	-1.43316	0.572933	1.7593	0.512028	2.03671	0.229781	0.789629	0.0934944	1.20504
Q6P2Q9	PRPF8	Pre-mRNA-processing-splicing factor 8 OS=Homo sapiens OX=9606 GN=PRPF8 PE=1 SV=2	NA	1.55766	2.36241	-0.579611	-0.804747	0.225135	2.13727	2.08636	3.71217	0.246818	0.663464	0.0612529	2.77335
Q6P4A7	SFXN4	Sideroflexin-4 OS=Homo sapiens OX=9606 GN=SFXN4 PE=1 SV=1	NA	1.00895	0.607506	0.380884	0.40144	-0.0205559	0.628062	1.05642	0.495431	0.143799	0.199094	0.00503617	0.526098
Q6P5R6	RPL22L1	60S ribosomal protein L22-like 1 OS=Homo sapiens OX=9606 GN=RPL22L1 PE=1 SV=2	NA	2.80266	2.72726	-0.0621038	0.0753991	-0.137503	2.86476	2.92805	2.9529	0.0137071	0.0217455	0.0243878	3.13224
Q6PCB5	RSBN1L	Lysine-specific demethylase RSBN1L OS=Homo sapiens OX=9606 GN=RSBN1L PE=1 SV=2	NA	-0.0774836	0.392168	-0.919691	-0.469652	-0.450039	0.842208	0.0183606	0.126064	0.205536	0.0818831	0.0461368	0.447036
Q6PKG0	LARP1	La-related protein 1 OS=Homo sapiens OX=9606 GN=LARP1 PE=1 SV=2	NA	0.942181	1.15524	-1.16977	-0.213061	-0.95671	2.11195	1.08999	1.91571	0.47101	0.098405	0.356416	2.44233
Q6UB35	MTHFD1L	Monofunctional C1-tetrahydrofolate synthase, mitochondrial OS=Homo sapiens OX=9606 GN=MTHFD1L PE=1 SV=1	NA	0.37312	-0.481538	-0.696374	0.854658	-1.55103	1.06949	0.297417	0.237564	0.298483	0.28891	0.340112	1.03392
Q6YN16	HSDL2	Hydroxysteroid dehydrogenase-like protein 2 OS=Homo sapiens OX=9606 GN=HSDL2 PE=1 SV=1	NA	1.81535	0.41323	0.386283	1.40212	-1.01584	1.42907	1.92807	0.384276	0.0854236	0.977375	0.252522	1.14884
Q6ZNB6	NFXL1	NF-X1-type zinc finger protein NFXL1 OS=Homo sapiens OX=9606 GN=NFXL1 PE=1 SV=2	NA	0.98647	2.09078	0.0131746	-1.10431	1.11748	0.973295	0.706703	2.00689	0.00407757	0.839843	0.414717	0.679152
Q709F0	ACAD11	Acyl-CoA dehydrogenase family member 11 OS=Homo sapiens OX=9606 GN=ACAD11 PE=1 SV=3	NA	0.884287	1.1449	-0.539509	-0.260609	-0.278899	1.4238	0.490754	0.695216	0.204118	0.11662	0.0461368	0.916057
Q71DI3	HIST2H3A	Histone H3.2 OS=Homo sapiens OX=9606 GN=HIST2H3A PE=1 SV=3	NA	1.55103	2.94549	-0.109721	-1.39445	1.28473	1.66075	1.35204	2.82277	0.0107782	0.690201	0.238681	1.0841
Q71UI9	H2AFV	Histone H2A.V OS=Homo sapiens OX=9606 GN=H2AFV PE=1 SV=3	NA	3.12694	2.12658	1.18118	1.00035	0.180825	1.94576	1.67781	1.82117	0.168505	0.278375	0.0228278	1.03311
Q7KZF4	SND1	Staphylococcal nuclease domain-containing protein 1 OS=Homo sapiens OX=9606 GN=SND1 PE=1 SV=1	NA	1.2284	0.29832	0.519922	0.930082	-0.41016	0.70848	1.67184	0.196996	0.211857	0.445052	0.0675567	0.742589
Q7KZI7	MARK2	Serine/threonine-protein kinase MARK2 OS=Homo sapiens OX=9606 GN=MARK2 PE=1 SV=2	NA	1.43354	1.58572	-0.291013	-0.152175	-0.138838	1.72456	0.934889	1.37729	0.0723642	0.0486006	0.0366268	1.44124
Q7L014	DDX46	Probable ATP-dependent RNA helicase DDX46 OS=Homo sapiens OX=9606 GN=DDX46 PE=1 SV=2	NA	-1.14223	-1.68286	-0.39421	0.540627	-0.934838	-0.748022	1.15856	2.48367	0.100444	0.25565	0.337003	0.74304
Q7L0Y3	TRMT10C	tRNA methyltransferase 10 homolog C OS=Homo sapiens OX=9606 GN=TRMT10C PE=1 SV=2	NA	1.32607	1.10844	-0.00721997	0.217636	-0.224856	1.33329	0.992178	0.835521	0.00363635	0.126541	0.0519615	0.99965
Q7L1Q6	BZW1	Basic leucine zipper and W2 domain-containing protein 1 OS=Homo sapiens OX=9606 GN=BZW1 PE=1 SV=1	NA	0.110453	0.360618	-0.302028	-0.250165	-0.0518632	0.412481	0.0478515	0.352934	0.0433275	0.08001	0.00883145	0.220505
Q7L2E3	DHX30	ATP-dependent RNA helicase DHX30 OS=Homo sapiens OX=9606 GN=DHX30 PE=1 SV=1	NA	1.01272	2.47167	-1.25562	-1.45896	0.203339	2.26833	0.876079	3.08897	0.43148	0.845109	0.0366268	2.40148
Q7L2J0	MEPCE	7SK snRNA methylphosphate capping enzyme OS=Homo sapiens OX=9606 GN=MEPCE PE=1 SV=1	NA	2.66605	2.81122	0.150124	-0.145171	0.295296	2.51592	2.92805	3.86095	0.0382719	0.0807468	0.0612529	2.78586
Q7L590	MCM10	Protein MCM10 homolog OS=Homo sapiens OX=9606 GN=MCM10 PE=1 SV=2	NA	-0.469086	1.06115	-0.878974	-1.53023	0.651258	0.409888	0.228472	0.706835	0.298483	0.852904	0.125327	0.19404
Q7L7L0	HIST3H2A	Histone H2A type 3 OS=Homo sapiens OX=9606 GN=HIST3H2A PE=1 SV=3	NA	2.52111	0.841469	2.07053	1.67965	0.390887	0.450582	0.909534	0.292538	0.386929	0.455279	0.0448875	0.126092
Q7Z2T5	TRMT1L	TRMT1-like protein OS=Homo sapiens OX=9606 GN=TRMT1L PE=1 SV=2	NA	1.35322	1.7266	-0.507242	-0.373377	-0.133865	1.86046	1.05856	1.50729	0.243504	0.265386	0.0282068	1.56969
Q7Z2W4	ZC3HAV1	Zinc finger CCCH-type antiviral protein 1 OS=Homo sapiens OX=9606 GN=ZC3HAV1 PE=1 SV=3	NA	-0.275856	0.746247	-1.21521	-1.0221	-0.193109	0.939356	0.177622	0.854143	0.505935	0.790026	0.037936	0.827705
Q7Z2W9	MRPL21	39S ribosomal protein L21, mitochondrial OS=Homo sapiens OX=9606 GN=MRPL21 PE=1 SV=2	NA	3.08784	3.55301	-0.508431	-0.465175	-0.0432559	3.59627	2.92805	3.9885	0.122315	0.257485	0.00542411	3.05965
Q7Z417	NUFIP2	Nuclear fragile X mental retardation-interacting protein 2 OS=Homo sapiens OX=9606 GN=NUFIP2 PE=1 SV=1	NA	-1.35494	-2.48639	-1.63682	1.13145	-2.76826	0.281874	0.543531	2.41123	0.298483	0.278375	1.24255	0.125916
Q7Z478	DHX29	ATP-dependent RNA helicase DHX29 OS=Homo sapiens OX=9606 GN=DHX29 PE=1 SV=2	NA	1.11346	1.60473	-0.421345	-0.491278	0.069932	1.5348	1.34309	2.15775	0.167883	0.359956	0.0171515	1.73188
Q7Z4Q2	HEATR3	HEAT repeat-containing protein 3 OS=Homo sapiens OX=9606 GN=HEATR3 PE=1 SV=2	NA	1.68118	3.31509	-0.808703	-1.63392	0.825212	2.48988	2.18237	3.86374	0.196763	1.39956	0.120304	1.93861
Q7Z4S6	KIF21A	Kinesin-like protein KIF21A OS=Homo sapiens OX=9606 GN=KIF21A PE=1 SV=2	NA	0.434962	0.938142	-0.445313	-0.50318	0.0578671	0.880275	0.229379	0.604276	0.191725	0.278375	0.0127368	0.583246
Q7Z4W1	DCXR	L-xylulose reductase OS=Homo sapiens OX=9606 GN=DCXR PE=1 SV=2	NA	0.339944	-0.0899833	0.420785	0.429927	-0.00914276	-0.0808405	0.127804	0.0315001	0.149038	0.265386	0.00477198	0.03047
Q7Z6E9	RBBP6	E3 ubiquitin-protein ligase RBBP6 OS=Homo sapiens OX=9606 GN=RBBP6 PE=1 SV=1	NA	-0.795229	0.597656	-1.57778	-1.39288	-0.184899	0.782554	0.208522	0.190077	0.315818	0.321464	0.0261385	0.309997
Q7Z6Z7	HUWE1	E3 ubiquitin-protein ligase HUWE1 OS=Homo sapiens OX=9606 GN=HUWE1 PE=1 SV=3	NA	-0.261975	-0.520201	0.619003	0.258226	0.360777	-0.880978	0.127015	0.344459	0.0940784	0.0530594	0.0289458	0.486685
Q7Z794	KRT77	Keratin, type II cytoskeletal 1b OS=Homo sapiens OX=9606 GN=KRT77 PE=2 SV=3	NA	0.177108	-1.26697	-0.804179	1.44407	-2.24825	0.981287	0.107524	1.63271	0.321706	0.948188	1.3514	1.03255
Q7Z7K6	CENPV	Centromere protein V OS=Homo sapiens OX=9606 GN=CENPV PE=1 SV=1	NA	0.873608	1.47203	0.426101	-0.598419	1.02452	0.447508	0.47878	1.11545	0.0931617	0.34079	0.270597	0.192326
Q86TU7	SETD3	Actin-histidine N-methyltransferase OS=Homo sapiens OX=9606 GN=SETD3 PE=1 SV=1	NA	-0.101052	-0.64896	0.436505	0.547907	-0.111402	-0.537558	0.0557006	0.667967	0.151549	0.363985	0.0243878	0.425397
Q86U38	NOP9	Nucleolar protein 9 OS=Homo sapiens OX=9606 GN=NOP9 PE=1 SV=1	NA	1.81701	2.40069	-0.440123	-0.583685	0.143562	2.25713	1.87093	2.82277	0.191031	0.447271	0.0334519	2.40148
Q86U86	PBRM1	Protein polybromo-1 OS=Homo sapiens OX=9606 GN=PBRM1 PE=1 SV=1	NA	0.481947	-0.0972191	-0.0339162	0.579166	-0.613082	0.515863	0.432139	0.0721066	0.00621506	0.482098	0.243617	0.417087
Q86UE4	MTDH	Protein LYRIC OS=Homo sapiens OX=9606 GN=MTDH PE=1 SV=2	NA	-0.168663	0.234013	-1.79093	-0.402675	-1.38825	1.62227	0.118624	0.187223	0.666196	0.169918	0.357406	1.52215
Q86UP2	KTN1	Kinectin OS=Homo sapiens OX=9606 GN=KTN1 PE=1 SV=1	NA	-0.465977	-0.00610292	0.19391	-0.459874	0.653784	-0.659887	0.178771	0.00260897	0.0184659	0.0992048	0.0829232	0.385078
Q86UY6	NAA40	N-alpha-acetyltransferase 40 OS=Homo sapiens OX=9606 GN=NAA40 PE=1 SV=1	NA	1.65053	2.24165	-0.372115	-0.591121	0.219006	2.02264	1.71338	2.45642	0.128266	0.404951	0.037936	1.96375
Q86V81	ALYREF	THO complex subunit 4 OS=Homo sapiens OX=9606 GN=ALYREF PE=1 SV=3	NA	0.422255	1.68976	-0.733215	-1.26751	0.534291	1.15547	0.0816496	0.582571	0.0559428	0.279254	0.0299878	0.257064
Q86VP6	CAND1	Cullin-associated NEDD8-dissociated protein 1 OS=Homo sapiens OX=9606 GN=CAND1 PE=1 SV=2	NA	1.05723	0.959276	-0.00277776	0.0979493	-0.100727	1.06	1.48661	1.17236	0.00202044	0.0346695	0.0228278	1.27305
Q86WJ1	CHD1L	Chromodomain-helicase-DNA-binding protein 1-like OS=Homo sapiens OX=9606 GN=CHD1L PE=1 SV=3	NA	0.466227	1.41887	-0.67315	-0.952641	0.279491	1.13938	0.209936	0.992283	0.298483	0.685518	0.0677251	0.747287
Q86XP3	DDX42	ATP-dependent RNA helicase DDX42 OS=Homo sapiens OX=9606 GN=DDX42 PE=1 SV=1	NA	1.40537	1.27896	1.04211	0.126407	0.915704	0.363257	0.862851	0.81202	0.141969	0.044386	0.0675567	0.0913913
Q86YP4	GATAD2A	Transcriptional repressor p66-alpha OS=Homo sapiens OX=9606 GN=GATAD2A PE=1 SV=1	NA	-0.863715	-0.271268	-0.638459	-0.592447	-0.0460121	-0.225256	0.390656	0.116943	0.0950999	0.126541	0.00503617	0.09457
Q86YZ3	NA	SWISS-PROT:Q86YZ3 Tax_Id=9606 Gene_Symbol=HRNR Hornerin	NA	0.402736	-1.37201	0.500439	1.77475	-1.27431	-0.0977025	0.190871	0.806273	0.0781275	0.663464	0.143322	0.0313289
Q8IUF8	RIOX2	Ribosomal oxygenase 2 OS=Homo sapiens OX=9606 GN=RIOX2 PE=1 SV=1	NA	1.58643	2.44122	-0.958853	-0.854789	-0.104063	2.54528	1.64485	2.65357	0.278762	0.34079	0.0143271	2.59064
Q8IWA0	WDR75	WD repeat-containing protein 75 OS=Homo sapiens OX=9606 GN=WDR75 PE=1 SV=1	NA	0.431441	1.49288	-0.396663	-1.06144	0.664775	0.828105	0.20361	1.67706	0.0582308	0.420819	0.120304	0.553335
Q8IWC1	MAP7D3	MAP7 domain-containing protein 3 OS=Homo sapiens OX=9606 GN=MAP7D3 PE=1 SV=2	NA	-1.78246	-1.85946	-0.602134	0.0770032	-0.679137	-1.18033	2.29648	2.55939	0.240236	0.0275139	0.168302	1.32335
Q8IWS0	PHF6	PHD finger protein 6 OS=Homo sapiens OX=9606 GN=PHF6 PE=1 SV=1	NA	-1.66466	-1.69746	-0.388112	0.0327983	-0.420911	-1.27655	1.98492	1.79088	0.129015	0.0115819	0.0675567	1.26537
Q8IX01	SUGP2	SURP and G-patch domain-containing protein 2 OS=Homo sapiens OX=9606 GN=SUGP2 PE=1 SV=2	NA	0.673202	1.47577	-0.905217	-0.802566	-0.102651	1.57842	0.425485	1.52074	0.300993	0.359956	0.0228278	1.58781
Q8IX18	DHX40	Probable ATP-dependent RNA helicase DHX40 OS=Homo sapiens OX=9606 GN=DHX40 PE=1 SV=2	NA	2.09693	2.64329	0.322336	-0.546358	0.868694	1.77459	1.87316	3.05681	0.0382719	0.223248	0.0782556	0.961262
Q8IXZ2	ZC3H3	Zinc finger CCCH domain-containing protein 3 OS=Homo sapiens OX=9606 GN=ZC3H3 PE=1 SV=3	NA	0.234585	1.70172	-0.962653	-1.46713	0.50448	1.19724	0.122326	2.31254	0.327269	0.845109	0.19389	1.26795
Q8IY18	SMC5	Structural maintenance of chromosomes protein 5 OS=Homo sapiens OX=9606 GN=SMC5 PE=1 SV=2	NA	1.95813	2.37605	-0.246563	-0.417922	0.171359	2.2047	2.27376	2.10975	0.0465593	0.137649	0.0228278	1.99121
Q8IY37	DHX37	Probable ATP-dependent RNA helicase DHX37 OS=Homo sapiens OX=9606 GN=DHX37 PE=1 SV=1	NA	1.8105	2.80178	-0.971782	-0.991289	0.0195064	2.78228	2.36719	3.86095	0.47101	0.852904	0.00503617	3.13224
Q8IY81	FTSJ3	pre-rRNA 2'-O-ribose RNA methyltransferase FTSJ3 OS=Homo sapiens OX=9606 GN=FTSJ3 PE=1 SV=2	NA	1.21681	1.78266	-0.130014	-0.565856	0.435842	1.34682	1.72694	2.95302	0.0382719	0.425436	0.125327	1.74142
Q8IYB8	SUPV3L1	ATP-dependent RNA helicase SUPV3L1, mitochondrial OS=Homo sapiens OX=9606 GN=SUPV3L1 PE=1 SV=1	NA	-0.289756	0.761908	-0.744321	-1.05166	0.307342	0.454566	0.154896	0.871873	0.240236	0.568896	0.0675567	0.345421
Q8IZ69	TRMT2A	tRNA (uracil-5-)-methyltransferase homolog A OS=Homo sapiens OX=9606 GN=TRMT2A PE=1 SV=2	NA	0.774691	0.456468	0.388461	0.318223	0.070238	0.38623	0.586212	0.37239	0.116079	0.131941	0.0165084	0.264066
Q8IZH2	XRN1	5'-3' exoribonuclease 1 OS=Homo sapiens OX=9606 GN=XRN1 PE=1 SV=1	NA	0.2419	1.43949	-0.44966	-1.19759	0.747934	0.691561	0.0893157	1.66711	0.0826644	0.428895	0.329293	0.58148
Q8N163	CCAR2	Cell cycle and apoptosis regulator protein 2 OS=Homo sapiens OX=9606 GN=CCAR2 PE=1 SV=2	NA	0.335897	-0.214711	-0.387024	0.550608	-0.937632	0.722921	0.203101	0.124669	0.110577	0.20925	0.262545	0.634907
Q8N1F7	NUP93	Nuclear pore complex protein Nup93 OS=Homo sapiens OX=9606 GN=NUP93 PE=1 SV=2	NA	0.990022	0.686798	0.245701	0.303223	-0.0575225	0.744321	0.828655	0.591537	0.0561602	0.120893	0.0127368	0.599865
Q8N1G2	CMTR1	Cap-specific mRNA (nucleoside-2'-O-)-methyltransferase 1 OS=Homo sapiens OX=9606 GN=CMTR1 PE=1 SV=1	NA	0.422684	0.0365702	0.22851	0.386114	-0.157604	0.194174	0.20245	0.0111799	0.0297951	0.154276	0.0141056	0.0534962
Q8N5C6	SRBD1	S1 RNA-binding domain-containing protein 1 OS=Homo sapiens OX=9606 GN=SRBD1 PE=1 SV=2	NA	1.11782	1.01066	-0.141011	0.107159	-0.24817	1.25883	0.976546	0.957183	0.0382719	0.0530594	0.0675567	1.13074
Q8N684	CPSF7	Cleavage and polyadenylation specificity factor subunit 7 OS=Homo sapiens OX=9606 GN=CPSF7 PE=1 SV=1	NA	1.68408	1.3973	0.163863	0.286782	-0.122919	1.52022	1.61243	1.95474	0.0348945	0.0925009	0.0243878	1.9517
Q8N8A6	DDX51	ATP-dependent RNA helicase DDX51 OS=Homo sapiens OX=9606 GN=DDX51 PE=1 SV=3	NA	2.17869	2.2668	-0.0699807	-0.0881084	0.0181277	2.24867	2.18681	2.71379	0.0128487	0.0424993	0.00503617	2.19482
Q8N9B5	JMY	Junction-mediating and -regulatory protein OS=Homo sapiens OX=9606 GN=JMY PE=1 SV=2	NA	1.25615	0.931384	-0.168683	0.324771	-0.493453	1.42484	0.770973	0.599648	0.0348945	0.148493	0.0899111	0.891019
Q8N9Q2	SREK1IP1	Protein SREK1IP1 OS=Homo sapiens OX=9606 GN=SREK1IP1 PE=1 SV=1	NA	0.361722	-0.300665	0.895269	0.662387	0.232882	-0.533547	0.272497	0.120379	0.191557	0.154276	0.0228278	0.254176
Q8N9T8	KRI1	Protein KRI1 homolog OS=Homo sapiens OX=9606 GN=KRI1 PE=1 SV=3	NA	0.349009	0.319853	-0.312899	0.0291564	-0.342056	0.661909	0.120515	0.120778	0.0543613	0.00891351	0.046103	0.269207
Q8NAV1	PRPF38A	Pre-mRNA-splicing factor 38A OS=Homo sapiens OX=9606 GN=PRPF38A PE=1 SV=1	NA	1.32946	1.21648	-0.299068	0.112983	-0.412051	1.62853	1.08883	0.688277	0.0610935	0.0204974	0.0396194	1.25399
Q8NC51	SERBP1	Plasminogen activator inhibitor 1 RNA-binding protein OS=Homo sapiens OX=9606 GN=SERBP1 PE=1 SV=2	NA	-1.62424	-1.81867	-0.758014	0.194434	-0.952448	-0.866222	2.1211	2.94754	0.312649	0.104037	0.357406	0.891019
Q8ND82	ZNF280C	Zinc finger protein 280C OS=Homo sapiens OX=9606 GN=ZNF280C PE=1 SV=1	NA	-2.34153	-2.42616	-1.61786	0.0846257	-1.70248	-0.723677	2.78525	3.53318	0.478672	0.0360653	0.39939	0.439917
Q8NDF8	TENT4B	Terminal nucleotidyltransferase 4B OS=Homo sapiens OX=9606 GN=TENT4B PE=1 SV=2	NA	1.3062	1.01031	0.106865	0.295895	-0.18903	1.19934	0.606016	0.4595	0.0237144	0.103991	0.0334519	0.620084
Q8NE71	ABCF1	ATP-binding cassette sub-family F member 1 OS=Homo sapiens OX=9606 GN=ABCF1 PE=1 SV=2	NA	1.74543	2.84338	-0.136066	-1.09796	0.961891	1.88149	2.24266	3.71217	0.0152795	1.07649	0.126505	1.23373
Q8NEJ9	NGDN	Neuroguidin OS=Homo sapiens OX=9606 GN=NGDN PE=1 SV=1	NA	1.51632	1.18453	-0.211833	0.331793	-0.543626	1.72816	1.82141	1.59562	0.0465973	0.137649	0.120304	2.13191
Q8NFW8	CMAS	N-acylneuraminate cytidylyltransferase OS=Homo sapiens OX=9606 GN=CMAS PE=1 SV=2	NA	2.29023	2.938	0.488822	-0.647773	1.1366	1.80141	2.22229	3.71217	0.0944472	0.321464	0.262545	1.50555
Q8NHQ9	DDX55	ATP-dependent RNA helicase DDX55 OS=Homo sapiens OX=9606 GN=DDX55 PE=1 SV=3	NA	1.66265	2.5256	-0.410716	-0.862948	0.452233	2.07337	1.75284	3.71217	0.107793	0.470415	0.108251	2.47444
Q8NI27	THOC2	THO complex subunit 2 OS=Homo sapiens OX=9606 GN=THOC2 PE=1 SV=2	NA	0.537693	0.829209	-0.824641	-0.291516	-0.533125	1.36233	0.516239	0.909644	0.246818	0.11662	0.0721191	1.21059
Q8NI36	WDR36	WD repeat-containing protein 36 OS=Homo sapiens OX=9606 GN=WDR36 PE=1 SV=1	NA	0.866122	1.71945	-1.04546	-0.853327	-0.192132	1.91158	0.85951	2.6892	0.400262	0.49368	0.037936	2.29931
Q8TBB5	KLHDC4	Kelch domain-containing protein 4 OS=Homo sapiens OX=9606 GN=KLHDC4 PE=1 SV=1	NA	1.77544	1.72821	-0.748297	0.0472355	-0.795533	2.52374	2.12814	2.62721	0.308364	0.0154241	0.320646	3.11561
Q8TBK6	ZCCHC10	Zinc finger CCHC domain-containing protein 10 OS=Homo sapiens OX=9606 GN=ZCCHC10 PE=1 SV=1	NA	2.82355	2.51685	-0.220758	0.306699	-0.527457	3.04431	2.12814	3.71217	0.0354073	0.0773075	0.125327	3.18174
Q8TCJ2	STT3B	Dolichyl-diphosphooligosaccharide--protein glycosyltransferase subunit STT3B OS=Homo sapiens OX=9606 GN=STT3B PE=1 SV=1	NA	2.00914	3.25354	-1.22343	-1.2444	0.0209712	3.23257	2.52455	4.04234	0.752996	1.07649	0.00503617	3.3922
Q8TDD1	DDX54	ATP-dependent RNA helicase DDX54 OS=Homo sapiens OX=9606 GN=DDX54 PE=1 SV=2	NA	4.25909	5.47516	-0.845422	-1.21607	0.37065	5.10451	1.74834	2.50931	0.259698	0.618683	0.0726063	2.40557
Q8TDN6	BRIX1	Ribosome biogenesis protein BRX1 homolog OS=Homo sapiens OX=9606 GN=BRIX1 PE=1 SV=2	NA	2.23825	2.4268	-0.703012	-0.188556	-0.514456	2.94126	2.34904	1.67706	0.246818	0.0340794	0.0519615	3.13224
Q8TED0	UTP15	U3 small nucleolar RNA-associated protein 15 homolog OS=Homo sapiens OX=9606 GN=UTP15 PE=1 SV=3	NA	1.79192	0.499113	1.37913	1.29281	0.0863245	0.412789	1.35204	0.145257	0.312649	0.298524	0.00503617	0.143604
Q8TEQ6	GEMIN5	Gem-associated protein 5 OS=Homo sapiens OX=9606 GN=GEMIN5 PE=1 SV=3	NA	0.385997	0.460745	-0.155123	-0.0747477	-0.0803756	0.541121	0.157638	0.270347	0.017791	0.0154241	0.012118	0.269207
Q8TEX9	IPO4	Importin-4 OS=Homo sapiens OX=9606 GN=IPO4 PE=1 SV=2	NA	0.802263	1.33272	1.27904	-0.530456	1.8095	-0.476778	0.390656	1.91571	0.268473	0.127826	0.836856	0.343156
Q8WTT2	NOC3L	Nucleolar complex protein 3 homolog OS=Homo sapiens OX=9606 GN=NOC3L PE=1 SV=1	NA	0.429289	1.27235	-0.404033	-0.843065	0.439033	0.833321	0.399954	2.05962	0.123527	0.628193	0.0910408	0.78513
Q8WU90	ZC3H15	Zinc finger CCCH domain-containing protein 15 OS=Homo sapiens OX=9606 GN=ZC3H15 PE=1 SV=1	NA	-3.15791	-2.836	-1.45049	-0.321905	-1.12858	-1.70742	2.73742	2.68421	0.67779	0.142034	0.329293	1.46922
Q8WUA4	GTF3C2	General transcription factor 3C polypeptide 2 OS=Homo sapiens OX=9606 GN=GTF3C2 PE=1 SV=2	NA	1.41903	1.09906	-0.30577	0.319964	-0.625733	1.72479	1.28447	0.811194	0.0950999	0.127185	0.120304	1.50163
Q8WUM4	PDCD6IP	Programmed cell death 6-interacting protein OS=Homo sapiens OX=9606 GN=PDCD6IP PE=1 SV=1	NA	-0.197437	0.601499	-0.338841	-0.798936	0.460095	0.141404	0.108412	0.533732	0.0940784	0.514606	0.102463	0.0729151
Q8WW12	PCNP	PEST proteolytic signal-containing nuclear protein OS=Homo sapiens OX=9606 GN=PCNP PE=1 SV=2	NA	-2.28584	-2.5767	-1.36642	0.290863	-1.65728	-0.919416	2.11432	2.71328	0.535094	0.126541	0.693869	0.702848
Q8WWK9	CKAP2	Cytoskeleton-associated protein 2 OS=Homo sapiens OX=9606 GN=CKAP2 PE=1 SV=1	NA	-0.50964	0.859165	-1.73358	-1.3688	-0.364773	1.22394	0.338094	0.723576	0.643632	0.685518	0.0515779	0.988118
Q8WWQ0	PHIP	PH-interacting protein OS=Homo sapiens OX=9606 GN=PHIP PE=1 SV=2	NA	0.4399	1.41924	-0.855316	-0.979336	0.12402	1.29522	0.165045	1.46273	0.191725	0.32175	0.0265969	1.16119
Q8WWY3	PRPF31	U4/U6 small nuclear ribonucleoprotein Prp31 OS=Homo sapiens OX=9606 GN=PRPF31 PE=1 SV=2	NA	2.15725	1.8348	-0.625564	0.322447	-0.948011	2.78281	1.45693	1.23417	0.123527	0.0522319	0.124596	2.85964
Q8WYA6	CTNNBL1	Beta-catenin-like protein 1 OS=Homo sapiens OX=9606 GN=CTNNBL1 PE=1 SV=1	NA	1.16373	0.169456	0.210702	0.994276	-0.783574	0.95303	1.28103	0.0599338	0.0348945	0.298524	0.0675567	0.54277
Q8WYP5	AHCTF1	Protein ELYS OS=Homo sapiens OX=9606 GN=AHCTF1 PE=1 SV=3	NA	-0.126337	1.20603	-1.72105	-1.33237	-0.388683	1.59471	0.0525079	0.817372	0.81468	0.623275	0.0612529	1.3255
Q92522	H1FX	Histone H1x OS=Homo sapiens OX=9606 GN=H1FX PE=1 SV=1	NA	-0.29112	-1.45738	3.88112	1.16626	2.71486	-4.17224	0.165733	1.37926	2.67924	0.723316	1.24255	3.29171
Q92572	AP3S1	AP-3 complex subunit sigma-1 OS=Homo sapiens OX=9606 GN=AP3S1 PE=1 SV=1	NA	0.0641346	0.849242	-0.297433	-0.785108	0.487674	0.361568	0.0270689	0.616495	0.0944472	0.598131	0.10422	0.187211
Q92576	PHF3	PHD finger protein 3 OS=Homo sapiens OX=9606 GN=PHF3 PE=1 SV=3	NA	-1.28114	-0.921072	0.135559	-0.360063	0.495622	-1.41669	1.07966	0.683218	0.0303441	0.12593	0.0677251	1.17404
Q92598	HSPH1	Heat shock protein 105 kDa OS=Homo sapiens OX=9606 GN=HSPH1 PE=1 SV=1	NA	-0.15187	-0.0744841	-0.872416	-0.0773857	-0.79503	0.720546	0.0516168	0.0368766	0.211857	0.0154241	0.252522	0.598174
Q92616	GCN1	eIF-2-alpha kinase activator GCN1 OS=Homo sapiens OX=9606 GN=GCN1 PE=1 SV=6	NA	-0.936705	-0.223213	-1.26187	-0.713492	-0.548376	0.325162	0.747684	0.100922	0.47101	0.227168	0.0675567	0.198367
Q92620	DHX38	Pre-mRNA-splicing factor ATP-dependent RNA helicase PRP16 OS=Homo sapiens OX=9606 GN=DHX38 PE=1 SV=2	NA	2.0351	1.92634	0.763079	0.10876	0.654319	1.27202	2.10806	1.85872	0.246818	0.0360653	0.102463	0.974813
Q92688	ANP32B	Acidic leucine-rich nuclear phosphoprotein 32 family member B OS=Homo sapiens OX=9606 GN=ANP32B PE=1 SV=1	NA	2.37189	1.29732	-0.0254	1.07457	-1.09997	2.39729	1.56848	1.81417	0.00407757	0.325953	0.251933	2.05942
Q92794	KAT6A	Histone acetyltransferase KAT6A OS=Homo sapiens OX=9606 GN=KAT6A PE=1 SV=2	NA	0.163032	1.38704	-0.857759	-1.22401	0.366248	1.02079	0.0469103	0.75332	0.231272	0.52854	0.0519615	0.489852
Q92841	DDX17	Probable ATP-dependent RNA helicase DDX17 OS=Homo sapiens OX=9606 GN=DDX17 PE=1 SV=2	NA	2.53754	1.94897	0.173541	0.588579	-0.415038	2.364	2.55024	3.19635	0.0332432	0.339018	0.0675567	2.16683
Q92900	UPF1	Regulator of nonsense transcripts 1 OS=Homo sapiens OX=9606 GN=UPF1 PE=1 SV=2	NA	0.693261	1.1499	-0.138104	-0.456636	0.318532	0.831365	0.428256	0.939967	0.0354405	0.294325	0.0677251	0.549739
Q92973	TNPO1	Transportin-1 OS=Homo sapiens OX=9606 GN=TNPO1 PE=1 SV=2	NA	0.342436	-0.262555	0.763937	0.604991	0.158945	-0.4215	0.223373	0.140188	0.246818	0.316739	0.0228278	0.216996
Q92974	ARHGEF2	Rho guanine nucleotide exchange factor 2 OS=Homo sapiens OX=9606 GN=ARHGEF2 PE=1 SV=4	NA	0.593126	1.61691	-1.25987	-1.02378	-0.236084	1.85299	0.441734	2.56021	0.478672	0.532727	0.0633129	2.40821
Q969Q0	RPL36AL	60S ribosomal protein L36a-like OS=Homo sapiens OX=9606 GN=RPL36AL PE=1 SV=3	NA	-1.9684	-1.36903	-1.09568	-0.599372	-0.496312	-0.872713	1.59066	1.12148	0.41863	0.279254	0.0925024	0.604066
Q969X6	UTP4	U3 small nucleolar RNA-associated protein 4 homolog OS=Homo sapiens OX=9606 GN=UTP4 PE=1 SV=1	NA	1.46347	1.3719	-0.314591	0.091565	-0.406156	1.77806	1.87836	1.78412	0.0950999	0.034042	0.0713647	2.06527
Q96A33	CCDC47	Coiled-coil domain-containing protein 47 OS=Homo sapiens OX=9606 GN=CCDC47 PE=1 SV=1	NA	1.45459	0.475189	-0.355063	0.979402	-1.33446	1.80965	0.757109	0.128243	0.0768764	0.253587	0.143322	0.920567
Q96A35	MRPL24	39S ribosomal protein L24, mitochondrial OS=Homo sapiens OX=9606 GN=MRPL24 PE=1 SV=1	NA	1.71312	1.3917	0.551946	0.32142	0.230527	1.16117	2.12716	2.27016	0.168505	0.201243	0.0381978	1.11209
Q96AG4	LRRC59	Leucine-rich repeat-containing protein 59 OS=Homo sapiens OX=9606 GN=LRRC59 PE=1 SV=1	NA	-1.08051	-1.18087	-0.076037	0.100359	-0.176396	-1.00447	1.26091	1.58642	0.0106549	0.0416537	0.0261385	0.791873
Q96C36	PYCR2	Pyrroline-5-carboxylate reductase 2 OS=Homo sapiens OX=9606 GN=PYCR2 PE=1 SV=1	NA	0.602118	-0.132122	0.0225975	0.73424	-0.711643	0.579521	0.568643	0.0986779	0.00407757	0.628193	0.161848	0.378502
Q96CT7	CCDC124	Coiled-coil domain-containing protein 124 OS=Homo sapiens OX=9606 GN=CCDC124 PE=1 SV=1	NA	-0.0400091	-2.24769	0.0264512	2.20768	-2.18123	-0.0664603	0.0118241	2.61002	0.00407757	0.69104	0.678426	0.031439
Q96CW1	AP2M1	AP-2 complex subunit mu OS=Homo sapiens OX=9606 GN=AP2M1 PE=1 SV=2	NA	-0.630785	-0.168478	-0.571202	-0.462307	-0.108895	-0.0595831	0.677206	0.126064	0.231272	0.279254	0.0228278	0.0341647
Q96D46	NMD3	60S ribosomal export protein NMD3 OS=Homo sapiens OX=9606 GN=NMD3 PE=1 SV=1	NA	1.55414	1.9765	-0.177738	-0.422358	0.24462	1.73188	1.49816	2.39972	0.0382719	0.190135	0.0448875	1.78861
Q96DV4	MRPL38	39S ribosomal protein L38, mitochondrial OS=Homo sapiens OX=9606 GN=MRPL38 PE=1 SV=2	NA	1.11829	1.63284	-0.229851	-0.514544	0.284693	1.34814	0.79527	1.2581	0.0526555	0.210679	0.0448875	1.04231
Q96EY4	TMA16	Translation machinery-associated protein 16 OS=Homo sapiens OX=9606 GN=TMA16 PE=1 SV=2	NA	0.387696	0.229165	-0.338586	0.158531	-0.497117	0.726282	0.228472	0.142664	0.0872027	0.0573363	0.10422	0.521358
Q96EY7	PTCD3	Pentatricopeptide repeat domain-containing protein 3, mitochondrial OS=Homo sapiens OX=9606 GN=PTCD3 PE=1 SV=3	NA	1.49913	0.700797	0.626193	0.798333	-0.17214	0.872937	0.99271	0.35486	0.146714	0.291077	0.0228278	0.46969
Q96G21	IMP4	U3 small nucleolar ribonucleoprotein protein IMP4 OS=Homo sapiens OX=9606 GN=IMP4 PE=1 SV=1	NA	1.23176	1.17358	-0.182114	0.0581783	-0.240293	1.41387	0.821182	0.82359	0.0354405	0.0154241	0.0299878	1.03311
Q96G23	CERS2	Ceramide synthase 2 OS=Homo sapiens OX=9606 GN=CERS2 PE=1 SV=1	NA	0.545469	-0.04518	-0.232783	0.590649	-0.823432	0.778252	0.252863	0.0190503	0.0382719	0.196144	0.283904	0.577678
Q96GM8	TOE1	Target of EGR1 protein 1 OS=Homo sapiens OX=9606 GN=TOE1 PE=1 SV=1	NA	1.89172	2.73055	-0.497112	-0.838827	0.341715	2.38883	1.0699	1.88654	0.150231	0.472288	0.102463	1.61727
Q96GQ7	DDX27	Probable ATP-dependent RNA helicase DDX27 OS=Homo sapiens OX=9606 GN=DDX27 PE=1 SV=2	NA	2.63501	3.10047	-0.386022	-0.46546	0.0794382	3.02103	2.92805	4.04234	0.134042	0.344668	0.0197053	3.29171
Q96HA1	POM121	Nuclear envelope pore membrane protein POM 121 OS=Homo sapiens OX=9606 GN=POM121 PE=1 SV=2	NA	1.27448	0.952249	-0.685702	0.322229	-1.00793	1.96018	1.08883	1.17012	0.211857	0.103161	0.414717	2.40821
Q96HS1	PGAM5	Serine/threonine-protein phosphatase PGAM5, mitochondrial OS=Homo sapiens OX=9606 GN=PGAM5 PE=1 SV=2	NA	0.985207	1.54451	-1.05961	-0.559306	-0.500308	2.04482	0.4457	1.29185	0.224091	0.137649	0.0721191	1.59853
Q96KR1	ZFR	Zinc finger RNA-binding protein OS=Homo sapiens OX=9606 GN=ZFR PE=1 SV=2	NA	-1.46857	-0.874999	-1.74494	-0.593573	-1.15136	0.276366	1.35324	0.8822	0.648311	0.304781	0.329293	0.141726
Q96L91	EP400	E1A-binding protein p400 OS=Homo sapiens OX=9606 GN=EP400 PE=1 SV=4	NA	0.645884	1.1526	-0.230547	-0.506715	0.276168	0.876431	0.431287	1.00787	0.0781275	0.342773	0.0675567	0.679497
Q96MU7	YTHDC1	YTH domain-containing protein 1 OS=Homo sapiens OX=9606 GN=YTHDC1 PE=1 SV=3	NA	-0.0169535	0.461448	-0.570672	-0.478401	-0.092271	0.553719	0.00440462	0.30302	0.0951109	0.196144	0.0127368	0.24135
Q96P11	NSUN5	Probable 28S rRNA (cytosine-C(5))-methyltransferase OS=Homo sapiens OX=9606 GN=NSUN5 PE=1 SV=2	NA	0.787849	1.48609	-0.713549	-0.69824	-0.0153082	1.5014	0.741487	1.84382	0.278762	0.424991	0.0049824	1.60014
Q96P47	AGAP3	Arf-GAP with GTPase, ANK repeat and PH domain-containing protein 3 OS=Homo sapiens OX=9606 GN=AGAP3 PE=1 SV=2	NA	1.47854	1.5994	-0.0964295	-0.12086	0.0244306	1.57496	1.56939	1.17649	0.0261725	0.027978	0.0049824	1.66376
Q96PK6	RBM14	RNA-binding protein 14 OS=Homo sapiens OX=9606 GN=RBM14 PE=1 SV=2	NA	1.39959	1.07876	-0.084874	0.320831	-0.405705	1.48446	1.10465	0.908433	0.0129295	0.102032	0.0677251	1.36544
Q96QC0	PPP1R10	Serine/threonine-protein phosphatase 1 regulatory subunit 10 OS=Homo sapiens OX=9606 GN=PPP1R10 PE=1 SV=1	NA	-0.703312	-0.356541	-0.552682	-0.346771	-0.205911	-0.15063	0.495516	0.459385	0.140167	0.11662	0.0472139	0.107893
Q96QD9	FYTTD1	UAP56-interacting factor OS=Homo sapiens OX=9606 GN=FYTTD1 PE=1 SV=3	NA	0.740998	2.56468	-1.17514	-1.82368	0.648543	1.91613	0.385007	3.47462	0.246818	0.69104	0.124596	1.76437
Q96RP9	GFM1	Elongation factor G, mitochondrial OS=Homo sapiens OX=9606 GN=GFM1 PE=1 SV=2	NA	1.71927	1.9446	-0.233882	-0.225325	-0.00855657	1.95316	1.7682	2.38864	0.0448038	0.101296	0.00463192	1.78682
Q96RQ3	MCCC1	Methylcrotonoyl-CoA carboxylase subunit alpha, mitochondrial OS=Homo sapiens OX=9606 GN=MCCC1 PE=1 SV=3	NA	0.66282	0.00328813	1.84812	0.659531	1.18859	-1.1853	0.817341	0.00194313	0.395395	0.598131	0.134158	0.584237
Q96S44	TP53RK	EKC/KEOPS complex subunit TP53RK OS=Homo sapiens OX=9606 GN=TP53RK PE=1 SV=2	NA	2.52963	2.09753	-0.475161	0.432103	-0.907264	3.00479	1.85939	1.18261	0.134042	0.0866027	0.120304	2.75377
Q96SB4	SRPK1	SRSF protein kinase 1 OS=Homo sapiens OX=9606 GN=SRPK1 PE=1 SV=2	NA	1.98212	2.7983	-0.576038	-0.816175	0.240137	2.55816	2.56029	3.67825	0.197453	0.663464	0.037936	2.69421
Q96ST3	SIN3A	Paired amphipathic helix protein Sin3a OS=Homo sapiens OX=9606 GN=SIN3A PE=1 SV=2	NA	1.06315	1.39381	-0.413626	-0.330666	-0.0829593	1.47677	0.707151	1.16834	0.0947977	0.0945287	0.0141056	1.3176
Q96T37	RBM15	RNA-binding protein 15 OS=Homo sapiens OX=9606 GN=RBM15 PE=1 SV=2	NA	1.59831	0.441172	0.125372	1.15714	-1.03177	1.47294	1.36728	0.277169	0.0371717	0.852904	0.447834	1.23373
Q96T88	UHRF1	E3 ubiquitin-protein ligase UHRF1 OS=Homo sapiens OX=9606 GN=UHRF1 PE=1 SV=1	NA	1.63303	1.75218	0.249603	-0.119144	0.368747	1.38343	1.45454	1.93328	0.0463545	0.0319197	0.0675567	1.41015
Q99442	SEC62	Translocation protein SEC62 OS=Homo sapiens OX=9606 GN=SEC62 PE=1 SV=1	NA	-0.928681	-0.826462	-0.976605	-0.102218	-0.874387	0.0479249	0.586212	0.789966	0.191031	0.0173201	0.120304	0.0217613
Q99459	CDC5L	Cell division cycle 5-like protein OS=Homo sapiens OX=9606 GN=CDC5L PE=1 SV=2	NA	-0.820592	-1.60878	-0.325178	0.788192	-1.11337	-0.495415	0.53924	1.25322	0.073818	0.365154	0.262545	0.256219
Q99543	DNAJC2	DnaJ homolog subfamily C member 2 OS=Homo sapiens OX=9606 GN=DNAJC2 PE=1 SV=4	NA	2.24348	2.9287	-0.280132	-0.685219	0.405087	2.52361	2.42804	3.4827	0.0574086	0.471841	0.0675567	2.34505
Q99575	POP1	Ribonucleases P/MRP protein subunit POP1 OS=Homo sapiens OX=9606 GN=POP1 PE=1 SV=2	NA	NA	NA	-1.2359	-1.17018	-0.0657194	NA	NA	NA	0.666196	0.845109	0.0179747	NA
Q99575	POP1	Ribonucleases P/MRP protein subunit POP1 OS=Homo sapiens OX=9606 GN=POP1 PE=1 SV=2	endonuclease	1.29993	2.47012	NA	NA	NA	2.53584	1.61243	3.53318	NA	NA	NA	3.13224
Q99598	TSNAX	Translin-associated protein X OS=Homo sapiens OX=9606 GN=TSNAX PE=1 SV=1	NA	1.08375	0.750377	0.0329354	0.333374	-0.300439	1.05082	0.924539	0.542336	0.00407757	0.140064	0.0396194	0.749553
Q99613	EIF3C	Eukaryotic translation initiation factor 3 subunit C OS=Homo sapiens OX=9606 GN=EIF3C PE=1 SV=1	translation initiation factor (eIF)	1.85448	2.21877	NA	NA	NA	2.00014	2.1211	2.88113	NA	NA	NA	2.15073
Q99613	EIF3C	Eukaryotic translation initiation factor 3 subunit C OS=Homo sapiens OX=9606 GN=EIF3C PE=1 SV=1	NA	NA	NA	-0.145665	-0.364292	0.218627	NA	NA	NA	0.0382719	0.257485	0.0448875	NA
Q99623	PHB2	Prohibitin-2 OS=Homo sapiens OX=9606 GN=PHB2 PE=1 SV=2	NA	2.22069	2.95292	-1.09145	-0.73223	-0.35922	3.31214	2.15907	3.58357	0.316912	0.444286	0.0612529	2.88365
Q99661	KIF2C	Kinesin-like protein KIF2C OS=Homo sapiens OX=9606 GN=KIF2C PE=1 SV=2	NA	0.746669	0.327207	0.308684	0.419462	-0.110778	0.437985	0.821182	0.256792	0.0944472	0.196144	0.0228278	0.35124
Q99714	HSD17B10	3-hydroxyacyl-CoA dehydrogenase type-2 OS=Homo sapiens OX=9606 GN=HSD17B10 PE=1 SV=3	NA	0.614923	0.580242	0.381309	0.034681	0.346628	0.233614	0.518273	0.616744	0.125591	0.0143352	0.0782462	0.155799
Q99729	HNRNPAB	Heterogeneous nuclear ribonucleoprotein A/B OS=Homo sapiens OX=9606 GN=HNRNPAB PE=1 SV=2	NA	-1.31331	-1.87727	-0.416858	0.563969	-0.980827	-0.896447	0.976491	1.77699	0.125591	0.253587	0.357406	0.709311
Q99733	NAP1L4	Nucleosome assembly protein 1-like 4 OS=Homo sapiens OX=9606 GN=NAP1L4 PE=1 SV=1	NA	-0.00900299	-0.0834031	0.94323	0.0744001	0.86883	-0.952233	0.00168776	0.0229721	0.308364	0.0204492	0.178136	0.397709
Q99798	ACO2	Aconitate hydratase, mitochondrial OS=Homo sapiens OX=9606 GN=ACO2 PE=1 SV=2	NA	0.804934	1.02437	-0.417901	-0.219434	-0.198467	1.22284	0.611831	0.975274	0.140167	0.107877	0.0396194	1.04379
Q99832	CCT7	T-complex protein 1 subunit eta OS=Homo sapiens OX=9606 GN=CCT7 PE=1 SV=2	NA	1.84008	1.50669	0.180952	0.333383	-0.152432	1.65913	2.1211	2.01859	0.0378915	0.200726	0.0232892	1.45471
Q99848	EBNA1BP2	Probable rRNA-processing protein EBP2 OS=Homo sapiens OX=9606 GN=EBNA1BP2 PE=1 SV=2	NA	0.0228904	0.673114	-0.0572305	-0.650224	0.592993	0.0801209	0.00822315	0.397156	0.00788468	0.190793	0.0899111	0.0435148
Q99873	PRMT1	Protein arginine N-methyltransferase 1 OS=Homo sapiens OX=9606 GN=PRMT1 PE=1 SV=3	NA	-0.221458	0.683209	-1.11871	-0.904667	-0.214039	0.897248	0.0557006	0.152233	0.0882983	0.101296	0.0106635	0.201711
Q99956	DUSP9	Dual specificity protein phosphatase 9 OS=Homo sapiens OX=9606 GN=DUSP9 PE=1 SV=1	NA	1.61366	1.54835	-0.0381972	0.0653157	-0.103513	1.65186	1.92689	2.29167	0.00517611	0.0218043	0.0228278	1.71982
Q99986	VRK1	Serine/threonine-protein kinase VRK1 OS=Homo sapiens OX=9606 GN=VRK1 PE=1 SV=1	NA	0.932454	2.16877	-1.36634	-1.23631	-0.130023	2.29879	1.00377	2.56021	0.699328	0.710709	0.0243878	2.76127
Q9BPW8	NIPSNAP1	Protein NipSnap homolog 1 OS=Homo sapiens OX=9606 GN=NIPSNAP1 PE=1 SV=1	NA	2.68706	2.5442	1.70356	0.142862	1.5607	0.983494	1.73139	1.70654	0.535094	0.0424993	0.357406	0.455953
Q9BQ39	DDX50	ATP-dependent RNA helicase DDX50 OS=Homo sapiens OX=9606 GN=DDX50 PE=1 SV=1	NA	2.38282	2.60393	-0.516079	-0.221108	-0.29497	2.8989	2.9018	3.67825	0.246818	0.128587	0.0677251	3.29171
Q9BQ52	ELAC2	Zinc phosphodiesterase ELAC protein 2 OS=Homo sapiens OX=9606 GN=ELAC2 PE=1 SV=2	NA	-0.211158	-0.923918	-0.256298	0.71276	-0.969058	0.0451396	0.0921721	0.731336	0.0421471	0.291077	0.251933	0.0206844
Q9BQ70	TCF25	Transcription factor 25 OS=Homo sapiens OX=9606 GN=TCF25 PE=1 SV=1	NA	0.862225	0.87376	-0.637971	-0.011535	-0.626436	1.5002	0.38403	0.400587	0.140436	0.00443837	0.0782556	0.856894
Q9BQ75	CMSS1	Protein CMSS1 OS=Homo sapiens OX=9606 GN=CMSS1 PE=1 SV=2	NA	2.24157	2.79459	-1.05488	-0.553026	-0.501856	3.29645	2.56029	3.23703	0.41863	0.284382	0.0854013	3.29171
Q9BQE3	TUBA1C	Tubulin alpha-1C chain OS=Homo sapiens OX=9606 GN=TUBA1C PE=1 SV=1	NA	2.62303	2.76642	0.304877	-0.14339	0.448267	2.31815	1.74834	1.89948	0.111815	0.0518154	0.102463	1.63858
Q9BQG0	MYBBP1A	Myb-binding protein 1A OS=Homo sapiens OX=9606 GN=MYBBP1A PE=1 SV=2	NA	1.41056	3.092	-1.57689	-1.68144	0.104546	2.98746	1.57567	3.71217	0.699328	0.977375	0.0228278	3.29171
Q9BR76	CORO1B	Coronin-1B OS=Homo sapiens OX=9606 GN=CORO1B PE=1 SV=1	NA	-2.5057	-2.47574	-0.452073	-0.0299552	-0.422117	-2.05362	2.57701	3.09956	0.0875216	0.00977478	0.0515779	1.7356
Q9BRJ2	MRPL45	39S ribosomal protein L45, mitochondrial OS=Homo sapiens OX=9606 GN=MRPL45 PE=1 SV=2	NA	2.80031	3.38637	0.705685	-0.586061	1.29175	2.09463	2.92805	4.04234	0.159974	0.384813	0.297559	1.73188
Q9BRP8	PYM1	Partner of Y14 and mago OS=Homo sapiens OX=9606 GN=PYM1 PE=1 SV=1	NA	0.923034	1.40916	-0.138088	-0.486126	0.348038	1.06112	0.797045	2.03084	0.0261725	0.20788	0.0675567	1.02636
Q9BSC4	NOL10	Nucleolar protein 10 OS=Homo sapiens OX=9606 GN=NOL10 PE=1 SV=1	NA	1.81114	2.76054	-0.821549	-0.949399	0.12785	2.63269	2.372	3.77651	0.316912	0.755452	0.0243878	2.9602
Q9BSJ2	TUBGCP2	Gamma-tubulin complex component 2 OS=Homo sapiens OX=9606 GN=TUBGCP2 PE=1 SV=2	NA	-0.373929	-0.542224	0.302037	0.168295	0.133742	-0.675966	0.164959	0.274196	0.0504831	0.0360653	0.0197053	0.376162
Q9BTE7	DCUN1D5	DCN1-like protein 5 OS=Homo sapiens OX=9606 GN=DCUN1D5 PE=1 SV=1	NA	1.46733	1.5804	0.0143168	-0.11307	0.127387	1.45301	1.38321	1.7594	0.00407757	0.0424993	0.0265969	1.48706
Q9BTX1	NDC1	Nucleoporin NDC1 OS=Homo sapiens OX=9606 GN=NDC1 PE=1 SV=2	NA	-0.129041	0.2935	-0.505048	-0.422541	-0.0825067	0.376007	0.0683692	0.190916	0.148334	0.21473	0.0141056	0.208332
Q9BU76	MMTAG2	Multiple myeloma tumor-associated protein 2 OS=Homo sapiens OX=9606 GN=MMTAG2 PE=1 SV=1	NA	-1.32751	-1.97468	-0.441735	0.647176	-1.08891	-0.885771	1.29952	2.19453	0.134042	0.417408	0.357406	0.687192
Q9BUF5	TUBB6	Tubulin beta-6 chain OS=Homo sapiens OX=9606 GN=TUBB6 PE=1 SV=1	NA	2.06393	2.57384	1.45246	-0.509909	1.96237	0.611474	1.56451	3.47462	0.244545	0.137818	0.329293	0.247244
Q9BUJ2	HNRNPUL1	Heterogeneous nuclear ribonucleoprotein U-like protein 1 OS=Homo sapiens OX=9606 GN=HNRNPUL1 PE=1 SV=2	NA	0.653757	0.261353	-0.0198026	0.392404	-0.412207	0.673559	0.577481	0.0939719	0.00407757	0.0837445	0.037936	0.516979
Q9BUQ8	DDX23	Probable ATP-dependent RNA helicase DDX23 OS=Homo sapiens OX=9606 GN=DDX23 PE=1 SV=3	NA	1.16643	2.27231	-0.037623	-1.10588	1.06825	1.20405	0.900083	3.23703	0.00407757	0.507725	0.297559	0.996223
Q9BV20	MRI1	Methylthioribose-1-phosphate isomerase OS=Homo sapiens OX=9606 GN=MRI1 PE=1 SV=1	NA	0.239042	0.203967	-0.942209	0.035075	-0.977284	1.18125	0.0892559	0.111412	0.192438	0.00710386	0.19389	1.04379
Q9BVA1	TUBB2B	Tubulin beta-2B chain OS=Homo sapiens OX=9606 GN=TUBB2B PE=1 SV=1	NA	1.88066	1.35759	2.04943	0.52307	1.52636	-0.168766	1.70509	1.21805	0.43148	0.137649	0.229325	0.0608506
Q9BVI4	NOC4L	Nucleolar complex protein 4 homolog OS=Homo sapiens OX=9606 GN=NOC4L PE=1 SV=1	NA	1.4368	0.94362	-0.235314	0.493178	-0.728493	1.67211	0.950447	0.505578	0.0522684	0.137649	0.125327	1.36552
Q9BVJ6	UTP14A	U3 small nucleolar RNA-associated protein 14 homolog A OS=Homo sapiens OX=9606 GN=UTP14A PE=1 SV=1	NA	-0.867786	-0.539959	-1.07244	-0.327828	-0.744608	0.204649	0.425818	0.370653	0.235369	0.0624068	0.133081	0.110753
Q9BVP2	GNL3	Guanine nucleotide-binding protein-like 3 OS=Homo sapiens OX=9606 GN=GNL3 PE=1 SV=2	NA	1.25761	0.848846	0.944207	0.408761	0.535446	0.3134	1.59376	1.32821	0.41863	0.225512	0.165903	0.268675
Q9BVS4	RIOK2	Serine/threonine-protein kinase RIO2 OS=Homo sapiens OX=9606 GN=RIOK2 PE=1 SV=2	NA	1.56956	-0.27835	-0.552515	1.84791	-2.40043	2.12208	2.12716	0.060106	0.191725	0.325953	0.251933	2.36672
Q9BWE0	REPIN1	Replication initiator 1 OS=Homo sapiens OX=9606 GN=REPIN1 PE=1 SV=1	NA	-1.96582	0.484664	-2.45919	-2.45048	-0.00870694	0.493371	1.14067	0.414591	0.67779	0.845987	0.00477198	0.37221
Q9BXJ9	NAA15	N-alpha-acetyltransferase 15, NatA auxiliary subunit OS=Homo sapiens OX=9606 GN=NAA15 PE=1 SV=1	NA	1.75814	2.81908	-0.397604	-1.06094	0.663336	2.15575	2.1368	3.67825	0.139243	0.69104	0.251933	2.79493
Q9BXP5	SRRT	Serrate RNA effector molecule homolog OS=Homo sapiens OX=9606 GN=SRRT PE=1 SV=1	NA	0.136449	1.3255	-1.00958	-1.18905	0.179473	1.14602	0.0427372	0.939145	0.294408	0.472288	0.0334519	0.791873
Q9BXS5	AP1M1	AP-1 complex subunit mu-1 OS=Homo sapiens OX=9606 GN=AP1M1 PE=1 SV=3	NA	0.78275	1.0011	-0.246296	-0.218355	-0.0279416	1.02905	0.586212	0.898064	0.0382719	0.0771557	0.0049824	0.624836
Q9BY44	EIF2A	Eukaryotic translation initiation factor 2A OS=Homo sapiens OX=9606 GN=EIF2A PE=1 SV=3	NA	-1.70192	-0.138531	-2.44979	-1.56339	-0.886402	0.747871	1.87683	0.0518145	0.854569	0.557066	0.0921889	0.486685
Q9BY77	POLDIP3	Polymerase delta-interacting protein 3 OS=Homo sapiens OX=9606 GN=POLDIP3 PE=1 SV=2	NA	-0.978467	-1.55236	-1.31843	0.573889	-1.89231	0.339958	0.65237	1.59657	0.41863	0.223248	0.866074	0.194868
Q9BYC9	MRPL20	39S ribosomal protein L20, mitochondrial OS=Homo sapiens OX=9606 GN=MRPL20 PE=1 SV=1	NA	0.948235	1.83141	-0.780064	-0.883178	0.103114	1.7283	0.39347	1.04853	0.0826644	0.137649	0.008124	0.955834
Q9BYD3	MRPL4	39S ribosomal protein L4, mitochondrial OS=Homo sapiens OX=9606 GN=MRPL4 PE=1 SV=1	NA	1.84944	1.72612	1.49525	0.123317	1.37193	0.354188	1.75945	1.58402	0.67779	0.0310945	0.414717	0.267942
Q9BYD6	MRPL1	39S ribosomal protein L1, mitochondrial OS=Homo sapiens OX=9606 GN=MRPL1 PE=1 SV=2	NA	1.00187	1.08292	0.0962892	-0.0810472	0.177336	0.905585	0.540979	0.589255	0.0261725	0.0236235	0.0273877	0.502877
Q9BYG3	NIFK	MKI67 FHA domain-interacting nucleolar phosphoprotein OS=Homo sapiens OX=9606 GN=NIFK PE=1 SV=1	NA	1.76289	1.91276	-0.598141	-0.149873	-0.448268	2.36103	1.75694	1.66954	0.207557	0.0399102	0.0675567	2.32239
Q9BZE4	GTPBP4	Nucleolar GTP-binding protein 1 OS=Homo sapiens OX=9606 GN=GTPBP4 PE=1 SV=3	NA	1.42707	3.40183	-1.5688	-1.97477	0.405968	2.99587	1.46955	4.04234	0.648311	1.15781	0.102463	3.29171
Q9BZI7	UPF3B	Regulator of nonsense transcripts 3B OS=Homo sapiens OX=9606 GN=UPF3B PE=1 SV=1	NA	-0.240978	-0.99311	-0.0568866	0.752132	-0.809019	-0.184091	0.11083	0.782803	0.00621506	0.321464	0.126505	0.0762631
Q9BZJ0	CRNKL1	Crooked neck-like protein 1 OS=Homo sapiens OX=9606 GN=CRNKL1 PE=1 SV=4	NA	1.4975	1.28275	-0.0326037	0.214749	-0.247353	1.5301	1.41223	1.37729	0.00407757	0.0934742	0.0448875	1.39984
Q9BZX2	UCK2	Uridine-cytidine kinase 2 OS=Homo sapiens OX=9606 GN=UCK2 PE=1 SV=1	NA	0.628285	0.437039	0.581279	0.191246	0.390032	0.0470068	0.772828	0.603904	0.16362	0.107877	0.0675567	0.0240788
Q9BZZ5	API5	Apoptosis inhibitor 5 OS=Homo sapiens OX=9606 GN=API5 PE=1 SV=3	NA	0.508651	0.01275	0.182298	0.495901	-0.313603	0.326353	0.415798	0.00606527	0.0375329	0.236745	0.0461368	0.195455
Q9C0C9	UBE2O	(E3-independent) E2 ubiquitin-conjugating enzyme OS=Homo sapiens OX=9606 GN=UBE2O PE=1 SV=3	NA	0.867975	-0.480675	1.44025	1.34865	0.0915995	-0.572275	0.381007	0.173949	0.350799	0.513566	0.0107543	0.203506
Q9GZR2	REXO4	RNA exonuclease 4 OS=Homo sapiens OX=9606 GN=REXO4 PE=1 SV=2	NA	1.14567	2.32595	-1.07356	-1.18028	0.106719	2.21924	1.14542	2.82277	0.538364	0.852904	0.0243878	2.41006
Q9GZR7	DDX24	ATP-dependent RNA helicase DDX24 OS=Homo sapiens OX=9606 GN=DDX24 PE=1 SV=1	NA	2.02877	3.125	-0.953305	-1.09623	0.142929	2.98207	2.46964	4.04234	0.41863	0.852904	0.0265969	3.29171
Q9GZS1	POLR1E	DNA-directed RNA polymerase I subunit RPA49 OS=Homo sapiens OX=9606 GN=POLR1E PE=1 SV=3	NA	1.14125	1.82818	-0.802303	-0.686926	-0.115377	1.94355	1.12513	2.56276	0.244545	0.359956	0.0228278	1.94685
Q9H089	LSG1	Large subunit GTPase 1 homolog OS=Homo sapiens OX=9606 GN=LSG1 PE=1 SV=2	NA	0.535811	2.5915	-0.671637	-2.05569	1.38405	1.20745	0.155276	2.67813	0.0510067	0.541783	0.125327	0.431949
Q9H0A0	NAT10	RNA cytidine acetyltransferase OS=Homo sapiens OX=9606 GN=NAT10 PE=1 SV=2	NA	0.886292	2.50107	-1.10415	-1.61478	0.510631	1.99044	0.821182	3.53561	0.41863	1.07649	0.147262	2.26567
Q9H0D6	XRN2	5'-3' exoribonuclease 2 OS=Homo sapiens OX=9606 GN=XRN2 PE=1 SV=1	NA	NA	NA	-0.973377	-0.404283	-0.569094	NA	NA	NA	0.41863	0.266321	0.161848	NA
Q9H0D6	XRN2	5'-3' exoribonuclease 2 OS=Homo sapiens OX=9606 GN=XRN2 PE=1 SV=1	endonuclease	1.2989	1.70319	NA	NA	NA	2.27228	1.52872	2.31974	NA	NA	NA	2.44781
Q9H0H5	RACGAP1	Rac GTPase-activating protein 1 OS=Homo sapiens OX=9606 GN=RACGAP1 PE=1 SV=1	NA	1.12798	1.49467	-0.0937459	-0.36669	0.272944	1.22173	0.797045	1.39025	0.0134776	0.107261	0.0448875	1.13074
Q9H0S4	DDX47	Probable ATP-dependent RNA helicase DDX47 OS=Homo sapiens OX=9606 GN=DDX47 PE=1 SV=1	NA	2.11879	2.56587	-0.488638	-0.447073	-0.0415645	2.60743	2.36719	2.82277	0.0781275	0.205557	0.00503617	1.73227
Q9H0U3	MAGT1	Magnesium transporter protein 1 OS=Homo sapiens OX=9606 GN=MAGT1 PE=1 SV=1	NA	1.07928	2.98199	-1.25894	-1.9027	0.643763	2.33822	1.28447	3.36169	0.666196	1.39483	0.168302	2.68595
Q9H0U4	RAB1B	Ras-related protein Rab-1B OS=Homo sapiens OX=9606 GN=RAB1B PE=1 SV=1	NA	-0.591325	-0.00370714	-0.610832	-0.587618	-0.0232138	0.0195067	0.442913	0.00172691	0.204118	0.444286	0.00503617	0.00843655
Q9H0W5	CCDC8	Coiled-coil domain-containing protein 8 OS=Homo sapiens OX=9606 GN=CCDC8 PE=1 SV=2	NA	1.75372	1.49179	-0.0934989	0.261938	-0.355437	1.84722	1.14174	1.00127	0.0240824	0.140862	0.0921254	1.26795
Q9H2G2	SLK	STE20-like serine/threonine-protein kinase OS=Homo sapiens OX=9606 GN=SLK PE=1 SV=1	NA	-0.332094	-0.648197	-0.431158	0.316103	-0.747261	0.0990633	0.196924	0.552619	0.133807	0.168967	0.251933	0.0472476
Q9H2P0	ADNP	Activity-dependent neuroprotector homeobox protein OS=Homo sapiens OX=9606 GN=ADNP PE=1 SV=1	NA	0.210357	-0.346374	-0.919207	0.556732	-1.47594	1.12956	0.0899521	0.197	0.353181	0.318035	0.952073	0.835886
Q9H2U1	DHX36	ATP-dependent DNA/RNA helicase DHX36 OS=Homo sapiens OX=9606 GN=DHX36 PE=1 SV=2	NA	1.53702	2.173	0.27118	-0.63598	0.907159	1.26584	1.60784	2.31517	0.0382719	0.279254	0.11539	0.791873
Q9H307	PNN	Pinin OS=Homo sapiens OX=9606 GN=PNN PE=1 SV=5	NA	0.948838	0.277772	-0.997781	0.671066	-1.66885	1.94662	1.08106	0.284041	0.395395	0.433147	0.852762	2.19721
Q9H3N1	TMX1	Thioredoxin-related transmembrane protein 1 OS=Homo sapiens OX=9606 GN=TMX1 PE=1 SV=1	NA	2.595	2.89398	-0.731492	-0.298985	-0.432507	3.32649	1.06946	1.48302	0.0574086	0.0301678	0.0261385	1.9662
Q9H3P7	ACBD3	Golgi resident protein GCP60 OS=Homo sapiens OX=9606 GN=ACBD3 PE=1 SV=4	NA	-0.192789	-0.0792991	-1.01042	-0.11349	-0.89693	0.817631	0.0490896	0.0239964	0.16362	0.0156219	0.112219	0.392555
Q9H444	CHMP4B	Charged multivesicular body protein 4b OS=Homo sapiens OX=9606 GN=CHMP4B PE=1 SV=1	NA	-0.804065	-0.0617606	-2.20539	-0.742305	-1.46308	1.40132	0.276163	0.0174019	0.497082	0.142034	0.320651	0.875855
Q9H4L4	SENP3	Sentrin-specific protease 3 OS=Homo sapiens OX=9606 GN=SENP3 PE=1 SV=2	NA	2.78116	3.62995	-0.80997	-0.848788	0.0388179	3.59113	2.78525	4.04234	0.316912	0.548945	0.0127368	3.6062
Q9H583	HEATR1	HEAT repeat-containing protein 1 OS=Homo sapiens OX=9606 GN=HEATR1 PE=1 SV=3	NA	0.4655	0.866294	-0.18952	-0.400794	0.211274	0.65502	0.390656	0.793744	0.0379397	0.132662	0.0261385	0.514143
Q9H5V9	CXorf56	UPF0428 protein CXorf56 OS=Homo sapiens OX=9606 GN=CXorf56 PE=1 SV=1	NA	-3.21374	-3.7579	-0.824882	0.544161	-1.36904	-2.38886	2.92805	4.02926	0.278762	0.342773	0.506818	2.37438
Q9H6R0	DHX33	ATP-dependent RNA helicase DHX33 OS=Homo sapiens OX=9606 GN=DHX33 PE=1 SV=2	NA	1.8063	2.20204	-0.075033	-0.395744	0.320711	1.88133	1.48954	2.33882	0.00801317	0.137649	0.037936	1.43213
Q9H6R4	NOL6	Nucleolar protein 6 OS=Homo sapiens OX=9606 GN=NOL6 PE=1 SV=2	NA	0.712321	0.96032	-0.486538	-0.247999	-0.238539	1.19886	0.649381	0.892237	0.146714	0.0673126	0.0334519	1.32449
Q9H6S0	YTHDC2	3'-5' RNA helicase YTHDC2 OS=Homo sapiens OX=9606 GN=YTHDC2 PE=1 SV=2	NA	1.85873	1.84839	-0.242482	0.0103421	-0.252824	2.10121	2.20902	2.61514	0.0901865	0.00651034	0.0675567	2.46344
Q9H773	DCTPP1	dCTP pyrophosphatase 1 OS=Homo sapiens OX=9606 GN=DCTPP1 PE=1 SV=1	NA	0.399814	0.978657	-0.392868	-0.578843	0.185975	0.792682	0.272759	1.0311	0.131738	0.420819	0.037936	0.633773
Q9H7B2	RPF2	Ribosome production factor 2 homolog OS=Homo sapiens OX=9606 GN=RPF2 PE=1 SV=2	NA	1.72157	2.35745	-0.877219	-0.635885	-0.241334	2.59879	1.44566	3.12107	0.235369	0.246625	0.0389713	2.70107
Q9H7E9	C8orf33	UPF0488 protein C8orf33 OS=Homo sapiens OX=9606 GN=C8orf33 PE=1 SV=1	NA	2.79576	3.18796	-0.105566	-0.392197	0.286631	2.90132	2.92805	3.91604	0.0348889	0.236745	0.0675567	3.29171
Q9H8H2	DDX31	Probable ATP-dependent RNA helicase DDX31 OS=Homo sapiens OX=9606 GN=DDX31 PE=1 SV=2	NA	1.51787	1.97868	-1.26849	-0.460809	-0.807679	2.78636	1.32294	1.96284	0.316912	0.1299	0.120304	2.46377
Q9H9B4	SFXN1	Sideroflexin-1 OS=Homo sapiens OX=9606 GN=SFXN1 PE=1 SV=4	NA	0.910823	2.48892	-0.969219	-1.5781	0.608882	1.88004	0.810283	1.99432	0.235369	0.580206	0.0645645	1.48159
Q9H9L3	ISG20L2	Interferon-stimulated 20 kDa exonuclease-like 2 OS=Homo sapiens OX=9606 GN=ISG20L2 PE=1 SV=1	NA	0.47406	1.3177	-1.86424	-0.843644	-1.0206	2.3383	0.213178	1.27073	0.615485	0.316739	0.357406	2.19721
Q9H9T3	ELP3	Elongator complex protein 3 OS=Homo sapiens OX=9606 GN=ELP3 PE=1 SV=2	NA	0.30654	1.02055	-0.901047	-0.714011	-0.187036	1.20759	0.217211	1.27185	0.328868	0.36554	0.0335379	1.3799
Q9H9Y2	RPF1	Ribosome production factor 1 OS=Homo sapiens OX=9606 GN=RPF1 PE=1 SV=2	NA	1.33054	1.54916	0.223271	-0.218621	0.441892	1.10727	1.02663	2.26599	0.0371717	0.0604103	0.0677251	0.924743
Q9HAU5	UPF2	Regulator of nonsense transcripts 2 OS=Homo sapiens OX=9606 GN=UPF2 PE=1 SV=1	NA	1.9234	2.71838	0.175905	-0.794978	0.970883	1.7475	1.34901	3.10178	0.0106549	0.257137	0.0675567	0.687192
Q9HC35	EML4	Echinoderm microtubule-associated protein-like 4 OS=Homo sapiens OX=9606 GN=EML4 PE=1 SV=3	NA	0.644522	1.4312	-0.82529	-0.786676	-0.0386141	1.46981	0.22829	0.676175	0.312649	0.359956	0.00704957	0.753492
Q9HCE1	MOV10	Helicase MOV-10 OS=Homo sapiens OX=9606 GN=MOV10 PE=1 SV=2	defense response to virus	1.31104	1.71504	NA	NA	NA	2.36213	1.86669	2.14765	NA	NA	NA	2.89602
Q9HCE1	MOV10	Helicase MOV-10 OS=Homo sapiens OX=9606 GN=MOV10 PE=1 SV=2	NA	NA	NA	-1.05109	-0.404003	-0.647091	NA	NA	NA	0.525134	0.190793	0.147262	NA
Q9HCG8	CWC22	Pre-mRNA-splicing factor CWC22 homolog OS=Homo sapiens OX=9606 GN=CWC22 PE=1 SV=3	NA	1.76735	0.938494	0.013187	0.82886	-0.815673	1.75417	1.4849	0.593056	0.00407757	0.403072	0.178136	1.47039
Q9HCS7	XAB2	Pre-mRNA-splicing factor SYF1 OS=Homo sapiens OX=9606 GN=XAB2 PE=1 SV=2	NA	-1.13961	0.434791	-2.06494	-1.5744	-0.490538	0.925329	0.733295	0.228023	0.81468	0.845109	0.0782556	0.585976
Q9HCU5	PREB	Prolactin regulatory element-binding protein OS=Homo sapiens OX=9606 GN=PREB PE=1 SV=2	NA	0.261092	0.389058	0.0441416	-0.127967	0.172108	0.21695	0.146274	0.256881	0.00621506	0.0329142	0.0265969	0.141726
Q9HD33	MRPL47	39S ribosomal protein L47, mitochondrial OS=Homo sapiens OX=9606 GN=MRPL47 PE=1 SV=2	NA	-0.32478	1.24221	-0.261302	-1.56699	1.30569	-0.0634785	0.0597945	0.854623	0.0119244	0.265386	0.102463	0.0132199
Q9HDC5	JPH1	Junctophilin-1 OS=Homo sapiens OX=9606 GN=JPH1 PE=1 SV=2	NA	0.772643	1.32551	-0.0462598	-0.552863	0.506603	0.818903	0.375052	0.683218	0.00991918	0.223248	0.0782556	0.422355
Q9NP79	VTA1	Vacuolar protein sorting-associated protein VTA1 homolog OS=Homo sapiens OX=9606 GN=VTA1 PE=1 SV=1	NA	1.42978	1.37811	-0.307487	0.0516675	-0.359155	1.73726	1.30756	1.53256	0.073818	0.0154241	0.0675567	1.84453
Q9NQ55	PPAN	Suppressor of SWI4 1 homolog OS=Homo sapiens OX=9606 GN=PPAN PE=2 SV=1	NA	0.848951	3.01392	-1.86736	-2.16497	0.29761	2.71631	0.812641	3.86095	0.81468	1.39956	0.0645645	3.00075
Q9NQW6	ANLN	Anillin OS=Homo sapiens OX=9606 GN=ANLN PE=1 SV=2	NA	-0.36711	0.214903	-0.0989473	-0.582013	0.483066	-0.268163	0.237019	0.198492	0.00801317	0.257137	0.0448875	0.0957703
Q9NQZ2	UTP3	Something about silencing protein 10 OS=Homo sapiens OX=9606 GN=UTP3 PE=1 SV=1	NA	1.6001	3.06114	-0.532988	-1.46104	0.928047	2.13309	1.92086	3.46252	0.149038	0.852904	0.223061	2.15563
Q9NR30	DDX21	Nucleolar RNA helicase 2 OS=Homo sapiens OX=9606 GN=DDX21 PE=1 SV=5	NA	NA	NA	-1.01743	-1.44531	0.427882	NA	NA	NA	0.359846	0.948188	0.0782556	NA
Q9NR30	DDX21	Nucleolar RNA helicase 2 OS=Homo sapiens OX=9606 GN=DDX21 PE=1 SV=5	defense response to virus	1.98493	3.43023	NA	NA	NA	3.00235	2.29648	4.04234	NA	NA	NA	3.13224
Q9NRL2	BAZ1A	Bromodomain adjacent to zinc finger domain protein 1A OS=Homo sapiens OX=9606 GN=BAZ1A PE=1 SV=2	NA	1.09797	1.69664	-0.619458	-0.598675	-0.0207832	1.71743	1.36169	2.62721	0.246818	0.385377	0.00503617	2.1501
Q9NRX1	PNO1	RNA-binding protein PNO1 OS=Homo sapiens OX=9606 GN=PNO1 PE=1 SV=1	NA	1.80235	2.28213	-0.562344	-0.479787	-0.0825569	2.36469	1.94049	2.71328	0.173028	0.178157	0.0143271	2.82591
Q9NRZ9	HELLS	Lymphoid-specific helicase OS=Homo sapiens OX=9606 GN=HELLS PE=1 SV=1	NA	0.735732	1.75961	-1.13308	-1.02387	-0.109202	1.86881	0.706914	2.30898	0.643632	0.789629	0.0261385	2.17678
Q9NS69	TOMM22	Mitochondrial import receptor subunit TOM22 homolog OS=Homo sapiens OX=9606 GN=TOMM22 PE=1 SV=3	NA	2.45933	2.48075	0.812518	-0.0214136	0.833931	1.64681	1.98492	2.11291	0.197427	0.00889038	0.120304	0.974813
Q9NSD9	FARSB	Phenylalanine--tRNA ligase beta subunit OS=Homo sapiens OX=9606 GN=FARSB PE=1 SV=3	NA	1.20583	1.14287	-0.802631	0.0629619	-0.865592	2.00846	1.56004	1.59657	0.308364	0.0199389	0.262545	2.37438
Q9NSE4	IARS2	Isoleucine--tRNA ligase, mitochondrial OS=Homo sapiens OX=9606 GN=IARS2 PE=1 SV=2	NA	0.546749	0.89692	-0.216529	-0.350171	0.133643	0.763277	0.463984	1.025	0.0671344	0.260472	0.0282068	0.678105
Q9NTI5	PDS5B	Sister chromatid cohesion protein PDS5 homolog B OS=Homo sapiens OX=9606 GN=PDS5B PE=1 SV=1	NA	0.963788	1.35095	-0.350633	-0.387162	0.0365285	1.31442	0.743545	1.25109	0.138568	0.253214	0.0106635	1.13794
Q9NTJ3	SMC4	Structural maintenance of chromosomes protein 4 OS=Homo sapiens OX=9606 GN=SMC4 PE=1 SV=2	NA	0.192429	0.611665	-0.654722	-0.419235	-0.235487	0.847152	0.0920929	0.352147	0.224748	0.126541	0.0282068	0.674948
Q9NTK5	OLA1	Obg-like ATPase 1 OS=Homo sapiens OX=9606 GN=OLA1 PE=1 SV=2	NA	1.12005	0.918508	-0.22106	0.201546	-0.422606	1.34111	1.18055	1.02159	0.0583825	0.109993	0.103273	1.31985
Q9NU22	MDN1	Midasin OS=Homo sapiens OX=9606 GN=MDN1 PE=1 SV=2	NA	-0.563618	-0.392781	-0.266824	-0.170838	-0.0959864	-0.296794	0.390656	0.279977	0.0465973	0.0624068	0.0143271	0.141726
Q9NUL7	DDX28	Probable ATP-dependent RNA helicase DDX28 OS=Homo sapiens OX=9606 GN=DDX28 PE=1 SV=2	NA	1.55018	1.70817	-0.73654	-0.157995	-0.578545	2.28672	1.47666	1.96284	0.235369	0.0374252	0.120304	2.80807
Q9NUQ6	SPATS2L	SPATS2-like protein OS=Homo sapiens OX=9606 GN=SPATS2L PE=1 SV=2	NA	-1.285	-2.33691	-0.153519	1.05191	-1.20543	-1.13148	0.612224	1.33981	0.0348889	0.46089	0.320646	0.567678
Q9NV06	DCAF13	DDB1- and CUL4-associated factor 13 OS=Homo sapiens OX=9606 GN=DCAF13 PE=1 SV=2	NA	2.01832	2.71068	-0.462439	-0.692353	0.229914	2.48076	2.2647	3.58724	0.191557	0.498047	0.0675567	2.946
Q9NV31	IMP3	U3 small nucleolar ribonucleoprotein protein IMP3 OS=Homo sapiens OX=9606 GN=IMP3 PE=1 SV=1	NA	2.14631	2.23342	0.158185	-0.0871091	0.245294	1.98813	2.36384	2.63284	0.0379397	0.0319197	0.037936	2.03969
Q9NVI7	ATAD3A	ATPase family AAA domain-containing protein 3A OS=Homo sapiens OX=9606 GN=ATAD3A PE=1 SV=2	NA	1.49542	1.3812	0.0948205	0.114223	-0.0194026	1.4006	1.30728	1.1075	0.0218204	0.0424993	0.0049824	1.07205
Q9NVN8	GNL3L	Guanine nucleotide-binding protein-like 3-like protein OS=Homo sapiens OX=9606 GN=GNL3L PE=1 SV=1	NA	2.09214	2.46678	0.0664754	-0.37464	0.441115	2.02566	2.41326	3.23703	0.0150688	0.291077	0.120304	2.28794
Q9NVP1	DDX18	ATP-dependent RNA helicase DDX18 OS=Homo sapiens OX=9606 GN=DDX18 PE=1 SV=2	NA	0.69716	1.25557	0.048084	-0.55841	0.606494	0.649076	0.809383	2.14803	0.00991918	0.444286	0.28272	0.701177
Q9NVU7	SDAD1	Protein SDA1 homolog OS=Homo sapiens OX=9606 GN=SDAD1 PE=1 SV=3	NA	0.988499	1.85968	-0.399094	-0.871177	0.472083	1.38759	1.18276	2.93685	0.138568	0.663464	0.133081	1.6432
Q9NVV4	MTPAP	Poly(A) RNA polymerase, mitochondrial OS=Homo sapiens OX=9606 GN=MTPAP PE=1 SV=1	NA	0.663473	1.09997	-0.284048	-0.436494	0.152446	0.947521	0.306355	0.608831	0.0944472	0.290354	0.0265969	0.492456
Q9NW13	RBM28	RNA-binding protein 28 OS=Homo sapiens OX=9606 GN=RBM28 PE=1 SV=3	NA	2.53409	3.04995	-0.635947	-0.515864	-0.120083	3.17004	2.9018	3.23703	0.298483	0.225512	0.0228278	3.35602
Q9NWK9	ZNHIT6	Box C/D snoRNA protein 1 OS=Homo sapiens OX=9606 GN=ZNHIT6 PE=1 SV=1	NA	-0.159781	-0.271977	-1.13479	0.112196	-1.24699	0.975011	0.0436666	0.0734725	0.246818	0.0154241	0.126505	0.712178
Q9NWT1	PAK1IP1	p21-activated protein kinase-interacting protein 1 OS=Homo sapiens OX=9606 GN=PAK1IP1 PE=1 SV=2	NA	0.328811	1.00665	-0.63379	-0.677842	0.0440519	0.9626	0.352205	1.50475	0.316912	0.53687	0.0127368	1.17719
Q9NWT8	AURKAIP1	Aurora kinase A-interacting protein OS=Homo sapiens OX=9606 GN=AURKAIP1 PE=1 SV=1	NA	-2.14016	-0.810704	-0.508744	-1.32946	0.820714	-1.63142	1.78354	0.419215	0.131738	0.409869	0.103273	1.62214
Q9NWU5	MRPL22	39S ribosomal protein L22, mitochondrial OS=Homo sapiens OX=9606 GN=MRPL22 PE=1 SV=1	NA	2.35836	2.18499	-0.0497974	0.173374	-0.223171	2.40816	1.79887	1.89196	0.00407757	0.0319197	0.0243878	2.21991
Q9NX58	LYAR	Cell growth-regulating nucleolar protein OS=Homo sapiens OX=9606 GN=LYAR PE=1 SV=2	NA	0.220654	-0.499947	0.879244	0.720601	0.158643	-0.65859	0.132363	0.42233	0.246818	0.49368	0.0228278	0.377098
Q9NXF1	TEX10	Testis-expressed protein 10 OS=Homo sapiens OX=9606 GN=TEX10 PE=1 SV=2	NA	1.81266	2.78864	-0.671225	-0.975978	0.304753	2.48388	1.71543	3.86095	0.211857	0.473511	0.0832823	3.12401
Q9NXH9	TRMT1	tRNA (guanine(26)-N(2))-dimethyltransferase OS=Homo sapiens OX=9606 GN=TRMT1 PE=1 SV=1	NA	0.608098	1.39186	-0.579991	-0.783763	0.203772	1.18809	0.698788	2.33882	0.246818	0.612704	0.0435678	1.43883
Q9NXV6	CDKN2AIP	CDKN2A-interacting protein OS=Homo sapiens OX=9606 GN=CDKN2AIP PE=1 SV=3	NA	0.149434	0.566631	-0.764645	-0.417197	-0.347448	0.914079	0.102127	0.649171	0.353181	0.278375	0.0899111	0.961262
Q9NY61	AATF	Protein AATF OS=Homo sapiens OX=9606 GN=AATF PE=1 SV=1	NA	0.944197	1.12338	0.405435	-0.179183	0.584618	0.538762	0.758107	0.968508	0.124417	0.0632769	0.120304	0.33328
Q9NY93	DDX56	Probable ATP-dependent RNA helicase DDX56 OS=Homo sapiens OX=9606 GN=DDX56 PE=1 SV=1	NA	2.04623	2.80887	-0.620381	-0.762642	0.142261	2.66661	2.25261	3.71217	0.197427	0.46089	0.0261385	2.88365
Q9NYH9	UTP6	U3 small nucleolar RNA-associated protein 6 homolog OS=Homo sapiens OX=9606 GN=UTP6 PE=2 SV=2	NA	1.26823	1.72294	0.041918	-0.454711	0.496629	1.22631	0.89974	1.63016	0.00621506	0.222994	0.179008	1.01248
Q9NYV4	CDK12	Cyclin-dependent kinase 12 OS=Homo sapiens OX=9606 GN=CDK12 PE=1 SV=2	NA	0.373337	1.56508	-1.03649	-1.19174	0.155251	1.40982	0.177622	2.49731	0.278762	0.472288	0.0371446	1.72313
Q9NZ01	TECR	Very-long-chain enoyl-CoA reductase OS=Homo sapiens OX=9606 GN=TECR PE=1 SV=1	NA	1.40055	3.02984	-0.153713	-1.62928	1.47557	1.55427	0.844096	3.67825	0.0150688	0.581299	0.354203	1.19563
Q9NZB2	FAM120A	Constitutive coactivator of PPAR-gamma-like protein 1 OS=Homo sapiens OX=9606 GN=FAM120A PE=1 SV=2	NA	1.89642	1.30238	0.0584569	0.594038	-0.535581	1.83796	1.88643	0.89101	0.0106549	0.205557	0.0677251	1.77261
Q9NZC9	SMARCAL1	SWI/SNF-related matrix-associated actin-dependent regulator of chromatin subfamily A-like protein 1 OS=Homo sapiens OX=9606 GN=SMARCAL1 PE=1 SV=1	NA	0.789645	1.58891	-0.837505	-0.799265	-0.0382406	1.62715	0.351232	0.920322	0.296601	0.3804	0.00703324	0.974813
Q9NZE8	MRPL35	39S ribosomal protein L35, mitochondrial OS=Homo sapiens OX=9606 GN=MRPL35 PE=1 SV=3	NA	0.356963	0.573631	-1.59719	-0.216668	-1.38052	1.95415	0.233888	0.37114	0.41863	0.0610058	0.251933	1.35796
Q9NZI8	IGF2BP1	Insulin-like growth factor 2 mRNA-binding protein 1 OS=Homo sapiens OX=9606 GN=IGF2BP1 PE=1 SV=2	NA	1.85697	1.31291	-0.249668	0.544066	-0.793734	2.10664	1.5874	0.911371	0.0574086	0.22639	0.133706	1.69611
Q9NZM5	NOP53	Ribosome biogenesis protein NOP53 OS=Homo sapiens OX=9606 GN=NOP53 PE=1 SV=2	NA	1.82521	1.66465	-1.0185	0.160564	-1.17906	2.84371	0.797045	0.817372	0.303453	0.0496339	0.444662	1.5377
Q9NZZ3	CHMP5	Charged multivesicular body protein 5 OS=Homo sapiens OX=9606 GN=CHMP5 PE=1 SV=1	NA	-2.01744	-1.82479	0.362709	-0.19265	0.555359	-2.38015	1.75111	1.11605	0.073818	0.0360653	0.0533538	1.88309
Q9P015	MRPL15	39S ribosomal protein L15, mitochondrial OS=Homo sapiens OX=9606 GN=MRPL15 PE=1 SV=1	NA	1.31144	0.756609	0.838074	0.554829	0.283245	0.473364	1.28339	0.438725	0.298483	0.153934	0.0282068	0.33336
Q9P031	CCDC59	Thyroid transcription factor 1-associated protein 26 OS=Homo sapiens OX=9606 GN=CCDC59 PE=1 SV=2	NA	1.1051	1.34286	-1.17175	-0.237753	-0.933999	2.27686	0.706703	1.03823	0.316912	0.0925009	0.189671	1.57009
Q9P035	HACD3	Very-long-chain (3R)-3-hydroxyacyl-CoA dehydratase 3 OS=Homo sapiens OX=9606 GN=HACD3 PE=1 SV=2	NA	1.12234	1.85328	-0.0111189	-0.730943	0.719824	1.13346	1.62591	2.75769	0.00407757	0.52346	0.252522	1.41264
Q9P0M6	H2AFY2	Core histone macro-H2A.2 OS=Homo sapiens OX=9606 GN=H2AFY2 PE=1 SV=3	NA	-2.41982	-2.38104	0.0242512	-0.0387825	0.0630337	-2.44407	2.36719	2.89823	0.00407757	0.0145602	0.0143271	2.81285
Q9P258	RCC2	Protein RCC2 OS=Homo sapiens OX=9606 GN=RCC2 PE=1 SV=2	NA	0.202019	0.902489	-0.467028	-0.70047	0.233442	0.669047	0.117436	0.878246	0.124417	0.470415	0.0334519	0.417087
Q9P275	USP36	Ubiquitin carboxyl-terminal hydrolase 36 OS=Homo sapiens OX=9606 GN=USP36 PE=1 SV=4	NA	2.11101	2.85926	-1.09192	-0.748252	-0.343665	3.20293	2.34795	3.22706	0.497082	0.410687	0.0675567	3.29171
Q9P287	BCCIP	BRCA2 and CDKN1A-interacting protein OS=Homo sapiens OX=9606 GN=BCCIP PE=1 SV=1	NA	0.6009	0.870736	-0.360684	-0.269835	-0.0908481	0.961584	0.541742	0.736243	0.125591	0.107877	0.0146062	0.835886
Q9P2D1	CHD7	Chromodomain-helicase-DNA-binding protein 7 OS=Homo sapiens OX=9606 GN=CHD7 PE=1 SV=3	NA	1.16287	0.307748	0.760536	0.855121	-0.094585	0.402333	0.743377	0.154287	0.246818	0.399977	0.0205764	0.208332
Q9P2E9	RRBP1	Ribosome-binding protein 1 OS=Homo sapiens OX=9606 GN=RRBP1 PE=1 SV=5	NA	1.77846	2.4918	-0.599238	-0.713349	0.114112	2.37769	1.48954	2.67959	0.211857	0.409869	0.0261385	2.35888
Q9P2J5	LARS	Leucine--tRNA ligase, cytoplasmic OS=Homo sapiens OX=9606 GN=LARS PE=1 SV=2	NA	1.06118	1.35721	-0.397399	-0.296031	-0.101368	1.45858	1.37822	1.79088	0.151549	0.133122	0.0228278	1.91852
Q9P2N5	RBM27	RNA-binding protein 27 OS=Homo sapiens OX=9606 GN=RBM27 PE=1 SV=2	NA	-1.51843	-3.09472	-0.360869	1.57629	-1.93716	-1.15756	1.54827	3.59382	0.073818	0.921634	0.683403	0.918281
Q9UBB9	TFIP11	Tuftelin-interacting protein 11 OS=Homo sapiens OX=9606 GN=TFIP11 PE=1 SV=1	NA	-0.997209	-1.32843	-0.698103	0.331218	-1.02932	-0.299106	1.26844	1.79072	0.259698	0.190793	0.329293	0.195183
Q9UBE0	SAE1	SUMO-activating enzyme subunit 1 OS=Homo sapiens OX=9606 GN=SAE1 PE=1 SV=1	NA	0.743272	0.340565	0.571732	0.402707	0.169025	0.171541	0.902089	0.368991	0.246818	0.278375	0.0366268	0.116581
Q9UBT2	UBA2	SUMO-activating enzyme subunit 2 OS=Homo sapiens OX=9606 GN=UBA2 PE=1 SV=2	NA	1.55307	0.800766	-0.188376	0.752302	-0.940678	1.74144	1.52872	0.688277	0.0382719	0.283698	0.2201	1.88143
Q9UBU9	NXF1	Nuclear RNA export factor 1 OS=Homo sapiens OX=9606 GN=NXF1 PE=1 SV=1	NA	1.38206	2.3413	-0.871739	-0.959238	0.0874988	2.2538	1.70025	3.09956	0.316912	0.698401	0.0171515	2.37796
Q9UBX3	SLC25A10	Mitochondrial dicarboxylate carrier OS=Homo sapiens OX=9606 GN=SLC25A10 PE=1 SV=2	NA	1.85515	2.73932	-1.07814	-0.884174	-0.193966	2.93329	0.812641	2.70574	0.152528	0.180435	0.0265969	2.46377
Q9UG63	ABCF2	ATP-binding cassette sub-family F member 2 OS=Homo sapiens OX=9606 GN=ABCF2 PE=1 SV=2	NA	0.777219	2.31743	-1.45686	-1.54021	0.0833537	2.23408	0.821449	3.23852	0.67779	1.03855	0.0209788	2.65867
Q9UGN5	PARP2	Poly [ADP-ribose] polymerase 2 OS=Homo sapiens OX=9606 GN=PARP2 PE=1 SV=2	NA	0.804519	1.8427	-0.748604	-1.03818	0.28958	1.55312	0.784042	2.30211	0.316912	0.789629	0.0675567	1.63858
Q9UGU5	HMGXB4	HMG domain-containing protein 4 OS=Homo sapiens OX=9606 GN=HMGXB4 PE=1 SV=2	NA	0.222837	0.490738	0.711137	-0.267902	0.979039	-0.4883	0.0899521	0.347889	0.0944472	0.0530594	0.0988698	0.195225
Q9UH62	ARMCX3	Armadillo repeat-containing X-linked protein 3 OS=Homo sapiens OX=9606 GN=ARMCX3 PE=1 SV=1	NA	1.46448	1.61845	0.222758	-0.153976	0.376733	1.24172	0.69258	0.844147	0.0382719	0.0424993	0.0633129	0.603491
Q9UHA3	RSL24D1	Probable ribosome biogenesis protein RLP24 OS=Homo sapiens OX=9606 GN=RSL24D1 PE=1 SV=1	NA	-0.708556	-1.08675	0.286816	0.378189	-0.0913729	-0.995373	0.506448	0.992283	0.0944472	0.227168	0.0228278	0.811629
Q9UHB7	AFF4	AF4/FMR2 family member 4 OS=Homo sapiens OX=9606 GN=AFF4 PE=1 SV=1	NA	1.03557	0.613472	1.98783	0.422099	1.56573	-0.952262	0.740091	0.286225	0.699328	0.126541	0.297559	0.534773
Q9UHB9	SRP68	Signal recognition particle subunit SRP68 OS=Homo sapiens OX=9606 GN=SRP68 PE=1 SV=2	NA	1.84378	2.75344	-0.744831	-0.909658	0.164827	2.58861	2.29648	3.58357	0.298483	0.598131	0.0265969	3.00476
Q9UHD8	SEPTIN9	Septin-9 OS=Homo sapiens OX=9606 GN=SEPTIN9 PE=1 SV=2	NA	-0.0338321	-0.308791	-0.356096	0.274959	-0.631054	0.322263	0.0166017	0.352934	0.0781275	0.11662	0.126505	0.19819
Q9UI10	EIF2B4	Translation initiation factor eIF-2B subunit delta OS=Homo sapiens OX=9606 GN=EIF2B4 PE=1 SV=2	NA	0.859406	1.46804	-0.456578	-0.608633	0.152055	1.31598	1.13083	2.59572	0.138568	0.487839	0.0261385	1.35246
Q9UIF9	BAZ2A	Bromodomain adjacent to zinc finger domain protein 2A OS=Homo sapiens OX=9606 GN=BAZ2A PE=1 SV=4	NA	0.0198242	0.910107	-0.755784	-0.890282	0.134498	0.775609	0.00822315	0.95412	0.298814	0.591019	0.0265969	0.679152
Q9UIG0	BAZ1B	Tyrosine-protein kinase BAZ1B OS=Homo sapiens OX=9606 GN=BAZ1B PE=1 SV=2	NA	-0.178205	1.34824	-1.48689	-1.52645	0.0395539	1.30869	0.109835	1.97297	0.643632	0.852904	0.00903387	1.53579
Q9UJS0	SLC25A13	Calcium-binding mitochondrial carrier protein Aralar2 OS=Homo sapiens OX=9606 GN=SLC25A13 PE=1 SV=2	NA	0.687468	0.822085	-0.572533	-0.134617	-0.437916	1.26	0.516239	0.870172	0.211857	0.0466365	0.126505	1.30071
Q9UJV9	DDX41	Probable ATP-dependent RNA helicase DDX41 OS=Homo sapiens OX=9606 GN=DDX41 PE=1 SV=2	NA	0.0853088	0.939171	-1.03192	-0.853863	-0.178061	1.11723	0.0175229	0.314526	0.134042	0.102032	0.0141056	0.799154
Q9UJZ1	STOML2	Stomatin-like protein 2, mitochondrial OS=Homo sapiens OX=9606 GN=STOML2 PE=1 SV=1	NA	1.23643	1.22655	-0.835902	0.00987951	-0.845782	2.07234	0.810283	0.821526	0.321706	0.00544609	0.252522	1.47308
Q9UKD2	MRTO4	mRNA turnover protein 4 homolog OS=Homo sapiens OX=9606 GN=MRTO4 PE=1 SV=2	NA	0.609643	1.00906	-0.731358	-0.399416	-0.331942	1.341	0.553118	1.05734	0.191583	0.199094	0.0381978	0.988058
Q9UKM9	RALY	RNA-binding protein Raly OS=Homo sapiens OX=9606 GN=RALY PE=1 SV=1	NA	1.53198	0.947289	-0.0171609	0.584695	-0.601856	1.54915	1.18276	0.649171	0.00407757	0.145077	0.0731214	1.51439
Q9UKY7	CDV3	Protein CDV3 homolog OS=Homo sapiens OX=9606 GN=CDV3 PE=1 SV=1	NA	-2.61113	-2.88043	-2.41493	0.2693	-2.68423	-0.196205	1.83446	2.51666	0.649038	0.0945287	0.757184	0.0630136
Q9ULG1	INO80	Chromatin-remodeling ATPase INO80 OS=Homo sapiens OX=9606 GN=INO80 PE=1 SV=2	NA	0.382997	0.314948	-0.35781	0.068049	-0.425859	0.740808	0.154868	0.161162	0.0465593	0.0154241	0.0461368	0.344178
Q9ULH7	MRTFB	Myocardin-related transcription factor B OS=Homo sapiens OX=9606 GN=MRTFB PE=1 SV=3	NA	-1.28452	-1.91558	0.957967	0.631066	0.326901	-2.24248	1.23773	2.45446	0.37237	0.337476	0.0677251	2.47444
Q9ULV4	CORO1C	Coronin-1C OS=Homo sapiens OX=9606 GN=CORO1C PE=1 SV=1	NA	-0.872568	-1.21318	-0.533637	0.340616	-0.874253	-0.338931	0.756954	1.1928	0.149038	0.22639	0.200535	0.165628
Q9ULW3	ABT1	Activator of basal transcription 1 OS=Homo sapiens OX=9606 GN=ABT1 PE=1 SV=1	NA	1.26967	1.38354	-0.143	-0.113868	-0.0291322	1.41267	1.47269	1.63271	0.0378915	0.0360653	0.00503617	1.63858
Q9ULX3	NOB1	RNA-binding protein NOB1 OS=Homo sapiens OX=9606 GN=NOB1 PE=1 SV=1	NA	NA	NA	-0.861115	0.307748	-1.16886	NA	NA	NA	0.400262	0.199094	0.629787	NA
Q9ULX3	NOB1	RNA-binding protein NOB1 OS=Homo sapiens OX=9606 GN=NOB1 PE=1 SV=1	endonuclease	2.25628	1.94853	NA	NA	NA	3.11739	2.60939	3.00657	NA	NA	NA	3.29171
Q9UM00	TMCO1	Calcium load-activated calcium channel OS=Homo sapiens OX=9606 GN=TMCO1 PE=1 SV=2	NA	1.56189	2.61186	-0.753223	-1.04997	0.296748	2.31511	1.15091	3.53318	0.138568	0.36554	0.037936	2.15563
Q9UM54	MYO6	Unconventional myosin-VI OS=Homo sapiens OX=9606 GN=MYO6 PE=1 SV=4	NA	1.24606	1.93618	-1.1201	-0.690124	-0.429971	2.36615	1.63908	1.96284	0.538364	0.298524	0.0675567	2.79493
Q9UMR2	DDX19B	ATP-dependent RNA helicase DDX19B OS=Homo sapiens OX=9606 GN=DDX19B PE=1 SV=1	NA	1.74124	1.19794	0.23387	0.543305	-0.309435	1.50737	2.2647	1.571	0.0580757	0.36554	0.0560746	1.58781
Q9UMS4	PRPF19	Pre-mRNA-processing factor 19 OS=Homo sapiens OX=9606 GN=PRPF19 PE=1 SV=1	NA	0.564897	0.230478	0.559126	0.334419	0.224707	0.00577138	0.403425	0.18142	0.191031	0.140064	0.0519542	0.0025422
Q9UNE7	STUB1	E3 ubiquitin-protein ligase CHIP OS=Homo sapiens OX=9606 GN=STUB1 PE=1 SV=2	NA	0.687442	0.0122205	1.44211	0.675221	0.766893	-0.754672	0.441282	0.00450198	0.298483	0.400976	0.0677251	0.278316
Q9UNF1	MAGED2	Melanoma-associated antigen D2 OS=Homo sapiens OX=9606 GN=MAGED2 PE=1 SV=2	NA	2.07128	2.47836	-0.48547	-0.407076	-0.0783935	2.55675	2.05612	3.14677	0.149038	0.177034	0.0209788	2.88267
Q9UNL2	SSR3	Translocon-associated protein subunit gamma OS=Homo sapiens OX=9606 GN=SSR3 PE=1 SV=1	NA	-0.425098	0.0312714	0.0353082	-0.45637	0.491678	-0.460407	0.107909	0.00906768	0.00407757	0.0624068	0.0448875	0.166651
Q9UNQ2	DIMT1	Probable dimethyladenosine transferase OS=Homo sapiens OX=9606 GN=DIMT1 PE=1 SV=1	NA	1.35846	2.56458	-0.397305	-1.20612	0.808817	1.75576	1.35815	3.35596	0.0781275	0.663464	0.161848	1.58562
Q9UNX3	RPL26L1	60S ribosomal protein L26-like 1 OS=Homo sapiens OX=9606 GN=RPL26L1 PE=1 SV=1	NA	1.32252	2.10528	-0.922155	-0.782756	-0.139399	2.24468	0.51717	1.10567	0.27238	0.330781	0.0265969	1.21059
Q9UNX4	WDR3	WD repeat-containing protein 3 OS=Homo sapiens OX=9606 GN=WDR3 PE=1 SV=1	NA	0.852783	1.86509	-0.419483	-1.01231	0.592824	1.27227	0.734674	3.05973	0.0872027	0.52346	0.120304	1.21059
Q9UPP1	PHF8	Histone lysine demethylase PHF8 OS=Homo sapiens OX=9606 GN=PHF8 PE=1 SV=3	NA	0.923566	1.63565	-0.27926	-0.712083	0.432823	1.20283	1.2221	2.39813	0.0573886	0.513566	0.0675567	1.02827
Q9UQ35	SRRM2	Serine/arginine repetitive matrix protein 2 OS=Homo sapiens OX=9606 GN=SRRM2 PE=1 SV=2	NA	0.285358	-0.192963	0.0746021	0.478321	-0.403719	0.210756	0.240859	0.0726398	0.0106549	0.115466	0.0366268	0.111518
Q9UQ80	PA2G4	Proliferation-associated protein 2G4 OS=Homo sapiens OX=9606 GN=PA2G4 PE=1 SV=3	NA	1.95243	1.74193	1.04114	0.210504	0.830637	0.911289	2.12411	2.40694	0.478672	0.101131	0.357406	0.934348
Q9UQ84	EXO1	Exonuclease 1 OS=Homo sapiens OX=9606 GN=EXO1 PE=1 SV=2	NA	0.322555	0.353181	-0.24452	-0.0306268	-0.213893	0.567074	0.287133	0.37114	0.0781275	0.0154241	0.0448875	0.500044
Q9UQE7	SMC3	Structural maintenance of chromosomes protein 3 OS=Homo sapiens OX=9606 GN=SMC3 PE=1 SV=2	NA	2.1218	2.19646	1.12547	-0.0746578	1.20013	0.996329	2.42804	2.96235	0.327269	0.0340794	0.297559	0.701177
Q9UQN3	CHMP2B	Charged multivesicular body protein 2b OS=Homo sapiens OX=9606 GN=CHMP2B PE=1 SV=1	NA	-2.99113	-3.26913	-2.56221	0.277999	-2.84021	-0.428915	2.91067	4.04234	0.81468	0.126541	1.01731	0.216996
Q9Y230	RUVBL2	RuvB-like 2 OS=Homo sapiens OX=9606 GN=RUVBL2 PE=1 SV=3	NA	2.2935	1.73431	0.737423	0.559196	0.178226	1.55608	2.73742	2.06311	0.316912	0.316739	0.0265969	1.7356
Q9Y262	EIF3L	Eukaryotic translation initiation factor 3 subunit L OS=Homo sapiens OX=9606 GN=EIF3L PE=1 SV=1	NA	0.599148	0.620258	-0.175859	-0.0211104	-0.154748	0.775006	0.55391	0.580291	0.0382719	0.00747037	0.0243878	0.666477
Q9Y265	RUVBL1	RuvB-like 1 OS=Homo sapiens OX=9606 GN=RUVBL1 PE=1 SV=1	NA	0.766418	-1.54605	1.69295	2.31247	-0.619524	-0.926531	0.529878	1.78835	0.37237	1.07649	0.0675567	0.515744
Q9Y266	NUDC	Nuclear migration protein nudC OS=Homo sapiens OX=9606 GN=NUDC PE=1 SV=1	NA	-1.23066	-3.15788	0.299433	1.92722	-1.62778	-1.5301	0.666895	3.67825	0.0348889	0.628193	0.297559	0.988118
Q9Y277	VDAC3	Voltage-dependent anion-selective channel protein 3 OS=Homo sapiens OX=9606 GN=VDAC3 PE=1 SV=1	NA	2.03522	1.3151	-0.0632982	0.720114	-0.783412	2.09852	2.2647	0.531177	0.00991918	0.126541	0.0645645	2.1501
Q9Y285	FARSA	Phenylalanine--tRNA ligase alpha subunit OS=Homo sapiens OX=9606 GN=FARSA PE=1 SV=3	NA	2.0828	2.27374	-0.494057	-0.190938	-0.303119	2.57686	2.22122	2.89823	0.159974	0.0718329	0.066478	2.84216
Q9Y291	MRPS33	28S ribosomal protein S33, mitochondrial OS=Homo sapiens OX=9606 GN=MRPS33 PE=1 SV=1	NA	0.14886	0.489688	-0.581119	-0.340828	-0.240291	0.72998	0.102641	0.554097	0.246818	0.172889	0.0602307	0.801668
Q9Y295	DRG1	Developmentally-regulated GTP-binding protein 1 OS=Homo sapiens OX=9606 GN=DRG1 PE=1 SV=1	NA	-0.582849	0.799176	-1.47499	-1.38203	-0.0929634	0.89214	0.512028	0.734488	0.41863	0.845109	0.0127368	0.53379
Q9Y2J2	EPB41L3	Band 4.1-like protein 3 OS=Homo sapiens OX=9606 GN=EPB41L3 PE=1 SV=2	NA	-0.427904	-0.136892	-0.354771	-0.291013	-0.0637581	-0.0731337	0.15802	0.128243	0.0428024	0.0553001	0.0146062	0.0472476
Q9Y2L1	DIS3	Exosome complex exonuclease RRP44 OS=Homo sapiens OX=9606 GN=DIS3 PE=1 SV=2	endonuclease	1.26605	3.02951	NA	-1.76345	NA	2.32013	1.59376	3.83032	NA	1.39483	NA	1.75169
Q9Y2L1	DIS3	Exosome complex exonuclease RRP44 OS=Homo sapiens OX=9606 GN=DIS3 PE=1 SV=2	NA	NA	NA	-1.05408	NA	0.709374	NA	NA	NA	0.246818	NA	0.0899111	NA
Q9Y2P8	RCL1	RNA 3'-terminal phosphate cyclase-like protein OS=Homo sapiens OX=9606 GN=RCL1 PE=1 SV=3	NA	-0.0390513	-2.57363	-0.732374	2.53458	-3.26695	0.693323	0.0157572	0.895818	0.314893	0.498047	0.357406	0.42353
Q9Y2R4	DDX52	Probable ATP-dependent RNA helicase DDX52 OS=Homo sapiens OX=9606 GN=DDX52 PE=1 SV=3	NA	1.44977	2.80019	-1.70261	-1.35042	-0.352196	3.15239	1.52747	3.71217	0.81468	0.845109	0.102463	3.29171
Q9Y2W2	WBP11	WW domain-binding protein 11 OS=Homo sapiens OX=9606 GN=WBP11 PE=1 SV=1	NA	-1.94992	-2.58226	-1.12216	0.632343	-1.75451	-0.827755	2.09605	3.29564	0.462482	0.450558	1.01731	0.712178
Q9Y2X3	NOP58	Nucleolar protein 58 OS=Homo sapiens OX=9606 GN=NOP58 PE=1 SV=1	NA	1.1488	2.04972	-0.27392	-0.900918	0.626998	1.42272	1.48954	3.17475	0.0862664	0.663464	0.238681	1.7924
Q9Y324	FCF1	rRNA-processing protein FCF1 homolog OS=Homo sapiens OX=9606 GN=FCF1 PE=2 SV=1	NA	1.86977	2.79222	-1.24224	-0.922453	-0.319791	3.11202	1.39871	3.47462	0.312649	0.360344	0.0612529	2.946
Q9Y388	RBMX2	RNA-binding motif protein, X-linked 2 OS=Homo sapiens OX=9606 GN=RBMX2 PE=1 SV=2	NA	0.432079	0.937882	-1.44504	-0.505803	-0.939238	1.87712	0.143686	0.404113	0.183129	0.0624068	0.066478	0.967486
Q9Y3A2	UTP11	Probable U3 small nucleolar RNA-associated protein 11 OS=Homo sapiens OX=9606 GN=UTP11 PE=1 SV=2	NA	1.35532	1.46618	-0.404563	-0.110861	-0.293702	1.75988	0.797045	1.20195	0.0947977	0.0319197	0.0721191	1.41264
Q9Y3C1	NOP16	Nucleolar protein 16 OS=Homo sapiens OX=9606 GN=NOP16 PE=1 SV=2	NA	-2.38154	0.0978712	-2.87178	-2.47941	-0.392369	0.490241	0.649381	0.0329181	0.376787	0.433147	0.0899111	0.203827
Q9Y3D8	AK6	Adenylate kinase isoenzyme 6 OS=Homo sapiens OX=9606 GN=AK6 PE=1 SV=1	NA	1.27069	0.789406	0.842337	0.481287	0.36105	0.428356	0.664774	0.338452	0.111075	0.123854	0.0254551	0.112847
Q9Y3F4	STRAP	Serine-threonine kinase receptor-associated protein OS=Homo sapiens OX=9606 GN=STRAP PE=1 SV=1	NA	1.71688	0.624459	0.323221	1.09242	-0.769198	1.39366	0.936361	0.642947	0.0382719	0.277103	0.178136	1.56625
Q9Y3T9	NOC2L	Nucleolar complex protein 2 homolog OS=Homo sapiens OX=9606 GN=NOC2L PE=1 SV=4	NA	1.99924	1.99982	0.229102	-0.000588265	0.22969	1.77013	1.6992	2.71328	0.0348889	0.000344455	0.0261385	1.36552
Q9Y3U8	RPL36	60S ribosomal protein L36 OS=Homo sapiens OX=9606 GN=RPL36 PE=1 SV=3	NA	-0.56719	-1.62524	1.24295	1.05805	0.184895	-1.81014	0.302897	1.59562	0.41863	0.574281	0.0369597	1.56969
Q9Y3Y2	CHTOP	Chromatin target of PRMT1 protein OS=Homo sapiens OX=9606 GN=CHTOP PE=1 SV=2	NA	2.20714	2.78654	-0.252249	-0.5794	0.327151	2.45939	1.08999	1.52421	0.0547649	0.322191	0.0633129	1.29924
Q9Y450	HBS1L	HBS1-like protein OS=Homo sapiens OX=9606 GN=HBS1L PE=1 SV=1	NA	0.679332	1.13985	-0.417169	-0.46052	0.0433506	1.0965	0.357008	1.00659	0.0950999	0.156011	0.0127368	0.916057
Q9Y483	MTF2	Metal-response element-binding transcription factor 2 OS=Homo sapiens OX=9606 GN=MTF2 PE=1 SV=3	NA	0.454187	0.0814275	0.553362	0.37276	0.180602	-0.099175	0.170758	0.0301197	0.134042	0.103161	0.0334519	0.0406065
Q9Y4C8	RBM19	Probable RNA-binding protein 19 OS=Homo sapiens OX=9606 GN=RBM19 PE=1 SV=3	NA	2.24557	2.39331	0.335946	-0.147743	0.483688	1.90962	2.51066	3.12763	0.0872027	0.0624068	0.0829232	1.90186
Q9Y4L1	HYOU1	Hypoxia up-regulated protein 1 OS=Homo sapiens OX=9606 GN=HYOU1 PE=1 SV=1	NA	3.58981	-1.61607	-0.11316	5.20587	-5.31903	3.70297	2.92805	0.258665	0.017791	0.612812	0.356416	3.29171
Q9Y4W2	LAS1L	Ribosomal biogenesis protein LAS1L OS=Homo sapiens OX=9606 GN=LAS1L PE=1 SV=2	endonuclease	2.012	2.66308	NA	NA	NA	2.73488	1.99644	3.49601	NA	NA	NA	3.11208
Q9Y4W2	LAS1L	Ribosomal biogenesis protein LAS1L OS=Homo sapiens OX=9606 GN=LAS1L PE=1 SV=2	NA	NA	NA	-0.722883	-0.651086	-0.0717972	NA	NA	NA	0.246818	0.316739	0.0171127	NA
Q9Y520	PRRC2C	Protein PRRC2C OS=Homo sapiens OX=9606 GN=PRRC2C PE=1 SV=4	NA	-1.87362	-2.46753	-0.882988	0.593918	-1.47691	-0.990628	2.15711	3.1544	0.350799	0.360344	0.693869	0.992472
Q9Y5A7	NUB1	NEDD8 ultimate buster 1 OS=Homo sapiens OX=9606 GN=NUB1 PE=1 SV=2	NA	0.89098	0.44715	-0.0680398	0.44383	-0.51187	0.95902	0.724138	0.227491	0.00801317	0.156586	0.0547679	0.534029
Q9Y5A9	YTHDF2	YTH domain-containing family protein 2 OS=Homo sapiens OX=9606 GN=YTHDF2 PE=1 SV=2	NA	-1.5097	-2.02261	-0.410892	0.51291	-0.923802	-1.09881	1.26107	2.3045	0.0781275	0.227168	0.19389	0.749553
Q9Y5B9	SUPT16H	FACT complex subunit SPT16 OS=Homo sapiens OX=9606 GN=SUPT16H PE=1 SV=1	NA	1.37646	1.9174	-0.350211	-0.540941	0.19073	1.72667	1.80859	2.47218	0.0781275	0.316739	0.0254551	1.54072
Q9Y5J1	UTP18	U3 small nucleolar RNA-associated protein 18 homolog OS=Homo sapiens OX=9606 GN=UTP18 PE=1 SV=3	NA	2.49316	2.35596	-0.0783703	0.137194	-0.215565	2.57153	2.27376	2.37187	0.0181919	0.0631207	0.0411206	2.40148
Q9Y5K8	ATP6V1D	V-type proton ATPase subunit D OS=Homo sapiens OX=9606 GN=ATP6V1D PE=1 SV=1	NA	1.07306	0.706092	0.643096	0.366971	0.276125	0.429967	0.586212	0.391952	0.135786	0.0925009	0.0334519	0.205097
Q9Y5M8	SRPRB	Signal recognition particle receptor subunit beta OS=Homo sapiens OX=9606 GN=SRPRB PE=1 SV=3	NA	0.805794	1.1776	-0.330516	-0.371803	0.0412866	1.13631	0.467523	0.878333	0.0872027	0.159778	0.00903387	0.78513
Q9Y5Q8	GTF3C5	General transcription factor 3C polypeptide 5 OS=Homo sapiens OX=9606 GN=GTF3C5 PE=1 SV=2	NA	0.539519	0.923872	-0.968548	-0.384353	-0.584195	1.50807	0.494305	1.14808	0.45424	0.24025	0.179008	1.65531
Q9Y5T5	USP16	Ubiquitin carboxyl-terminal hydrolase 16 OS=Homo sapiens OX=9606 GN=USP16 PE=1 SV=1	NA	1.01457	1.03449	-0.142913	-0.0199239	-0.122989	1.15748	0.854018	0.954324	0.0382719	0.00961999	0.0261385	0.988118
Q9Y613	FHOD1	FH1/FH2 domain-containing protein 1 OS=Homo sapiens OX=9606 GN=FHOD1 PE=1 SV=3	NA	1.06533	0.981109	0.106113	0.0842215	0.0218917	0.959217	0.821182	0.763685	0.0354405	0.0371652	0.00503617	0.719484
Q9Y617	PSAT1	Phosphoserine aminotransferase OS=Homo sapiens OX=9606 GN=PSAT1 PE=1 SV=2	NA	1.2625	-0.0690367	0.0578637	1.33154	-1.27367	1.20464	0.916116	0.0305582	0.00801317	0.663464	0.414717	0.976026
Q9Y678	COPG1	Coatomer subunit gamma-1 OS=Homo sapiens OX=9606 GN=COPG1 PE=1 SV=1	NA	-0.454575	0.569044	-0.876871	-1.02362	0.146747	0.422296	0.153017	0.441209	0.140167	0.227168	0.0228278	0.323332
Q9Y6A4	CFAP20	Cilia- and flagella-associated protein 20 OS=Homo sapiens OX=9606 GN=CFAP20 PE=1 SV=1	NA	-0.0290868	1.45774	-0.513355	-1.48683	0.973477	0.484268	0.0164992	2.12346	0.127728	0.948188	0.233476	0.307161
Q9Y6E2	BZW2	Basic leucine zipper and W2 domain-containing protein 2 OS=Homo sapiens OX=9606 GN=BZW2 PE=1 SV=1	NA	1.04321	1.40899	-0.0921577	-0.365781	0.273623	1.13536	1.26107	2.22908	0.017791	0.227168	0.0510193	1.11428
Q9Y6V7	DDX49	Probable ATP-dependent RNA helicase DDX49 OS=Homo sapiens OX=9606 GN=DDX49 PE=1 SV=1	NA	1.26139	2.25198	-0.686277	-0.990593	0.304316	1.94766	0.612519	1.48279	0.229781	0.513566	0.0675567	1.2446
Streptavidin	NA	(S.avidinii)	NA	-0.23815	-1.2884	1.16561	1.05025	0.115357	-1.40376	0.158995	1.59657	0.555195	0.739623	0.0243878	1.52122

## Sheet: NSP1 inputs
Accession	gene_name	Description	Protein.Function	log2fc_Nsp1-S2/Nsp1-S2-KH164AA	log2fc_Nsp1-S2/Nsp1-S2-RK124AA	log2fc_Nsp1-S2-RK124AA/mock	log2fc_Nsp1-S2-KH164AA/mock	log2fc_Nsp1-S2/mock	log2fc_RK124AA/KH164AA	-log10(pval)_Nsp1-S2/Nsp1-S2-KH164AA	-log10(pval)_Nsp1-S2/Nsp1-S2-RK124AA	-log10(pval)_Nsp1-S2-RK124AA/mock	-log10(pval)_Nsp1-S2-KH164AA/mock	-log10(pval)_Nsp1-S2/mock	-log10(pval)_RK124AA/KH164AA
A0A0B4J2D5	GATD3B	Glutamine amidotransferase-like class 1 domain-containing protein 3B, mitochondrial OS=Homo sapiens OX=9606 GN=GATD3B PE=1 SV=1	NA	-0.0628165	-0.00763606	-0.0166236	0.0385568	-0.0242597	-0.0551804	0.185989	0.0265035	0.0424445	0.00241636	0.0582161	0.24495
A0AVT1	UBA6	Ubiquitin-like modifier-activating enzyme 6 OS=Homo sapiens OX=9606 GN=UBA6 PE=1 SV=1	NA	-0.152033	-0.417565	0.308989	0.043457	-0.108576	0.265532	0.268781	1.30543	0.921976	0.00241636	0.16453	1.12939
A0FGR8	ESYT2	Extended synaptotagmin-2 OS=Homo sapiens OX=9606 GN=ESYT2 PE=1 SV=1	NA	0.151103	-0.0665049	-0.0262323	-0.24384	-0.0927372	0.217608	0.21	0.10511	0.0365688	0.00241636	0.180552	0.41286
A0MZ66	SHTN1	Shootin-1 OS=Homo sapiens OX=9606 GN=SHTN1 PE=1 SV=4	NA	0.180096	-0.00127911	0.0217739	-0.159601	0.0204948	0.181375	0.584457	0.0027098	0.0305413	0.00241636	0.030098	0.550906
A1L0T0	ILVBL	Acetolactate synthase-like protein OS=Homo sapiens OX=9606 GN=ILVBL PE=1 SV=2	NA	-0.00412039	-0.0336484	0.0274235	-0.00210447	-0.00622486	0.029528	0.00556979	0.0988715	0.0651191	0.000822304	0.0122313	0.0798876
A1X283	SH3PXD2B	SH3 and PX domain-containing protein 2B OS=Homo sapiens OX=9606 GN=SH3PXD2B PE=1 SV=3	NA	0.233433	0.106783	0.225742	0.0990927	0.332526	0.126649	0.50694	0.32126	0.44968	0.00241636	0.877896	0.260009
A3KN83	SBNO1	Protein strawberry notch homolog 1 OS=Homo sapiens OX=9606 GN=SBNO1 PE=1 SV=1	NA	-0.161107	-0.19122	0.23497	0.204857	0.0437496	0.0301129	0.242073	0.442184	0.476647	0.00241636	0.0486602	0.0527119
A4D1E9	GTPBP10	GTP-binding protein 10 OS=Homo sapiens OX=9606 GN=GTPBP10 PE=1 SV=1	NA	-0.367583	-0.653973	-0.0940526	-0.380443	-0.748026	0.28639	0.113172	0.278845	0.0343081	0.00241636	0.314586	0.164852
A4D1S0	KLRG2	Killer cell lectin-like receptor subfamily G member 2 OS=Homo sapiens OX=9606 GN=KLRG2 PE=1 SV=3	NA	0.109854	-0.144479	0.151628	-0.102705	0.00714889	0.254332	0.0908849	0.197488	0.135985	0.00241636	0.00593766	0.327649
A5YKK6	CNOT1	CCR4-NOT transcription complex subunit 1 OS=Homo sapiens OX=9606 GN=CNOT1 PE=1 SV=2	NA	0.173814	-0.0234328	-0.0388823	-0.236129	-0.0623151	0.197247	0.304796	0.0311119	0.0651191	0.0214154	0.0999841	0.483257
A6NDG6	PGP	Glycerol-3-phosphate phosphatase OS=Homo sapiens OX=9606 GN=PGP PE=1 SV=1	NA	-0.0871015	-0.253093	0.206673	0.0406819	-0.0464196	0.165991	0.0909823	0.4989	0.631247	0.00241636	0.0420616	0.870199
A6NHR9	SMCHD1	Structural maintenance of chromosomes flexible hinge domain-containing protein 1 OS=Homo sapiens OX=9606 GN=SMCHD1 PE=1 SV=2	NA	-1.39911	-0.94775	-0.461618	-0.0102566	-1.40937	-0.451361	0.83034	0.59826	0.879941	0.000822304	0.950493	0.601906
A6NJ78	METTL15	Probable methyltransferase-like protein 15 OS=Homo sapiens OX=9606 GN=METTL15 PE=1 SV=1	NA	-1.28654	-1.08456	0.819816	1.0218	-0.264745	-0.201984	0.79585	0.733387	0.281624	0.00241636	0.0498663	0.417547
A6NKD9	CCDC85C	Coiled-coil domain-containing protein 85C OS=Homo sapiens OX=9606 GN=CCDC85C PE=1 SV=1	NA	-0.112117	-0.133381	0.0865428	0.0652784	-0.0468384	0.0212644	0.332281	0.28858	0.126892	0.00241636	0.0902614	0.0341955
A8CG34	POM121C	Nuclear envelope pore membrane protein POM 121C OS=Homo sapiens OX=9606 GN=POM121C PE=1 SV=3	NA	-0.603581	-0.120518	-0.259944	0.223119	-0.380462	-0.483063	3.03224	0.258865	0.47512	0.00241636	1.5141	1.22242
A8MXV4	NUDT19	Nucleoside diphosphate-linked moiety X motif 19 OS=Homo sapiens OX=9606 GN=NUDT19 PE=1 SV=1	NA	0.199323	0.158582	0.12471	0.0839692	0.283292	0.0407405	0.557623	0.610415	0.259281	0.00241636	0.713059	0.114169
C9JLW8	MCRIP1	Mapk-regulated corepressor-interacting protein 1 OS=Homo sapiens OX=9606 GN=MCRIP1 PE=1 SV=1	NA	0.222674	0.195891	-0.111353	-0.138136	0.0845385	0.026783	0.456313	0.954244	0.313149	0.00241636	0.274544	0.0433724
E9PRG8	C11orf98	Uncharacterized protein C11orf98 OS=Homo sapiens OX=9606 GN=C11orf98 PE=4 SV=2	NA	0.212647	0.505065	-0.319796	-0.0273785	0.185269	-0.292417	0.414341	1.96771	0.592256	0.000822304	0.339301	0.647106
L0R6Q1	SLC35A4	SLC35A4 upstream open reading frame protein OS=Homo sapiens OX=9606 GN=SLC35A4 PE=3 SV=1	NA	-0.15399	-0.194043	0.175929	0.135876	-0.0181142	0.0400527	0.384845	1.07544	0.695233	0.00241636	0.0375074	0.0957051
L0R819	ASDURF	ASNSD1 upstream open reading frame protein OS=Homo sapiens OX=9606 GN=ASDURF PE=1 SV=1	NA	0.665309	0.133091	0.247847	-0.284371	0.380938	0.532219	0.376808	0.075564	0.0965173	0.00241636	0.216334	0.268533
nsp1-S1	NA	nsp1-S1	NA	0.341635	0.120782	-0.0684852	-0.289339	0.0522966	0.220854	0.467062	0.143781	0.047173	0.00241636	0.0482687	0.223367
nsp1-S2	NA	nsp1-S2	NA	-3.14064	-1.34928	4.57368	6.36504	3.2244	-1.79136	6.02375	3.28423	6.55542	7.73121	5.69574	4.56447
O00116	AGPS	Alkyldihydroxyacetonephosphate synthase, peroxisomal OS=Homo sapiens OX=9606 GN=AGPS PE=1 SV=1	NA	-0.206724	-0.355437	0.180298	0.0315854	-0.175138	0.148713	0.650259	1.52768	0.833136	0.00241636	0.735072	0.545463
O00124	UBXN8	UBX domain-containing protein 8 OS=Homo sapiens OX=9606 GN=UBXN8 PE=1 SV=2	NA	-0.385469	-0.403185	0.285839	0.268123	-0.117346	0.0177163	0.303468	0.382257	0.399271	0.00241636	0.0648911	0.0223493
O00139	KIF2A	Kinesin-like protein KIF2A OS=Homo sapiens OX=9606 GN=KIF2A PE=1 SV=3	NA	-0.240646	-0.257874	0.0542118	0.0369837	-0.203662	0.0172281	0.546099	0.652062	0.0987225	0.00241636	0.385867	0.0441703
O00148	DDX39A	ATP-dependent RNA helicase DDX39A OS=Homo sapiens OX=9606 GN=DDX39A PE=1 SV=2	NA	-0.231998	-0.391223	0.0560523	-0.103173	-0.33517	0.159225	0.528472	1.35876	0.182101	0.00241636	1.21892	0.497543
O00151	PDLIM1	PDZ and LIM domain protein 1 OS=Homo sapiens OX=9606 GN=PDLIM1 PE=1 SV=4	NA	0.225654	0.160161	-0.0950073	-0.1605	0.0651536	0.065493	0.629214	0.616031	0.256546	0.00241636	0.158897	0.158623
O00154	ACOT7	Cytosolic acyl coenzyme A thioester hydrolase OS=Homo sapiens OX=9606 GN=ACOT7 PE=1 SV=3	NA	-0.076459	-0.22411	0.116174	-0.0314763	-0.107935	0.147651	0.187062	1.2129	0.57828	0.00241636	0.47932	0.623872
O00159	MYO1C	Unconventional myosin-Ic OS=Homo sapiens OX=9606 GN=MYO1C PE=1 SV=4	NA	0.109396	0.402415	-0.443401	-0.150381	-0.0409855	-0.29302	0.132441	1.12269	1.69885	0.00241636	0.0622455	0.72061
O00161	SNAP23	Synaptosomal-associated protein 23 OS=Homo sapiens OX=9606 GN=SNAP23 PE=1 SV=1	NA	-0.328425	-0.513747	0.0143347	-0.170987	-0.499412	0.185321	1.21085	2.28882	0.0343081	0.00241636	2.5387	0.632964
O00165	HAX1	HCLS1-associated protein X-1 OS=Homo sapiens OX=9606 GN=HAX1 PE=1 SV=2	NA	-0.0512094	-0.1494	0.110349	0.0121581	-0.0390513	0.0981908	0.105145	0.658789	0.392556	0.000822304	0.117978	0.313115
O00170	AIP	AH receptor-interacting protein OS=Homo sapiens OX=9606 GN=AIP PE=1 SV=2	NA	-0.0149949	-0.249472	0.215895	-0.0185822	-0.033577	0.234477	0.0182446	0.789308	0.570471	0.000822304	0.036413	1.18781
O00178	GTPBP1	GTP-binding protein 1 OS=Homo sapiens OX=9606 GN=GTPBP1 PE=1 SV=3	NA	-0.0872383	-0.280881	0.108791	-0.0848525	-0.172091	0.193643	0.191915	1.00634	0.288009	0.00241636	0.479668	0.806089
O00186	STXBP3	Syntaxin-binding protein 3 OS=Homo sapiens OX=9606 GN=STXBP3 PE=1 SV=2	NA	-0.266439	-0.497736	0.14665	-0.0846471	-0.351087	0.231297	0.612117	1.56555	0.416641	0.00241636	0.981976	0.783279
O00193	SMAP	Small acidic protein OS=Homo sapiens OX=9606 GN=SMAP PE=1 SV=1	NA	0.245331	0.183019	-0.0710148	-0.133327	0.112004	0.0623118	0.649124	0.456927	0.124798	0.00241636	0.236255	0.12702
O00203	AP3B1	AP-3 complex subunit beta-1 OS=Homo sapiens OX=9606 GN=AP3B1 PE=1 SV=3	NA	-0.302674	-0.228444	-0.0692926	0.0049377	-0.297736	-0.0742303	0.913904	0.606198	0.127316	0.000822304	0.998818	0.157972
O00217	NDUFS8	NADH dehydrogenase [ubiquinone] iron-sulfur protein 8, mitochondrial OS=Homo sapiens OX=9606 GN=NDUFS8 PE=1 SV=1	NA	-0.10969	-0.176428	-0.133257	-0.199996	-0.309686	0.0667381	0.184537	0.79277	0.622577	0.00241636	1.6249	0.151275
O00231	PSMD11	26S proteasome non-ATPase regulatory subunit 11 OS=Homo sapiens OX=9606 GN=PSMD11 PE=1 SV=3	NA	-0.0372546	-0.207097	0.073862	-0.0959806	-0.133235	0.169843	0.0617673	0.799444	0.230665	0.00241636	0.422303	0.632209
O00232	PSMD12	26S proteasome non-ATPase regulatory subunit 12 OS=Homo sapiens OX=9606 GN=PSMD12 PE=1 SV=3	NA	-0.0125676	-0.164638	0.0627443	-0.0893257	-0.101893	0.15207	0.0213011	0.836503	0.206472	0.00241636	0.372774	0.635692
O00233	PSMD9	26S proteasome non-ATPase regulatory subunit 9 OS=Homo sapiens OX=9606 GN=PSMD9 PE=1 SV=3	NA	0.0042497	-0.147006	0.33979	0.188535	0.192785	0.151255	0.00429865	0.427419	1.54424	0.00241636	0.469336	0.632964
O00244	ATOX1	Copper transport protein ATOX1 OS=Homo sapiens OX=9606 GN=ATOX1 PE=1 SV=1	NA	0.12252	-0.0558141	-0.0826702	-0.261004	-0.138484	0.178334	0.354548	0.113016	0.142025	0.0214154	0.35368	0.505847
O00255	MEN1	Menin OS=Homo sapiens OX=9606 GN=MEN1 PE=1 SV=4	NA	-1.54602	-0.403212	-1.21307	-0.0702633	-1.61628	-1.14281	3.80461	0.513157	1.77026	0.00241636	3.99691	1.65879
O00264	PGRMC1	Membrane-associated progesterone receptor component 1 OS=Homo sapiens OX=9606 GN=PGRMC1 PE=1 SV=3	NA	-0.134048	-0.179344	0.0519895	0.00669273	-0.127355	0.0452968	0.476219	1.17672	0.247151	0.000822304	0.75937	0.159209
O00267	SUPT5H	Transcription elongation factor SPT5 OS=Homo sapiens OX=9606 GN=SUPT5H PE=1 SV=1	NA	-0.327392	0.0156555	-0.407074	-0.0640258	-0.391418	-0.343048	0.844788	0.025978	1.36923	0.00241636	1.49891	0.911921
O00268	TAF4	Transcription initiation factor TFIID subunit 4 OS=Homo sapiens OX=9606 GN=TAF4 PE=1 SV=2	NA	-0.92581	-0.671929	-0.126968	0.126914	-0.798896	-0.253882	1.0617	0.623662	0.0843114	0.00241636	0.885683	0.23192
O00273	DFFA	DNA fragmentation factor subunit alpha OS=Homo sapiens OX=9606 GN=DFFA PE=1 SV=1	NA	-0.0154551	-0.13334	0.0121069	-0.105778	-0.121233	0.117885	0.0189752	0.33714	0.0190508	0.00241636	0.327794	0.284759
O00291	HIP1	Huntingtin-interacting protein 1 OS=Homo sapiens OX=9606 GN=HIP1 PE=1 SV=5	NA	-0.384916	-0.323951	7.51544e-05	0.0610402	-0.323876	-0.0609651	0.829832	0.597665	0.000113473	0.00136168	0.396869	0.0989484
O00299	CLIC1	Chloride intracellular channel protein 1 OS=Homo sapiens OX=9606 GN=CLIC1 PE=1 SV=4	NA	0.0431666	-0.170404	0.312092	0.0985208	0.141687	0.213571	0.0690511	1.01137	1.65083	0.00241636	0.646316	0.699543
O00303	EIF3F	Eukaryotic translation initiation factor 3 subunit F OS=Homo sapiens OX=9606 GN=EIF3F PE=1 SV=1	NA	0.116217	-0.169315	0.214765	-0.0707669	0.0454498	0.285532	0.16582	0.527962	0.807661	0.00241636	0.0803852	0.792575
O00330	PDHX	Pyruvate dehydrogenase protein X component, mitochondrial OS=Homo sapiens OX=9606 GN=PDHX PE=1 SV=3	NA	0.114201	0.145962	-0.0362385	-0.00447779	0.109723	-0.0317607	0.228845	0.397876	0.0473863	0.000822304	0.268776	0.0516083
O00399	DCTN6	Dynactin subunit 6 OS=Homo sapiens OX=9606 GN=DCTN6 PE=1 SV=1	NA	0.126031	0.0124028	0.182341	0.0687129	0.194744	0.113628	0.296607	0.0265035	0.292726	0.00241636	0.356856	0.291023
O00401	WASL	Neural Wiskott-Aldrich syndrome protein OS=Homo sapiens OX=9606 GN=WASL PE=1 SV=2	NA	0.928156	0.549755	0.0944034	-0.283998	0.644159	0.378401	0.440827	0.388559	0.0231432	0.00241636	0.276451	0.139785
O00410	IPO5	Importin-5 OS=Homo sapiens OX=9606 GN=IPO5 PE=1 SV=4	NA	-0.0712635	-0.319834	0.233116	-0.0154549	-0.0867183	0.248571	0.099516	1.15289	0.794455	0.000822304	0.163767	0.849566
O00411	POLRMT	DNA-directed RNA polymerase, mitochondrial OS=Homo sapiens OX=9606 GN=POLRMT PE=1 SV=2	NA	-0.764887	-0.292882	-0.319625	0.15238	-0.612507	-0.472004	0.553378	0.20711	0.35371	0.00241636	0.462081	0.58406
O00422	SAP18	Histone deacetylase complex subunit SAP18 OS=Homo sapiens OX=9606 GN=SAP18 PE=1 SV=1	NA	-0.990065	0.0869206	-0.947678	0.129307	-0.860758	-1.07699	4.09726	0.228734	2.98759	0.00241636	4.37071	3.09055
O00425	IGF2BP3	Insulin-like growth factor 2 mRNA-binding protein 3 OS=Homo sapiens OX=9606 GN=IGF2BP3 PE=1 SV=2	NA	0.0704641	-0.112505	0.145923	-0.0370459	0.0334182	0.182969	0.171727	0.656154	0.833136	0.00241636	0.10927	0.820732
O00429	DNM1L	Dynamin-1-like protein OS=Homo sapiens OX=9606 GN=DNM1L PE=1 SV=2	NA	-0.0319675	-0.182585	0.108043	-0.042575	-0.0745425	0.150618	0.0587643	0.71374	0.437822	0.00241636	0.179158	0.814287
O00442	RTCA	RNA 3'-terminal phosphate cyclase OS=Homo sapiens OX=9606 GN=RTCA PE=1 SV=1	NA	-0.139906	-0.235109	0.10096	0.00575676	-0.134149	0.0952031	0.403474	1.03774	0.265512	0.000822304	0.482425	0.26201
O00461	GOLIM4	Golgi integral membrane protein 4 OS=Homo sapiens OX=9606 GN=GOLIM4 PE=1 SV=1	NA	-0.00462898	-0.168568	0.0973001	-0.066639	-0.071268	0.163939	0.00463182	0.278204	0.102819	0.00241636	0.0808938	0.272958
O00469	PLOD2	Procollagen-lysine,2-oxoglutarate 5-dioxygenase 2 OS=Homo sapiens OX=9606 GN=PLOD2 PE=1 SV=2	NA	-0.0387262	-0.133796	0.144251	0.0491817	0.0104555	0.0950697	0.0364632	0.270905	0.2543	0.00136168	0.0117306	0.158458
O00470	MEIS1	Homeobox protein Meis1 OS=Homo sapiens OX=9606 GN=MEIS1 PE=1 SV=1	NA	0.261157	0.433304	-0.567263	-0.395115	-0.133959	-0.172148	0.28961	0.253625	0.292726	0.00241636	0.17502	0.0807407
O00479	HMGN4	High mobility group nucleosome-binding domain-containing protein 4 OS=Homo sapiens OX=9606 GN=HMGN4 PE=1 SV=3	NA	-2.82867	-1.02992	-1.60614	0.192614	-2.63606	-1.79875	1.50285	0.389336	1.16368	0.00241636	1.43607	1.29793
O00483	NDUFA4	Cytochrome c oxidase subunit NDUFA4 OS=Homo sapiens OX=9606 GN=NDUFA4 PE=1 SV=1	NA	-0.24617	-0.330461	-0.111616	-0.195906	-0.442076	0.0842906	0.313087	0.648287	0.180856	0.00241636	1.12094	0.111408
O00487	PSMD14	26S proteasome non-ATPase regulatory subunit 14 OS=Homo sapiens OX=9606 GN=PSMD14 PE=1 SV=1	NA	-0.126722	-0.427122	0.149286	-0.151115	-0.277837	0.3004	0.145062	0.977288	0.268002	0.00241636	0.438453	0.855338
O00488	ZNF593	Zinc finger protein 593 OS=Homo sapiens OX=9606 GN=ZNF593 PE=1 SV=2	NA	-0.461884	-0.251511	-0.45433	-0.243957	-0.705841	-0.210373	1.18622	0.568113	0.632897	0.00241636	1.12443	0.621126
O00499	BIN1	Myc box-dependent-interacting protein 1 OS=Homo sapiens OX=9606 GN=BIN1 PE=1 SV=1	NA	0.040606	-0.0638379	0.0662434	-0.0382005	0.00240554	0.104444	0.0320534	0.105233	0.103943	0.00103347	0.0020845	0.16161
O00505	KPNA3	Importin subunit alpha-4 OS=Homo sapiens OX=9606 GN=KPNA3 PE=1 SV=2	NA	-0.0425458	-0.173846	0.137343	0.00604297	-0.0365028	0.1313	0.0562381	0.886312	0.376265	0.000822304	0.0608062	0.3293
O00541	PES1	Pescadillo homolog OS=Homo sapiens OX=9606 GN=PES1 PE=1 SV=1	NA	-0.414993	-0.205043	-0.239082	-0.0291323	-0.444125	-0.20995	1.41049	0.822689	0.767645	0.00103347	2.32087	0.541751
O00560	SDCBP	Syntenin-1 OS=Homo sapiens OX=9606 GN=SDCBP PE=1 SV=1	NA	-0.752793	-0.794858	0.0506394	0.00857484	-0.744219	0.0420645	1.45439	1.84698	0.105419	0.000822304	2.02619	0.0577288
O00566	MPHOSPH10	U3 small nucleolar ribonucleoprotein protein MPP10 OS=Homo sapiens OX=9606 GN=MPHOSPH10 PE=1 SV=2	NA	-0.461746	1.10395	-1.41731	0.148393	-0.313353	-1.5657	0.634798	1.43323	1.57841	0.00241636	0.236801	2.54408
O00567	NOP56	Nucleolar protein 56 OS=Homo sapiens OX=9606 GN=NOP56 PE=1 SV=4	NA	-2.55852	0.0458303	-2.50319	0.101158	-2.45736	-2.60435	4.65933	0.0849217	4.30061	0.00241636	4.30497	5.07189
O00571	DDX3X	ATP-dependent RNA helicase DDX3X OS=Homo sapiens OX=9606 GN=DDX3X PE=1 SV=3	NA	-1.17909	-0.562439	-0.590692	0.0259619	-1.15313	-0.616654	3.99637	2.23836	1.77026	0.00103347	3.82531	1.942
O00584	RNASET2	Ribonuclease T2 OS=Homo sapiens OX=9606 GN=RNASET2 PE=1 SV=2	NA	-0.355998	-0.830761	0.160011	-0.314752	-0.67075	0.474763	0.63213	1.83784	0.57284	0.0214154	1.74521	1.53506
O00625	PIR	Pirin OS=Homo sapiens OX=9606 GN=PIR PE=1 SV=1	NA	0.189514	-0.158516	0.0709601	-0.277071	-0.087556	0.348031	0.393584	0.421331	0.172382	0.0214154	0.20531	0.970836
O00629	KPNA4	Importin subunit alpha-3 OS=Homo sapiens OX=9606 GN=KPNA4 PE=1 SV=1	NA	0.0265101	-0.000597006	0.0444346	0.0173275	0.0438376	0.0271071	0.018975	0.000593362	0.0519458	0.000822304	0.0409343	0.035853
O00746	NME4	Nucleoside diphosphate kinase, mitochondrial OS=Homo sapiens OX=9606 GN=NME4 PE=1 SV=1	NA	-0.132665	-0.626063	0.426416	-0.0669818	-0.199647	0.493397	0.201612	1.40682	0.513303	0.00136168	0.198928	1.19783
O00762	UBE2C	Ubiquitin-conjugating enzyme E2 C OS=Homo sapiens OX=9606 GN=UBE2C PE=1 SV=1	NA	-0.109552	-0.430011	0.291394	-0.0290644	-0.138617	0.320458	0.146358	1.35394	1.0478	0.00103347	0.370027	0.799616
O00764	PDXK	Pyridoxal kinase OS=Homo sapiens OX=9606 GN=PDXK PE=1 SV=1	NA	0.143363	-0.0891779	0.126315	-0.106225	0.0371375	0.232541	0.271298	0.19737	0.236808	0.00241636	0.0535649	0.575108
O00767	SCD	Acyl-CoA desaturase OS=Homo sapiens OX=9606 GN=SCD PE=1 SV=2	NA	-0.490602	-0.278033	-0.0860687	0.1265	-0.364102	-0.212568	0.950543	0.225557	0.0427048	0.00241636	0.688516	0.157925
O14497	ARID1A	AT-rich interactive domain-containing protein 1A OS=Homo sapiens OX=9606 GN=ARID1A PE=1 SV=3	NA	-1.14041	-0.230739	-0.91452	-0.00485201	-1.14526	-0.909668	4.22637	0.924123	2.87089	0.000822304	3.9093	3.08913
O14519	CDK2AP1	Cyclin-dependent kinase 2-associated protein 1 OS=Homo sapiens OX=9606 GN=CDK2AP1 PE=1 SV=1	NA	-0.226783	0.0879971	-0.137959	0.176821	-0.0499619	-0.31478	0.275072	0.12446	0.376265	0.00241636	0.0425532	1.12618
O14530	TXNDC9	Thioredoxin domain-containing protein 9 OS=Homo sapiens OX=9606 GN=TXNDC9 PE=1 SV=2	NA	0.0427641	-0.0963478	0.0383599	-0.100752	-0.057988	0.139112	0.0774563	0.171547	0.0386126	0.00241636	0.0811917	0.262868
O14531	DPYSL4	Dihydropyrimidinase-related protein 4 OS=Homo sapiens OX=9606 GN=DPYSL4 PE=1 SV=2	NA	0.257582	-0.355475	0.635064	0.022007	0.279589	0.613057	0.221336	0.350829	0.495638	0.000822304	0.195023	0.717884
O14545	TRAFD1	TRAF-type zinc finger domain-containing protein 1 OS=Homo sapiens OX=9606 GN=TRAFD1 PE=1 SV=1	NA	0.178268	0.0994417	0.0932658	0.0144396	0.192708	0.0788262	0.16897	0.120492	0.121461	0.000822304	0.236255	0.105098
O14548	COX7A2L	Cytochrome c oxidase subunit 7A-related protein, mitochondrial OS=Homo sapiens OX=9606 GN=COX7A2L PE=1 SV=2	NA	-0.432198	-0.343492	-0.287843	-0.199137	-0.631335	-0.0887063	0.545535	0.515283	0.360398	0.00241636	0.877896	0.119482
O14562	UBFD1	Ubiquitin domain-containing protein UBFD1 OS=Homo sapiens OX=9606 GN=UBFD1 PE=1 SV=2	NA	-0.0445295	0.22027	-0.147983	0.116816	0.072287	-0.2648	0.0392804	0.216754	0.110979	0.00241636	0.0744176	0.259959
O14579	COPE	Coatomer subunit epsilon OS=Homo sapiens OX=9606 GN=COPE PE=1 SV=3	NA	-0.328019	-0.40087	0.0602786	-0.012573	-0.340592	0.0728516	0.819118	1.2129	0.149782	0.000822304	0.969857	0.198567
O14617	AP3D1	AP-3 complex subunit delta-1 OS=Homo sapiens OX=9606 GN=AP3D1 PE=1 SV=1	NA	-0.0802514	-0.0608435	0.094997	0.114405	0.0341536	-0.0194079	0.220738	0.261831	0.228992	0.00241636	0.0582161	0.0622122
O14618	CCS	Copper chaperone for superoxide dismutase OS=Homo sapiens OX=9606 GN=CCS PE=1 SV=1	NA	0.0670662	-0.268063	0.401039	0.0659097	0.132976	0.335129	0.0485075	0.383948	0.440427	0.00103347	0.114893	0.427142
O14639	ABLIM1	Actin-binding LIM protein 1 OS=Homo sapiens OX=9606 GN=ABLIM1 PE=1 SV=3	NA	-0.485479	-0.283093	0.125095	0.327481	-0.157999	-0.202386	0.393266	0.263955	0.167212	0.00241636	0.12231	0.227615
O14641	DVL2	Segment polarity protein dishevelled homolog DVL-2 OS=Homo sapiens OX=9606 GN=DVL2 PE=1 SV=1	NA	0.0203633	-0.0364811	0.593545	0.5367	0.557064	0.0568444	0.0128013	0.0311119	0.556533	0.00241636	0.470274	0.0824051
O14646	CHD1	Chromodomain-helicase-DNA-binding protein 1 OS=Homo sapiens OX=9606 GN=CHD1 PE=1 SV=2	NA	-0.830867	-0.377238	-0.585787	-0.132157	-0.963025	-0.45363	2.49426	1.03762	2.5162	0.00241636	2.95419	1.80388
O14653	GOSR2	Golgi SNAP receptor complex member 2 OS=Homo sapiens OX=9606 GN=GOSR2 PE=1 SV=2	NA	0.110856	-0.0229107	-0.0794229	-0.213189	-0.102334	0.133766	0.139912	0.038987	0.209891	0.00241636	0.228591	0.275649
O14654	IRS4	Insulin receptor substrate 4 OS=Homo sapiens OX=9606 GN=IRS4 PE=1 SV=1	NA	-0.00838691	0.0773176	-0.144476	-0.0587711	-0.0671581	-0.0857045	0.0164891	0.418019	0.712713	0.00241636	0.252529	0.387237
O14672	ADAM10	Disintegrin and metalloproteinase domain-containing protein 10 OS=Homo sapiens OX=9606 GN=ADAM10 PE=1 SV=1	NA	-0.492343	-0.354354	1.30412	1.44211	0.949763	-0.137989	0.0833902	0.0813738	0.693931	0.0214154	0.208077	0.0639164
O14681	EI24	Etoposide-induced protein 2.4 homolog OS=Homo sapiens OX=9606 GN=EI24 PE=1 SV=4	NA	0.00772153	0.0603202	-0.0284246	0.0241741	0.0318956	-0.0525987	0.00726364	0.0985322	0.0602301	0.00103347	0.0338456	0.18621
O14733	MAP2K7	Dual specificity mitogen-activated protein kinase kinase 7 OS=Homo sapiens OX=9606 GN=MAP2K7 PE=1 SV=2	NA	-0.108814	-0.337203	0.165009	-0.0633806	-0.172194	0.228389	0.15666	1.17672	0.613077	0.00241636	0.396465	0.77302
O14737	PDCD5	Programmed cell death protein 5 OS=Homo sapiens OX=9606 GN=PDCD5 PE=1 SV=3	NA	0.102662	0.014873	0.0293599	-0.0584289	0.0442328	0.0877888	0.385045	0.0359653	0.0516901	0.00241636	0.100834	0.288772
O14744	PRMT5	Protein arginine N-methyltransferase 5 OS=Homo sapiens OX=9606 GN=PRMT5 PE=1 SV=4	NA	0.179637	0.052112	0.0609662	-0.0665591	0.113078	0.127525	0.408818	0.118149	0.117623	0.00241636	0.188363	0.458887
O14745	SLC9A3R1	Na(+)/H(+) exchange regulatory cofactor NHE-RF1 OS=Homo sapiens OX=9606 GN=SLC9A3R1 PE=1 SV=4	NA	0.0823929	0.0131795	0.0744292	0.00521589	0.0876088	0.0692133	0.242073	0.0353409	0.237244	0.000822304	0.267083	0.28673
O14757	CHEK1	Serine/threonine-protein kinase Chk1 OS=Homo sapiens OX=9606 GN=CHEK1 PE=1 SV=2	NA	0.0035094	-0.0317533	0.0743112	0.0390485	0.0425579	0.0352627	0.00298522	0.0493694	0.106481	0.00103347	0.0765927	0.0498529
O14773	TPP1	Tripeptidyl-peptidase 1 OS=Homo sapiens OX=9606 GN=TPP1 PE=1 SV=2	NA	-0.195569	-0.403576	0.154811	-0.0531959	-0.248765	0.208007	0.238813	0.907007	0.267543	0.0018214	0.515114	0.339989
O14776	TCERG1	Transcription elongation regulator 1 OS=Homo sapiens OX=9606 GN=TCERG1 PE=1 SV=2	NA	-0.130086	-0.150043	-0.0276026	-0.0475597	-0.177645	0.0199571	0.463518	0.884163	0.102855	0.00241636	1.03037	0.064463
O14777	NDC80	Kinetochore protein NDC80 homolog OS=Homo sapiens OX=9606 GN=NDC80 PE=1 SV=1	NA	-0.160325	-0.383262	0.192737	-0.0301996	-0.190524	0.222937	0.43524	1.35648	0.500881	0.00103347	0.803966	0.596662
O14802	POLR3A	DNA-directed RNA polymerase III subunit RPC1 OS=Homo sapiens OX=9606 GN=POLR3A PE=1 SV=2	defense response to virus	-0.0699383	-0.0833392	0.0739034	0.0605025	-0.00943581	0.0134009	0.0786155	0.170614	0.0972198	0.00224569	0.00914211	0.0270018
O14810	CPLX1	Complexin-1 OS=Homo sapiens OX=9606 GN=CPLX1 PE=1 SV=1	NA	-0.12753	-0.28207	-0.062395	-0.216935	-0.344465	0.15454	0.16579	0.603265	0.0889888	0.00241636	0.66472	0.361851
O14818	PSMA7	Proteasome subunit alpha type-7 OS=Homo sapiens OX=9606 GN=PSMA7 PE=1 SV=1	NA	0.0634835	-0.164897	0.120034	-0.108347	-0.0448634	0.228381	0.130046	0.743896	0.470179	0.00241636	0.0931726	1.17977
O14828	SCAMP3	Secretory carrier-associated membrane protein 3 OS=Homo sapiens OX=9606 GN=SCAMP3 PE=1 SV=3	NA	0.0151582	-0.0346335	0.0918176	0.0420259	0.0571841	0.0497917	0.0239186	0.14862	0.281046	0.00241636	0.154495	0.14626
O14893	GEMIN2	Gem-associated protein 2 OS=Homo sapiens OX=9606 GN=GEMIN2 PE=1 SV=1	NA	0.110439	0.081436	0.0539206	0.0249177	0.135357	0.0290029	0.199578	0.114477	0.0466153	0.000822304	0.195569	0.0370034
O14908	GIPC1	PDZ domain-containing protein GIPC1 OS=Homo sapiens OX=9606 GN=GIPC1 PE=1 SV=2	NA	-0.0354431	-0.191126	0.248564	0.0928807	0.0574376	0.155683	0.0322946	0.268938	0.330816	0.00241636	0.0634971	0.211102
O14910	LIN7A	Protein lin-7 homolog A OS=Homo sapiens OX=9606 GN=LIN7A PE=1 SV=2	NA	-0.130483	-0.207178	0.175542	0.0988469	-0.0316356	0.0766956	0.221689	0.413538	0.298291	0.00241636	0.0363764	0.148204
O14925	TIMM23	Mitochondrial import inner membrane translocase subunit Tim23 OS=Homo sapiens OX=9606 GN=TIMM23 PE=1 SV=1	NA	-0.606369	-0.737934	0.0947578	-0.0368073	-0.643176	0.131565	0.654443	1.99316	0.224772	0.000822304	2.08002	0.121557
O14929	HAT1	Histone acetyltransferase type B catalytic subunit OS=Homo sapiens OX=9606 GN=HAT1 PE=1 SV=1	NA	-0.0707688	-0.297988	0.228491	0.00127277	-0.069496	0.227219	0.103196	0.962273	0.513303	0.000822304	0.0947889	0.754032
O14949	UQCRQ	Cytochrome b-c1 complex subunit 8 OS=Homo sapiens OX=9606 GN=UQCRQ PE=1 SV=4	NA	-0.447034	0.28785	-2.34377	-1.60889	-2.05592	-0.734884	0.0659666	0.0618832	0.773496	0.00241636	0.716616	0.172528
O14950	MYL12B	Myosin regulatory light chain 12B OS=Homo sapiens OX=9606 GN=MYL12B PE=1 SV=2	NA	-1.37549	-1.20805	-0.189657	-0.0222161	-1.39771	-0.167441	1.60628	1.34665	0.761358	0.00103347	1.70783	0.482138
O14964	HGS	Hepatocyte growth factor-regulated tyrosine kinase substrate OS=Homo sapiens OX=9606 GN=HGS PE=1 SV=1	NA	0.18515	-0.0433256	0.175871	-0.0526042	0.132545	0.228475	0.599647	0.115194	0.444087	0.00241636	0.338225	0.798882
O14965	AURKA	Aurora kinase A OS=Homo sapiens OX=9606 GN=AURKA PE=1 SV=2	NA	-0.271981	-0.346708	-0.314701	-0.389427	-0.661409	0.0747268	0.435808	0.350004	0.267543	0.0214154	1.74521	0.0571197
O14974	PPP1R12A	Protein phosphatase 1 regulatory subunit 12A OS=Homo sapiens OX=9606 GN=PPP1R12A PE=1 SV=1	NA	-0.116498	-0.17842	0.0386808	-0.0232409	-0.139739	0.0619217	0.242366	0.798733	0.103628	0.00103347	0.503447	0.157925
O14976	GAK	Cyclin-G-associated kinase OS=Homo sapiens OX=9606 GN=GAK PE=1 SV=2	NA	0.134789	0.0997378	0.0770115	0.0419601	0.176749	0.0350514	0.398903	0.318902	0.174986	0.00241636	0.513278	0.0966287
O14979	HNRNPDL	Heterogeneous nuclear ribonucleoprotein D-like OS=Homo sapiens OX=9606 GN=HNRNPDL PE=1 SV=3	NA	-0.493482	0.131545	-0.534545	0.090482	-0.403	-0.625027	2.6187	0.542584	2.00153	0.00241636	1.87895	2.59693
O14980	XPO1	Exportin-1 OS=Homo sapiens OX=9606 GN=XPO1 PE=1 SV=1	NA	-0.100127	-0.252162	0.0781297	-0.0739061	-0.174033	0.152036	0.190527	0.945602	0.194081	0.00241636	0.488231	0.488424
O15020	SPTBN2	Spectrin beta chain, non-erythrocytic 2 OS=Homo sapiens OX=9606 GN=SPTBN2 PE=1 SV=3	NA	-0.21325	-0.491734	-0.0517993	-0.330283	-0.543533	0.278484	0.308574	1.04052	0.0864549	0.0214154	1.27084	0.721376
O15027	SEC16A	Protein transport protein Sec16A OS=Homo sapiens OX=9606 GN=SEC16A PE=1 SV=4	NA	0.272436	-0.0111335	0.0668256	-0.216744	0.0556921	0.28357	1.06171	0.0402535	0.309231	0.0214154	0.224108	1.12893
O15042	U2SURP	U2 snRNP-associated SURP motif-containing protein OS=Homo sapiens OX=9606 GN=U2SURP PE=1 SV=2	NA	0.0362315	-0.0853764	0.0442145	-0.0773935	-0.0411619	0.121608	0.0428441	0.163262	0.0889888	0.00241636	0.0634971	0.280336
O15047	SETD1A	Histone-lysine N-methyltransferase SETD1A OS=Homo sapiens OX=9606 GN=SETD1A PE=1 SV=3	NA	0.0483585	0.0610836	-0.114152	-0.101427	-0.0530686	-0.0127251	0.054802	0.108142	0.244679	0.00241636	0.0740484	0.0197991
O15067	PFAS	Phosphoribosylformylglycinamidine synthase OS=Homo sapiens OX=9606 GN=PFAS PE=1 SV=4	NA	0.00421401	-0.0818915	0.154458	0.0683521	0.0725661	0.0861055	0.00556979	0.268607	0.744254	0.00241636	0.173207	0.340466
O15116	LSM1	U6 snRNA-associated Sm-like protein LSm1 OS=Homo sapiens OX=9606 GN=LSM1 PE=1 SV=1	NA	0.107697	0.0299637	-0.021266	-0.0989989	0.00869772	0.0777329	0.122615	0.0765321	0.063437	0.00241636	0.0180342	0.129576
O15118	NPC1	NPC intracellular cholesterol transporter 1 OS=Homo sapiens OX=9606 GN=NPC1 PE=1 SV=2	NA	-0.176423	-0.375361	0.113754	-0.0851844	-0.261607	0.198938	0.0849624	0.31272	0.190113	0.00241636	0.159149	0.447766
O15126	SCAMP1	Secretory carrier-associated membrane protein 1 OS=Homo sapiens OX=9606 GN=SCAMP1 PE=1 SV=2	NA	0.0580148	-0.0407492	0.0292186	-0.0695454	-0.0115307	0.098764	0.0595997	0.101884	0.0506645	0.00241636	0.0259477	0.147815
O15127	SCAMP2	Secretory carrier-associated membrane protein 2 OS=Homo sapiens OX=9606 GN=SCAMP2 PE=1 SV=2	NA	0.0800739	-0.130784	-0.0832586	-0.294116	-0.214043	0.210858	0.054519	0.126021	0.0674904	0.00241636	0.227235	0.22749
O15143	ARPC1B	Actin-related protein 2/3 complex subunit 1B OS=Homo sapiens OX=9606 GN=ARPC1B PE=1 SV=3	NA	-0.175052	-0.39769	0.0658276	-0.15681	-0.331862	0.222638	0.268811	1.10667	0.124798	0.00241636	1.11502	0.455529
O15144	ARPC2	Actin-related protein 2/3 complex subunit 2 OS=Homo sapiens OX=9606 GN=ARPC2 PE=1 SV=1	NA	-0.21409	-0.488705	0.203856	-0.0707583	-0.284848	0.274615	0.345147	1.28156	0.449654	0.00241636	0.558609	0.739336
O15145	ARPC3	Actin-related protein 2/3 complex subunit 3 OS=Homo sapiens OX=9606 GN=ARPC3 PE=1 SV=3	NA	-0.0428204	-0.145736	0.0558473	-0.0470684	-0.0898888	0.102916	0.0846988	0.606836	0.131823	0.00241636	0.269767	0.306373
O15160	POLR1C	DNA-directed RNA polymerases I and III subunit RPAC1 OS=Homo sapiens OX=9606 GN=POLR1C PE=1 SV=1	NA	-0.124319	-0.138424	-0.0858758	-0.0999807	-0.2243	0.0141048	0.363811	0.585226	0.215772	0.00241636	0.705509	0.0426075
O15164	TRIM24	Transcription intermediary factor 1-alpha OS=Homo sapiens OX=9606 GN=TRIM24 PE=1 SV=3	NA	0.378089	-0.219589	0.515251	-0.0824272	0.295662	0.597678	0.404257	0.562777	1.16153	0.00219234	0.689839	0.808588
O15173	PGRMC2	Membrane-associated progesterone receptor component 2 OS=Homo sapiens OX=9606 GN=PGRMC2 PE=1 SV=1	NA	0.0651465	-0.0553492	-0.0471421	-0.167638	-0.102491	0.120496	0.133438	0.225557	0.123454	0.00241636	0.273955	0.462184
O15212	PFDN6	Prefoldin subunit 6 OS=Homo sapiens OX=9606 GN=PFDN6 PE=1 SV=1	NA	0.157599	-0.00661853	0.0997964	-0.0644212	0.0931779	0.164218	0.620246	0.0148001	0.301528	0.00241636	0.260052	0.797831
O15226	NKRF	NF-kappa-B-repressing factor OS=Homo sapiens OX=9606 GN=NKRF PE=1 SV=2	NA	0.183123	0.553398	-0.38055	-0.0102759	0.172847	-0.370275	0.165611	1.25045	0.696005	0.000822304	0.222292	0.59612
O15234	CASC3	Protein CASC3 OS=Homo sapiens OX=9606 GN=CASC3 PE=1 SV=2	NA	0.171485	0.00522396	-0.0491848	-0.215445	-0.0439608	0.166261	0.481674	0.00885266	0.131171	0.0214154	0.0770068	0.758594
O15235	MRPS12	28S ribosomal protein S12, mitochondrial OS=Homo sapiens OX=9606 GN=MRPS12 PE=1 SV=1	NA	0.0235059	0.527692	-0.35123	0.152956	0.176462	-0.504186	0.0428441	2.20772	1.48677	0.00241636	0.735255	2.05972
O15269	SPTLC1	Serine palmitoyltransferase 1 OS=Homo sapiens OX=9606 GN=SPTLC1 PE=1 SV=1	NA	0.0886637	-0.188944	0.104788	-0.17282	-0.0841563	0.277608	0.124649	0.463437	0.287621	0.00241636	0.135124	1.06109
O15294	OGT	UDP-N-acetylglucosamine--peptide N-acetylglucosaminyltransferase 110 kDa subunit OS=Homo sapiens OX=9606 GN=OGT PE=1 SV=3	NA	-0.199042	-0.215202	0.0869389	0.0707786	-0.128263	0.0161603	0.446541	0.779348	0.221805	0.00241636	0.261429	0.0383107
O15305	PMM2	Phosphomannomutase 2 OS=Homo sapiens OX=9606 GN=PMM2 PE=1 SV=1	NA	0.0929463	-0.161031	0.0802472	-0.17373	-0.0807841	0.253978	0.157445	0.454124	0.21049	0.00241636	0.141213	1.12618
O15318	POLR3G	DNA-directed RNA polymerase III subunit RPC7 OS=Homo sapiens OX=9606 GN=POLR3G PE=1 SV=2	defense response to virus	0.279919	0.168148	-0.106065	-0.217836	0.0620832	0.111771	1.20424	0.773332	0.438942	0.0214154	0.208205	0.424431
O15344	MID1	E3 ubiquitin-protein ligase Midline-1 OS=Homo sapiens OX=9606 GN=MID1 PE=1 SV=1	NA	0.205017	-0.297639	0.336598	-0.166059	0.0389581	0.502656	1.00167	1.21156	0.884544	0.00241636	0.0694203	1.89913
O15347	HMGB3	High mobility group protein B3 OS=Homo sapiens OX=9606 GN=HMGB3 PE=1 SV=4	NA	-0.0225712	-0.0331958	-0.041885	-0.0525096	-0.0750808	0.0106246	0.0299693	0.0750315	0.123731	0.00241636	0.163767	0.0255466
O15355	PPM1G	Protein phosphatase 1G OS=Homo sapiens OX=9606 GN=PPM1G PE=1 SV=1	NA	0.119333	0.087344	0.0694005	0.0374114	0.156745	0.0319891	0.497586	0.440565	0.234896	0.00241636	0.706212	0.124633
O15371	EIF3D	Eukaryotic translation initiation factor 3 subunit D OS=Homo sapiens OX=9606 GN=EIF3D PE=1 SV=1	NA	-0.0101142	-0.0879332	0.0368462	-0.0409728	-0.051087	0.077819	0.0182722	0.439786	0.133334	0.00241636	0.172201	0.31543
O15372	EIF3H	Eukaryotic translation initiation factor 3 subunit H OS=Homo sapiens OX=9606 GN=EIF3H PE=1 SV=1	NA	0.0754761	-0.157165	0.16455	-0.0680908	0.00738535	0.232641	0.165611	0.512982	0.513654	0.00241636	0.0121461	1.03269
O15381	NVL	Nuclear valosin-containing protein-like OS=Homo sapiens OX=9606 GN=NVL PE=1 SV=1	NA	-1.12941	-0.245734	-0.590728	0.292945	-0.836462	-0.883673	2.42283	0.418317	1.98273	0.0214154	1.60735	4.01104
O15397	IPO8	Importin-8 OS=Homo sapiens OX=9606 GN=IPO8 PE=1 SV=2	NA	-0.488248	-0.694973	0.133081	-0.0736436	-0.561891	0.206725	1.45385	2.29384	0.281799	0.00241636	2.00591	0.491648
O15400	STX7	Syntaxin-7 OS=Homo sapiens OX=9606 GN=STX7 PE=1 SV=4	NA	0.0118504	-0.0585862	0.234354	0.163917	0.175767	0.0704366	0.0130691	0.126021	0.360993	0.00241636	0.207495	0.243545
O15446	CD3EAP	DNA-directed RNA polymerase I subunit RPA34 OS=Homo sapiens OX=9606 GN=CD3EAP PE=1 SV=1	NA	-0.736677	-0.174199	-0.562211	0.000267755	-0.73641	-0.562478	2.99447	0.440565	1.9301	0.000822304	3.00622	1.96658
O15460	P4HA2	Prolyl 4-hydroxylase subunit alpha-2 OS=Homo sapiens OX=9606 GN=P4HA2 PE=1 SV=1	NA	-0.116859	-0.445143	-0.0273569	-0.355641	-0.4725	0.328284	0.311724	1.43776	0.040125	0.0243944	1.89927	0.972946
O15479	MAGEB2	Melanoma-associated antigen B2 OS=Homo sapiens OX=9606 GN=MAGEB2 PE=1 SV=3	NA	-0.474006	-0.374561	-0.127924	-0.028479	-0.502485	-0.0994452	1.84461	2.31483	0.631247	0.00103347	2.95419	0.298359
O15498	YKT6	Synaptobrevin homolog YKT6 OS=Homo sapiens OX=9606 GN=YKT6 PE=1 SV=1	NA	-0.0327982	-0.293595	0.149649	-0.111148	-0.143946	0.260797	0.0343415	0.817653	0.318203	0.00241636	0.200206	0.930493
O15511	ARPC5	Actin-related protein 2/3 complex subunit 5 OS=Homo sapiens OX=9606 GN=ARPC5 PE=1 SV=3	NA	-0.0670576	-0.00769234	0.17464	0.234005	0.166948	-0.0593652	0.145006	0.0143474	0.471758	0.0214154	0.60146	0.148204
O15514	POLR2D	DNA-directed RNA polymerase II subunit RPB4 OS=Homo sapiens OX=9606 GN=POLR2D PE=1 SV=1	NA	-0.0685318	0.0929432	-0.031055	0.13042	0.0618882	-0.161475	0.0706004	0.219759	0.0836549	0.00241636	0.100511	0.365739
O15530	PDPK1	3-phosphoinositide-dependent protein kinase 1 OS=Homo sapiens OX=9606 GN=PDPK1 PE=1 SV=1	NA	0.33435	0.544412	-0.865031	-0.65497	-0.320619	-0.210062	0.133942	0.506987	0.947979	0.00241636	0.242932	0.117287
O15541	RNF113A	E3 ubiquitin-protein ligase RNF113A OS=Homo sapiens OX=9606 GN=RNF113A PE=1 SV=1	NA	-0.0547682	0.0605254	-0.0842421	0.0310515	-0.0237168	-0.115294	0.0783698	0.0929623	0.126892	0.00136168	0.0420616	0.189496
O43143	DHX15	Pre-mRNA-splicing factor ATP-dependent RNA helicase DHX15 OS=Homo sapiens OX=9606 GN=DHX15 PE=1 SV=2	NA	-0.479459	-0.127665	-0.3664	-0.0146056	-0.494065	-0.351795	1.48939	0.418644	1.25222	0.000822304	1.52903	1.28816
O43148	RNMT	mRNA cap guanine-N7 methyltransferase OS=Homo sapiens OX=9606 GN=RNMT PE=1 SV=1	NA	-0.219479	-0.417742	0.00416174	-0.194101	-0.413581	0.198263	0.238397	0.706374	0.00742776	0.00241636	0.629622	0.858955
O43159	RRP8	Ribosomal RNA-processing protein 8 OS=Homo sapiens OX=9606 GN=RRP8 PE=1 SV=2	NA	0.0498818	-0.215192	-0.702892	-0.967966	-0.918084	0.265074	0.0125238	0.0807361	0.290569	0.00241636	0.583131	0.0954326
O43164	PJA2	E3 ubiquitin-protein ligase Praja-2 OS=Homo sapiens OX=9606 GN=PJA2 PE=1 SV=4	NA	-1.16722	-1.11999	-0.0565315	-0.00929524	-1.17652	-0.0472362	0.965915	1.01068	0.0648969	0.000822304	1.03784	0.057221
O43169	CYB5B	Cytochrome b5 type B OS=Homo sapiens OX=9606 GN=CYB5B PE=1 SV=3	NA	-0.250438	-0.454559	0.0592476	-0.144874	-0.395311	0.204121	0.456959	1.33968	0.160452	0.00241636	1.12802	0.591359
O43172	PRPF4	U4/U6 small nuclear ribonucleoprotein Prp4 OS=Homo sapiens OX=9606 GN=PRPF4 PE=1 SV=2	NA	-0.267145	-0.22786	-0.114538	-0.0752527	-0.342398	-0.0392855	0.779781	1.01137	0.549155	0.00241636	1.66991	0.100606
O43175	PHGDH	D-3-phosphoglycerate dehydrogenase OS=Homo sapiens OX=9606 GN=PHGDH PE=1 SV=4	NA	-0.0225477	-0.298383	0.0874742	-0.188361	-0.210908	0.275835	0.0454222	1.33212	0.291045	0.0214154	0.837817	1.42376
O43181	NDUFS4	NADH dehydrogenase [ubiquinone] iron-sulfur protein 4, mitochondrial OS=Homo sapiens OX=9606 GN=NDUFS4 PE=1 SV=1	NA	-0.670306	-0.483226	-0.112427	0.0746526	-0.595653	-0.18708	2.44693	1.31097	0.214986	0.00241636	2.3568	0.445687
O43237	DYNC1LI2	Cytoplasmic dynein 1 light intermediate chain 2 OS=Homo sapiens OX=9606 GN=DYNC1LI2 PE=1 SV=1	NA	-0.249077	-0.444635	0.174037	-0.0215216	-0.270598	0.195559	0.980604	2.11739	0.494573	0.00103347	1.09989	0.677132
O43242	PSMD3	26S proteasome non-ATPase regulatory subunit 3 OS=Homo sapiens OX=9606 GN=PSMD3 PE=1 SV=2	NA	-0.0691495	-0.188189	0.0867375	-0.0323023	-0.101452	0.11904	0.13133	0.668655	0.376265	0.00241636	0.269075	0.570034
O43252	PAPSS1	Bifunctional 3'-phosphoadenosine 5'-phosphosulfate synthase 1 OS=Homo sapiens OX=9606 GN=PAPSS1 PE=1 SV=2	NA	-0.0855865	-0.292908	0.202453	-0.00486784	-0.0904543	0.207321	0.125555	1.01997	0.622232	0.000822304	0.163767	0.688329
O43264	ZW10	Centromere/kinetochore protein zw10 homolog OS=Homo sapiens OX=9606 GN=ZW10 PE=1 SV=3	NA	-0.0852524	-0.27636	0.14335	-0.0477577	-0.13301	0.191108	0.229914	1.30441	0.325733	0.00241636	0.291379	0.848422
O43290	SART1	U4/U6.U5 tri-snRNP-associated protein 1 OS=Homo sapiens OX=9606 GN=SART1 PE=1 SV=1	NA	-0.366702	-0.0407175	-0.449027	-0.123043	-0.489744	-0.325984	1.21601	0.0826157	1.3517	0.00241636	1.51654	1.17921
O43314	PPIP5K2	Inositol hexakisphosphate and diphosphoinositol-pentakisphosphate kinase 2 OS=Homo sapiens OX=9606 GN=PPIP5K2 PE=1 SV=3	NA	0.100976	0.100777	-0.0029008	-0.00310006	0.0978758	0.000199259	0.0962223	0.155737	0.00289047	0.000822304	0.131485	0.000247684
O43318	MAP3K7	Mitogen-activated protein kinase kinase kinase 7 OS=Homo sapiens OX=9606 GN=MAP3K7 PE=1 SV=1	NA	-0.0376374	-0.500166	0.0826367	-0.379892	-0.41753	0.462529	0.0228742	1.43323	0.144656	0.00241636	0.8975	0.771768
O43324	EEF1E1	Eukaryotic translation elongation factor 1 epsilon-1 OS=Homo sapiens OX=9606 GN=EEF1E1 PE=1 SV=1	NA	-0.124551	-0.467634	0.239215	-0.103867	-0.228419	0.343082	0.188048	1.42245	0.884544	0.00241636	0.548244	1.20319
O43347	MSI1	RNA-binding protein Musashi homolog 1 OS=Homo sapiens OX=9606 GN=MSI1 PE=1 SV=1	NA	0.120217	0.103821	0.154362	0.137966	0.258183	0.0163957	0.258901	0.283732	0.181605	0.00241636	0.343161	0.0374578
O43353	RIPK2	Receptor-interacting serine/threonine-protein kinase 2 OS=Homo sapiens OX=9606 GN=RIPK2 PE=1 SV=2	NA	0.241593	0.22778	-0.029399	-0.0432123	0.198381	0.0138133	0.584457	0.714716	0.0299958	0.00103347	0.345588	0.0189361
O43390	HNRNPR	Heterogeneous nuclear ribonucleoprotein R OS=Homo sapiens OX=9606 GN=HNRNPR PE=1 SV=1	NA	-0.955468	-0.199978	-0.77159	-0.0161002	-0.971568	-0.75549	4.28038	0.859288	3.20773	0.00103347	4.55006	3.06863
O43395	PRPF3	U4/U6 small nuclear ribonucleoprotein Prp3 OS=Homo sapiens OX=9606 GN=PRPF3 PE=1 SV=2	NA	-0.0851824	0.0861075	-0.233868	-0.0625781	-0.147761	-0.17129	0.241789	0.371003	1.2975	0.00241636	0.686568	0.836869
O43396	TXNL1	Thioredoxin-like protein 1 OS=Homo sapiens OX=9606 GN=TXNL1 PE=1 SV=3	NA	0.0953072	-0.0271786	-0.045792	-0.168278	-0.0729705	0.122486	0.180225	0.0795967	0.133334	0.00241636	0.271125	0.319151
O43399	TPD52L2	Tumor protein D54 OS=Homo sapiens OX=9606 GN=TPD52L2 PE=1 SV=2	NA	0.120937	0.000379418	-0.0344578	-0.155015	-0.0340784	0.120557	0.431165	0.000824766	0.0890331	0.00241636	0.100834	0.438039
O43402	EMC8	ER membrane protein complex subunit 8 OS=Homo sapiens OX=9606 GN=EMC8 PE=1 SV=1	NA	-0.653424	-0.888589	0.187165	-0.0479993	-0.701424	0.235164	0.600445	0.990565	0.450986	0.00241636	0.686568	0.885824
O43432	EIF4G3	Eukaryotic translation initiation factor 4 gamma 3 OS=Homo sapiens OX=9606 GN=EIF4G3 PE=1 SV=2	NA	0.429287	-0.0593238	0.0260163	-0.462595	-0.0333075	0.488611	0.429035	0.0540832	0.014775	0.00241636	0.0201986	0.573109
O43447	PPIH	Peptidyl-prolyl cis-trans isomerase H OS=Homo sapiens OX=9606 GN=PPIH PE=1 SV=1	NA	0.0373487	-0.0460221	0.065141	-0.0182298	0.0191189	0.0833708	0.067476	0.187952	0.21049	0.00103347	0.0378333	0.279168
O43464	HTRA2	Serine protease HTRA2, mitochondrial OS=Homo sapiens OX=9606 GN=HTRA2 PE=1 SV=2	NA	-0.198219	-0.0900212	-0.0301805	0.078017	-0.120202	-0.108198	0.384065	0.286014	0.0842142	0.00241636	0.439324	0.230402
O43488	AKR7A2	Aflatoxin B1 aldehyde reductase member 2 OS=Homo sapiens OX=9606 GN=AKR7A2 PE=1 SV=3	NA	0.200186	0.124477	0.103105	0.0273958	0.227582	0.0757092	0.125555	0.13092	0.115007	0.000822304	0.237251	0.0647459
O43491	EPB41L2	Band 4.1-like protein 2 OS=Homo sapiens OX=9606 GN=EPB41L2 PE=1 SV=1	NA	0.107378	-0.0295316	-0.00119567	-0.138105	-0.0307272	0.136909	0.236404	0.0739565	0.00209359	0.00241636	0.0579292	0.497977
O43504	LAMTOR5	Ragulator complex protein LAMTOR5 OS=Homo sapiens OX=9606 GN=LAMTOR5 PE=1 SV=1	NA	0.157389	-0.0502698	0.0459241	-0.161734	-0.00434572	0.207658	0.161161	0.0860255	0.102819	0.00241636	0.00645617	0.354099
O43583	DENR	Density-regulated protein OS=Homo sapiens OX=9606 GN=DENR PE=1 SV=2	NA	0.0752342	-0.0739289	0.0221967	-0.126966	-0.0517321	0.149163	0.165894	0.23377	0.0529993	0.00241636	0.112941	0.70127
O43592	XPOT	Exportin-T OS=Homo sapiens OX=9606 GN=XPOT PE=1 SV=2	NA	-0.37852	-0.212718	0.039549	0.205351	-0.173169	-0.165802	0.454903	0.23762	0.0386126	0.00241636	0.151251	0.332335
O43598	DNPH1	2'-deoxynucleoside 5'-phosphate N-hydrolase 1 OS=Homo sapiens OX=9606 GN=DNPH1 PE=1 SV=1	NA	0.0684354	-0.172398	0.166042	-0.074791	-0.00635562	0.240833	0.158789	0.761231	0.494829	0.00241636	0.0112487	1.04974
O43615	TIMM44	Mitochondrial import inner membrane translocase subunit TIM44 OS=Homo sapiens OX=9606 GN=TIMM44 PE=1 SV=2	NA	-0.027059	-0.19312	0.11058	-0.0554811	-0.0825401	0.166061	0.067476	0.997847	0.435445	0.00241636	0.396636	0.724414
O43617	TRAPPC3	Trafficking protein particle complex subunit 3 OS=Homo sapiens OX=9606 GN=TRAPPC3 PE=1 SV=1	NA	-0.10864	-0.5613	0.314357	-0.138303	-0.246944	0.45266	0.263579	2.69055	1.27672	0.00241636	1.0277	1.80992
O43633	CHMP2A	Charged multivesicular body protein 2a OS=Homo sapiens OX=9606 GN=CHMP2A PE=1 SV=1	NA	0.202331	-0.0351163	0.0230316	-0.214416	-0.0120847	0.237447	0.321369	0.0468825	0.0338602	0.00241636	0.0156496	0.53902
O43657	TSPAN6	Tetraspanin-6 OS=Homo sapiens OX=9606 GN=TSPAN6 PE=1 SV=1	NA	-1.32199	-1.46193	0.144626	0.00468498	-1.31731	0.139941	0.863815	1.22115	0.187513	0.000822304	1.09474	0.109672
O43660	PLRG1	Pleiotropic regulator 1 OS=Homo sapiens OX=9606 GN=PLRG1 PE=1 SV=1	NA	-0.763357	-0.209269	-0.650078	-0.0959895	-0.859347	-0.554088	2.68236	0.517575	1.90939	0.00241636	2.90708	1.66281
O43663	PRC1	Protein regulator of cytokinesis 1 OS=Homo sapiens OX=9606 GN=PRC1 PE=1 SV=2	NA	-0.546625	-0.34666	-0.217844	-0.0178788	-0.564504	-0.199965	1.93752	0.829582	0.291045	0.000822304	1.37068	0.403646
O43665	RGS10	Regulator of G-protein signaling 10 OS=Homo sapiens OX=9606 GN=RGS10 PE=1 SV=3	NA	0.16181	0.134441	0.0874163	0.0600473	0.221857	0.027369	0.777501	0.781979	0.275755	0.00241636	1.04293	0.0957018
O43670	ZNF207	BUB3-interacting and GLEBS motif-containing protein ZNF207 OS=Homo sapiens OX=9606 GN=ZNF207 PE=1 SV=1	NA	0.249398	0.164079	-0.178518	-0.263838	-0.0144393	0.0853193	0.356919	0.324379	0.28417	0.00241636	0.0156496	0.126185
O43674	NDUFB5	NADH dehydrogenase [ubiquinone] 1 beta subcomplex subunit 5, mitochondrial OS=Homo sapiens OX=9606 GN=NDUFB5 PE=1 SV=1	NA	-0.767619	-0.680061	0.0362894	0.123847	-0.643772	-0.0875572	2.21051	1.79936	0.0403771	0.00241636	1.63785	0.158506
O43676	NDUFB3	NADH dehydrogenase [ubiquinone] 1 beta subcomplex subunit 3 OS=Homo sapiens OX=9606 GN=NDUFB3 PE=1 SV=3	NA	-0.589546	-0.741721	0.13403	-0.0181456	-0.607692	0.152175	1.93752	1.22586	0.124798	0.000822304	1.36448	0.205007
O43678	NDUFA2	NADH dehydrogenase [ubiquinone] 1 alpha subcomplex subunit 2 OS=Homo sapiens OX=9606 GN=NDUFA2 PE=1 SV=3	NA	-0.55168	-0.769938	0.231791	0.013532	-0.538148	0.218259	0.791351	1.79234	0.2543	0.000822304	0.655972	0.361851
O43681	ASNA1	ATPase ASNA1 OS=Homo sapiens OX=9606 GN=ASNA1 PE=1 SV=2	NA	-0.0896652	-0.182462	0.0776127	-0.0151841	-0.104849	0.0927967	0.212384	0.906171	0.319241	0.00103347	0.360295	0.383712
O43683	BUB1	Mitotic checkpoint serine/threonine-protein kinase BUB1 OS=Homo sapiens OX=9606 GN=BUB1 PE=1 SV=1	NA	-0.378686	-0.479564	0.335954	0.235077	-0.143609	0.100878	0.699412	0.791739	0.295657	0.00241636	0.114893	0.121215
O43684	BUB3	Mitotic checkpoint protein BUB3 OS=Homo sapiens OX=9606 GN=BUB3 PE=1 SV=1	NA	-0.0879707	-0.322023	0.109425	-0.124627	-0.212598	0.234052	0.0861316	0.65492	0.2543	0.00241636	0.287709	0.863886
O43707	ACTN4	Alpha-actinin-4 OS=Homo sapiens OX=9606 GN=ACTN4 PE=1 SV=2	NA	-0.161601	-0.188291	0.0484318	0.0217413	-0.13986	0.0266905	0.251103	0.540295	0.141584	0.00103347	0.290698	0.0571816
O43715	TRIAP1	TP53-regulated inhibitor of apoptosis 1 OS=Homo sapiens OX=9606 GN=TRIAP1 PE=1 SV=1	NA	0.0738711	-0.188591	0.148935	-0.113527	-0.0396558	0.262462	0.142312	0.865543	0.421895	0.00241636	0.0950372	0.798882
O43716	GATC	Glutamyl-tRNA(Gln) amidotransferase subunit C, mitochondrial OS=Homo sapiens OX=9606 GN=GATC PE=1 SV=1	NA	0.197736	-0.223442	0.120086	-0.301093	-0.103356	0.421179	0.131792	0.262713	0.206156	0.00241636	0.0766837	0.731294
O43719	HTATSF1	HIV Tat-specific factor 1 OS=Homo sapiens OX=9606 GN=HTATSF1 PE=1 SV=1	NA	0.132565	0.155478	0.00669918	0.0296118	0.162177	-0.0229126	0.416775	0.850621	0.014775	0.00219234	0.688516	0.0654927
O43747	AP1G1	AP-1 complex subunit gamma-1 OS=Homo sapiens OX=9606 GN=AP1G1 PE=1 SV=5	NA	-0.671527	-0.197547	-0.291501	0.182479	-0.489048	-0.47398	1.50583	0.398613	0.476647	0.00241636	1.40102	0.808913
O43765	SGTA	Small glutamine-rich tetratricopeptide repeat-containing protein alpha OS=Homo sapiens OX=9606 GN=SGTA PE=1 SV=1	NA	0.0594706	-0.116465	0.121841	-0.0540952	0.00537539	0.175936	0.126607	0.458658	0.491184	0.00241636	0.0101563	1.00755
O43768	ENSA	Alpha-endosulfine OS=Homo sapiens OX=9606 GN=ENSA PE=1 SV=1	NA	0.141456	-0.0852179	0.0475404	-0.179134	-0.0376776	0.226674	0.613293	0.308178	0.124826	0.0214154	0.102409	0.983564
O43776	NARS1	Asparagine--tRNA ligase, cytoplasmic OS=Homo sapiens OX=9606 GN=NARS1 PE=1 SV=1	NA	-0.0341638	-0.213375	0.123877	-0.055334	-0.0894978	0.179211	0.0626749	0.981377	0.557223	0.00241636	0.256795	0.885657
O43795	MYO1B	Unconventional myosin-Ib OS=Homo sapiens OX=9606 GN=MYO1B PE=1 SV=3	NA	-0.746124	0.727832	-1.04271	0.431243	-0.314881	-1.47396	0.297215	0.404702	0.474078	0.00241636	0.0724661	1.51752
O43805	SSNA1	Sjoegren syndrome nuclear autoantigen 1 OS=Homo sapiens OX=9606 GN=SSNA1 PE=1 SV=2	NA	0.0970483	-0.0053282	-0.0737028	-0.176079	-0.079031	0.102376	0.20732	0.00743322	0.109691	0.00241636	0.159621	0.206225
O43809	NUDT21	Cleavage and polyadenylation specificity factor subunit 5 OS=Homo sapiens OX=9606 GN=NUDT21 PE=1 SV=1	NA	-0.0786622	-0.160954	0.161682	0.0793903	0.000728028	0.0822922	0.135558	0.618582	0.686435	0.00241636	0.000942154	0.237466
O43815	STRN	Striatin OS=Homo sapiens OX=9606 GN=STRN PE=1 SV=4	NA	0.239981	0.105985	0.00937103	-0.124625	0.115356	0.133996	0.703644	0.363823	0.0142672	0.00241636	0.318176	0.338256
O43818	RRP9	U3 small nucleolar RNA-interacting protein 2 OS=Homo sapiens OX=9606 GN=RRP9 PE=1 SV=1	NA	-1.42493	-0.144132	-1.47242	-0.19162	-1.61655	-1.2808	3.05128	0.164027	2.76981	0.00241636	3.62222	2.28749
O43819	SCO2	Protein SCO2 homolog, mitochondrial OS=Homo sapiens OX=9606 GN=SCO2 PE=1 SV=3	NA	0.0206436	-0.143843	0.0662473	-0.0982391	-0.0775955	0.164486	0.0351861	0.454124	0.142592	0.00241636	0.279636	0.435661
O43823	AKAP8	A-kinase anchor protein 8 OS=Homo sapiens OX=9606 GN=AKAP8 PE=1 SV=1	NA	-0.929917	-0.26272	-0.399761	0.267436	-0.662482	-0.667197	1.54658	0.292094	0.50351	0.00241636	0.806685	1.44181
O43837	IDH3B	Isocitrate dehydrogenase [NAD] subunit beta, mitochondrial OS=Homo sapiens OX=9606 GN=IDH3B PE=1 SV=2	NA	-0.149774	-0.159142	0.0407894	0.0314219	-0.118353	0.00936752	0.200359	0.339787	0.0733238	0.00103347	0.216334	0.0132671
O43847	NRDC	Nardilysin OS=Homo sapiens OX=9606 GN=NRDC PE=1 SV=3	NA	-0.12695	-0.482867	0.428964	0.0730467	-0.0539028	0.355917	0.112101	0.583645	0.500054	0.00241636	0.0426658	0.463164
O43852	CALU	Calumenin OS=Homo sapiens OX=9606 GN=CALU PE=1 SV=2	NA	0.147809	-0.0558652	-0.0179015	-0.221575	-0.0737667	0.203674	0.40766	0.133444	0.0379591	0.0214154	0.203394	0.721376
O43865	AHCYL1	S-adenosylhomocysteine hydrolase-like protein 1 OS=Homo sapiens OX=9606 GN=AHCYL1 PE=1 SV=2	NA	-0.113039	-0.180592	0.0200769	-0.0474764	-0.160515	0.0675532	0.167618	0.469003	0.0699361	0.00241636	0.340347	0.263262
O43896	KIF1C	Kinesin-like protein KIF1C OS=Homo sapiens OX=9606 GN=KIF1C PE=1 SV=3	NA	-0.951522	-0.805622	0.28179	0.42769	-0.523832	-0.1459	0.265004	0.439177	0.102819	0.00241636	0.275717	0.0370034
O43920	NDUFS5	NADH dehydrogenase [ubiquinone] iron-sulfur protein 5 OS=Homo sapiens OX=9606 GN=NDUFS5 PE=1 SV=3	NA	-0.182771	-0.242024	-0.137596	-0.196848	-0.37962	0.0592527	0.627301	1.05829	0.386663	0.00241636	1.80093	0.158458
O60216	RAD21	Double-strand-break repair protein rad21 homolog OS=Homo sapiens OX=9606 GN=RAD21 PE=1 SV=2	NA	-0.47698	-0.109604	-0.147764	0.219613	-0.257367	-0.367376	1.7728	0.406443	0.632623	0.00930022	0.997785	1.53033
O60220	TIMM8A	Mitochondrial import inner membrane translocase subunit Tim8 A OS=Homo sapiens OX=9606 GN=TIMM8A PE=1 SV=1	NA	0.109662	0.0123356	-0.116514	-0.21384	-0.104178	0.0973265	0.21	0.0220515	0.290435	0.00241636	0.296694	0.225369
O60231	DHX16	Pre-mRNA-splicing factor ATP-dependent RNA helicase DHX16 OS=Homo sapiens OX=9606 GN=DHX16 PE=1 SV=2	NA	-0.200016	-0.242425	0.00413553	-0.038273	-0.238289	0.0424086	0.242073	0.32465	0.00289047	0.00103347	0.341619	0.0470908
O60232	ZNRD2	Protein ZNRD2 OS=Homo sapiens OX=9606 GN=ZNRD2 PE=1 SV=1	NA	0.148458	0.147839	-0.0441116	-0.0447307	0.103727	0.000619126	0.356919	0.550108	0.115007	0.00241636	0.264338	0.000924215
O60256	PRPSAP2	Phosphoribosyl pyrophosphate synthase-associated protein 2 OS=Homo sapiens OX=9606 GN=PRPSAP2 PE=1 SV=1	NA	0.0296627	-0.229747	0.151807	-0.107603	-0.0779401	0.25941	0.067476	1.45359	0.83308	0.00241636	0.344221	1.2987
O60264	SMARCA5	SWI/SNF-related matrix-associated actin-dependent regulator of chromatin subfamily A member 5 OS=Homo sapiens OX=9606 GN=SMARCA5 PE=1 SV=1	NA	-1.63631	-0.48661	-1.06909	0.0806117	-1.5557	-1.1497	3.92754	1.41626	2.91346	0.00241636	3.5522	3.35803
O60271	SPAG9	C-Jun-amino-terminal kinase-interacting protein 4 OS=Homo sapiens OX=9606 GN=SPAG9 PE=1 SV=4	NA	-0.00713135	-0.167592	0.187245	0.0267846	0.0196532	0.16046	0.0115776	1.09912	0.96075	0.00103347	0.0486602	0.627903
O60306	AQR	RNA helicase aquarius OS=Homo sapiens OX=9606 GN=AQR PE=1 SV=4	NA	-1.17676	-1.04463	0.259266	0.391394	-0.785367	-0.132128	1.91109	1.54913	0.195728	0.00241636	0.944284	0.12623
O60313	OPA1	Dynamin-like 120 kDa protein, mitochondrial OS=Homo sapiens OX=9606 GN=OPA1 PE=1 SV=3	NA	-0.0711467	-0.250502	0.185316	0.00596017	-0.0651866	0.179355	0.146358	1.0475	0.749554	0.000822304	0.195569	0.641104
O60333	KIF1B	Kinesin-like protein KIF1B OS=Homo sapiens OX=9606 GN=KIF1B PE=1 SV=5	NA	-0.261493	-0.155838	0.110079	0.215734	-0.0457585	-0.105655	0.622387	0.280047	0.122793	0.00241636	0.0442957	0.173552
O60341	KDM1A	Lysine-specific histone demethylase 1A OS=Homo sapiens OX=9606 GN=KDM1A PE=1 SV=2	NA	-0.621181	-0.366915	-0.241005	0.0132605	-0.60792	-0.254266	1.72437	0.907947	0.894485	0.000822304	1.88269	0.846113
O60343	TBC1D4	TBC1 domain family member 4 OS=Homo sapiens OX=9606 GN=TBC1D4 PE=1 SV=2	NA	0.145782	-0.0140296	0.0373188	-0.122493	0.0232892	0.159812	0.357062	0.0385084	0.111961	0.00241636	0.0450466	0.566505
O60488	ACSL4	Long-chain-fatty-acid--CoA ligase 4 OS=Homo sapiens OX=9606 GN=ACSL4 PE=1 SV=2	NA	0.0590562	-0.0442309	0.105713	0.00242615	0.0614824	0.103287	0.103196	0.161992	0.437864	0.000822304	0.195569	0.306843
O60493	SNX3	Sorting nexin-3 OS=Homo sapiens OX=9606 GN=SNX3 PE=1 SV=3	NA	0.188849	0.0640113	0.0737123	-0.051125	0.137724	0.124837	0.653664	0.241066	0.194546	0.00241636	0.526257	0.38791
O60502	OGA	Protein O-GlcNAcase OS=Homo sapiens OX=9606 GN=OGA PE=1 SV=2	NA	-0.0703791	-0.18789	0.0576255	-0.0598853	-0.130264	0.117511	0.178721	0.989274	0.225304	0.00241636	0.490302	0.60271
O60506	SYNCRIP	Heterogeneous nuclear ribonucleoprotein Q OS=Homo sapiens OX=9606 GN=SYNCRIP PE=1 SV=2	NA	-0.674978	-0.3072	-0.323446	0.0443327	-0.630645	-0.367778	2.84445	1.20677	1.71179	0.00241636	2.82772	1.82392
O60508	CDC40	Pre-mRNA-processing factor 17 OS=Homo sapiens OX=9606 GN=CDC40 PE=1 SV=1	NA	-1.50861	-0.473262	-1.36133	-0.325977	-1.83459	-1.03535	2.09571	0.429156	2.01466	0.0214154	2.38931	1.7085
O60524	NEMF	Nuclear export mediator factor NEMF OS=Homo sapiens OX=9606 GN=NEMF PE=1 SV=4	NA	0.00856423	-0.127371	0.370143	0.234208	0.242772	0.135935	0.0115776	0.194112	0.472084	0.00241636	0.362866	0.237214
O60547	GMDS	GDP-mannose 4,6 dehydratase OS=Homo sapiens OX=9606 GN=GMDS PE=1 SV=1	NA	0.191345	-0.0451147	0.162078	-0.0743814	0.116963	0.236459	0.468978	0.100241	0.565834	0.00241636	0.281068	0.878418
O60563	CCNT1	Cyclin-T1 OS=Homo sapiens OX=9606 GN=CCNT1 PE=1 SV=1	NA	0.237388	0.10294	0.220129	0.0856815	0.323069	0.134447	0.201759	0.0938778	0.216096	0.00241636	0.433409	0.125857
O60566	BUB1B	Mitotic checkpoint serine/threonine-protein kinase BUB1 beta OS=Homo sapiens OX=9606 GN=BUB1B PE=1 SV=3	NA	0.172244	0.209692	0.0128318	0.0502797	0.222524	-0.0374479	0.312527	0.613491	0.015246	0.00224569	0.694001	0.0555337
O60568	PLOD3	Multifunctional procollagen lysine hydroxylase and glycosyltransferase LH3 OS=Homo sapiens OX=9606 GN=PLOD3 PE=1 SV=1	NA	0.0261226	-0.685609	0.426791	-0.28494	-0.258818	0.711732	0.00292328	0.191785	0.114762	0.00219234	0.0599256	0.181636
O60610	DIAPH1	Protein diaphanous homolog 1 OS=Homo sapiens OX=9606 GN=DIAPH1 PE=1 SV=2	NA	-0.116721	-0.242402	0.167663	0.0419822	-0.074739	0.12568	0.205525	0.9489	0.675789	0.00241636	0.216503	0.322743
O60613	SELENOF	Selenoprotein F OS=Homo sapiens OX=9606 GN=SELENOF PE=1 SV=4	NA	0.21388	0.108725	0.15059	0.0454343	0.259314	0.105155	0.497088	0.369026	0.59044	0.00241636	1.03784	0.27732
O60664	PLIN3	Perilipin-3 OS=Homo sapiens OX=9606 GN=PLIN3 PE=1 SV=3	NA	0.0928191	-0.0114089	0.0822934	-0.0219346	0.0708844	0.104228	0.263803	0.0371752	0.257338	0.00103347	0.187692	0.451977
O60678	PRMT3	Protein arginine N-methyltransferase 3 OS=Homo sapiens OX=9606 GN=PRMT3 PE=1 SV=4	NA	0.0630959	-0.287524	0.322124	-0.0284956	0.0346003	0.35062	0.054802	0.56917	0.755522	0.00103347	0.0343184	0.73364
O60684	KPNA6	Importin subunit alpha-7 OS=Homo sapiens OX=9606 GN=KPNA6 PE=1 SV=1	NA	-0.0857601	-0.141518	-0.0248394	-0.0805978	-0.166358	0.0557584	0.185989	0.544093	0.0409437	0.00241636	0.429593	0.157972
O60701	UGDH	UDP-glucose 6-dehydrogenase OS=Homo sapiens OX=9606 GN=UGDH PE=1 SV=1	NA	0.0674595	-0.189433	0.0657055	-0.191187	-0.123728	0.256893	0.0986058	0.529893	0.132178	0.00241636	0.267683	0.761651
O60716	CTNND1	Catenin delta-1 OS=Homo sapiens OX=9606 GN=CTNND1 PE=1 SV=1	NA	-0.0845657	-0.0965448	-0.0292492	-0.0412284	-0.125794	0.0119791	0.21	0.429156	0.0972198	0.00241636	0.523703	0.0348529
O60749	SNX2	Sorting nexin-2 OS=Homo sapiens OX=9606 GN=SNX2 PE=1 SV=2	NA	-0.0127542	-0.19217	0.205715	0.0262986	0.0135445	0.179416	0.0224598	1.25271	1.17107	0.00219234	0.0361204	0.789391
O60762	DPM1	Dolichol-phosphate mannosyltransferase subunit 1 OS=Homo sapiens OX=9606 GN=DPM1 PE=1 SV=1	NA	-0.215997	-0.113071	-0.276709	-0.173782	-0.38978	-0.102927	0.17768	0.121925	0.47425	0.00241636	0.587632	0.12278
O60763	USO1	General vesicular transport factor p115 OS=Homo sapiens OX=9606 GN=USO1 PE=1 SV=2	NA	0.0316846	-0.108992	0.166211	0.0255337	0.0572183	0.140677	0.0616294	0.338436	0.57828	0.00241636	0.167315	0.487183
O60783	MRPS14	28S ribosomal protein S14, mitochondrial OS=Homo sapiens OX=9606 GN=MRPS14 PE=1 SV=1	NA	0.371825	0.424002	0.087672	0.139848	0.511674	-0.0521762	0.760863	0.981855	0.0676083	0.00241636	0.762749	0.061489
O60784	TOM1	Target of Myb protein 1 OS=Homo sapiens OX=9606 GN=TOM1 PE=1 SV=2	NA	0.2212	-0.0967539	0.0796841	-0.23827	-0.0170698	0.317954	0.65816	0.253625	0.205676	0.0214154	0.0283204	1.24234
O60826	CCDC22	Coiled-coil domain-containing protein 22 OS=Homo sapiens OX=9606 GN=CCDC22 PE=1 SV=1	NA	0.150488	-0.0300683	0.108115	-0.0724414	0.0780471	0.180557	0.297215	0.0629574	0.208569	0.00241636	0.133154	0.481496
O60828	PQBP1	Polyglutamine-binding protein 1 OS=Homo sapiens OX=9606 GN=PQBP1 PE=1 SV=1	defense response to virus	-0.165436	-0.0368067	-0.172341	-0.0437118	-0.209148	-0.128629	0.590517	0.167216	0.885897	0.00241636	1.14229	0.532223
O60832	DKC1	H/ACA ribonucleoprotein complex subunit DKC1 OS=Homo sapiens OX=9606 GN=DKC1 PE=1 SV=3	NA	-1.62729	-0.25976	-1.37345	-0.00591895	-1.63321	-1.36753	5.03319	0.730441	3.56548	0.000822304	5.31965	3.40946
O60841	EIF5B	Eukaryotic translation initiation factor 5B OS=Homo sapiens OX=9606 GN=EIF5B PE=1 SV=4	NA	0.205527	0.0636573	0.0865305	-0.0553388	0.150188	0.141869	0.782397	0.197177	0.291045	0.00241636	0.70836	0.511601
O60869	EDF1	Endothelial differentiation-related factor 1 OS=Homo sapiens OX=9606 GN=EDF1 PE=1 SV=1	NA	0.0499066	-0.0460769	0.141326	0.0453422	0.0952488	0.0959835	0.0761712	0.0807361	0.249408	0.00241636	0.180323	0.191153
O60884	DNAJA2	DnaJ homolog subfamily A member 2 OS=Homo sapiens OX=9606 GN=DNAJA2 PE=1 SV=1	NA	-0.000695842	-0.173001	0.314092	0.141787	0.141091	0.172305	0.000608766	0.5521	0.867121	0.00241636	0.416463	0.465857
O60885	BRD4	Bromodomain-containing protein 4 OS=Homo sapiens OX=9606 GN=BRD4 PE=1 SV=2	NA	-1.02445	-0.530743	-0.543597	-0.0498904	-1.07434	-0.493707	4.218	1.32252	1.32977	0.00241636	4.48545	1.20975
O60888	CUTA	Protein CutA OS=Homo sapiens OX=9606 GN=CUTA PE=1 SV=2	NA	-0.11153	-0.204026	0.0386942	-0.053802	-0.165332	0.0924962	0.122936	0.56782	0.142666	0.00241636	0.379638	0.18693
O60925	PFDN1	Prefoldin subunit 1 OS=Homo sapiens OX=9606 GN=PFDN1 PE=1 SV=2	NA	0.13226	-0.0950172	0.194536	-0.0327421	0.0995184	0.227278	0.365572	0.474321	0.716218	0.00172967	0.330203	0.828877
O60934	NBN	Nibrin OS=Homo sapiens OX=9606 GN=NBN PE=1 SV=1	NA	-0.13877	-0.311819	-0.544059	-0.717108	-0.855878	0.173049	0.0593915	0.39148	1.26663	0.00241636	1.13578	0.146943
O75044	SRGAP2	SLIT-ROBO Rho GTPase-activating protein 2 OS=Homo sapiens OX=9606 GN=SRGAP2 PE=1 SV=3	NA	-0.155302	-0.184959	0.316847	0.28719	0.131888	0.0296573	0.154938	0.198935	0.267543	0.00241636	0.103451	0.025178
O75083	WDR1	WD repeat-containing protein 1 OS=Homo sapiens OX=9606 GN=WDR1 PE=1 SV=4	NA	-0.0251211	-0.255824	0.190254	-0.0404489	-0.0655701	0.230703	0.0251022	0.667944	0.748364	0.00241636	0.0979862	0.86494
O75113	N4BP1	NEDD4-binding protein 1 OS=Homo sapiens OX=9606 GN=N4BP1 PE=1 SV=4	NA	0.0766271	-0.0528665	0.0447035	-0.0847901	-0.008163	0.129494	0.0421206	0.0421763	0.034665	0.00172967	0.00873201	0.0957051
O75116	ROCK2	Rho-associated protein kinase 2 OS=Homo sapiens OX=9606 GN=ROCK2 PE=1 SV=4	NA	-0.0606275	-0.208666	0.0600805	-0.0879575	-0.148585	0.148038	0.128122	0.586496	0.124798	0.00241636	0.511083	0.434726
O75122	CLASP2	CLIP-associating protein 2 OS=Homo sapiens OX=9606 GN=CLASP2 PE=1 SV=3	NA	-0.0975849	-0.113308	0.0113359	-0.00438697	-0.101972	0.0157228	0.189456	0.448074	0.021752	0.000822304	0.312309	0.0318227
O75127	PTCD1	Pentatricopeptide repeat-containing protein 1, mitochondrial OS=Homo sapiens OX=9606 GN=PTCD1 PE=1 SV=2	NA	-0.141021	-0.122811	-0.00730595	0.0109038	-0.130117	-0.0182098	0.200227	0.28313	0.00859518	0.000822304	0.256775	0.0236669
O75131	CPNE3	Copine-3 OS=Homo sapiens OX=9606 GN=CPNE3 PE=1 SV=1	NA	-0.346357	-0.455707	0.118968	0.00961831	-0.336739	0.10935	0.697218	1.25045	0.274207	0.000822304	0.668378	0.33054
O75146	HIP1R	Huntingtin-interacting protein 1-related protein OS=Homo sapiens OX=9606 GN=HIP1R PE=1 SV=2	NA	0.241203	-0.0507004	0.175948	-0.115956	0.125247	0.291904	0.680697	0.121209	0.548009	0.00241636	0.261835	1.26142
O75150	RNF40	E3 ubiquitin-protein ligase BRE1B OS=Homo sapiens OX=9606 GN=RNF40 PE=1 SV=5	NA	-0.0959037	-0.161298	0.0592259	-0.00616876	-0.102072	0.0653946	0.275175	0.65492	0.14142	0.000822304	0.269075	0.234953
O75152	ZC3H11A	Zinc finger CCCH domain-containing protein 11A OS=Homo sapiens OX=9606 GN=ZC3H11A PE=1 SV=3	NA	-0.26201	0.041688	-0.348879	-0.045181	-0.307191	-0.303698	0.681642	0.0872639	1.70032	0.00241636	0.907361	1.44891
O75153	CLUH	Clustered mitochondria protein homolog OS=Homo sapiens OX=9606 GN=CLUH PE=1 SV=2	NA	0.0441726	-0.0768439	0.123947	0.00293089	0.0471035	0.121016	0.104632	0.354564	0.569528	0.000822304	0.14424	0.58966
O75157	TSC22D2	TSC22 domain family protein 2 OS=Homo sapiens OX=9606 GN=TSC22D2 PE=1 SV=3	NA	0.0273878	0.273479	0.142434	0.388525	0.415913	-0.246092	0.0110699	0.181766	0.0549729	0.00241636	0.207495	0.16904
O75175	CNOT3	CCR4-NOT transcription complex subunit 3 OS=Homo sapiens OX=9606 GN=CNOT3 PE=1 SV=1	NA	0.294586	0.0938226	0.0275361	-0.173227	0.121359	0.200763	0.555223	0.197177	0.0488935	0.00241636	0.246706	0.447772
O75179	ANKRD17	Ankyrin repeat domain-containing protein 17 OS=Homo sapiens OX=9606 GN=ANKRD17 PE=1 SV=3	NA	0.0460575	-0.0347781	0.0613047	-0.0195309	0.0265266	0.0808356	0.105202	0.0984785	0.142592	0.00103347	0.0487555	0.28523
O75190	DNAJB6	DnaJ homolog subfamily B member 6 OS=Homo sapiens OX=9606 GN=DNAJB6 PE=1 SV=2	NA	0.0689555	-0.174934	0.0289396	-0.21495	-0.145994	0.243889	0.0419113	0.702761	0.0654195	0.00241636	0.705477	0.254265
O75191	XYLB	Xylulose kinase OS=Homo sapiens OX=9606 GN=XYLB PE=1 SV=3	NA	0.288056	0.0693196	0.00596744	-0.212769	0.075287	0.218736	0.169737	0.107774	0.00599106	0.00241636	0.148327	0.158872
O75208	COQ9	Ubiquinone biosynthesis protein COQ9, mitochondrial OS=Homo sapiens OX=9606 GN=COQ9 PE=1 SV=1	NA	-0.0931739	-0.364286	0.372005	0.100893	0.00771931	0.271112	0.125555	0.995087	0.78226	0.00241636	0.0112839	0.539396
O75223	GGCT	Gamma-glutamylcyclotransferase OS=Homo sapiens OX=9606 GN=GGCT PE=1 SV=1	NA	-0.245227	-0.404256	0.127924	-0.0311047	-0.276332	0.159029	0.469626	1.28802	0.224896	0.00103347	0.471012	0.497344
O75251	NDUFS7	NADH dehydrogenase [ubiquinone] iron-sulfur protein 7, mitochondrial OS=Homo sapiens OX=9606 GN=NDUFS7 PE=1 SV=3	NA	-0.298128	-0.256138	0.267588	0.309578	0.0114504	-0.0419896	0.944065	1.1197	0.261031	0.00241636	0.00841245	0.105848
O75306	NDUFS2	NADH dehydrogenase [ubiquinone] iron-sulfur protein 2, mitochondrial OS=Homo sapiens OX=9606 GN=NDUFS2 PE=1 SV=2	NA	0.116004	-0.176797	-0.0124128	-0.305214	-0.18921	0.292801	0.0619929	0.186318	0.0142279	0.00241636	0.183291	0.350472
O75312	ZPR1	Zinc finger protein ZPR1 OS=Homo sapiens OX=9606 GN=ZPR1 PE=1 SV=1	NA	0.00797245	-0.154039	0.177128	0.0151165	0.0230889	0.162011	0.0160598	0.945602	0.989404	0.00103347	0.0725465	0.788395
O75323	NIPSNAP2	Protein NipSnap homolog 2 OS=Homo sapiens OX=9606 GN=NIPSNAP2 PE=1 SV=1	NA	0.174118	0.215196	-0.530432	-0.489354	-0.315236	-0.0410778	0.076728	0.133444	0.376265	0.00241636	0.17502	0.0239655
O75330	HMMR	Hyaluronan mediated motility receptor OS=Homo sapiens OX=9606 GN=HMMR PE=1 SV=2	NA	-0.514477	-0.481662	0.00491785	0.0377331	-0.476744	-0.0328152	0.683295	0.773417	0.00568375	0.00103347	0.602759	0.0636064
O75340	PDCD6	Programmed cell death protein 6 OS=Homo sapiens OX=9606 GN=PDCD6 PE=1 SV=1	NA	-0.836584	-0.6751	-0.186053	-0.0245694	-0.861153	-0.161483	1.7107	2.54615	0.269949	0.000822304	1.87599	0.250533
O75347	TBCA	Tubulin-specific chaperone A OS=Homo sapiens OX=9606 GN=TBCA PE=1 SV=3	NA	0.220393	-0.00710565	0.148113	-0.0793859	0.141007	0.227499	0.771082	0.0137939	0.29243	0.00241636	0.270315	0.878418
O75348	ATP6V1G1	V-type proton ATPase subunit G 1 OS=Homo sapiens OX=9606 GN=ATP6V1G1 PE=1 SV=3	NA	0.329104	0.166679	0.104946	-0.0574793	0.271625	0.162425	1.80062	0.829808	0.351888	0.00241636	1.27084	0.802924
O75351	VPS4B	Vacuolar protein sorting-associated protein 4B OS=Homo sapiens OX=9606 GN=VPS4B PE=1 SV=2	NA	0.068801	-0.111584	0.11531	-0.0650758	0.00372525	0.180385	0.165611	0.541179	0.46137	0.00241636	0.0092898	0.758594
O75368	SH3BGRL	SH3 domain-binding glutamic acid-rich-like protein OS=Homo sapiens OX=9606 GN=SH3BGRL PE=1 SV=1	NA	-0.344131	-0.541357	0.113182	-0.0840446	-0.428176	0.197226	0.908814	1.76337	0.219287	0.00241636	0.979777	0.761651
O75369	FLNB	Filamin-B OS=Homo sapiens OX=9606 GN=FLNB PE=1 SV=2	NA	-0.00744715	-0.0774921	0.0769931	0.00694819	-0.000498961	0.0700449	0.0131987	0.344862	0.342257	0.000822304	0.000942154	0.306162
O75376	NCOR1	Nuclear receptor corepressor 1 OS=Homo sapiens OX=9606 GN=NCOR1 PE=1 SV=2	NA	-0.41977	0.127095	-0.169559	0.377306	-0.042464	-0.546865	0.703644	0.0984785	0.121461	0.00241636	0.0338244	0.621596
O75380	NDUFS6	NADH dehydrogenase [ubiquinone] iron-sulfur protein 6, mitochondrial OS=Homo sapiens OX=9606 GN=NDUFS6 PE=1 SV=1	NA	-0.355834	-0.256283	0.0044981	0.10405	-0.251785	-0.0995515	1.7728	1.13428	0.00854512	0.00241636	1.41265	0.304472
O75381	PEX14	Peroxisomal membrane protein PEX14 OS=Homo sapiens OX=9606 GN=PEX14 PE=1 SV=1	NA	-0.236561	-0.306462	0.0728113	0.00291045	-0.23365	0.0699008	0.547798	0.853688	0.160267	0.000822304	0.522038	0.211343
O75390	CS	Citrate synthase, mitochondrial OS=Homo sapiens OX=9606 GN=CS PE=1 SV=2	NA	-0.00693448	-0.184354	0.169609	-0.00781019	-0.0147447	0.17742	0.00941174	0.66833	0.583873	0.000822304	0.0220837	0.69127
O75396	SEC22B	Vesicle-trafficking protein SEC22b OS=Homo sapiens OX=9606 GN=SEC22B PE=1 SV=4	NA	-0.106703	-0.148239	0.0352724	-0.00626313	-0.112967	0.0415355	0.31366	0.766616	0.122793	0.000822304	0.416632	0.158872
O75400	PRPF40A	Pre-mRNA-processing factor 40 homolog A OS=Homo sapiens OX=9606 GN=PRPF40A PE=1 SV=2	NA	-0.253846	-0.114735	-0.18205	-0.0429384	-0.296785	-0.139112	0.894012	0.212137	0.302081	0.00241636	1.69189	0.234953
O75410	TACC1	Transforming acidic coiled-coil-containing protein 1 OS=Homo sapiens OX=9606 GN=TACC1 PE=1 SV=2	NA	0.189332	0.00308614	0.289196	0.10295	0.292282	0.186246	0.112812	0.00113958	0.105286	0.00103347	0.149584	0.0901851
O75431	MTX2	Metaxin-2 OS=Homo sapiens OX=9606 GN=MTX2 PE=1 SV=1	NA	-1.39147	-0.855467	-0.806007	-0.270008	-1.66147	-0.535999	1.38214	1.58545	1.39964	0.00241636	2.48708	0.505847
O75436	VPS26A	Vacuolar protein sorting-associated protein 26A OS=Homo sapiens OX=9606 GN=VPS26A PE=1 SV=2	NA	0.15586	-0.128814	0.143809	-0.140865	0.0149958	0.284674	0.24574	0.305295	0.291045	0.00241636	0.0242103	0.601448
O75438	NDUFB1	NADH dehydrogenase [ubiquinone] 1 beta subcomplex subunit 1 OS=Homo sapiens OX=9606 GN=NDUFB1 PE=1 SV=1	NA	-0.223739	-0.392011	-0.255319	-0.423591	-0.647329	0.168272	0.245048	1.34665	0.608224	0.00241636	2.25988	0.223367
O75439	PMPCB	Mitochondrial-processing peptidase subunit beta OS=Homo sapiens OX=9606 GN=PMPCB PE=1 SV=2	NA	-0.0680869	-0.239942	0.158924	-0.0129307	-0.0810176	0.171855	0.135558	1.01896	0.622577	0.000822304	0.178889	0.90374
O75475	PSIP1	PC4 and SFRS1-interacting protein OS=Homo sapiens OX=9606 GN=PSIP1 PE=1 SV=1	NA	-2.82333	-1.09665	-1.72796	-0.00127884	-2.82461	-1.72668	6.02375	3.04207	4.15323	0.000822304	6.24797	4.22362
O75477	ERLIN1	Erlin-1 OS=Homo sapiens OX=9606 GN=ERLIN1 PE=1 SV=2	NA	-0.54093	-0.736802	-0.240692	-0.436564	-0.977494	0.195872	0.675616	1.03774	0.494829	0.069342	1.68719	0.354819
O75489	NDUFS3	NADH dehydrogenase [ubiquinone] iron-sulfur protein 3, mitochondrial OS=Homo sapiens OX=9606 GN=NDUFS3 PE=1 SV=1	NA	-0.270174	-0.495504	0.0580171	-0.167313	-0.437487	0.22533	0.715565	2.16928	0.165541	0.00241636	2.01522	0.657083
O75494	SRSF10	Serine/arginine-rich splicing factor 10 OS=Homo sapiens OX=9606 GN=SRSF10 PE=1 SV=1	NA	-1.14385	0.961395	-2.12879	-0.0235465	-1.16739	-2.10524	3.58105	1.58646	2.9143	0.000822304	2.52069	3.2977
O75496	GMNN	Geminin OS=Homo sapiens OX=9606 GN=GMNN PE=1 SV=1	NA	-0.222844	-0.219523	-0.0107404	-0.00741989	-0.230263	-0.0033205	0.590068	0.626906	0.0164603	0.000822304	0.852153	0.00549944
O75503	CLN5	Ceroid-lipofuscinosis neuronal protein 5 OS=Homo sapiens OX=9606 GN=CLN5 PE=1 SV=2	NA	-0.17674	-0.539591	0.0400557	-0.322795	-0.499535	0.362851	0.102	1.06187	0.0598784	0.00241636	0.769791	0.446859
O75506	HSBP1	Heat shock factor-binding protein 1 OS=Homo sapiens OX=9606 GN=HSBP1 PE=1 SV=1	NA	-0.381506	-0.52681	-0.103849	-0.249153	-0.630659	0.145304	0.393584	1.26338	0.210598	0.00241636	1.50569	0.167836
O75521	ECI2	Enoyl-CoA delta isomerase 2, mitochondrial OS=Homo sapiens OX=9606 GN=ECI2 PE=1 SV=4	NA	-0.331897	-0.408357	0.0822336	0.00577376	-0.326123	0.0764598	1.87373	1.93456	0.23634	0.000822304	1.61457	0.294761
O75528	TADA3	Transcriptional adapter 3 OS=Homo sapiens OX=9606 GN=TADA3 PE=1 SV=1	NA	0.420821	0.406087	1.21066	1.19593	1.61675	0.0147335	0.129905	0.0999009	0.244679	0.00241636	0.549315	0.00262115
O75530	EED	Polycomb protein EED OS=Homo sapiens OX=9606 GN=EED PE=1 SV=2	NA	-1.50348	-0.802765	-0.659037	0.0416782	-1.4618	-0.700716	1.87373	0.967827	1.41559	0.00103347	1.91287	1.35457
O75531	BANF1	Barrier-to-autointegration factor OS=Homo sapiens OX=9606 GN=BANF1 PE=1 SV=1	NA	-0.0174247	0.337577	-0.330247	0.0247545	0.00732986	-0.355001	0.0160598	0.798733	1.63008	0.00136168	0.00914211	1.60734
O75533	SF3B1	Splicing factor 3B subunit 1 OS=Homo sapiens OX=9606 GN=SF3B1 PE=1 SV=3	NA	-0.114845	-0.0945807	-0.0548416	-0.034577	-0.149422	-0.0202646	0.269778	0.311882	0.180005	0.00241636	0.637568	0.0497281
O75534	CSDE1	Cold shock domain-containing protein E1 OS=Homo sapiens OX=9606 GN=CSDE1 PE=1 SV=2	NA	-0.00472892	-0.184364	0.143254	-0.0363805	-0.0411095	0.179635	0.00935023	1.01896	0.558999	0.00241636	0.116296	0.77302
O75569	PRKRA	Interferon-inducible double-stranded RNA-dependent protein kinase activator A OS=Homo sapiens OX=9606 GN=PRKRA PE=1 SV=1	NA	0.14896	0.148161	-0.185204	-0.186003	-0.0370426	0.000799012	0.402099	0.541179	0.613077	0.00241636	0.0694203	0.00130899
O75575	CRCP	DNA-directed RNA polymerase III subunit RPC9 OS=Homo sapiens OX=9606 GN=CRCP PE=1 SV=1	defense response to virus	0.0123153	-0.00215759	0.011701	-0.00277194	0.00954339	0.0144729	0.0131987	0.00366279	0.028703	0.000822304	0.0174198	0.0270018
O75592	MYCBP2	E3 ubiquitin-protein ligase MYCBP2 OS=Homo sapiens OX=9606 GN=MYCBP2 PE=1 SV=4	NA	0.077021	0.204354	-0.470958	-0.343625	-0.266604	-0.127333	0.0399896	0.18437	0.327131	0.00241636	0.207495	0.079932
O75607	NPM3	Nucleoplasmin-3 OS=Homo sapiens OX=9606 GN=NPM3 PE=1 SV=3	NA	-0.465063	0.133523	-0.728903	-0.130317	-0.59538	-0.598586	1.03618	0.179625	1.19453	0.00241636	1.57523	0.962869
O75608	LYPLA1	Acyl-protein thioesterase 1 OS=Homo sapiens OX=9606 GN=LYPLA1 PE=1 SV=1	NA	-0.143231	-0.364874	0.220922	-0.000720806	-0.143952	0.221643	0.26798	1.24151	0.639694	0.000822304	0.370027	0.619783
O75616	ERAL1	GTPase Era, mitochondrial OS=Homo sapiens OX=9606 GN=ERAL1 PE=1 SV=2	NA	0.0575012	-0.0335883	0.0161249	-0.0749645	-0.0174634	0.0910895	0.104102	0.078267	0.0321828	0.00241636	0.0397342	0.225364
O75643	SNRNP200	U5 small nuclear ribonucleoprotein 200 kDa helicase OS=Homo sapiens OX=9606 GN=SNRNP200 PE=1 SV=2	NA	-0.55572	-0.3322	-0.239112	-0.0155918	-0.571312	-0.22352	2.14736	1.35473	1.17508	0.00103347	2.5093	0.911693
O75663	TIPRL	TIP41-like protein OS=Homo sapiens OX=9606 GN=TIPRL PE=1 SV=2	NA	-0.0548622	-0.151476	0.131733	0.0351197	-0.0197425	0.0966138	0.124649	0.811082	0.446481	0.00241636	0.0408694	0.343898
O75688	PPM1B	Protein phosphatase 1B OS=Homo sapiens OX=9606 GN=PPM1B PE=1 SV=1	NA	0.133391	-0.0822791	0.196959	-0.0187108	0.11468	0.21567	0.10566	0.197177	0.359333	0.000822304	0.166115	0.284759
O75691	UTP20	Small subunit processome component 20 homolog OS=Homo sapiens OX=9606 GN=UTP20 PE=1 SV=3	NA	-1.44061	-0.213683	-0.998078	0.228851	-1.21176	-1.22693	3.76664	0.407258	2.78127	0.0214154	3.41087	3.15298
O75694	NUP155	Nuclear pore complex protein Nup155 OS=Homo sapiens OX=9606 GN=NUP155 PE=1 SV=1	NA	-0.976639	-0.356954	-0.010178	0.609507	-0.367132	-0.619685	0.64779	0.91988	0.0123936	0.00241636	0.772923	0.420851
O75717	WDHD1	WD repeat and HMG-box DNA-binding protein 1 OS=Homo sapiens OX=9606 GN=WDHD1 PE=1 SV=1	NA	0.113945	-0.0581117	0.0317074	-0.140349	-0.0264042	0.172057	0.190527	0.198935	0.0678493	0.00241636	0.041856	0.492382
O75718	CRTAP	Cartilage-associated protein OS=Homo sapiens OX=9606 GN=CRTAP PE=1 SV=1	NA	0.0845798	-0.469221	-0.123977	-0.677778	-0.593198	0.553801	0.0737011	0.558232	0.0960634	0.069342	0.824314	0.83531
O75746	SLC25A12	Calcium-binding mitochondrial carrier protein Aralar1 OS=Homo sapiens OX=9606 GN=SLC25A12 PE=1 SV=2	NA	-1.09491	-0.980862	0.0895338	0.20358	-0.891328	-0.114047	2.84428	2.3524	0.084349	0.00241636	1.88678	0.163553
O75792	RNASEH2A	Ribonuclease H2 subunit A OS=Homo sapiens OX=9606 GN=RNASEH2A PE=1 SV=2	NA	0.019084	-0.0969686	0.0402964	-0.0757563	-0.0566723	0.116053	0.0421206	0.382257	0.1053	0.00241636	0.163767	0.482991
O75794	CDC123	Cell division cycle protein 123 homolog OS=Homo sapiens OX=9606 GN=CDC123 PE=1 SV=1	NA	-0.0401704	-0.247175	0.0827011	-0.124303	-0.164474	0.207004	0.0756501	0.919163	0.239613	0.00241636	0.751676	0.696666
O75817	POP7	Ribonuclease P protein subunit p20 OS=Homo sapiens OX=9606 GN=POP7 PE=1 SV=2	NA	-0.267773	-0.0516246	-0.0639901	0.152159	-0.115615	-0.216149	1.14565	0.168692	0.151024	0.00241636	0.317345	0.897884
O75821	EIF3G	Eukaryotic translation initiation factor 3 subunit G OS=Homo sapiens OX=9606 GN=EIF3G PE=1 SV=2	NA	0.0319535	-0.059372	0.0726402	-0.0186853	0.0132682	0.0913255	0.053536	0.17275	0.295091	0.00103347	0.0246517	0.373837
O75822	EIF3J	Eukaryotic translation initiation factor 3 subunit J OS=Homo sapiens OX=9606 GN=EIF3J PE=1 SV=2	NA	0.16055	0.0709471	0.0471065	-0.0424967	0.118054	0.0896032	0.658096	0.363626	0.137246	0.00241636	0.469099	0.354281
O75832	PSMD10	26S proteasome non-ATPase regulatory subunit 10 OS=Homo sapiens OX=9606 GN=PSMD10 PE=1 SV=1	NA	0.186884	0.017134	0.031843	-0.137907	0.048977	0.16975	0.263086	0.019528	0.0510548	0.00241636	0.0555057	0.431577
O75844	ZMPSTE24	CAAX prenyl protease 1 homolog OS=Homo sapiens OX=9606 GN=ZMPSTE24 PE=1 SV=2	NA	-0.559902	-0.609081	0.0231277	-0.0260514	-0.585953	0.0491791	2.38284	1.79583	0.0305413	0.00103347	2.04323	0.101015
O75874	IDH1	Isocitrate dehydrogenase [NADP] cytoplasmic OS=Homo sapiens OX=9606 GN=IDH1 PE=1 SV=2	NA	0.0265247	-0.205649	0.189074	-0.0430996	-0.0165749	0.232174	0.048163	1.23177	1.02247	0.00241636	0.0420616	0.910928
O75879	GATB	Glutamyl-tRNA(Gln) amidotransferase subunit B, mitochondrial OS=Homo sapiens OX=9606 GN=GATB PE=1 SV=1	NA	-0.491019	-0.674126	0.202154	0.019047	-0.471972	0.183107	1.24886	1.19577	0.275755	0.000822304	1.20655	0.288268
O75880	SCO1	Protein SCO1 homolog, mitochondrial OS=Homo sapiens OX=9606 GN=SCO1 PE=1 SV=1	NA	-0.0528051	-0.204699	0.0105452	-0.141349	-0.194154	0.151894	0.0536166	0.474775	0.0118158	0.00241636	0.312309	0.278854
O75886	STAM2	Signal transducing adapter molecule 2 OS=Homo sapiens OX=9606 GN=STAM2 PE=1 SV=1	NA	0.0856201	0.368939	0.180251	0.463571	0.549191	-0.283319	0.0353031	0.167524	0.0386126	0.00241636	0.201663	0.104166
O75909	CCNK	Cyclin-K OS=Homo sapiens OX=9606 GN=CCNK PE=1 SV=2	NA	0.152181	0.0624036	-0.0359481	-0.125725	0.0264554	0.0897773	0.309886	0.265358	0.0525366	0.00241636	0.0334862	0.228251
O75915	ARL6IP5	PRA1 family protein 3 OS=Homo sapiens OX=9606 GN=ARL6IP5 PE=1 SV=1	NA	-0.135335	-0.330702	0.17656	-0.0188074	-0.154142	0.195367	0.313619	1.40926	0.569481	0.00103347	0.741498	0.527201
O75934	BCAS2	Pre-mRNA-splicing factor SPF27 OS=Homo sapiens OX=9606 GN=BCAS2 PE=1 SV=1	NA	-0.423304	-0.218469	-0.186223	0.0186124	-0.404692	-0.204835	1.60332	0.895073	0.654969	0.00103347	1.65386	0.77181
O75935	DCTN3	Dynactin subunit 3 OS=Homo sapiens OX=9606 GN=DCTN3 PE=1 SV=1	NA	-0.00375921	-0.219587	0.128657	-0.0871706	-0.0909298	0.215828	0.00266582	0.562695	0.159689	0.00241636	0.0911512	0.492964
O75937	DNAJC8	DnaJ homolog subfamily C member 8 OS=Homo sapiens OX=9606 GN=DNAJC8 PE=1 SV=2	NA	0.0130326	-0.111032	0.0815653	-0.042499	-0.0294663	0.124064	0.0233722	0.397594	0.202307	0.00241636	0.0561305	0.482991
O75940	SMNDC1	Survival of motor neuron-related-splicing factor 30 OS=Homo sapiens OX=9606 GN=SMNDC1 PE=1 SV=1	NA	-0.0873794	-0.0534136	-0.311296	-0.277331	-0.36471	-0.0339658	0.0991725	0.0782181	0.924457	0.0214154	0.870111	0.0644503
O75947	ATP5PD	ATP synthase subunit d, mitochondrial OS=Homo sapiens OX=9606 GN=ATP5PD PE=1 SV=3	NA	-0.197346	-0.271827	0.0261999	-0.0482814	-0.245628	0.0744813	0.839159	1.3751	0.0515594	0.00241636	0.811723	0.358137
O75955	FLOT1	Flotillin-1 OS=Homo sapiens OX=9606 GN=FLOT1 PE=1 SV=3	NA	-0.38507	-0.146183	-0.0189738	0.219914	-0.165156	-0.238887	1.11769	0.265358	0.0214412	0.00241636	0.266121	0.65608
O75964	ATP5MG	ATP synthase subunit g, mitochondrial OS=Homo sapiens OX=9606 GN=ATP5MG PE=1 SV=3	NA	-0.238802	-0.360914	0.0479265	-0.0741851	-0.312987	0.122112	0.672242	1.23177	0.0972198	0.00241636	0.957833	0.388264
O75976	CPD	Carboxypeptidase D OS=Homo sapiens OX=9606 GN=CPD PE=1 SV=2	NA	0.076827	-0.243398	0.196593	-0.123632	-0.0468047	0.320225	0.129905	0.844546	0.618105	0.00241636	0.0831214	1.12651
O76003	GLRX3	Glutaredoxin-3 OS=Homo sapiens OX=9606 GN=GLRX3 PE=1 SV=2	NA	-0.0498846	-0.195851	0.101077	-0.0448893	-0.0947739	0.145966	0.117178	1.29414	0.537069	0.00241636	0.523703	0.632209
O76021	RSL1D1	Ribosomal L1 domain-containing protein 1 OS=Homo sapiens OX=9606 GN=RSL1D1 PE=1 SV=3	NA	-0.791594	1.43985	-1.97662	0.254826	-0.536768	-2.23145	0.656817	2.67306	1.78574	0.00241636	0.394143	2.13098
O76031	CLPX	ATP-dependent Clp protease ATP-binding subunit clpX-like, mitochondrial OS=Homo sapiens OX=9606 GN=CLPX PE=1 SV=2	NA	-0.0469688	-0.160255	0.0548099	-0.0584762	-0.105445	0.113286	0.107733	0.870729	0.182008	0.00241636	0.482425	0.427624
O76080	ZFAND5	AN1-type zinc finger protein 5 OS=Homo sapiens OX=9606 GN=ZFAND5 PE=1 SV=1	NA	0.195063	-0.0093413	0.711366	0.506961	0.702024	0.204404	0.219965	0.00789794	0.360466	0.00241636	0.371727	0.303635
O76094	SRP72	Signal recognition particle subunit SRP72 OS=Homo sapiens OX=9606 GN=SRP72 PE=1 SV=3	NA	0.136391	-0.172552	0.192958	-0.115985	0.0204064	0.308943	0.446541	0.793401	1.22548	0.00241636	0.0420616	1.96658
O94760	DDAH1	N(G),N(G)-dimethylarginine dimethylaminohydrolase 1 OS=Homo sapiens OX=9606 GN=DDAH1 PE=1 SV=3	NA	-0.103948	-0.22495	0.147451	0.0264484	-0.0774992	0.121002	0.198295	0.758689	0.732538	0.00241636	0.158897	0.647106
O94761	RECQL4	ATP-dependent DNA helicase Q4 OS=Homo sapiens OX=9606 GN=RECQL4 PE=1 SV=2	NA	-0.171148	-0.116028	0.31483	0.36995	0.198803	-0.0551199	0.136996	0.164082	0.0919391	0.00241636	0.0458219	0.0668098
O94763	URI1	Unconventional prefoldin RPB5 interactor 1 OS=Homo sapiens OX=9606 GN=URI1 PE=1 SV=3	NA	0.370456	0.194519	-0.183704	-0.359642	0.0108144	0.175937	1.09788	0.575214	0.342273	0.0214154	0.0169643	0.362372
O94766	B3GAT3	Galactosylgalactosylxylosylprotein 3-beta-glucuronosyltransferase 3 OS=Homo sapiens OX=9606 GN=B3GAT3 PE=1 SV=2	NA	0.0215185	-0.441472	0.310994	-0.151996	-0.130477	0.46299	0.0166853	0.50592	0.2543	0.00241636	0.148985	0.503353
O94776	MTA2	Metastasis-associated protein MTA2 OS=Homo sapiens OX=9606 GN=MTA2 PE=1 SV=1	NA	-0.0790408	-0.00624773	-0.0841183	-0.0113252	-0.090366	-0.0727931	0.151949	0.0134817	0.283997	0.000822304	0.283484	0.203465
O94782	USP1	Ubiquitin carboxyl-terminal hydrolase 1 OS=Homo sapiens OX=9606 GN=USP1 PE=1 SV=1	NA	0.20712	-0.0801765	0.16047	-0.126827	0.0802931	0.287296	0.0953271	0.115868	0.252446	0.00224569	0.0868757	0.206616
O94788	ALDH1A2	Retinal dehydrogenase 2 OS=Homo sapiens OX=9606 GN=ALDH1A2 PE=1 SV=3	NA	-0.0988598	-0.315359	0.268825	0.0523251	-0.0465347	0.2165	0.211595	1.0654	0.638014	0.00241636	0.0682011	0.721376
O94804	STK10	Serine/threonine-protein kinase 10 OS=Homo sapiens OX=9606 GN=STK10 PE=1 SV=1	NA	0.129028	-0.0111655	0.212263	0.0720701	0.201098	0.140193	0.372453	0.0206021	0.631247	0.00241636	1.17325	0.360733
O94826	TOMM70	Mitochondrial import receptor subunit TOM70 OS=Homo sapiens OX=9606 GN=TOMM70 PE=1 SV=1	NA	3.38571e-05	-0.26422	0.185221	-0.0790327	-0.0789989	0.264254	0.000126383	0.886312	0.488763	0.00241636	0.232211	0.884684
O94842	TOX4	TOX high mobility group box family member 4 OS=Homo sapiens OX=9606 GN=TOX4 PE=1 SV=1	NA	-0.364197	-0.263978	-0.155036	-0.0548172	-0.419014	-0.100219	1.71391	1.20142	0.46053	0.00241636	1.84566	0.347303
O94864	SUPT7L	STAGA complex 65 subunit gamma OS=Homo sapiens OX=9606 GN=SUPT7L PE=1 SV=1	NA	-0.517725	-0.473579	-0.0269674	0.0171791	-0.500546	-0.0441465	0.523967	0.563598	0.0365688	0.000822304	0.542155	0.0726911
O94874	UFL1	E3 UFM1-protein ligase 1 OS=Homo sapiens OX=9606 GN=UFL1 PE=1 SV=2	NA	-0.0181262	-0.463766	0.196154	-0.249486	-0.267612	0.44564	0.020024	1.99141	0.665438	0.00241636	1.33516	1.18251
O94888	UBXN7	UBX domain-containing protein 7 OS=Homo sapiens OX=9606 GN=UBXN7 PE=1 SV=2	NA	-0.154749	-0.5399	0.600491	0.215339	0.0605904	0.385151	0.053823	0.61318	0.513303	0.00241636	0.0237205	0.296203
O94901	SUN1	SUN domain-containing protein 1 OS=Homo sapiens OX=9606 GN=SUN1 PE=1 SV=3	NA	-3.24431	-2.55234	-0.0604267	0.631536	-2.61277	-0.691963	1.66144	1.35394	0.0231432	0.00241636	1.19952	0.601872
O94903	PLPBP	Pyridoxal phosphate homeostasis protein OS=Homo sapiens OX=9606 GN=PLPBP PE=1 SV=1	NA	0.00403017	-0.140101	0.0866766	-0.0574541	-0.0534239	0.144131	0.00215132	0.254318	0.0771401	0.00103347	0.0420616	0.187193
O94905	ERLIN2	Erlin-2 OS=Homo sapiens OX=9606 GN=ERLIN2 PE=1 SV=1	NA	-0.504484	-0.442246	-0.157453	-0.0952143	-0.599699	-0.0622385	2.06794	1.47243	0.483575	0.00241636	2.63699	0.16618
O94906	PRPF6	Pre-mRNA-processing factor 6 OS=Homo sapiens OX=9606 GN=PRPF6 PE=1 SV=1	NA	-0.369468	-0.36702	0.00323193	0.00567997	-0.363788	-0.00244805	1.06019	1.31227	0.00817625	0.000822304	1.26423	0.00549944
O94916	NFAT5	Nuclear factor of activated T-cells 5 OS=Homo sapiens OX=9606 GN=NFAT5 PE=1 SV=1	NA	0.335956	1.29755	-0.261002	0.700594	1.03655	-0.961597	0.155491	0.381558	0.0343081	0.00241636	0.280486	0.246625
O94925	GLS	Glutaminase kidney isoform, mitochondrial OS=Homo sapiens OX=9606 GN=GLS PE=1 SV=1	NA	-0.024145	-0.155251	-0.0221643	-0.15327	-0.177415	0.131106	0.0251022	0.489243	0.0503826	0.00241636	0.452153	0.367669
O94966	USP19	Ubiquitin carboxyl-terminal hydrolase 19 OS=Homo sapiens OX=9606 GN=USP19 PE=1 SV=2	NA	0.0141941	-0.0414975	0.069349	0.0136574	0.0278515	0.0556916	0.0224598	0.15693	0.249566	0.000822304	0.072551	0.167641
O94973	AP2A2	AP-2 complex subunit alpha-2 OS=Homo sapiens OX=9606 GN=AP2A2 PE=1 SV=2	NA	-0.112442	-0.14489	0.0224562	-0.00999159	-0.122433	0.0324478	0.142799	0.40583	0.03661	0.000822304	0.236801	0.0540539
O94979	SEC31A	Protein transport protein Sec31A OS=Homo sapiens OX=9606 GN=SEC31A PE=1 SV=3	NA	0.0457651	-0.0853596	0.200043	0.0689187	0.114684	0.131125	0.076728	0.247918	0.648601	0.00241636	0.29986	0.427624
O94992	HEXIM1	Protein HEXIM1 OS=Homo sapiens OX=9606 GN=HEXIM1 PE=1 SV=1	NA	0.191611	-0.0567572	0.11223	-0.136138	0.055473	0.248368	0.338486	0.115621	0.126892	0.00241636	0.0458219	0.638518
O95071	UBR5	E3 ubiquitin-protein ligase UBR5 OS=Homo sapiens OX=9606 GN=UBR5 PE=1 SV=2	NA	0.104752	0.144554	-0.0110313	0.0287707	0.133523	-0.039802	0.348309	0.453148	0.0180455	0.00241636	0.517952	0.0957018
O95104	SCAF4	SR-related and CTD-associated factor 4 OS=Homo sapiens OX=9606 GN=SCAF4 PE=1 SV=3	NA	-0.638048	-0.263795	-0.452166	-0.0779135	-0.715961	-0.374253	1.56164	0.70416	1.53396	0.00241636	2.82772	0.797831
O95139	NDUFB6	NADH dehydrogenase [ubiquinone] 1 beta subcomplex subunit 6 OS=Homo sapiens OX=9606 GN=NDUFB6 PE=1 SV=3	NA	-0.47296	-0.616162	0.214768	0.0715664	-0.401394	0.143201	2.18919	2.82295	0.567976	0.00241636	1.41203	0.532954
O95155	UBE4B	Ubiquitin conjugation factor E4 B OS=Homo sapiens OX=9606 GN=UBE4B PE=1 SV=1	NA	0.0819694	-0.0352633	-0.0494601	-0.166693	-0.0847234	0.117233	0.0678428	0.0368304	0.0514365	0.00241636	0.0894258	0.157647
O95159	ZFPL1	Zinc finger protein-like 1 OS=Homo sapiens OX=9606 GN=ZFPL1 PE=1 SV=2	NA	0.121322	-0.424222	0.0544099	-0.491134	-0.369812	0.545544	0.0808627	1.10243	0.102952	0.00241636	1.06191	0.731679
O95163	ELP1	Elongator complex protein 1 OS=Homo sapiens OX=9606 GN=ELP1 PE=1 SV=3	NA	0.286238	-0.336744	0.548211	-0.0747717	0.211466	0.622983	0.185989	0.463779	1.26091	0.00103347	0.17502	0.938638
O95168	NDUFB4	NADH dehydrogenase [ubiquinone] 1 beta subcomplex subunit 4 OS=Homo sapiens OX=9606 GN=NDUFB4 PE=1 SV=3	NA	-0.738963	-0.884276	-0.14679	-0.292103	-1.03107	0.145313	0.693579	1.00178	0.299708	0.00241636	1.15421	0.317766
O95169	NDUFB8	NADH dehydrogenase [ubiquinone] 1 beta subcomplex subunit 8, mitochondrial OS=Homo sapiens OX=9606 GN=NDUFB8 PE=1 SV=1	NA	0.00113621	-0.0536762	0.138738	0.0839257	0.0850619	0.0548124	0.000478884	0.0830578	0.20963	0.00241636	0.125241	0.0611357
O95182	NDUFA7	NADH dehydrogenase [ubiquinone] 1 alpha subcomplex subunit 7 OS=Homo sapiens OX=9606 GN=NDUFA7 PE=1 SV=3	NA	-0.12254	-0.529696	0.276933	-0.130223	-0.252763	0.407156	0.150494	1.30608	0.608224	0.00241636	0.489255	0.983564
O95202	LETM1	Mitochondrial proton/calcium exchanger protein OS=Homo sapiens OX=9606 GN=LETM1 PE=1 SV=1	NA	-0.0323269	-0.0625772	0.0139596	-0.0162907	-0.0486177	0.0302503	0.0625428	0.242352	0.042377	0.00103347	0.140279	0.105363
O95218	ZRANB2	Zinc finger Ran-binding domain-containing protein 2 OS=Homo sapiens OX=9606 GN=ZRANB2 PE=1 SV=2	NA	-1.60678	-0.947964	-0.654071	0.00475007	-1.60203	-0.658821	3.14161	0.406284	0.221612	0.000822304	3.21569	0.261852
O95219	SNX4	Sorting nexin-4 OS=Homo sapiens OX=9606 GN=SNX4 PE=1 SV=1	NA	0.0785102	-0.415874	0.269372	-0.225013	-0.146503	0.494385	0.0855846	1.19584	0.513303	0.00241636	0.229022	1.09075
O95229	ZWINT	ZW10 interactor OS=Homo sapiens OX=9606 GN=ZWINT PE=1 SV=2	NA	-0.103638	-0.186244	0.154446	0.0718397	-0.0317978	0.0826065	0.350357	0.765623	0.510713	0.00241636	0.0675302	0.322552
O95232	LUC7L3	Luc7-like protein 3 OS=Homo sapiens OX=9606 GN=LUC7L3 PE=1 SV=2	NA	-0.302121	-0.0541126	-0.191627	0.0563814	-0.24574	-0.248008	1.10929	0.14495	0.61084	0.00241636	1.06339	0.806477
O95235	KIF20A	Kinesin-like protein KIF20A OS=Homo sapiens OX=9606 GN=KIF20A PE=1 SV=1	NA	-1.34357	-1.20543	-0.577272	-0.439136	-1.7827	-0.138136	1.84476	1.18719	0.318203	0.00241636	1.46973	0.126185
O95239	KIF4A	Chromosome-associated kinesin KIF4A OS=Homo sapiens OX=9606 GN=KIF4A PE=1 SV=3	NA	-0.136063	-0.199235	0.026899	-0.0362739	-0.172336	0.0631729	0.363811	0.790629	0.0598784	0.00241636	1.00874	0.148111
O95249	GOSR1	Golgi SNAP receptor complex member 1 OS=Homo sapiens OX=9606 GN=GOSR1 PE=1 SV=1	NA	0.42431	0.139262	-0.147306	-0.432353	-0.0080437	0.285047	0.947094	0.253819	0.256546	0.0214154	0.00956725	0.632964
O95251	KAT7	Histone acetyltransferase KAT7 OS=Homo sapiens OX=9606 GN=KAT7 PE=1 SV=1	NA	-2.02688	-0.795994	-1.25051	-0.0196238	-2.0465	-1.23088	3.70763	1.39298	2.9732	0.000822304	3.71571	2.94928
O95292	VAPB	Vesicle-associated membrane protein-associated protein B/C OS=Homo sapiens OX=9606 GN=VAPB PE=1 SV=3	NA	-0.149234	-0.112388	0.0304275	0.0672732	-0.0819603	-0.0368458	0.478022	0.38215	0.0539426	0.00241636	0.227676	0.0855229
O95295	SNAPIN	SNARE-associated protein Snapin OS=Homo sapiens OX=9606 GN=SNAPIN PE=1 SV=1	NA	0.207487	0.0605938	-0.0609146	-0.207808	-0.00032084	0.146893	0.823935	0.232722	0.189481	0.0214154	0.000942154	0.561941
O95297	MPZL1	Myelin protein zero-like protein 1 OS=Homo sapiens OX=9606 GN=MPZL1 PE=1 SV=1	NA	-0.478079	-0.531979	0.0773169	0.0234165	-0.454662	0.0539004	0.74805	1.19928	0.107815	0.000822304	1.13884	0.0593024
O95299	NDUFA10	NADH dehydrogenase [ubiquinone] 1 alpha subcomplex subunit 10, mitochondrial OS=Homo sapiens OX=9606 GN=NDUFA10 PE=1 SV=1	NA	-0.470665	-0.565678	-0.04925	-0.144263	-0.614928	0.0950129	0.891482	1.12883	0.0989356	0.00241636	1.3668	0.233739
O95336	PGLS	6-phosphogluconolactonase OS=Homo sapiens OX=9606 GN=PGLS PE=1 SV=2	NA	0.165961	-0.0859416	0.200158	-0.0517451	0.114216	0.251903	0.628567	0.326627	0.6577	0.00241636	0.422303	0.92872
O95340	PAPSS2	Bifunctional 3'-phosphoadenosine 5'-phosphosulfate synthase 2 OS=Homo sapiens OX=9606 GN=PAPSS2 PE=1 SV=2	NA	0.0476212	-0.134844	0.0484524	-0.134013	-0.0863914	0.182465	0.063981	0.367038	0.185876	0.00241636	0.16453	0.876129
O95347	SMC2	Structural maintenance of chromosomes protein 2 OS=Homo sapiens OX=9606 GN=SMC2 PE=1 SV=2	NA	0.0101616	-0.120739	0.111774	-0.0191261	-0.00896457	0.1309	0.0182722	0.613491	0.435445	0.00103347	0.0201986	0.57707
O95352	ATG7	Ubiquitin-like modifier-activating enzyme ATG7 OS=Homo sapiens OX=9606 GN=ATG7 PE=1 SV=1	defense response to virus	-0.170527	-0.170249	-0.102282	-0.102004	-0.272531	-0.000277954	0.189362	0.205031	0.133334	0.00241636	0.491895	0.000267404
O95372	LYPLA2	Acyl-protein thioesterase 2 OS=Homo sapiens OX=9606 GN=LYPLA2 PE=1 SV=1	NA	0.0312438	-0.251827	0.174426	-0.108645	-0.0774008	0.283071	0.0353031	0.823522	0.575129	0.00241636	0.152063	0.815554
O95373	IPO7	Importin-7 OS=Homo sapiens OX=9606 GN=IPO7 PE=1 SV=1	NA	0.0485843	-0.168501	0.110496	-0.106589	-0.0580046	0.217085	0.0858644	0.5521	0.292862	0.00241636	0.102516	0.943761
O95391	SLU7	Pre-mRNA-splicing factor SLU7 OS=Homo sapiens OX=9606 GN=SLU7 PE=1 SV=2	NA	-0.654027	0.898933	-1.23155	0.321409	-0.332618	-1.55296	1.00912	0.214364	0.230665	0.00241636	0.104547	0.415591
O95394	PGM3	Phosphoacetylglucosamine mutase OS=Homo sapiens OX=9606 GN=PGM3 PE=1 SV=1	NA	-0.0489348	-0.246911	0.233777	0.0358006	-0.0131342	0.197976	0.107733	1.17448	0.704513	0.00224569	0.0239551	0.765814
O95400	CD2BP2	CD2 antigen cytoplasmic tail-binding protein 2 OS=Homo sapiens OX=9606 GN=CD2BP2 PE=1 SV=1	NA	0.13221	-0.012066	0.126907	-0.0173689	0.114841	0.144276	0.393849	0.0262708	0.451337	0.00103347	0.435259	0.521004
O95429	BAG4	BAG family molecular chaperone regulator 4 OS=Homo sapiens OX=9606 GN=BAG4 PE=1 SV=1	NA	-0.0960062	-0.0334825	-0.0823336	-0.01981	-0.115816	-0.0625236	0.0664702	0.0137939	0.0285725	0.000822304	0.0634971	0.0274948
O95433	AHSA1	Activator of 90 kDa heat shock protein ATPase homolog 1 OS=Homo sapiens OX=9606 GN=AHSA1 PE=1 SV=1	NA	-0.152617	-0.378263	0.213657	-0.0119889	-0.164606	0.225646	0.440252	2.06682	1.30552	0.000822304	0.811468	0.911693
O95456	PSMG1	Proteasome assembly chaperone 1 OS=Homo sapiens OX=9606 GN=PSMG1 PE=1 SV=1	NA	-0.404191	-0.682061	0.419772	0.141902	-0.262289	0.27787	0.503442	1.06558	0.686435	0.00241636	0.252252	0.632964
O95478	NSA2	Ribosome biogenesis protein NSA2 homolog OS=Homo sapiens OX=9606 GN=NSA2 PE=1 SV=1	NA	-0.856225	0.475675	-1.17589	0.156007	-0.700219	-1.3319	0.554711	0.448021	0.595639	0.00103347	0.285464	1.18067
O95487	SEC24B	Protein transport protein Sec24B OS=Homo sapiens OX=9606 GN=SEC24B PE=1 SV=2	NA	0.00836233	0.112074	-0.0571103	0.0466015	0.0549638	-0.103712	0.00963197	0.234096	0.117922	0.00241636	0.0827469	0.261301
O95551	TDP2	Tyrosyl-DNA phosphodiesterase 2 OS=Homo sapiens OX=9606 GN=TDP2 PE=1 SV=1	NA	-0.0850235	-0.569919	0.240143	-0.244752	-0.329775	0.484895	0.114281	2.10039	0.677628	0.00241636	1.1293	1.2773
O95573	ACSL3	Long-chain-fatty-acid--CoA ligase 3 OS=Homo sapiens OX=9606 GN=ACSL3 PE=1 SV=3	NA	0.0891733	-0.0493327	0.067311	-0.0711951	0.0179782	0.138506	0.188584	0.126074	0.155415	0.00241636	0.0325981	0.429789
O95602	POLR1A	DNA-directed RNA polymerase I subunit RPA1 OS=Homo sapiens OX=9606 GN=POLR1A PE=1 SV=2	NA	-0.869044	-0.33774	-0.505292	0.0260115	-0.843033	-0.531304	3.91809	1.43863	2.48512	0.00241636	4.04791	2.43379
O95628	CNOT4	CCR4-NOT transcription complex subunit 4 OS=Homo sapiens OX=9606 GN=CNOT4 PE=1 SV=3	NA	0.861674	0.524466	0.0901496	-0.247059	0.614615	0.337209	2.43648	0.831173	0.079957	0.00241636	1.8965	0.453907
O95630	STAMBP	STAM-binding protein OS=Homo sapiens OX=9606 GN=STAMBP PE=1 SV=1	NA	0.187866	-0.0914401	0.286255	0.00694851	0.194815	0.279306	0.431165	0.28497	0.638287	0.000822304	0.371811	0.913211
O95639	CPSF4	Cleavage and polyadenylation specificity factor subunit 4 OS=Homo sapiens OX=9606 GN=CPSF4 PE=1 SV=1	NA	-0.417206	-0.351588	-0.514021	-0.448402	-0.865608	-0.0656183	0.674633	0.626906	1.24091	0.0214154	1.70208	0.134695
O95644	NFATC1	Nuclear factor of activated T-cells, cytoplasmic 1 OS=Homo sapiens OX=9606 GN=NFATC1 PE=1 SV=3	NA	-0.122123	-0.192886	0.203976	0.133213	0.0110906	0.0707631	0.26566	0.772336	0.606346	0.00241636	0.0174198	0.21688
O95671	ASMTL	Probable bifunctional dTTP/UTP pyrophosphatase/methyltransferase protein OS=Homo sapiens OX=9606 GN=ASMTL PE=1 SV=3	NA	-0.109322	-0.208953	0.199999	0.100367	-0.00895442	0.0996316	0.351771	0.886736	0.613077	0.00241636	0.0156496	0.417734
O95684	FGFR1OP	FGFR1 oncogene partner OS=Homo sapiens OX=9606 GN=FGFR1OP PE=1 SV=1	NA	0.0474582	0.120727	-0.11546	-0.0421917	0.00526651	-0.0732684	0.0973472	0.514379	0.485802	0.00241636	0.0117306	0.272013
O95707	POP4	Ribonuclease P protein subunit p29 OS=Homo sapiens OX=9606 GN=POP4 PE=1 SV=2	NA	0.108443	-0.197821	-0.381909	-0.688173	-0.57973	0.306264	0.0178446	0.155863	0.21164	0.00241636	0.44406	0.0803941
O95721	SNAP29	Synaptosomal-associated protein 29 OS=Homo sapiens OX=9606 GN=SNAP29 PE=1 SV=1	NA	0.0750987	0.0391611	0.0987481	0.0628106	0.137909	0.0359376	0.21003	0.149699	0.367404	0.00241636	0.570838	0.12982
O95747	OXSR1	Serine/threonine-protein kinase OSR1 OS=Homo sapiens OX=9606 GN=OXSR1 PE=1 SV=1	NA	-0.0929429	-0.158406	0.069036	0.00357317	-0.0893697	0.0654628	0.228845	0.456976	0.135985	0.000822304	0.43574	0.12982
O95757	HSPA4L	Heat shock 70 kDa protein 4L OS=Homo sapiens OX=9606 GN=HSPA4L PE=1 SV=3	NA	0.0257544	-0.11512	0.0872362	-0.0536381	-0.0278837	0.140874	0.0514995	0.573129	0.308956	0.00241636	0.0647919	0.584338
O95758	PTBP3	Polypyrimidine tract-binding protein 3 OS=Homo sapiens OX=9606 GN=PTBP3 PE=1 SV=2	NA	-0.761566	-0.500427	-0.332402	-0.0712633	-0.832829	-0.261139	1.52154	0.740801	0.354352	0.00224569	1.75379	0.306373
O95777	LSM8	U6 snRNA-associated Sm-like protein LSm8 OS=Homo sapiens OX=9606 GN=LSM8 PE=1 SV=3	NA	-0.370186	-0.483489	0.0218013	-0.0915017	-0.461687	0.113303	1.47244	2.48286	0.0676175	0.00241636	2.90849	0.354281
O95782	AP2A1	AP-2 complex subunit alpha-1 OS=Homo sapiens OX=9606 GN=AP2A1 PE=1 SV=3	NA	-0.298771	-0.332563	0.140362	0.10657	-0.192201	0.0337916	1.12243	1.51103	0.537069	0.00241636	0.824561	0.0886104
O95785	WIZ	Protein Wiz OS=Homo sapiens OX=9606 GN=WIZ PE=1 SV=2	NA	-0.841773	-0.270513	-0.545041	0.0262189	-0.815554	-0.571259	1.63356	0.395042	1.46975	0.00103347	1.44954	2.12612
O95793	STAU1	Double-stranded RNA-binding protein Staufen homolog 1 OS=Homo sapiens OX=9606 GN=STAU1 PE=1 SV=2	NA	0.239592	0.203793	-0.219391	-0.25519	-0.015598	0.0357992	0.69483	0.789085	0.780349	0.0214154	0.0367307	0.0702713
O95801	TTC4	Tetratricopeptide repeat protein 4 OS=Homo sapiens OX=9606 GN=TTC4 PE=1 SV=3	defense response to virus	0.110338	-0.104465	0.104856	-0.109947	0.000391158	0.214803	0.305019	0.367038	0.318865	0.00241636	0.000942154	0.897884
O95816	BAG2	BAG family molecular chaperone regulator 2 OS=Homo sapiens OX=9606 GN=BAG2 PE=1 SV=1	NA	0.127289	0.182797	-0.0391123	0.0163958	0.143684	-0.055508	0.520587	0.63417	0.0676175	0.00103347	0.527501	0.140611
O95817	BAG3	BAG family molecular chaperone regulator 3 OS=Homo sapiens OX=9606 GN=BAG3 PE=1 SV=3	NA	0.0353221	-0.0433658	0.102411	0.0237227	0.0590448	0.0786879	0.0761712	0.15211	0.427844	0.00219234	0.193764	0.306162
O95819	MAP4K4	Mitogen-activated protein kinase kinase kinase kinase 4 OS=Homo sapiens OX=9606 GN=MAP4K4 PE=1 SV=2	NA	-0.169092	-0.0723207	-0.000302607	0.096469	-0.0726233	-0.0967716	0.443244	0.252458	0.00106669	0.00241636	0.287709	0.238016
O95831	AIFM1	Apoptosis-inducing factor 1, mitochondrial OS=Homo sapiens OX=9606 GN=AIFM1 PE=1 SV=1	NA	0.00333868	-0.0806257	0.0969028	0.0129384	0.0162771	0.0839644	0.00556979	0.413352	0.509098	0.00103347	0.0407437	0.381728
O95861	BPNT1	3'(2'),5'-bisphosphate nucleotidase 1 OS=Homo sapiens OX=9606 GN=BPNT1 PE=1 SV=1	NA	-0.000874789	-0.263706	0.117736	-0.145095	-0.14597	0.262831	0.000608766	0.876454	0.261031	0.00241636	0.24623	1.07703
O95865	DDAH2	N(G),N(G)-dimethylarginine dimethylaminohydrolase 2 OS=Homo sapiens OX=9606 GN=DDAH2 PE=1 SV=1	NA	0.0961172	-0.250504	0.344977	-0.00164413	0.0944731	0.346622	0.0617673	0.280047	0.587594	0.000822304	0.0582161	1.0182
O95881	TXNDC12	Thioredoxin domain-containing protein 12 OS=Homo sapiens OX=9606 GN=TXNDC12 PE=1 SV=1	NA	0.0127195	-0.175653	0.170168	-0.018205	-0.00548552	0.188373	0.0251022	0.77733	0.518782	0.00103347	0.0112839	0.790171
O95905	ECD	Protein ecdysoneless homolog OS=Homo sapiens OX=9606 GN=ECD PE=1 SV=1	NA	-0.0734185	-0.271809	0.0809388	-0.117452	-0.19087	0.198391	0.197824	1.35206	0.281847	0.00241636	0.857977	0.925421
O95926	SYF2	Pre-mRNA-splicing factor SYF2 OS=Homo sapiens OX=9606 GN=SYF2 PE=1 SV=1	NA	-1.61318	-0.592633	-1.09893	-0.0783803	-1.69156	-1.02055	0.81413	0.260039	1.33489	0.00103347	0.998818	0.93507
O95983	MBD3	Methyl-CpG-binding domain protein 3 OS=Homo sapiens OX=9606 GN=MBD3 PE=1 SV=1	NA	-0.112848	0.0651892	-0.132385	0.0456524	-0.0671957	-0.178037	0.363811	0.197586	0.422814	0.00241636	0.194731	0.702068
O95999	BCL10	B-cell lymphoma/leukemia 10 OS=Homo sapiens OX=9606 GN=BCL10 PE=1 SV=1	NA	0.0550135	-0.0563484	-0.0515865	-0.162948	-0.107935	0.111362	0.035701	0.0490726	0.0882845	0.00241636	0.0940695	0.202501
O96000	NDUFB10	NADH dehydrogenase [ubiquinone] 1 beta subcomplex subunit 10 OS=Homo sapiens OX=9606 GN=NDUFB10 PE=1 SV=3	NA	-0.350712	-0.421543	0.140343	0.0695116	-0.2812	0.0708315	1.78539	2.02042	0.517646	0.00241636	1.43436	0.25878
O96005	CLPTM1	Cleft lip and palate transmembrane protein 1 OS=Homo sapiens OX=9606 GN=CLPTM1 PE=1 SV=1	NA	0.115201	-0.240227	0.0686675	-0.28676	-0.171559	0.355427	0.229914	0.821474	0.186518	0.0214154	0.486155	1.36661
O96007	MOCS2	Molybdopterin synthase catalytic subunit OS=Homo sapiens OX=9606 GN=MOCS2 PE=1 SV=1	NA	-0.0683143	-0.143922	0.174141	0.0985327	0.0302184	0.0756081	0.067476	0.278845	0.365414	0.00241636	0.0297089	0.165442
O96008	TOMM40	Mitochondrial import receptor subunit TOM40 homolog OS=Homo sapiens OX=9606 GN=TOMM40 PE=1 SV=1	NA	-0.608803	-0.32564	-0.22446	0.0587025	-0.5501	-0.283163	1.84774	1.0045	0.473535	0.00241636	1.51271	0.81203
O96013	PAK4	Serine/threonine-protein kinase PAK 4 OS=Homo sapiens OX=9606 GN=PAK4 PE=1 SV=1	NA	0.163727	-0.160369	0.313623	-0.0104734	0.153254	0.324096	0.535064	0.715931	1.06044	0.000822304	0.471012	1.25286
O96017	CHEK2	Serine/threonine-protein kinase Chk2 OS=Homo sapiens OX=9606 GN=CHEK2 PE=1 SV=1	NA	-0.151012	-0.236064	0.121932	0.03688	-0.114132	0.0850522	0.10018	0.243706	0.138296	0.00103347	0.068333	0.158614
O96019	ACTL6A	Actin-like protein 6A OS=Homo sapiens OX=9606 GN=ACTL6A PE=1 SV=1	NA	-0.810199	-0.410907	-0.371188	0.0281037	-0.782095	-0.399292	1.5544	0.678305	0.984678	0.00103347	1.53576	1.09075
P00167	CYB5A	Cytochrome b5 OS=Homo sapiens OX=9606 GN=CYB5A PE=1 SV=2	NA	0.00922413	-0.406268	0.273862	-0.14163	-0.132406	0.415492	0.00556979	0.757372	0.544456	0.00241636	0.136453	0.904878
P00338	LDHA	L-lactate dehydrogenase A chain OS=Homo sapiens OX=9606 GN=LDHA PE=1 SV=2	NA	-0.0364416	-0.302158	0.298056	0.0323394	-0.00410217	0.265716	0.05173	1.22769	1.34361	0.00136168	0.00824889	0.897884
P00367	GLUD1	Glutamate dehydrogenase 1, mitochondrial OS=Homo sapiens OX=9606 GN=GLUD1 PE=1 SV=2	NA	0.138851	0.00380389	0.0528654	-0.0821815	0.0566693	0.135047	0.373232	0.00637599	0.135875	0.00241636	0.116306	0.543289
P00374	DHFR	Dihydrofolate reductase OS=Homo sapiens OX=9606 GN=DHFR PE=1 SV=2	NA	0.0286716	-0.190715	0.166514	-0.0528728	-0.0242012	0.219386	0.0690511	1.11113	0.602405	0.00241636	0.0458219	1.26955
P00387	CYB5R3	NADH-cytochrome b5 reductase 3 OS=Homo sapiens OX=9606 GN=CYB5R3 PE=1 SV=3	NA	-0.383606	-0.414217	0.0966017	0.0659905	-0.317615	0.0306111	0.679391	0.965012	0.184647	0.00241636	0.651516	0.0484992
P00390	GSR	Glutathione reductase, mitochondrial OS=Homo sapiens OX=9606 GN=GSR PE=1 SV=2	NA	-0.083067	-0.301962	0.13761	-0.0812845	-0.164352	0.218895	0.189362	1.26338	0.408246	0.00241636	0.431371	1.1209
P00403	MT-CO2	Cytochrome c oxidase subunit 2 OS=Homo sapiens OX=9606 GN=MT-CO2 PE=1 SV=1	NA	-1.02432	-1.08072	-0.174767	-0.231168	-1.25549	0.0564009	2.34136	2.22716	0.139177	0.00241636	2.02756	0.061489
P00441	SOD1	Superoxide dismutase [Cu-Zn] OS=Homo sapiens OX=9606 GN=SOD1 PE=1 SV=2	NA	0.334372	0.0443177	0.137294	-0.152761	0.181611	0.290055	0.883857	0.182473	0.57284	0.00241636	0.826534	0.798277
P00491	PNP	Purine nucleoside phosphorylase OS=Homo sapiens OX=9606 GN=PNP PE=1 SV=2	NA	-0.050014	-0.197668	0.143698	-0.00395563	-0.0539697	0.147654	0.0833902	0.595487	0.224772	0.000822304	0.0634971	0.414695
P00492	HPRT1	Hypoxanthine-guanine phosphoribosyltransferase OS=Homo sapiens OX=9606 GN=HPRT1 PE=1 SV=2	NA	0.0678562	-0.176578	0.176802	-0.067632	0.000224147	0.244434	0.14335	0.806659	0.584101	0.00241636	0.000547106	1.07423
P00505	GOT2	Aspartate aminotransferase, mitochondrial OS=Homo sapiens OX=9606 GN=GOT2 PE=1 SV=3	NA	0.0372787	-0.0971425	0.181803	0.0473817	0.0846604	0.134421	0.0402237	0.197177	0.450984	0.00241636	0.104572	0.455908
P00558	PGK1	Phosphoglycerate kinase 1 OS=Homo sapiens OX=9606 GN=PGK1 PE=1 SV=3	NA	-0.0264374	-0.141827	0.107007	-0.00838329	-0.0348207	0.11539	0.0630553	0.897085	0.556855	0.000822304	0.124626	0.573109
P00568	AK1	Adenylate kinase isoenzyme 1 OS=Homo sapiens OX=9606 GN=AK1 PE=1 SV=3	NA	0.0477239	-0.0766422	0.163776	0.0394103	0.0871342	0.124366	0.0985621	0.355177	0.632623	0.00241636	0.250751	0.519723
P00813	ADA	Adenosine deaminase OS=Homo sapiens OX=9606 GN=ADA PE=1 SV=3	NA	0.0896717	-0.238219	0.0306959	-0.297195	-0.207523	0.327891	0.0596446	0.251363	0.0208168	0.00241636	0.389543	0.295741
P00918	CA2	Carbonic anhydrase 2 OS=Homo sapiens OX=9606 GN=CA2 PE=1 SV=2	NA	0.0924208	-0.00694495	0.130631	0.0312657	0.123686	0.0993657	0.205525	0.0170247	0.544074	0.00224569	0.469336	0.335029
P00966	ASS1	Argininosuccinate synthase OS=Homo sapiens OX=9606 GN=ASS1 PE=1 SV=2	NA	0.178509	-0.456295	0.32874	-0.306063	-0.127554	0.634804	0.25129	1.12883	0.879941	0.00241636	0.16296	2.44422
P01111	NRAS	GTPase NRas OS=Homo sapiens OX=9606 GN=NRAS PE=1 SV=1	NA	-0.100226	-0.171121	0.0706117	-0.00028294	-0.100509	0.0708946	0.151598	0.525565	0.157545	0.000581931	0.340381	0.12678
P01116	KRAS	GTPase KRas OS=Homo sapiens OX=9606 GN=KRAS PE=1 SV=1	NA	-0.494307	-0.55473	0.393554	0.33313	-0.161176	0.0604236	0.334121	0.508004	0.33971	0.00241636	0.0694203	0.0611357
P01889	HLA-B	HLA class I histocompatibility antigen, B alpha chain OS=Homo sapiens OX=9606 GN=HLA-B PE=1 SV=3	NA	-0.265343	-0.255604	0.713318	0.723057	0.457714	-0.00973888	0.342495	0.23377	0.605056	0.0214154	0.493896	0.00643061
P02545	LMNA	Prelamin-A/C OS=Homo sapiens OX=9606 GN=LMNA PE=1 SV=1	NA	-1.68596	-1.38819	-0.246279	0.0514908	-1.63447	-0.29777	4.82635	3.74896	0.749554	0.00241636	4.91371	0.944086
P02786	TFRC	Transferrin receptor protein 1 OS=Homo sapiens OX=9606 GN=TFRC PE=1 SV=2	NA	-0.0360044	-0.13594	0.047762	-0.052174	-0.0881784	0.0999359	0.0575425	0.707566	0.165279	0.00241636	0.355556	0.281706
P02794	FTH1	Ferritin heavy chain OS=Homo sapiens OX=9606 GN=FTH1 PE=1 SV=2	NA	1.66923	-0.235918	1.02441	-0.880741	0.78849	1.90515	0.494388	0.0722903	0.33971	0.00241636	0.223043	0.715093
P03928	MT-ATP8	ATP synthase protein 8 OS=Homo sapiens OX=9606 GN=MT-ATP8 PE=1 SV=1	NA	0.0326831	-0.286375	-0.00771446	-0.326773	-0.29409	0.319058	0.0181439	0.372819	0.00635833	0.00241636	0.516439	0.335833
P04040	CAT	Catalase OS=Homo sapiens OX=9606 GN=CAT PE=1 SV=3	NA	-0.00836699	-0.209142	0.173739	-0.0270357	-0.0354027	0.200775	0.0154969	1.08877	0.497485	0.00103347	0.0645366	0.897884
P04049	RAF1	RAF proto-oncogene serine/threonine-protein kinase OS=Homo sapiens OX=9606 GN=RAF1 PE=1 SV=1	NA	-0.148577	-0.105372	0.222195	0.2654	0.116823	-0.0432055	0.129905	0.145414	0.299079	0.00241636	0.0883668	0.0763759
P04062	GBA	Lysosomal acid glucosylceramidase OS=Homo sapiens OX=9606 GN=GBA PE=1 SV=3	NA	-0.246145	-0.674896	0.0947363	-0.334015	-0.580159	0.428751	0.228337	1.2129	0.243305	0.00241636	1.04556	0.937649
P04075	ALDOA	Fructose-bisphosphate aldolase A OS=Homo sapiens OX=9606 GN=ALDOA PE=1 SV=2	NA	0.0171925	-0.126743	0.234432	0.0904964	0.107689	0.143935	0.0251022	0.579466	1.09404	0.00241636	0.378937	0.507744
P04083	ANXA1	Annexin A1 OS=Homo sapiens OX=9606 GN=ANXA1 PE=1 SV=2	NA	-0.823221	-0.118745	-1.05997	-0.355498	-1.17872	-0.704476	1.70535	0.0982155	1.35643	0.00241636	2.16365	0.971971
P04179	SOD2	Superoxide dismutase [Mn], mitochondrial OS=Homo sapiens OX=9606 GN=SOD2 PE=1 SV=3	NA	0.0125046	-0.292867	0.300712	-0.00465943	0.00784517	0.305372	0.0164891	1.54446	0.46583	0.000822304	0.00813302	1.09075
P04181	OAT	Ornithine aminotransferase, mitochondrial OS=Homo sapiens OX=9606 GN=OAT PE=1 SV=1	NA	-0.107835	-0.281316	0.0719874	-0.101494	-0.209328	0.173481	0.151127	0.801422	0.211226	0.00241636	0.46836	0.609502
P04183	TK1	Thymidine kinase, cytosolic OS=Homo sapiens OX=9606 GN=TK1 PE=1 SV=2	NA	-0.15852	-0.253585	0.121902	0.026837	-0.131684	0.0950647	0.370992	1.03762	0.348336	0.00103347	0.456557	0.22924
P04259	KRT6B	Keratin, type II cytoskeletal 6B OS=Homo sapiens OX=9606 GN=KRT6B PE=1 SV=5	NA	0.194762	-0.0125734	-1.22447	-1.4318	-1.23704	0.207335	0.0534784	0.00363965	0.462779	0.00241636	0.491382	0.0804854
P04264	KRT1	Keratin, type II cytoskeletal 1 OS=Homo sapiens OX=9606 GN=KRT1 PE=1 SV=6	NA	0.201619	-0.346061	-0.483568	-1.03125	-0.829629	0.54768	0.0376933	0.108142	0.105286	0.00241636	0.183705	0.182455
P04350	TUBB4A	Tubulin beta-4A chain OS=Homo sapiens OX=9606 GN=TUBB4A PE=1 SV=2	NA	0.196275	0.160697	0.0739051	0.0383264	0.234602	0.0355787	0.544569	0.566622	0.302995	0.00241636	0.860836	0.118291
P04406	GAPDH	Glyceraldehyde-3-phosphate dehydrogenase OS=Homo sapiens OX=9606 GN=GAPDH PE=1 SV=3	NA	0.130454	-0.110417	0.225829	-0.0150428	0.115412	0.240872	0.424784	0.490212	0.949907	0.00103347	0.546716	0.897884
P04632	CAPNS1	Calpain small subunit 1 OS=Homo sapiens OX=9606 GN=CAPNS1 PE=1 SV=1	NA	-1.10324	-1.11184	0.129172	0.120571	-0.982668	0.00860124	2.17293	2.12079	0.269949	0.00241636	1.92423	0.0148732
P04637	TP53	Cellular tumor antigen p53 OS=Homo sapiens OX=9606 GN=TP53 PE=1 SV=4	NA	-0.0492656	-0.144717	0.14063	0.0451785	-0.00408703	0.0954519	0.0907118	0.439177	0.275942	0.00241636	0.00605266	0.282454
P04792	HSPB1	Heat shock protein beta-1 OS=Homo sapiens OX=9606 GN=HSPB1 PE=1 SV=2	NA	-0.081375	-0.270631	0.0993807	-0.0898751	-0.17125	0.189256	0.205851	1.72652	0.388081	0.00241636	0.764214	0.834192
P04818	TYMS	Thymidylate synthase OS=Homo sapiens OX=9606 GN=TYMS PE=1 SV=3	NA	0.143192	0.0574531	0.139413	0.0536738	0.196866	0.0857388	0.326892	0.126021	0.342463	0.00241636	0.699809	0.191951
P04843	RPN1	Dolichyl-diphosphooligosaccharide--protein glycosyltransferase subunit 1 OS=Homo sapiens OX=9606 GN=RPN1 PE=1 SV=1	NA	-0.286634	-0.417342	0.0969642	-0.0337443	-0.320378	0.130708	1.08292	1.95853	0.50594	0.00241636	1.67608	0.544578
P04844	RPN2	Dolichyl-diphosphooligosaccharide--protein glycosyltransferase subunit 2 OS=Homo sapiens OX=9606 GN=RPN2 PE=1 SV=3	NA	-0.423865	-0.563529	0.000634426	-0.139029	-0.562895	0.139664	1.29149	1.83675	0.00159233	0.00241636	1.77691	0.50936
P04899	GNAI2	Guanine nucleotide-binding protein G(i) subunit alpha-2 OS=Homo sapiens OX=9606 GN=GNAI2 PE=1 SV=3	NA	-0.528985	-0.144004	-0.246131	0.138851	-0.390134	-0.384982	1.25769	0.325043	0.2543	0.00241636	0.465905	0.889294
P04920	SLC4A2	Anion exchange protein 2 OS=Homo sapiens OX=9606 GN=SLC4A2 PE=1 SV=4	NA	0.0825165	-0.279007	0.126019	-0.235504	-0.152988	0.361523	0.113172	0.780327	0.444453	0.0214154	0.290698	1.71357
P05023	ATP1A1	Sodium/potassium-transporting ATPase subunit alpha-1 OS=Homo sapiens OX=9606 GN=ATP1A1 PE=1 SV=1	NA	0.00961859	-0.065125	0.000719311	-0.0740243	-0.0644057	0.0747436	0.0158304	0.252552	0.0020389	0.00241636	0.20566	0.305875
P05067	APP	Amyloid-beta precursor protein OS=Homo sapiens OX=9606 GN=APP PE=1 SV=3	NA	-0.154727	-1.40185	0.0977687	-1.14936	-1.30408	1.24713	0.0573476	1.62383	0.0762337	0.0214154	2.05513	0.949135
P05091	ALDH2	Aldehyde dehydrogenase, mitochondrial OS=Homo sapiens OX=9606 GN=ALDH2 PE=1 SV=2	NA	0.0432966	-0.229359	0.145147	-0.127509	-0.0842124	0.272656	0.0801611	1.18753	0.591446	0.00241636	0.249481	1.12939
P05114	HMGN1	Non-histone chromosomal protein HMG-14 OS=Homo sapiens OX=9606 GN=HMGN1 PE=1 SV=3	NA	-2.49356	-1.00808	-1.64137	-0.155895	-2.64945	-1.48548	4.17827	1.92817	3.12683	0.00241636	5.2331	2.37559
P05141	SLC25A5	ADP/ATP translocase 2 OS=Homo sapiens OX=9606 GN=SLC25A5 PE=1 SV=7	NA	-0.459929	-0.553713	0.0403999	-0.0533838	-0.513313	0.0937838	1.39519	1.76381	0.109045	0.00241636	1.69945	0.321763
P05198	EIF2S1	Eukaryotic translation initiation factor 2 subunit 1 OS=Homo sapiens OX=9606 GN=EIF2S1 PE=1 SV=3	NA	-0.166456	-0.25299	0.0100565	-0.0764778	-0.242934	0.0865344	0.402099	0.887261	0.0164478	0.00241636	0.647653	0.290015
P05204	HMGN2	Non-histone chromosomal protein HMG-17 OS=Homo sapiens OX=9606 GN=HMGN2 PE=1 SV=3	NA	-2.63288	-0.987455	-1.56797	0.0774622	-2.55542	-1.64543	4.82923	2.05316	3.454	0.00241636	5.31965	3.17163
P05386	RPLP1	60S acidic ribosomal protein P1 OS=Homo sapiens OX=9606 GN=RPLP1 PE=1 SV=1	NA	0.164882	0.115712	0.0164901	-0.0326797	0.132202	0.0491698	0.34581	0.304257	0.0370027	0.00241636	0.344221	0.124633
P05387	RPLP2	60S acidic ribosomal protein P2 OS=Homo sapiens OX=9606 GN=RPLP2 PE=1 SV=1	NA	0.127601	0.156805	-0.128879	-0.0996749	0.027926	-0.0292043	0.311556	0.549047	0.458605	0.00241636	0.0582161	0.0746491
P05388	RPLP0	60S acidic ribosomal protein P0 OS=Homo sapiens OX=9606 GN=RPLP0 PE=1 SV=1	NA	0.0797508	-0.0262594	0.0383606	-0.0676495	0.0121012	0.10601	0.165611	0.0953825	0.0889888	0.00241636	0.0229254	0.332866
P05423	POLR3D	DNA-directed RNA polymerase III subunit RPC4 OS=Homo sapiens OX=9606 GN=POLR3D PE=1 SV=2	defense response to virus	-0.180749	0.202562	-0.353946	0.0293652	-0.151384	-0.383311	0.298844	0.429394	0.686594	0.00103347	0.291436	0.79131
P05455	SSB	Lupus La protein OS=Homo sapiens OX=9606 GN=SSB PE=1 SV=2	NA	0.0252346	-0.0964065	0.13747	0.0158287	0.0410632	0.121641	0.0522922	0.347268	0.424182	0.00103347	0.130308	0.370055
P05556	ITGB1	Integrin beta-1 OS=Homo sapiens OX=9606 GN=ITGB1 PE=1 SV=2	NA	0.0610893	-0.143155	0.184363	-0.0198819	0.0412074	0.204244	0.148553	0.749202	0.703402	0.00103347	0.099235	0.913211
P05783	KRT18	Keratin, type I cytoskeletal 18 OS=Homo sapiens OX=9606 GN=KRT18 PE=1 SV=2	NA	-0.159255	-0.125869	-0.0157429	0.017643	-0.141612	-0.0333858	0.402099	0.455071	0.0287807	0.000822304	0.559292	0.0639164
P06132	UROD	Uroporphyrinogen decarboxylase OS=Homo sapiens OX=9606 GN=UROD PE=1 SV=2	NA	0.127745	-0.0356563	0.19294	0.0295385	0.157283	0.163401	0.288114	0.0958119	0.706574	0.00136168	0.44406	0.635277
P06280	GLA	Alpha-galactosidase A OS=Homo sapiens OX=9606 GN=GLA PE=1 SV=1	NA	-0.0429385	-0.216531	-0.0968826	-0.270475	-0.313414	0.173593	0.050149	0.506866	0.122036	0.00241636	0.74384	0.284023
P06396	GSN	Gelsolin OS=Homo sapiens OX=9606 GN=GSN PE=1 SV=1	NA	-0.367568	-0.258522	0.0939795	0.203026	-0.164542	-0.109046	1.23534	0.67506	0.128424	0.00241636	0.246706	0.296203
P06400	RB1	Retinoblastoma-associated protein OS=Homo sapiens OX=9606 GN=RB1 PE=1 SV=2	NA	-0.290777	-0.0969343	0.122237	0.31608	0.0253026	-0.193843	0.485762	0.143448	0.149782	0.00241636	0.0199937	0.530044
P06454	PTMA	Prothymosin alpha OS=Homo sapiens OX=9606 GN=PTMA PE=1 SV=2	NA	0.290117	-0.113403	0.318051	-0.0854692	0.204647	0.40352	0.452288	0.140082	0.485802	0.00241636	0.288884	0.77302
P06493	CDK1	Cyclin-dependent kinase 1 OS=Homo sapiens OX=9606 GN=CDK1 PE=1 SV=3	NA	-0.0146706	-0.239203	0.0942261	-0.130306	-0.144977	0.224533	0.0182722	0.747571	0.285583	0.00241636	0.344221	0.923692
P06576	ATP5F1B	ATP synthase subunit beta, mitochondrial OS=Homo sapiens OX=9606 GN=ATP5F1B PE=1 SV=3	NA	-0.0921757	-0.170302	-0.00112409	-0.0792504	-0.171426	0.0781263	0.21	0.894818	0.00289047	0.00241636	0.907748	0.243545
P06730	EIF4E	Eukaryotic translation initiation factor 4E OS=Homo sapiens OX=9606 GN=EIF4E PE=1 SV=2	NA	-0.051074	-0.323476	0.165789	-0.106613	-0.157687	0.272402	0.118244	1.64926	0.770292	0.00241636	0.966496	1.12939
P06733	ENO1	Alpha-enolase OS=Homo sapiens OX=9606 GN=ENO1 PE=1 SV=2	NA	0.0840612	-0.070535	0.129596	-0.0249998	0.0590614	0.154596	0.344704	0.347268	0.514767	0.00241636	0.203976	0.816851
P06737	PYGL	Glycogen phosphorylase, liver form OS=Homo sapiens OX=9606 GN=PYGL PE=1 SV=4	NA	-0.200958	-0.425092	0.0877682	-0.136366	-0.337324	0.224134	0.489332	1.41472	0.177765	0.00241636	0.902503	0.79131
P06744	GPI	Glucose-6-phosphate isomerase OS=Homo sapiens OX=9606 GN=GPI PE=1 SV=4	NA	0.0208436	-0.192802	0.170001	-0.043645	-0.0228014	0.213646	0.0334654	0.668819	0.608523	0.00241636	0.0374796	0.911693
P06748	NPM1	Nucleophosmin OS=Homo sapiens OX=9606 GN=NPM1 PE=1 SV=2	NA	-1.10914	0.419939	-1.45268	0.0763959	-1.03274	-1.52908	3.80461	1.12269	3.12209	0.00241636	3.05389	3.60436
P06753	TPM3	Tropomyosin alpha-3 chain OS=Homo sapiens OX=9606 GN=TPM3 PE=1 SV=2	NA	-0.0778311	-0.177609	0.0113804	-0.0883977	-0.166229	0.099778	0.113172	0.578289	0.0198867	0.00241636	0.435259	0.24495
P06865	HEXA	Beta-hexosaminidase subunit alpha OS=Homo sapiens OX=9606 GN=HEXA PE=1 SV=2	NA	-0.321365	-0.780821	0.256678	-0.202778	-0.524143	0.459456	0.777501	2.05316	0.388013	0.00241636	0.977992	1.42758
P07099	EPHX1	Epoxide hydrolase 1 OS=Homo sapiens OX=9606 GN=EPHX1 PE=1 SV=1	NA	-0.198346	-0.633264	0.0173186	-0.417599	-0.615946	0.434918	0.0866245	0.57318	0.0195319	0.00241636	0.506675	0.621596
P07195	LDHB	L-lactate dehydrogenase B chain OS=Homo sapiens OX=9606 GN=LDHB PE=1 SV=2	NA	-0.00216861	-0.239854	0.20069	-0.0369953	-0.0391639	0.237685	0.00242656	1.07884	0.838431	0.00241636	0.125044	0.794297
P07196	NEFL	Neurofilament light polypeptide OS=Homo sapiens OX=9606 GN=NEFL PE=1 SV=3	NA	0.279932	0.695515	-0.446203	-0.0306201	0.249312	-0.415583	0.83034	2.22774	0.908916	0.00103347	0.400634	1.91444
P07197	NEFM	Neurofilament medium polypeptide OS=Homo sapiens OX=9606 GN=NEFM PE=1 SV=3	NA	0.107938	0.184532	-0.08611	-0.00951652	0.0984218	-0.0765935	0.129905	0.529631	0.136236	0.000822304	0.150396	0.129853
P07203	GPX1	Glutathione peroxidase 1 OS=Homo sapiens OX=9606 GN=GPX1 PE=1 SV=4	NA	0.0821571	0.26172	0.253732	0.433295	0.515452	-0.179563	0.0864507	0.400614	0.278738	0.00241636	0.716885	0.34019
P07237	P4HB	Protein disulfide-isomerase OS=Homo sapiens OX=9606 GN=P4HB PE=1 SV=3	NA	0.0295641	-0.121544	0.159393	0.00828444	0.0378485	0.151108	0.0630553	0.680157	0.751033	0.000822304	0.119541	0.660116
P07305	H1-0	Histone H1.0 OS=Homo sapiens OX=9606 GN=H1-0 PE=1 SV=3	NA	-0.572746	-0.340603	-0.146625	0.0855176	-0.487228	-0.232143	0.561436	0.333439	0.063437	0.00103347	0.349245	0.159381
P07339	CTSD	Cathepsin D OS=Homo sapiens OX=9606 GN=CTSD PE=1 SV=1	NA	-0.15124	-0.358356	0.0845863	-0.12253	-0.27377	0.207116	0.26013	1.31028	0.195696	0.00241636	1.14839	0.459567
P07355	ANXA2	Annexin A2 OS=Homo sapiens OX=9606 GN=ANXA2 PE=1 SV=2	NA	-0.65946	-0.608775	-0.117622	-0.0669374	-0.726398	-0.050685	1.83384	1.66383	0.263006	0.00241636	2.39175	0.0914127
P07437	TUBB	Tubulin beta chain OS=Homo sapiens OX=9606 GN=TUBB PE=1 SV=2	NA	0.0425438	-0.113511	0.0809492	-0.0751053	-0.0325615	0.156055	0.10018	0.535442	0.235937	0.00241636	0.0599256	0.923692
P07602	PSAP	Prosaposin OS=Homo sapiens OX=9606 GN=PSAP PE=1 SV=2	NA	0.379877	-0.139913	0.379885	-0.139905	0.239972	0.519791	1.46638	0.705753	1.59451	0.00241636	1.17464	1.80388
P07686	HEXB	Beta-hexosaminidase subunit beta OS=Homo sapiens OX=9606 GN=HEXB PE=1 SV=3	NA	-0.17772	-0.393402	0.154547	-0.0611352	-0.238855	0.215682	0.388142	1.34802	0.607294	0.00241636	0.807487	0.743449
P07711	CTSL	Cathepsin L1 OS=Homo sapiens OX=9606 GN=CTSL PE=1 SV=2	NA	0.324824	-0.45015	0.405561	-0.369413	-0.0445894	0.774974	0.552175	1.57155	1.12781	0.00241636	0.0630846	1.67981
P07737	PFN1	Profilin-1 OS=Homo sapiens OX=9606 GN=PFN1 PE=1 SV=2	NA	0.138417	-0.0478866	0.0865243	-0.0997797	0.0386378	0.186304	0.570923	0.248801	0.337074	0.00241636	0.112216	0.949482
P07741	APRT	Adenine phosphoribosyltransferase OS=Homo sapiens OX=9606 GN=APRT PE=1 SV=2	NA	-0.039089	-0.330585	0.221277	-0.070219	-0.109308	0.291496	0.0593915	1.45586	0.618869	0.00241636	0.234583	0.969583
P07814	EPRS	Bifunctional glutamate/proline--tRNA ligase OS=Homo sapiens OX=9606 GN=EPRS PE=1 SV=5	NA	-0.0162793	-0.151314	0.100078	-0.034957	-0.0512363	0.135035	0.0368459	0.922178	0.510896	0.00241636	0.176104	0.780498
P07858	CTSB	Cathepsin B OS=Homo sapiens OX=9606 GN=CTSB PE=1 SV=3	NA	-0.275359	-0.634374	0.127899	-0.231116	-0.506475	0.359015	0.44497	1.13404	0.125161	0.00241636	0.911479	0.587146
P07900	HSP90AA1	Heat shock protein HSP 90-alpha OS=Homo sapiens OX=9606 GN=HSP90AA1 PE=1 SV=5	NA	0.109919	0.0100298	0.0728336	-0.0270552	0.0828634	0.0998888	0.263583	0.0180148	0.16054	0.00103347	0.217096	0.267612
P07910	HNRNPC	Heterogeneous nuclear ribonucleoproteins C1/C2 OS=Homo sapiens OX=9606 GN=HNRNPC PE=1 SV=4	NA	-0.498076	0.0260301	-0.489003	0.0351024	-0.462973	-0.524106	1.93446	0.0639833	1.11707	0.00103347	1.19073	1.82117
P07919	UQCRH	Cytochrome b-c1 complex subunit 6, mitochondrial OS=Homo sapiens OX=9606 GN=UQCRH PE=1 SV=2	NA	-0.332839	-0.401096	0.093154	0.0248965	-0.307942	0.0682575	1.06285	1.73469	0.230876	0.00103347	1.12094	0.165778
P07942	LAMB1	Laminin subunit beta-1 OS=Homo sapiens OX=9606 GN=LAMB1 PE=1 SV=2	NA	0.0972866	0.147154	0.0981956	0.148063	0.24535	-0.0498677	0.0850085	0.211404	0.230665	0.00241636	0.379312	0.0869903
P07947	YES1	Tyrosine-protein kinase Yes OS=Homo sapiens OX=9606 GN=YES1 PE=1 SV=3	NA	0.0120633	0.210529	-0.194202	0.00426371	0.016327	-0.198466	0.00947426	0.194388	0.154246	0.000822304	0.0122313	0.202755
P07954	FH	Fumarate hydratase, mitochondrial OS=Homo sapiens OX=9606 GN=FH PE=1 SV=3	NA	0.0572757	-0.0950737	0.0787964	-0.073553	-0.0162774	0.152349	0.130046	0.485229	0.36143	0.00241636	0.0408694	0.677132
P08047	SP1	Transcription factor Sp1 OS=Homo sapiens OX=9606 GN=SP1 PE=1 SV=3	NA	-0.282798	-0.0110951	-0.467377	-0.195674	-0.478472	-0.271703	1.25071	0.0179093	1.41436	0.0177787	2.20519	0.829495
P08133	ANXA6	Annexin A6 OS=Homo sapiens OX=9606 GN=ANXA6 PE=1 SV=3	NA	-0.500926	-0.0674632	-0.530229	-0.096766	-0.597692	-0.433463	1.7107	0.252737	2.28179	0.00241636	2.33649	1.55859
P08195	SLC3A2	4F2 cell-surface antigen heavy chain OS=Homo sapiens OX=9606 GN=SLC3A2 PE=1 SV=3	NA	-0.0468855	-0.132649	0.00115154	-0.0846125	-0.131498	0.085764	0.0908849	0.597665	0.00309157	0.00241636	0.557862	0.33054
P08237	PFKM	ATP-dependent 6-phosphofructokinase, muscle type OS=Homo sapiens OX=9606 GN=PFKM PE=1 SV=2	NA	0.069865	-0.2105	0.141932	-0.138434	-0.0685686	0.280365	0.130046	0.786101	0.620707	0.00241636	0.155939	1.41589
P08238	HSP90AB1	Heat shock protein HSP 90-beta OS=Homo sapiens OX=9606 GN=HSP90AB1 PE=1 SV=4	NA	0.0904272	-0.0749334	0.03626	-0.129101	-0.0386734	0.165361	0.149542	0.190943	0.0816019	0.00241636	0.0694203	0.483257
P08240	SRPRA	Signal recognition particle receptor subunit alpha OS=Homo sapiens OX=9606 GN=SRPRA PE=1 SV=2	NA	0.0685029	0.00166702	0.0467142	-0.0201217	0.0483812	0.0668358	0.167618	0.00366279	0.149782	0.00103347	0.140279	0.246452
P08243	ASNS	Asparagine synthetase [glutamine-hydrolyzing] OS=Homo sapiens OX=9606 GN=ASNS PE=1 SV=4	NA	-0.0454122	-0.410524	0.219285	-0.145826	-0.191239	0.365112	0.0678428	1.30441	0.637493	0.00241636	0.395797	1.91636
P08397	HMBS	Porphobilinogen deaminase OS=Homo sapiens OX=9606 GN=HMBS PE=1 SV=2	NA	0.056753	-0.122931	0.134097	-0.0455872	0.0111658	0.179684	0.154021	0.6629	0.382266	0.00241636	0.0200024	0.885657
P08559	PDHA1	Pyruvate dehydrogenase E1 component subunit alpha, somatic form, mitochondrial OS=Homo sapiens OX=9606 GN=PDHA1 PE=1 SV=3	NA	-0.0976786	-0.230123	0.12414	-0.00830481	-0.105983	0.132445	0.15857	0.744379	0.373523	0.000822304	0.208205	0.456308
P08574	CYC1	Cytochrome c1, heme protein, mitochondrial OS=Homo sapiens OX=9606 GN=CYC1 PE=1 SV=3	NA	-0.550153	-0.237515	-0.317798	-0.00515946	-0.555312	-0.312638	0.416775	0.152857	0.22125	0.000822304	0.541484	0.224748
P08579	SNRPB2	U2 small nuclear ribonucleoprotein B'' OS=Homo sapiens OX=9606 GN=SNRPB2 PE=1 SV=1	NA	-0.255408	-0.285377	0.0578179	0.0278488	-0.227559	0.0299691	0.616328	1.41626	0.149514	0.00103347	0.807638	0.0582808
P08621	SNRNP70	U1 small nuclear ribonucleoprotein 70 kDa OS=Homo sapiens OX=9606 GN=SNRNP70 PE=1 SV=2	NA	-0.408504	-0.345978	-0.0490165	0.013509	-0.394995	-0.0625256	1.50553	1.17672	0.128424	0.00103347	1.61795	0.181636
P08670	VIM	Vimentin OS=Homo sapiens OX=9606 GN=VIM PE=1 SV=4	NA	0.137294	0.256387	-0.0583644	0.0607285	0.198023	-0.119093	0.362655	1.10667	0.136503	0.00241636	0.583926	0.443007
P08708	RPS17	40S ribosomal protein S17 OS=Homo sapiens OX=9606 GN=RPS17 PE=1 SV=2	NA	-0.0189357	-0.118397	-0.0178026	-0.117264	-0.136199	0.099461	0.0343774	0.29893	0.0267861	0.00241636	0.396869	0.246625
P08754	GNAI3	Guanine nucleotide-binding protein G(i) subunit alpha OS=Homo sapiens OX=9606 GN=GNAI3 PE=1 SV=3	NA	-0.501319	-0.47446	-0.0698904	-0.043032	-0.544351	-0.0268584	1.67695	2.40104	0.131706	0.00103347	1.88562	0.0527691
P08758	ANXA5	Annexin A5 OS=Homo sapiens OX=9606 GN=ANXA5 PE=1 SV=2	NA	-0.400935	-0.223225	-0.169753	0.00795709	-0.392978	-0.17771	1.00243	0.820585	0.537069	0.000822304	1.38639	0.443007
P08865	RPSA	40S ribosomal protein SA OS=Homo sapiens OX=9606 GN=RPSA PE=1 SV=4	NA	-0.169665	-0.328625	0.0481345	-0.110826	-0.280491	0.15896	0.598827	1.60767	0.136341	0.00241636	1.25563	0.686437
P09001	MRPL3	39S ribosomal protein L3, mitochondrial OS=Homo sapiens OX=9606 GN=MRPL3 PE=1 SV=1	NA	-0.0247207	-0.141275	0.190377	0.0738227	0.049102	0.116554	0.0228742	0.268636	0.461551	0.00241636	0.0570567	0.303635
P09012	SNRPA	U1 small nuclear ribonucleoprotein A OS=Homo sapiens OX=9606 GN=SNRPA PE=1 SV=3	NA	0.0410823	0.199038	-0.0552734	0.102683	0.143765	-0.157956	0.0251022	0.260872	0.0978328	0.00241636	0.141466	0.335029
P09104	ENO2	Gamma-enolase OS=Homo sapiens OX=9606 GN=ENO2 PE=1 SV=3	NA	-0.338941	-0.634801	1.02363	0.727774	0.388833	0.295861	0.148739	0.472269	0.482082	0.00241636	0.115843	0.317766
P09110	ACAA1	3-ketoacyl-CoA thiolase, peroxisomal OS=Homo sapiens OX=9606 GN=ACAA1 PE=1 SV=2	NA	0.0259807	-0.0752809	0.0587512	-0.0425104	-0.0165297	0.101262	0.0428441	0.164082	0.114762	0.00241636	0.0338244	0.230246
P09132	SRP19	Signal recognition particle 19 kDa protein OS=Homo sapiens OX=9606 GN=SRP19 PE=1 SV=3	NA	0.150568	0.0162634	0.0252674	-0.109037	0.0415308	0.134305	0.384845	0.0644208	0.0889888	0.00241636	0.142145	0.426822
P09211	GSTP1	Glutathione S-transferase P OS=Homo sapiens OX=9606 GN=GSTP1 PE=1 SV=2	NA	0.049314	-0.239554	0.164208	-0.12466	-0.0753461	0.288868	0.0813983	1.08877	0.557223	0.00241636	0.161205	1.18251
P09234	SNRPC	U1 small nuclear ribonucleoprotein C OS=Homo sapiens OX=9606 GN=SNRPC PE=1 SV=1	NA	-0.10124	-0.0109757	-0.0985448	-0.00828092	-0.109521	-0.0902639	0.0737011	0.0134817	0.184101	0.000822304	0.16156	0.101099
P09417	QDPR	Dihydropteridine reductase OS=Homo sapiens OX=9606 GN=QDPR PE=1 SV=2	NA	-0.0123293	-0.247236	0.111885	-0.123022	-0.135351	0.234907	0.0145272	0.924123	0.341839	0.00241636	0.49285	0.621245
P09429	HMGB1	High mobility group protein B1 OS=Homo sapiens OX=9606 GN=HMGB1 PE=1 SV=3	NA	-0.0521727	-0.13965	0.190533	0.103055	0.0508823	0.0874776	0.0757684	0.390114	0.367694	0.00241636	0.0931502	0.157972
P09455	RBP1	Retinol-binding protein 1 OS=Homo sapiens OX=9606 GN=RBP1 PE=1 SV=2	NA	0.508233	0.0512038	0.437492	-0.0195367	0.488696	0.457029	0.748079	0.105233	0.984678	0.000822304	1.21171	0.724414
P09493	TPM1	Tropomyosin alpha-1 chain OS=Homo sapiens OX=9606 GN=TPM1 PE=1 SV=2	NA	-0.895557	-0.525844	-0.259623	0.11009	-0.785467	-0.369713	1.31617	0.585226	0.219287	0.00241636	1.1879	0.386868
P09496	CLTA	Clathrin light chain A OS=Homo sapiens OX=9606 GN=CLTA PE=1 SV=1	NA	0.0780238	-0.0624143	0.210936	0.0704975	0.148521	0.140438	0.187241	0.207537	0.703402	0.00241636	0.63893	0.439782
P09497	CLTB	Clathrin light chain B OS=Homo sapiens OX=9606 GN=CLTB PE=1 SV=1	NA	-0.0168541	-0.210916	0.153283	-0.0407789	-0.0576331	0.194062	0.0131987	0.382257	0.476307	0.00241636	0.0585954	0.677132
P09525	ANXA4	Annexin A4 OS=Homo sapiens OX=9606 GN=ANXA4 PE=1 SV=4	NA	-0.137165	0.0674811	-0.379686	-0.17504	-0.312205	-0.204646	0.263579	0.23052	1.26782	0.00241636	0.978833	0.625948
P09543	CNP	2',3'-cyclic-nucleotide 3'-phosphodiesterase OS=Homo sapiens OX=9606 GN=CNP PE=1 SV=2	NA	-0.0324381	-0.222615	0.148433	-0.0417439	-0.074182	0.190177	0.0424774	0.779348	0.47512	0.00241636	0.152063	0.601313
P09601	HMOX1	Heme oxygenase 1 OS=Homo sapiens OX=9606 GN=HMOX1 PE=1 SV=1	NA	-0.0644039	-0.404637	0.404006	0.0637732	-0.000630759	0.340233	0.089836	1.03037	0.99113	0.00241636	0.000942154	0.897884
P09622	DLD	Dihydrolipoyl dehydrogenase, mitochondrial OS=Homo sapiens OX=9606 GN=DLD PE=1 SV=2	NA	0.0391321	-0.184947	0.255173	0.0310941	0.0702262	0.224079	0.0906326	0.661906	0.741437	0.00241636	0.223334	0.72061
P09651	HNRNPA1	Heterogeneous nuclear ribonucleoprotein A1 OS=Homo sapiens OX=9606 GN=HNRNPA1 PE=1 SV=5	NA	-1.13919	-0.314067	-0.732937	0.092185	-1.047	-0.825122	4.6834	1.32924	3.00622	0.00241636	4.77089	3.15298
P09661	SNRPA1	U2 small nuclear ribonucleoprotein A' OS=Homo sapiens OX=9606 GN=SNRPA1 PE=1 SV=2	NA	-0.0563522	-0.111504	-0.0712474	-0.1264	-0.182752	0.0551522	0.165611	0.537225	0.249408	0.00241636	1.05935	0.198567
P09669	COX6C	Cytochrome c oxidase subunit 6C OS=Homo sapiens OX=9606 GN=COX6C PE=1 SV=2	NA	-0.537788	-0.670574	0.101141	-0.0316454	-0.569433	0.132786	2.40634	2.40104	0.282123	0.00241636	2.46162	0.48604
P09874	PARP1	Poly [ADP-ribose] polymerase 1 OS=Homo sapiens OX=9606 GN=PARP1 PE=1 SV=4	NA	-0.645224	-0.287753	-0.4197	-0.0622283	-0.707452	-0.357471	3.16677	1.1751	1.81061	0.00241636	3.7726	1.37489
P09884	POLA1	DNA polymerase alpha catalytic subunit OS=Homo sapiens OX=9606 GN=POLA1 PE=1 SV=2	NA	-0.100825	-0.118628	0.119403	0.1016	0.000774714	0.0178032	0.211623	0.553339	0.502503	0.00241636	0.00097142	0.0442372
P09936	UCHL1	Ubiquitin carboxyl-terminal hydrolase isozyme L1 OS=Homo sapiens OX=9606 GN=UCHL1 PE=1 SV=2	NA	0.0863279	-0.178314	0.200962	-0.0636799	0.022648	0.264642	0.269005	0.72598	0.638287	0.00241636	0.0461919	1.0613
P09960	LTA4H	Leukotriene A-4 hydrolase OS=Homo sapiens OX=9606 GN=LTA4H PE=1 SV=2	NA	0.0022408	-0.345096	0.319128	-0.0282082	-0.0259674	0.347336	0.00141642	1.10365	1.05443	0.00103347	0.0338456	1.25286
P09972	ALDOC	Fructose-bisphosphate aldolase C OS=Homo sapiens OX=9606 GN=ALDOC PE=1 SV=2	NA	0.0322574	-0.125046	0.128223	-0.0290798	0.00317756	0.157303	0.0421198	0.396723	0.274223	0.00103347	0.00605266	0.335833
P0CG12	DERPC	Decreased expression in renal and prostate cancer protein OS=Homo sapiens OX=9606 GN=DERPC PE=1 SV=1	NA	0.572706	-0.00723146	0.301303	-0.278634	0.294072	0.579937	0.965034	0.00546939	0.147421	0.00241636	0.142612	0.897884
P0CG38	POTEI	POTE ankyrin domain family member I OS=Homo sapiens OX=9606 GN=POTEI PE=3 SV=1	NA	0.807292	0.366336	0.0571973	-0.383759	0.423533	0.440957	0.142312	0.0898944	0.0141761	0.00241636	0.0725465	0.154014
P0DMN0	SULT1A4	Sulfotransferase 1A4 OS=Homo sapiens OX=9606 GN=SULT1A4 PE=1 SV=1	NA	0.199612	-0.688999	0.389015	-0.499596	-0.299984	0.888611	0.15666	1.43069	1.36021	0.0214154	0.487386	1.60734
P0DMV9	HSPA1B	Heat shock 70 kDa protein 1B OS=Homo sapiens OX=9606 GN=HSPA1B PE=1 SV=1	NA	0.0824356	-0.0775168	0.128224	-0.0317286	0.0507069	0.159952	0.305019	0.463361	0.645186	0.00241636	0.190696	0.885389
P0DN79	CBSL	Cystathionine beta-synthase-like protein OS=Homo sapiens OX=9606 GN=CBSL PE=1 SV=1	NA	0.046866	-0.185021	0.146731	-0.0851564	-0.0382904	0.231887	0.101936	0.874877	0.433887	0.00241636	0.0705641	1.03574
P0DPB6	POLR1D	DNA-directed RNA polymerases I and III subunit RPAC2 OS=Homo sapiens OX=9606 GN=POLR1D PE=1 SV=1	NA	-0.0171147	0.00896673	-0.239176	-0.213095	-0.230209	-0.0260814	0.0189279	0.0150908	0.618869	0.00241636	0.486168	0.0645465
P10109	FDX1	Adrenodoxin, mitochondrial OS=Homo sapiens OX=9606 GN=FDX1 PE=1 SV=1	NA	0.279426	0.0690793	0.0452283	-0.165118	0.114308	0.210347	0.416775	0.0894317	0.0678493	0.00241636	0.169276	0.403812
P10155	RO60	60 kDa SS-A/Ro ribonucleoprotein OS=Homo sapiens OX=9606 GN=RO60 PE=1 SV=2	NA	-0.227193	-0.248577	0.0513265	0.0299421	-0.19725	0.0213844	0.898039	0.962273	0.105286	0.00172967	0.537867	0.0658685
P10253	GAA	Lysosomal alpha-glucosidase OS=Homo sapiens OX=9606 GN=GAA PE=1 SV=4	NA	-0.0613373	-0.209977	0.0623658	-0.0862738	-0.147611	0.14864	0.12195	1.10187	0.208569	0.00241636	0.651391	0.523038
P10321	HLA-C	HLA class I histocompatibility antigen, C alpha chain OS=Homo sapiens OX=9606 GN=HLA-C PE=1 SV=3	NA	-0.241945	-0.275869	0.116553	0.0826296	-0.159316	0.0339235	0.482279	1.34429	0.509395	0.00241636	0.735255	0.0574297
P10515	DLAT	Dihydrolipoyllysine-residue acetyltransferase component of pyruvate dehydrogenase complex, mitochondrial OS=Homo sapiens OX=9606 GN=DLAT PE=1 SV=3	NA	-0.0359779	-0.231742	0.125167	-0.0705968	-0.106575	0.195764	0.0750422	1.1681	0.491838	0.00241636	0.382539	0.897884
P10586	PTPRF	Receptor-type tyrosine-protein phosphatase F OS=Homo sapiens OX=9606 GN=PTPRF PE=1 SV=2	NA	0.190864	-0.0780901	-0.210066	-0.47902	-0.288156	0.268954	0.393859	0.142985	0.300031	0.0214154	0.651355	0.526904
P10599	TXN	Thioredoxin OS=Homo sapiens OX=9606 GN=TXN PE=1 SV=3	NA	0.181899	-0.0619145	0.109576	-0.134237	0.0476619	0.243814	0.576955	0.15684	0.196826	0.00241636	0.062356	0.976519
P10606	COX5B	Cytochrome c oxidase subunit 5B, mitochondrial OS=Homo sapiens OX=9606 GN=COX5B PE=1 SV=2	NA	-0.295928	-0.577848	0.0748408	-0.207079	-0.503007	0.28192	1.03614	1.8909	0.13068	0.00241636	1.82079	0.827284
P10620	MGST1	Microsomal glutathione S-transferase 1 OS=Homo sapiens OX=9606 GN=MGST1 PE=1 SV=1	NA	-0.139876	-1.45003	-0.0125963	-1.32275	-1.46262	1.31015	0.0595708	2.25804	0.0141761	0.069342	2.24231	1.44622
P10644	PRKAR1A	cAMP-dependent protein kinase type I-alpha regulatory subunit OS=Homo sapiens OX=9606 GN=PRKAR1A PE=1 SV=1	NA	-0.04557	-0.315321	0.157697	-0.112054	-0.157624	0.269751	0.0962223	1.31947	0.475017	0.00241636	0.594646	0.99685
P10768	ESD	S-formylglutathione hydrolase OS=Homo sapiens OX=9606 GN=ESD PE=1 SV=2	NA	0.0412455	-0.248096	0.269604	-0.0197381	0.0215074	0.289342	0.0489819	0.793401	0.767645	0.000822304	0.030098	0.789721
P10809	HSPD1	60 kDa heat shock protein, mitochondrial OS=Homo sapiens OX=9606 GN=HSPD1 PE=1 SV=2	NA	0.10348	0.0536848	-0.0170637	-0.0668594	0.0366211	0.0497957	0.438349	0.27786	0.0457836	0.00241636	0.10927	0.225364
P11021	HSPA5	Endoplasmic reticulum chaperone BiP OS=Homo sapiens OX=9606 GN=HSPA5 PE=1 SV=2	NA	0.0876201	0.00262776	0.0108056	-0.0741867	0.0134334	0.0849923	0.291055	0.00637599	0.033295	0.00241636	0.0338456	0.416458
P11047	LAMC1	Laminin subunit gamma-1 OS=Homo sapiens OX=9606 GN=LAMC1 PE=1 SV=3	NA	0.118097	-0.058608	0.0666624	-0.110043	0.00805442	0.176705	0.196974	0.11385	0.136959	0.00241636	0.0145266	0.412856
P11142	HSPA8	Heat shock cognate 71 kDa protein OS=Homo sapiens OX=9606 GN=HSPA8 PE=1 SV=1	NA	0.130195	0.0331168	0.100591	0.0035123	0.133708	0.0970785	0.53575	0.146331	0.461551	0.000822304	0.693399	0.453907
P11171	EPB41	Protein 4.1 OS=Homo sapiens OX=9606 GN=EPB41 PE=1 SV=4	NA	-0.0168557	-0.0826384	-0.00347916	-0.0692619	-0.0861176	0.0657827	0.0283241	0.25541	0.00614153	0.00241636	0.250061	0.181275
P11172	UMPS	Uridine 5'-monophosphate synthase OS=Homo sapiens OX=9606 GN=UMPS PE=1 SV=1	NA	-0.0115699	-0.207248	0.167031	-0.0286471	-0.040217	0.195678	0.0132886	0.659472	0.452374	0.00103347	0.0622455	0.600163
P11177	PDHB	Pyruvate dehydrogenase E1 component subunit beta, mitochondrial OS=Homo sapiens OX=9606 GN=PDHB PE=1 SV=3	NA	-0.0245099	-0.155644	0.00387596	-0.127258	-0.151768	0.131134	0.0343774	0.429839	0.00686819	0.00241636	0.508912	0.347413
P11182	DBT	Lipoamide acyltransferase component of branched-chain alpha-keto acid dehydrogenase complex, mitochondrial OS=Homo sapiens OX=9606 GN=DBT PE=1 SV=3	NA	0.0744815	-0.00385034	0.0420701	-0.0362617	0.0382198	0.0783318	0.107733	0.00507892	0.0598784	0.00103347	0.0459748	0.174974
P11216	PYGB	Glycogen phosphorylase, brain form OS=Homo sapiens OX=9606 GN=PYGB PE=1 SV=5	NA	-0.0127715	-0.260361	0.127926	-0.119664	-0.132435	0.247589	0.00941174	0.285322	0.122793	0.00241636	0.106928	0.417547
P11233	RALA	Ras-related protein Ral-A OS=Homo sapiens OX=9606 GN=RALA PE=1 SV=1	NA	-0.343217	-0.32247	0.0146168	0.0353631	-0.307854	-0.0207463	1.54589	1.21156	0.0337142	0.00241636	1.51342	0.057221
P11234	RALB	Ras-related protein Ral-B OS=Homo sapiens OX=9606 GN=RALB PE=1 SV=1	NA	-0.160892	-0.330182	0.242673	0.0733825	-0.0875091	0.16929	0.238223	0.934585	0.452374	0.00241636	0.16719	0.277396
P11274	BCR	Breakpoint cluster region protein OS=Homo sapiens OX=9606 GN=BCR PE=1 SV=2	NA	0.136699	-0.235607	0.208572	-0.163734	-0.0270348	0.372307	0.162577	0.579554	0.34633	0.00241636	0.0285003	0.797831
P11279	LAMP1	Lysosome-associated membrane glycoprotein 1 OS=Homo sapiens OX=9606 GN=LAMP1 PE=1 SV=3	NA	-0.043459	-0.276757	0.213042	-0.0202558	-0.0637148	0.233298	0.0876281	1.07662	0.728818	0.00103347	0.216334	0.785943
P11310	ACADM	Medium-chain specific acyl-CoA dehydrogenase, mitochondrial OS=Homo sapiens OX=9606 GN=ACADM PE=1 SV=1	NA	-0.0303048	-0.176285	0.0571743	-0.0888058	-0.119111	0.14598	0.0564221	0.995925	0.2543	0.00241636	0.524481	0.605683
P11387	TOP1	DNA topoisomerase 1 OS=Homo sapiens OX=9606 GN=TOP1 PE=1 SV=2	NA	-1.56141	-0.890326	-0.774683	-0.1036	-1.66501	-0.671083	4.3173	2.4571	2.59121	0.00241636	4.74235	2.04202
P11388	TOP2A	DNA topoisomerase 2-alpha OS=Homo sapiens OX=9606 GN=TOP2A PE=1 SV=3	NA	-3.00781	0.0716201	-3.06427	0.015165	-2.99265	-3.07943	6.02375	0.203181	6.55542	0.00103347	6.24258	6.17087
P11413	G6PD	Glucose-6-phosphate 1-dehydrogenase OS=Homo sapiens OX=9606 GN=G6PD PE=1 SV=4	NA	-0.126788	-0.361101	0.172959	-0.0613539	-0.188142	0.234313	0.194543	1.16782	0.608224	0.00241636	0.441375	0.788668
P11441	UBL4A	Ubiquitin-like protein 4A OS=Homo sapiens OX=9606 GN=UBL4A PE=1 SV=1	NA	0.206413	0.03901	0.0086723	-0.158731	0.0476823	0.167403	0.503442	0.100412	0.0118158	0.00241636	0.0648911	0.474331
P11498	PC	Pyruvate carboxylase, mitochondrial OS=Homo sapiens OX=9606 GN=PC PE=1 SV=2	NA	-0.0931085	-0.153935	0.194201	0.133375	0.040266	0.0608263	0.250044	0.823924	0.686594	0.00241636	0.0837608	0.21688
P11586	MTHFD1	C-1-tetrahydrofolate synthase, cytoplasmic OS=Homo sapiens OX=9606 GN=MTHFD1 PE=1 SV=3	NA	0.0742894	-0.0695746	0.0838587	-0.0600053	0.014284	0.143864	0.259624	0.355177	0.394423	0.00241636	0.0400703	0.789747
P11717	IGF2R	Cation-independent mannose-6-phosphate receptor OS=Homo sapiens OX=9606 GN=IGF2R PE=1 SV=3	NA	0.25283	-0.0834866	0.151202	-0.185115	0.0677152	0.336316	0.352987	0.27786	0.526451	0.00241636	0.173233	0.623872
P11766	ADH5	Alcohol dehydrogenase class-3 OS=Homo sapiens OX=9606 GN=ADH5 PE=1 SV=4	NA	-0.0436842	-0.317298	0.287378	0.0137641	-0.0299201	0.273614	0.0981342	1.49262	1.24091	0.000822304	0.0669727	1.24234
P11802	CDK4	Cyclin-dependent kinase 4 OS=Homo sapiens OX=9606 GN=CDK4 PE=1 SV=2	NA	-0.029542	-0.189542	0.155607	-0.00439308	-0.0339351	0.16	0.0364632	0.499024	0.387228	0.000822304	0.046136	0.443833
P11908	PRPS2	Ribose-phosphate pyrophosphokinase 2 OS=Homo sapiens OX=9606 GN=PRPS2 PE=1 SV=2	NA	0.0706808	-0.276894	0.0865698	-0.261005	-0.190324	0.347574	0.0648414	0.643623	0.243955	0.00241636	0.340381	0.89167
P11940	PABPC1	Polyadenylate-binding protein 1 OS=Homo sapiens OX=9606 GN=PABPC1 PE=1 SV=2	NA	0.10926	0.00181835	0.0492664	-0.0581753	0.0510848	0.107442	0.481029	0.00464441	0.171049	0.00241636	0.168515	0.580019
P12004	PCNA	Proliferating cell nuclear antigen OS=Homo sapiens OX=9606 GN=PCNA PE=1 SV=1	NA	0.04524	-0.189107	0.255397	0.0210503	0.0662903	0.234347	0.0991785	1.15874	1.46773	0.00103347	0.246571	1.06395
P12081	HARS	Histidine--tRNA ligase, cytoplasmic OS=Homo sapiens OX=9606 GN=HARS PE=1 SV=2	NA	-0.0794288	-0.269602	0.128221	-0.0619522	-0.141381	0.190173	0.190527	1.20208	0.39967	0.00241636	0.438453	0.822882
P12109	COL6A1	Collagen alpha-1(VI) chain OS=Homo sapiens OX=9606 GN=COL6A1 PE=1 SV=3	NA	-0.129554	-0.28793	0.448294	0.289918	0.160364	0.158376	0.242688	0.765623	0.716218	0.00241636	0.217937	0.335833
P12236	SLC25A6	ADP/ATP translocase 3 OS=Homo sapiens OX=9606 GN=SLC25A6 PE=1 SV=4	NA	-0.422555	-0.436813	-0.026773	-0.0410306	-0.463586	0.0142576	1.25033	1.30321	0.0457771	0.00241636	1.27374	0.036273
P12268	IMPDH2	Inosine-5'-monophosphate dehydrogenase 2 OS=Homo sapiens OX=9606 GN=IMPDH2 PE=1 SV=2	NA	0.150423	0.0514269	0.104694	0.00569783	0.156121	0.098996	0.438424	0.197177	0.461133	0.000822304	0.634361	0.376262
P12270	TPR	Nucleoprotein TPR OS=Homo sapiens OX=9606 GN=TPR PE=1 SV=3	NA	0.0101274	0.0706292	-0.0551877	0.00531411	0.0154415	-0.0605018	0.019189	0.338436	0.190539	0.000822304	0.0397342	0.225551
P12277	CKB	Creatine kinase B-type OS=Homo sapiens OX=9606 GN=CKB PE=1 SV=1	NA	0.0800762	-0.0931741	0.0975504	-0.0756998	0.00437636	0.17325	0.179216	0.413352	0.426919	0.00241636	0.0121461	0.624501
P12532	CKMT1A	Creatine kinase U-type, mitochondrial OS=Homo sapiens OX=9606 GN=CKMT1A PE=1 SV=1	NA	0.0504742	-0.0936012	0.128451	-0.0156243	0.0348498	0.144075	0.128128	0.576782	0.728818	0.00103347	0.137322	0.669137
P12694	BCKDHA	2-oxoisovalerate dehydrogenase subunit alpha, mitochondrial OS=Homo sapiens OX=9606 GN=BCKDHA PE=1 SV=2	NA	0.455209	0.155099	-0.304029	-0.60414	-0.14893	0.30011	0.0982764	0.0493694	0.0890331	0.00241636	0.0397342	0.080246
P12814	ACTN1	Alpha-actinin-1 OS=Homo sapiens OX=9606 GN=ACTN1 PE=1 SV=2	NA	-0.102352	-0.153876	0.0451055	-0.00641896	-0.108771	0.0515244	0.135229	0.560467	0.124594	0.000822304	0.240026	0.105499
P12955	PEPD	Xaa-Pro dipeptidase OS=Homo sapiens OX=9606 GN=PEPD PE=1 SV=3	NA	0.159205	-0.100269	0.272886	0.0134126	0.172617	0.259473	0.183873	0.167684	0.570471	0.000822304	0.270141	0.512388
P12956	XRCC6	X-ray repair cross-complementing protein 6 OS=Homo sapiens OX=9606 GN=XRCC6 PE=1 SV=2	NA	-0.0885795	-0.250015	0.121301	-0.0401344	-0.128714	0.161436	0.190173	0.999095	0.435445	0.00241636	0.324052	0.855797
P13010	XRCC5	X-ray repair cross-complementing protein 5 OS=Homo sapiens OX=9606 GN=XRCC5 PE=1 SV=3	NA	-0.064848	-0.263358	0.149819	-0.0486916	-0.11354	0.198511	0.13536	1.03003	0.46583	0.00241636	0.280083	0.897884
P13051	UNG	Uracil-DNA glycosylase OS=Homo sapiens OX=9606 GN=UNG PE=1 SV=2	NA	1.18567	0.534821	-0.0430783	-0.693926	0.491742	0.650847	1.64991	1.64011	0.0649706	0.0214154	1.84937	0.768573
P13073	COX4I1	Cytochrome c oxidase subunit 4 isoform 1, mitochondrial OS=Homo sapiens OX=9606 GN=COX4I1 PE=1 SV=1	NA	-0.277928	-0.431259	0.0797598	-0.0735712	-0.351499	0.153331	0.96378	1.45696	0.196094	0.00241636	1.75173	0.424211
P13473	LAMP2	Lysosome-associated membrane glycoprotein 2 OS=Homo sapiens OX=9606 GN=LAMP2 PE=1 SV=2	NA	-0.166061	-0.264184	-0.254199	-0.352322	-0.518383	0.0981235	0.259917	0.51737	0.44205	0.0214154	1.20874	0.180822
P13489	RNH1	Ribonuclease inhibitor OS=Homo sapiens OX=9606 GN=RNH1 PE=1 SV=2	NA	0.00224936	-0.187197	0.122688	-0.066759	-0.0645096	0.189446	0.00298522	0.992285	0.493958	0.00241636	0.214402	0.811689
P13637	ATP1A3	Sodium/potassium-transporting ATPase subunit alpha-3 OS=Homo sapiens OX=9606 GN=ATP1A3 PE=1 SV=3	NA	0.321567	0.195333	0.214925	0.0886911	0.410258	0.126234	0.429056	0.264277	0.196826	0.00241636	0.664978	0.124233
P13639	EEF2	Elongation factor 2 OS=Homo sapiens OX=9606 GN=EEF2 PE=1 SV=4	NA	0.108139	-0.0852861	0.246116	0.0526914	0.16083	0.193425	0.384845	0.535442	1.25726	0.00241636	0.75937	0.962869
P13667	PDIA4	Protein disulfide-isomerase A4 OS=Homo sapiens OX=9606 GN=PDIA4 PE=1 SV=2	NA	0.127318	-0.0214362	0.07479	-0.0739646	0.0533538	0.148755	0.562786	0.0747378	0.261893	0.00241636	0.17502	0.742134
P13674	P4HA1	Prolyl 4-hydroxylase subunit alpha-1 OS=Homo sapiens OX=9606 GN=P4HA1 PE=1 SV=2	NA	-0.0122695	0.02138	0.0185711	0.0522206	0.0399511	-0.0336495	0.021274	0.0417544	0.0278949	0.00241636	0.0766837	0.0718417
P13693	TPT1	Translationally-controlled tumor protein OS=Homo sapiens OX=9606 GN=TPT1 PE=1 SV=1	NA	0.249164	0.0531995	0.155195	-0.0407704	0.208394	0.195965	1.26283	0.211085	0.786283	0.00241636	1.18804	0.996297
P13716	ALAD	Delta-aminolevulinic acid dehydratase OS=Homo sapiens OX=9606 GN=ALAD PE=1 SV=1	NA	-0.209113	-0.362533	-0.0425425	-0.195962	-0.405075	0.15342	0.0953271	0.268712	0.0141761	0.00241636	0.1515	0.175851
P13797	PLS3	Plastin-3 OS=Homo sapiens OX=9606 GN=PLS3 PE=1 SV=4	NA	-0.13251	-0.34086	0.259848	0.0514976	-0.0810122	0.208351	0.313087	1.54078	1.12461	0.00241636	0.216503	0.773325
P13798	APEH	Acylamino-acid-releasing enzyme OS=Homo sapiens OX=9606 GN=APEH PE=1 SV=4	NA	-0.123362	-0.210376	0.112902	0.0258874	-0.0974745	0.0870143	0.283416	0.720364	0.273454	0.00103347	0.168515	0.405846
P13804	ETFA	Electron transfer flavoprotein subunit alpha, mitochondrial OS=Homo sapiens OX=9606 GN=ETFA PE=1 SV=1	NA	0.00764223	-0.140876	0.133801	-0.0147178	-0.00707554	0.148518	0.0120431	0.704118	0.653768	0.00103347	0.0169643	0.625077
P13807	GYS1	Glycogen [starch] synthase, muscle OS=Homo sapiens OX=9606 GN=GYS1 PE=1 SV=2	NA	-0.155889	-0.346023	-0.010133	-0.200267	-0.356156	0.190134	0.23346	0.865543	0.00904147	0.00241636	0.586422	0.410098
P13861	PRKAR2A	cAMP-dependent protein kinase type II-alpha regulatory subunit OS=Homo sapiens OX=9606 GN=PRKAR2A PE=1 SV=2	NA	0.0919781	-0.0582753	0.0773324	-0.0729209	0.0190572	0.150253	0.180057	0.170614	0.23929	0.00241636	0.0325981	0.579428
P13984	GTF2F2	General transcription factor IIF subunit 2 OS=Homo sapiens OX=9606 GN=GTF2F2 PE=1 SV=2	NA	-0.112167	-0.0277691	-0.0982133	-0.0138154	-0.125982	-0.0843979	0.251103	0.0384895	0.155037	0.000822304	0.324868	0.157925
P13987	CD59	CD59 glycoprotein OS=Homo sapiens OX=9606 GN=CD59 PE=1 SV=1	NA	-0.376489	-0.136015	-0.021836	0.218638	-0.157851	-0.240474	0.784923	0.32401	0.0386126	0.00241636	0.49411	0.477215
P13995	MTHFD2	Bifunctional methylenetetrahydrofolate dehydrogenase/cyclohydrolase, mitochondrial OS=Homo sapiens OX=9606 GN=MTHFD2 PE=1 SV=2	NA	0.0916441	-0.05141	0.0550594	-0.0879947	0.00364932	0.143054	0.19947	0.117681	0.103292	0.00241636	0.00593766	0.498473
P14174	MIF	Macrophage migration inhibitory factor OS=Homo sapiens OX=9606 GN=MIF PE=1 SV=4	NA	0.665392	0.257934	0.581246	0.173789	0.83918	0.407458	1.89181	0.913072	2.18216	0.00241636	2.62139	1.25473
P14209	CD99	CD99 antigen OS=Homo sapiens OX=9606 GN=CD99 PE=1 SV=1	NA	-1.10632	-0.849442	-0.0262316	0.230641	-0.875674	-0.256873	1.15397	0.599005	0.00991298	0.00241636	0.694199	0.172253
P14314	PRKCSH	Glucosidase 2 subunit beta OS=Homo sapiens OX=9606 GN=PRKCSH PE=1 SV=2	NA	0.104043	-0.0797063	0.113403	-0.0703458	0.0336971	0.183749	0.351771	0.347268	0.572796	0.00241636	0.0989378	0.962869
P14324	FDPS	Farnesyl pyrophosphate synthase OS=Homo sapiens OX=9606 GN=FDPS PE=1 SV=4	NA	-0.0981839	-0.242758	0.201691	0.0571162	-0.0410677	0.144575	0.15666	0.821988	0.9772	0.00241636	0.0701452	0.497173
P14406	COX7A2	Cytochrome c oxidase subunit 7A2, mitochondrial OS=Homo sapiens OX=9606 GN=COX7A2 PE=1 SV=1	NA	-0.702732	-0.83505	-0.334522	-0.46684	-1.16957	0.132318	0.76445	1.0478	0.239613	0.00241636	1.18094	0.128035
P14550	AKR1A1	Aldo-keto reductase family 1 member A1 OS=Homo sapiens OX=9606 GN=AKR1A1 PE=1 SV=3	NA	0.0523557	-0.539617	0.483822	-0.108151	-0.0557953	0.591973	0.0981342	0.767561	0.563803	0.00241636	0.125044	0.808999
P14618	PKM	Pyruvate kinase PKM OS=Homo sapiens OX=9606 GN=PKM PE=1 SV=4	NA	0.0136753	-0.150313	0.130684	-0.0333043	-0.019629	0.163988	0.0254674	0.876288	0.474078	0.00241636	0.041856	0.758594
P14625	HSP90B1	Endoplasmin OS=Homo sapiens OX=9606 GN=HSP90B1 PE=1 SV=1	NA	0.0348995	-0.0740786	0.0755388	-0.0334393	0.00146016	0.108978	0.0761712	0.350969	0.318544	0.00241636	0.00436164	0.437185
P14635	CCNB1	G2/mitotic-specific cyclin-B1 OS=Homo sapiens OX=9606 GN=CCNB1 PE=1 SV=1	NA	-0.191694	-0.172892	-0.000910247	0.0178922	-0.173802	-0.0188025	0.722739	0.683059	0.00182035	0.00103347	0.645727	0.0542676
P14649	MYL6B	Myosin light chain 6B OS=Homo sapiens OX=9606 GN=MYL6B PE=1 SV=1	NA	-0.756575	-0.522439	-0.410785	-0.176649	-0.933224	-0.234136	2.07299	0.900528	0.458605	0.00241636	1.78161	0.350305
P14678	SNRPB	Small nuclear ribonucleoprotein-associated proteins B and B' OS=Homo sapiens OX=9606 GN=SNRPB PE=1 SV=2	NA	-0.214317	-0.25835	-0.00769451	-0.0517271	-0.266044	0.0440326	0.384845	1.0654	0.0198671	0.00241636	1.15628	0.0779844
P14735	IDE	Insulin-degrading enzyme OS=Homo sapiens OX=9606 GN=IDE PE=1 SV=4	NA	0.0183296	-0.00520123	-0.0308592	-0.05439	-0.0360604	0.0235308	0.0182722	0.00696533	0.0391237	0.00224569	0.0343869	0.050183
P14854	COX6B1	Cytochrome c oxidase subunit 6B1 OS=Homo sapiens OX=9606 GN=COX6B1 PE=1 SV=2	NA	-0.074624	-0.191884	-0.00519293	-0.122453	-0.197077	0.11726	0.116084	0.934585	0.013741	0.00241636	1.01451	0.300763
P14859	POU2F1	POU domain, class 2, transcription factor 1 OS=Homo sapiens OX=9606 GN=POU2F1 PE=1 SV=2	NA	-0.293284	-0.167507	-0.067465	0.0583115	-0.234972	-0.125777	1.12685	0.675971	0.21361	0.00241636	0.916972	0.5018
P14866	HNRNPL	Heterogeneous nuclear ribonucleoprotein L OS=Homo sapiens OX=9606 GN=HNRNPL PE=1 SV=2	NA	-1.34093	-0.426552	-0.847591	0.0667847	-1.27414	-0.914376	5.11299	2.34104	3.79988	0.00241636	5.19797	3.90549
P14868	DARS	Aspartate--tRNA ligase, cytoplasmic OS=Homo sapiens OX=9606 GN=DARS PE=1 SV=2	NA	-0.0319903	-0.32148	0.173045	-0.116444	-0.148434	0.289489	0.0435085	1.02817	0.585561	0.00241636	0.287893	1.54795
P14923	JUP	Junction plakoglobin OS=Homo sapiens OX=9606 GN=JUP PE=1 SV=3	NA	-0.191627	-0.0842764	-0.132499	-0.0251481	-0.216775	-0.107351	0.495623	0.231222	0.283332	0.00103347	0.763933	0.231892
P14927	UQCRB	Cytochrome b-c1 complex subunit 7 OS=Homo sapiens OX=9606 GN=UQCRB PE=1 SV=2	NA	-0.193417	-0.386504	0.0959022	-0.0971846	-0.290602	0.193087	0.354848	1.528	0.283997	0.00241636	1.06339	0.475814
P15104	GLUL	Glutamine synthetase OS=Homo sapiens OX=9606 GN=GLUL PE=1 SV=4	NA	0.221756	0.00731698	0.131667	-0.0827717	0.138984	0.214439	0.431165	0.0111026	0.312188	0.00241636	0.306558	0.52954
P15121	AKR1B1	Aldo-keto reductase family 1 member B1 OS=Homo sapiens OX=9606 GN=AKR1B1 PE=1 SV=3	NA	-0.0576893	-0.282441	0.254021	0.0292693	-0.0284199	0.224751	0.0961305	1.12535	0.931726	0.00103347	0.0401898	1.05535
P15151	PVR	Poliovirus receptor OS=Homo sapiens OX=9606 GN=PVR PE=1 SV=2	NA	-0.136607	-0.287931	0.204551	0.053226	-0.0833805	0.151325	0.0824	0.518468	0.273396	0.00103347	0.17502	0.116712
P15170	GSPT1	Eukaryotic peptide chain release factor GTP-binding subunit ERF3A OS=Homo sapiens OX=9606 GN=GSPT1 PE=1 SV=1	NA	7.85836e-05	-0.208755	0.182896	-0.0259372	-0.0258586	0.208833	0.000126383	1.06698	0.705775	0.00148624	0.0672477	0.831997
P15311	EZR	Ezrin OS=Homo sapiens OX=9606 GN=EZR PE=1 SV=4	NA	0.0302174	-0.101346	0.184481	0.0529176	0.083135	0.131563	0.0575425	0.515283	0.894625	0.00241636	0.402075	0.450737
P15374	UCHL3	Ubiquitin carboxyl-terminal hydrolase isozyme L3 OS=Homo sapiens OX=9606 GN=UCHL3 PE=1 SV=1	NA	-0.016344	-0.340871	0.287601	-0.0369269	-0.0532709	0.324527	0.0343774	1.73469	1.27799	0.00241636	0.143665	1.71357
P15531	NME1	Nucleoside diphosphate kinase A OS=Homo sapiens OX=9606 GN=NME1 PE=1 SV=1	NA	-0.0292091	-0.208862	0.208364	0.0287106	-0.000498513	0.179653	0.0535656	1.17708	0.744254	0.00103347	0.000942154	0.638571
P15586	GNS	N-acetylglucosamine-6-sulfatase OS=Homo sapiens OX=9606 GN=GNS PE=1 SV=3	NA	0.217223	0.0338167	0.0356562	-0.14775	0.0694728	0.183406	0.289502	0.0490386	0.0338602	0.00241636	0.103312	0.230202
P15880	RPS2	40S ribosomal protein S2 OS=Homo sapiens OX=9606 GN=RPS2 PE=1 SV=2	NA	0.198733	0.384242	-0.179521	0.00598793	0.204721	-0.185509	0.333503	1.36333	0.365014	0.000822304	0.401957	0.424211
P15923	TCF3	Transcription factor E2-alpha OS=Homo sapiens OX=9606 GN=TCF3 PE=1 SV=1	NA	-0.618673	0.115523	-0.3239	0.410296	-0.208377	-0.734196	0.363811	0.063797	0.422131	0.00241636	0.093477	1.17921
P15924	DSP	Desmoplakin OS=Homo sapiens OX=9606 GN=DSP PE=1 SV=3	NA	0.0246776	-0.0713242	0.0880409	-0.00796084	0.0167168	0.0960018	0.0471514	0.30118	0.360301	0.000822304	0.0382831	0.35963
P15927	RPA2	Replication protein A 32 kDa subunit OS=Homo sapiens OX=9606 GN=RPA2 PE=1 SV=1	NA	-0.171361	-0.104512	0.011751	0.0786002	-0.0927608	-0.0668493	0.537612	0.282711	0.0214238	0.00241636	0.31797	0.165269
P15954	COX7C	Cytochrome c oxidase subunit 7C, mitochondrial OS=Homo sapiens OX=9606 GN=COX7C PE=1 SV=1	NA	-0.363095	-0.669162	-0.0569447	-0.363012	-0.726107	0.306067	0.756833	1.98705	0.163919	0.0214154	2.25988	0.899594
P16083	NQO2	Ribosyldihydronicotinamide dehydrogenase [quinone] OS=Homo sapiens OX=9606 GN=NQO2 PE=1 SV=5	NA	-0.000949423	-0.319725	0.267493	-0.0512823	-0.0522317	0.318775	0.00131754	1.16024	0.538721	0.00241636	0.0766837	1.12155
P16152	CBR1	Carbonyl reductase [NADPH] 1 OS=Homo sapiens OX=9606 GN=CBR1 PE=1 SV=3	NA	0.00989075	-0.105181	0.145068	0.0299962	0.0398869	0.115072	0.0182484	0.484617	0.490959	0.00224569	0.107473	0.417547
P16220	CREB1	Cyclic AMP-responsive element-binding protein 1 OS=Homo sapiens OX=9606 GN=CREB1 PE=1 SV=2	NA	-0.128501	0.0336373	-0.231366	-0.0692282	-0.197729	-0.162138	0.190527	0.0303919	0.249408	0.00241636	0.252252	0.239008
P16278	GLB1	Beta-galactosidase OS=Homo sapiens OX=9606 GN=GLB1 PE=1 SV=2	NA	0.108103	-0.0481794	0.20152	0.045238	0.153341	0.156282	0.165611	0.115194	0.664195	0.00241636	0.36118	0.452667
P16333	NCK1	Cytoplasmic protein NCK1 OS=Homo sapiens OX=9606 GN=NCK1 PE=1 SV=1	NA	-0.130211	-0.281008	-0.0129181	-0.163715	-0.293926	0.150797	0.0594338	0.228914	0.0130372	0.00241636	0.182969	0.244514
P16383	GCFC2	GC-rich sequence DNA-binding factor 2 OS=Homo sapiens OX=9606 GN=GCFC2 PE=1 SV=2	NA	0.285002	0.195193	-0.159189	-0.248999	0.0360033	0.0898093	0.509569	0.286014	0.178805	0.00241636	0.0715586	0.0883352
P16403	H1-2	Histone H1.2 OS=Homo sapiens OX=9606 GN=H1-2 PE=1 SV=2	NA	-1.96853	-0.0704825	-1.7404	0.157651	-1.81088	-1.89805	2.70306	0.0906274	2.22366	0.00241636	2.8038	2.20928
P16435	POR	NADPH--cytochrome P450 reductase OS=Homo sapiens OX=9606 GN=POR PE=1 SV=2	NA	-0.182275	-0.633346	0.237933	-0.213138	-0.395414	0.451071	0.151949	1.15936	0.598698	0.00241636	0.710673	0.825851
P16615	ATP2A2	Sarcoplasmic/endoplasmic reticulum calcium ATPase 2 OS=Homo sapiens OX=9606 GN=ATP2A2 PE=1 SV=1	NA	-0.333133	-0.364706	0.0980551	0.0664827	-0.26665	0.0315724	1.4243	1.83675	0.372356	0.00241636	1.32478	0.0929673
P16930	FAH	Fumarylacetoacetase OS=Homo sapiens OX=9606 GN=FAH PE=1 SV=2	NA	-0.217284	-0.507836	0.0536232	-0.236929	-0.454213	0.290552	0.664369	1.99552	0.107407	0.00241636	1.36606	1.44181
P16949	STMN1	Stathmin OS=Homo sapiens OX=9606 GN=STMN1 PE=1 SV=3	NA	0.124545	-0.0600272	0.134573	-0.0499989	0.0745459	0.184572	0.344806	0.271213	0.653768	0.00241636	0.296798	0.70564
P16989	YBX3	Y-box-binding protein 3 OS=Homo sapiens OX=9606 GN=YBX3 PE=1 SV=4	NA	-0.00272535	-0.235561	0.156165	-0.0766699	-0.0793953	0.232835	0.00298522	0.772227	0.58245	0.00241636	0.183291	0.932669
P17028	ZNF24	Zinc finger protein 24 OS=Homo sapiens OX=9606 GN=ZNF24 PE=1 SV=4	NA	-0.917602	-0.678202	-0.211185	0.0282149	-0.889387	-0.2394	3.55493	2.4571	0.753463	0.00219234	3.54811	0.911758
P17096	HMGA1	High mobility group protein HMG-I/HMG-Y OS=Homo sapiens OX=9606 GN=HMGA1 PE=1 SV=3	NA	-1.68174	-0.51745	-1.14107	0.023217	-1.65852	-1.16429	3.51371	1.28739	2.35677	0.000822304	3.40322	2.44422
P17174	GOT1	Aspartate aminotransferase, cytoplasmic OS=Homo sapiens OX=9606 GN=GOT1 PE=1 SV=3	NA	-0.0120897	-0.25331	0.136799	-0.104421	-0.116511	0.24122	0.0241704	1.31028	0.548009	0.00241636	0.424451	1.3626
P17480	UBTF	Nucleolar transcription factor 1 OS=Homo sapiens OX=9606 GN=UBTF PE=1 SV=1	NA	-3.27428	-1.17651	-2.04066	0.0571079	-3.21717	-2.09776	6.02375	1.20899	2.10236	0.00241636	6.24258	2.16803
P17612	PRKACA	cAMP-dependent protein kinase catalytic subunit alpha OS=Homo sapiens OX=9606 GN=PRKACA PE=1 SV=2	NA	-0.24302	-0.153686	-0.275531	-0.186197	-0.429217	-0.0893334	0.280739	0.133786	0.267543	0.00241636	0.746261	0.0798876
P17655	CAPN2	Calpain-2 catalytic subunit OS=Homo sapiens OX=9606 GN=CAPN2 PE=1 SV=6	NA	-0.14426	-0.282238	0.15127	0.0132916	-0.130968	0.137978	0.264998	0.745284	0.2543	0.000822304	0.169955	0.499509
P17812	CTPS1	CTP synthase 1 OS=Homo sapiens OX=9606 GN=CTPS1 PE=1 SV=2	NA	0.0641439	-0.168192	0.138992	-0.0933446	-0.0292008	0.232336	0.12592	0.671145	0.673075	0.00241636	0.0582161	1.17977
P17844	DDX5	Probable ATP-dependent RNA helicase DDX5 OS=Homo sapiens OX=9606 GN=DDX5 PE=1 SV=1	NA	-1.06544	-0.366294	-0.757746	-0.0585981	-1.12404	-0.699148	4.6468	1.72954	3.34595	0.00241636	4.85838	3.15298
P17858	PFKL	ATP-dependent 6-phosphofructokinase, liver type OS=Homo sapiens OX=9606 GN=PFKL PE=1 SV=6	NA	-0.0378963	-0.321306	0.1373	-0.14611	-0.184006	0.283409	0.0566612	1.16931	0.518702	0.00241636	0.513278	1.24234
P17900	GM2A	Ganglioside GM2 activator OS=Homo sapiens OX=9606 GN=GM2A PE=1 SV=4	NA	0.018955	-0.272476	0.154404	-0.137027	-0.118072	0.291431	0.0125238	0.405946	0.215329	0.00241636	0.102247	0.615501
P17980	PSMC3	26S proteasome regulatory subunit 6A OS=Homo sapiens OX=9606 GN=PSMC3 PE=1 SV=3	NA	0.110225	0.012975	0.0660333	-0.0312167	0.0790082	0.0972499	0.391953	0.0407597	0.196792	0.00241636	0.232989	0.430534
P17987	TCP1	T-complex protein 1 subunit alpha OS=Homo sapiens OX=9606 GN=TCP1 PE=1 SV=1	NA	-0.0840831	-0.28254	0.111212	-0.0872449	-0.171328	0.198457	0.252355	1.64733	0.491838	0.00241636	0.811468	1.03594
P18031	PTPN1	Tyrosine-protein phosphatase non-receptor type 1 OS=Homo sapiens OX=9606 GN=PTPN1 PE=1 SV=1	NA	0.036457	-0.0644804	0.0695718	-0.0313656	0.00509141	0.100937	0.0528515	0.209562	0.206156	0.00103347	0.0112839	0.241022
P18065	IGFBP2	Insulin-like growth factor-binding protein 2 OS=Homo sapiens OX=9606 GN=IGFBP2 PE=1 SV=2	NA	0.207434	0.402865	-0.292465	-0.0970341	0.1104	-0.195431	0.0741961	0.291174	0.367694	0.00103347	0.0446876	0.157925
P18077	RPL35A	60S ribosomal protein L35a OS=Homo sapiens OX=9606 GN=RPL35A PE=1 SV=2	NA	0.960577	2.60501	-1.53774	0.106698	1.06727	-1.64443	0.622067	3.24326	0.835163	0.000822304	0.636265	1.12155
P18085	ARF4	ADP-ribosylation factor 4 OS=Homo sapiens OX=9606 GN=ARF4 PE=1 SV=3	NA	0.025899	-0.507197	0.257754	-0.275342	-0.249443	0.533096	0.0164891	1.39962	0.618869	0.00241636	0.559292	0.848422
P18124	RPL7	60S ribosomal protein L7 OS=Homo sapiens OX=9606 GN=RPL7 PE=1 SV=1	NA	1.05586	2.85676	-1.77825	0.022645	1.07851	-1.8009	0.695435	3.00729	0.878498	0.000822304	0.584634	1.12682
P18206	VCL	Vinculin OS=Homo sapiens OX=9606 GN=VCL PE=1 SV=4	NA	0.00768826	-0.157314	0.139981	-0.0250211	-0.0173328	0.165002	0.0121414	0.697524	0.576734	0.00136168	0.041856	0.597799
P18583	SON	Protein SON OS=Homo sapiens OX=9606 GN=SON PE=1 SV=4	NA	-0.682919	0.284559	-0.966306	0.00117218	-0.681747	-0.967478	2.80108	1.11493	2.73673	0.000822304	2.18522	3.26143
P18615	NELFE	Negative elongation factor E OS=Homo sapiens OX=9606 GN=NELFE PE=1 SV=3	NA	0.0517537	-0.0474321	-0.0609654	-0.160151	-0.108397	0.0991857	0.12592	0.182669	0.193538	0.00241636	0.365142	0.453871
P18621	RPL17	60S ribosomal protein L17 OS=Homo sapiens OX=9606 GN=RPL17 PE=1 SV=3	NA	0.678793	1.99977	-1.33653	-0.0155537	0.66324	-1.32097	0.757198	4.44306	1.4913	0.000822304	0.694791	1.63403
P18669	PGAM1	Phosphoglycerate mutase 1 OS=Homo sapiens OX=9606 GN=PGAM1 PE=1 SV=2	NA	0.0554862	-0.0275627	0.192594	0.109545	0.165032	0.0830489	0.113172	0.121925	1.1258	0.00241636	0.919532	0.284759
P18754	RCC1	Regulator of chromosome condensation OS=Homo sapiens OX=9606 GN=RCC1 PE=1 SV=1	NA	-0.319686	-0.0116881	-0.361728	-0.0537299	-0.373416	-0.307998	1.69831	0.0340351	2.02812	0.00241636	2.04699	1.73106
P18858	LIG1	DNA ligase 1 OS=Homo sapiens OX=9606 GN=LIG1 PE=1 SV=1	NA	0.294621	-0.0998463	0.261331	-0.133137	0.161484	0.394468	0.903427	0.492261	1.24091	0.00241636	0.795727	1.24133
P18859	ATP5PF	ATP synthase-coupling factor 6, mitochondrial OS=Homo sapiens OX=9606 GN=ATP5PF PE=1 SV=1	NA	0.00941215	-0.130183	-0.0452821	-0.184877	-0.175465	0.139595	0.00864433	0.577046	0.141887	0.00241636	0.807395	0.239008
P18887	XRCC1	DNA repair protein XRCC1 OS=Homo sapiens OX=9606 GN=XRCC1 PE=1 SV=2	NA	-0.318412	-0.303831	0.0324843	0.0470659	-0.271347	-0.0145817	0.695698	1.4042	0.0773558	0.00219234	1.40196	0.0203546
P19022	CDH2	Cadherin-2 OS=Homo sapiens OX=9606 GN=CDH2 PE=1 SV=4	NA	-0.26822	-0.0712686	-0.134039	0.0629132	-0.205307	-0.196952	0.443244	0.25832	0.336674	0.00241636	0.700085	0.348262
P19174	PLCG1	1-phosphatidylinositol 4,5-bisphosphate phosphodiesterase gamma-1 OS=Homo sapiens OX=9606 GN=PLCG1 PE=1 SV=1	NA	0.140133	-0.0273364	0.215902	0.048433	0.188566	0.167469	0.311556	0.0418298	0.476647	0.00241636	0.479974	0.436546
P19338	NCL	Nucleolin OS=Homo sapiens OX=9606 GN=NCL PE=1 SV=3	NA	-0.0210533	-0.0303255	-0.0676807	-0.076953	-0.0980062	0.00927224	0.0523865	0.117989	0.295657	0.00241636	0.456396	0.0333957
P19367	HK1	Hexokinase-1 OS=Homo sapiens OX=9606 GN=HK1 PE=1 SV=3	NA	-0.308522	-0.0709414	-0.236723	0.000857923	-0.307664	-0.237581	0.668198	0.114111	0.399437	0.000822304	0.459699	0.897884
P19387	POLR2C	DNA-directed RNA polymerase II subunit RPB3 OS=Homo sapiens OX=9606 GN=POLR2C PE=1 SV=2	NA	-0.264519	-0.250213	0.0981576	0.112463	-0.152056	-0.0143057	1.1167	1.09254	0.254713	0.00241636	0.530769	0.0338539
P19388	POLR2E	DNA-directed RNA polymerases I, II, and III subunit RPABC1 OS=Homo sapiens OX=9606 GN=POLR2E PE=1 SV=4	NA	-0.443221	-0.24004	-0.123247	0.0799341	-0.363287	-0.203181	1.37883	0.849064	0.284818	0.00241636	1.66755	0.461692
P19404	NDUFV2	NADH dehydrogenase [ubiquinone] flavoprotein 2, mitochondrial OS=Homo sapiens OX=9606 GN=NDUFV2 PE=1 SV=2	NA	0.00187806	-0.158551	-0.0454966	-0.205926	-0.204048	0.160429	0.0020807	0.329007	0.0526649	0.00241636	0.573245	0.331077
P19447	ERCC3	General transcription and DNA repair factor IIH helicase subunit XPB OS=Homo sapiens OX=9606 GN=ERCC3 PE=1 SV=1	NA	1.11163	1.51141	-0.950029	-0.550241	0.561385	-0.399789	0.21	0.455369	0.206317	0.00241636	0.158897	0.069144
P19525	PKR	Interferon-induced, double-stranded RNA-activated protein kinase OS=Homo sapiens OX=9606 GN=EIF2AK2 PE=1 SV=2	defense response to virus	-0.0986018	0.0107935	-0.24298	-0.133585	-0.232187	-0.109395	0.160756	0.0150354	0.592256	0.00241636	0.470274	0.362382
P19623	SRM	Spermidine synthase OS=Homo sapiens OX=9606 GN=SRM PE=1 SV=1	NA	0.509175	0.368564	0.0790522	-0.0615584	0.447617	0.140611	1.19743	0.747571	0.144745	0.00241636	0.986113	0.37796
P19784	CSNK2A2	Casein kinase II subunit alpha' OS=Homo sapiens OX=9606 GN=CSNK2A2 PE=1 SV=1	NA	-0.0650021	0.0239134	-0.0941256	-0.00521004	-0.0702122	-0.0889155	0.118244	0.0860255	0.310548	0.000822304	0.210182	0.254714
P20020	ATP2B1	Plasma membrane calcium-transporting ATPase 1 OS=Homo sapiens OX=9606 GN=ATP2B1 PE=1 SV=4	NA	0.046731	-0.296773	0.157529	-0.185975	-0.139244	0.343504	0.0593915	0.941512	0.384867	0.00241636	0.417642	0.828895
P20042	EIF2S2	Eukaryotic translation initiation factor 2 subunit 2 OS=Homo sapiens OX=9606 GN=EIF2S2 PE=1 SV=2	NA	-0.230578	-0.237549	0.00573764	-0.00123397	-0.231812	0.0069716	0.940768	1.13761	0.014775	0.000822304	1.14839	0.0197991
P20073	ANXA7	Annexin A7 OS=Homo sapiens OX=9606 GN=ANXA7 PE=1 SV=3	NA	-0.158245	0.441216	-0.599748	-0.000286665	-0.158532	-0.599461	0.23346	0.930661	1.34636	0.000581931	0.403761	1.14185
P20290	BTF3	Transcription factor BTF3 OS=Homo sapiens OX=9606 GN=BTF3 PE=1 SV=1	NA	0.0509665	-0.134697	0.232456	0.0467927	0.0977592	0.185663	0.125555	0.297933	0.479773	0.00241636	0.296452	0.449146
P20336	RAB3A	Ras-related protein Rab-3A OS=Homo sapiens OX=9606 GN=RAB3A PE=1 SV=1	NA	0.202163	-0.216325	-0.129988	-0.548476	-0.346312	0.418488	0.167861	0.198234	0.135875	0.069342	0.419867	0.632964
P20338	RAB4A	Ras-related protein Rab-4A OS=Homo sapiens OX=9606 GN=RAB4A PE=1 SV=3	NA	0.13303	0.047768	0.00245847	-0.0828033	0.0502265	0.0852617	0.159331	0.0455659	0.0020389	0.00241636	0.053189	0.12411
P20339	RAB5A	Ras-related protein Rab-5A OS=Homo sapiens OX=9606 GN=RAB5A PE=1 SV=2	NA	0.126166	-0.415737	0.347396	-0.194507	-0.0683413	0.541903	0.0305909	0.239579	0.330816	0.00241636	0.0220475	0.387237
P20340	RAB6A	Ras-related protein Rab-6A OS=Homo sapiens OX=9606 GN=RAB6A PE=1 SV=3	NA	-0.0815903	-0.175143	-0.053982	-0.147535	-0.229125	0.0935527	0.125555	0.483417	0.105976	0.00241636	0.60728	0.234577
[truncated: 2,980 more rows]
